# Supplementary material for: BRD4 bimodal binding at promoters and drug-induced displacement at Pol II pause sites associates with I-BET sensitivity
Source: PubMed Central journal article supplement (PMC6604197; doi:10.1186/s13072-019-0286-5), 2019-07-02

Supplementary Figure 1, Khoueiry, Gahlawat et al.

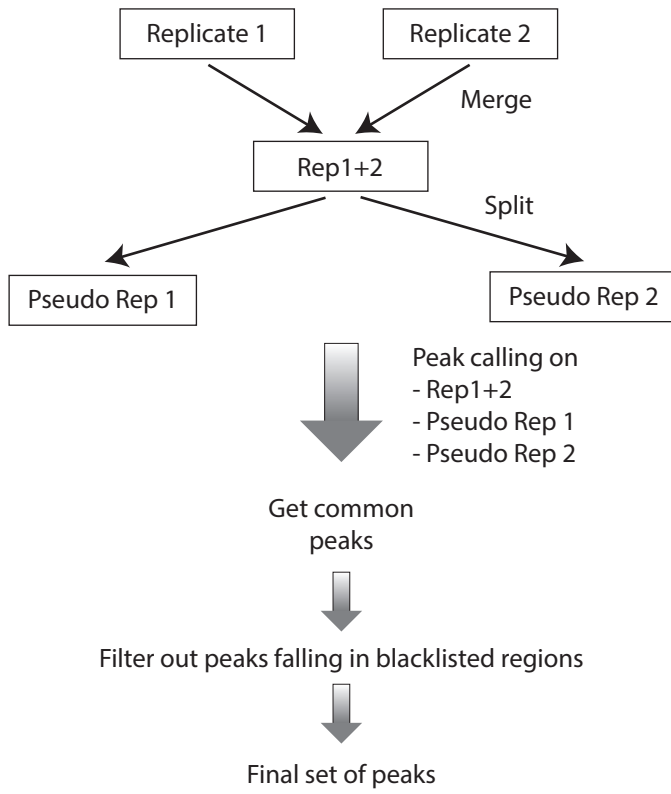

Supplement: 13072_2019_286_MOESM2_ESM.pdf [file 13072_2019_286_MOESM2_ESM.pdf]
