# Supplementary material for: BRD4 bimodal binding at promoters and drug-induced displacement at Pol II pause sites associates with I-BET sensitivity
Source: Epigenetics Chromatin. 2019 Jul 2;12:39. doi: 10.1186/s13072-019-0286-5 (PMC6604197; doi:10.1186/s13072-019-0286-5)
Supplement: Supplementary file 8 — Additional file 8: Table S5. Same as supplementary Table 4 but for K562. [file 13072_2019_286_MOESM8_ESM.xlsx]

## Sheet: Supp 4-MV411 DB DESeq2 results
gene	Symbol	RefSeq	ensID	mb4_50_1kb_Up.baseMean	mb4_50_1kb_Up.log2FoldChange	mb4_50_1kb_Up.padj	mb4_50_1kb_Down.baseMean	mb4_50_1kb_Down.log2FoldChange	mb4_50_1kb_Down.padj	mb4_500_1kb_Up.baseMean	mb4_500_1kb_Up.log2FoldChange	mb4_500_1kb_Up.padj	mb4_500_1kb_Down.baseMean	mb4_500_1kb_Down.log2FoldChange	mb4_500_1kb_Down.padj	mb4_5000_1kb_Up.baseMean	mb4_5000_1kb_Up.log2FoldChange	mb4_5000_1kb_Up.padj	mb4_5000_1kb_Down.baseMean	mb4_5000_1kb_Down.log2FoldChange	mb4_5000_1kb_Down.padj
CCDC26_NR_130917	CCDC26	NR_130917	ENSG00000229140	255.49	-0.659832	0.0329803	363.331	-0.597064	0.0389056	167.177	-2.03988	7.81032e-10	223.969	-2.1951	8.51416e-15	150.754	-2.96496	1.92199e-18	210.12	-2.75175	3.04115e-24
LOC101927851_NR_125945	LOC101927851	NR_125945	ENSG00000238005	256.012	-0.492014	0.0726505	183.032	-0.4699	0.12863	159.997	-1.98598	2.15234e-10	124.671	-1.32565	0.000353704	148.001	-2.56547	5.52302e-17	106.138	-2.32563	2.87096e-11
TCF23_NM_175769	TCF23	NM_175769	ENSG00000163792	207.367	-0.905278	0.00196174	289.869	-0.748892	0.0201963	137.74	-2.44487	2.88458e-14	192.728	-1.9523	5.63528e-12	135.145	-2.54713	4.88519e-16	174.192	-2.80959	1.21041e-22
LOC101926963_NR_110055	LOC101926963	NR_110055	N/A	197.819	-0.766223	0.0188093	179.416	-0.618168	0.055684	137.623	-1.80794	3.12863e-08	121.749	-1.57872	1.42028e-06	123.431	-2.60377	1.00605e-15	110.886	-2.16549	1.5057e-11
NRROS_NM_198565	NRROS	NM_198565	ENSG00000174004	338.887	-0.313558	0.155291	370.908	-0.286897	0.19993	235.917	-1.08968	0.000263845	253.873	-1.04134	0.000143204	194.554	-2.12234	3.52785e-15	218.807	-1.75926	1.62411e-12
B3GNT7_NM_145236	B3GNT7	NM_145236	ENSG00000156966	220.061	-0.624493	0.033726	125.679	-0.514047	0.10625	153.692	-1.54662	1.22232e-06	88.3357	-1.24091	0.000922263	136.237	-2.29913	4.71788e-14	75.1658	-2.14122	9.43229e-09
MEF2D_NM_001271629	MEF2D	NM_001271629	ENSG00000116604	190.3	-0.573067	0.0581549	150.658	-0.381456	0.19224	130.467	-1.52492	2.21868e-05	100.835	-1.25911	0.000292379	112.987	-2.50672	7.89577e-14	95.8643	-1.49993	7.83822e-06
LINC01585_NR_120371	LINC01585	NR_120371	ENSG00000245479	178.467	-1.03297	0.000789164	173.965	-0.654492	0.0534516	130.98	-1.9264	7.53281e-09	117.504	-1.67178	5.91909e-07	119.831	-2.54566	7.89577e-14	106.741	-2.31721	5.93672e-12
MIR4777_NR_039937	MIR4777	NR_039937	ENSG00000263641	171.463	-0.720262	0.0264836	101.655	-0.755678	0.0472032	119.369	-1.71969	5.29522e-07	76.8699	-1.25248	0.00106498	107.363	-2.45832	2.81858e-13	65.0667	-2.18136	8.90219e-08
MS4A6A_NM_022349	MS4A6A	NM_022349	ENSG00000110077	194.734	-0.657251	0.0437233	255.83	-0.624428	0.055684	134.863	-1.66258	4.23361e-06	179.246	-1.44442	8.84645e-06	120.261	-2.45906	8.08074e-13	161.857	-2.05487	5.74907e-12
NDUFS2_NM_001166159	NDUFS2	NM_001166159	ENSG00000158864	189.514	-0.554983	0.0587199	83.1992	-0.433014	0.1877	132.742	-1.41759	2.15681e-05	57.1947	-1.19813	0.00384346	114.712	-2.31647	9.31487e-13	57.5742	-1.16232	0.00499614
MIR6079_NR_106727	MIR6079	NR_106727	ENSG00000283477	310.165	-0.231842	0.282304	381.09	-0.259907	0.280845	209.878	-1.08448	0.00226325	258.401	-0.827781	0.101504	174.218	-2.08858	1.11595e-12	209.387	-2.21835	2.30132e-15
DENND2D_NM_001271833	DENND2D	NM_001271833	ENSG00000162777	187.671	-0.550485	0.063586	154.869	-0.581646	0.0924988	124.14	-1.71739	4.46161e-07	108.394	-1.37522	6.70381e-05	112.284	-2.36246	3.1394e-12	94.1453	-2.22682	1.30274e-10
BZRAP1-AS1_NR_038414	BZRAP1-AS1	NR_038414	ENSG00000265148	206.527	-0.668783	0.0281225	202.359	-0.459381	0.114414	158.176	-1.16461	0.000338793	141.746	-1.18542	0.000353704	133.582	-2.0722	8.57933e-12	122.597	-1.97467	5.06898e-10
CD93_NM_012072	CD93	NM_012072	ENSG00000125810	128.405	-0.665038	0.0540574	73.2362	-0.63112	NA	85.074	-1.92091	4.56725e-07	51.3315	-1.40226	0.00118707	77.6498	-2.63138	8.57933e-12	48.8062	-1.66425	0.000173214
CCR2_NM_001123041	CCR2	NM_001123041	ENSG00000121807	133.237	-0.900322	0.0190152	212.646	-0.745926	0.0389056	98.44	-1.71969	1.69311e-05	141.906	-1.92015	1.44077e-08	86.9722	-2.65998	3.299e-11	130.475	-2.61212	6.88639e-16
CBFA2T3_NM_005187	CBFA2T3	NM_005187	ENSG00000129993	175.799	-0.589351	0.0581549	133.572	-0.443729	0.13943	120.619	-1.56529	1.07783e-05	95.2915	-1.07149	0.0027091	109.226	-2.17431	5.33429e-11	84.0824	-1.65271	3.27423e-06
ATP8B4_NR_073598	ATP8B4	NR_073598	ENSG00000104043	236.038	-0.189183	0.387637	411.34	-0.254718	0.254623	168.681	-0.801835	0.0238571	274.527	-1.10502	8.45783e-05	128.757	-2.13772	6.48658e-11	229.577	-2.07162	9.41583e-16
LOC101926963_NR_110054	LOC101926963	NR_110054	N/A	138.156	-0.682915	0.0472505	196.757	-0.670109	0.0389056	96.6711	-1.62709	1.26879e-05	132.426	-1.71692	4.14158e-08	84.2696	-2.53421	7.5584e-11	120.9	-2.34718	7.24822e-14
MIR4736_NR_039889	MIR4736	NR_039889	ENSG00000264399	189.991	-0.713091	0.025459	177.353	-0.417004	0.148317	145.717	-1.21712	0.000252221	119.52	-1.29193	0.000128251	125.93	-1.99026	1.24858e-10	105.196	-1.98631	1.7634e-09
ZSCAN31_NM_001243241	ZSCAN31	NM_001243241	ENSG00000235109	164.775	-0.757837	0.0322803	113.104	-0.479478	0.143826	119.09	-1.61293	1.69311e-05	87.4842	-0.825296	0.0316297	108.281	-2.21864	2.82164e-10	73.0246	-1.62311	3.33862e-05
LTC4S_NM_145867	LTC4S	NM_145867	ENSG00000213316	143.148	-0.798478	0.0190152	65.7455	-0.556975	NA	102.967	-1.64882	7.51774e-06	48.2345	-1.08734	0.0143297	94.337	-2.2014	3.05417e-10	50.8613	-0.925505	0.0346198
MIR3154_NR_036110	MIR3154	NR_036110	ENSG00000264823	102.448	-0.964443	0.00918904	50.0908	-0.587106	NA	74.8468	-1.85475	4.88038e-06	39.1739	-0.894944	0.0500947	68.1138	-2.53089	3.79322e-10	38.2857	-1.01291	0.0349398
BRE_NM_001261840	BRE	NM_001261840	ENSG00000158019	206.473	-0.473796	0.0801715	136.72	-0.642834	0.0665994	148.233	-1.18508	0.000472346	98.8209	-1.30308	0.000292379	127.737	-1.95766	3.87026e-10	89.1537	-1.86761	5.81037e-07
LINC-ROR_NR_048536	LINC-ROR	NR_048536	ENSG00000258609	107.725	-1.12559	0.00114908	69.9187	-1.36331	NA	76.7341	-2.3377	5.01588e-09	56.5989	-1.73339	2.91545e-05	75.9841	-2.38688	4.13606e-10	53.2743	-2.17375	4.89405e-07
DENND2D_NM_024901	DENND2D	NM_024901	ENSG00000162777	138.718	-0.646115	0.0581549	162.349	-0.61271	0.056857	96.598	-1.59698	1.682e-05	100.496	-2.14936	1.74429e-10	87.0521	-2.24526	5.07658e-10	97.631	-2.34094	6.92386e-12
OCSTAMP_NM_080721	OCSTAMP	NM_080721	ENSG00000149635	136.153	-0.592829	0.0656974	144.441	-0.542053	0.172135	90.993	-1.70574	1.25677e-05	101.182	-1.54806	7.10682e-06	84.3878	-2.22273	9.4495e-10	94.2956	-1.90259	1.78403e-07
MPG_NM_001015052	MPG	NM_001015052	ENSG00000103152	99.5336	-0.88246	0.0190152	49.2137	-0.345916	NA	73.1485	-1.68621	2.37315e-05	37.1383	-0.725001	NA	65.1323	-2.49384	9.76199e-10	36.3346	-0.794095	0.105672
MPO_NM_000250	MPO	NM_000250	ENSG00000005381	118.406	-0.701463	0.0510448	155.234	-0.515409	0.106884	86.0064	-1.45636	0.000147174	102.546	-1.50678	4.10822e-05	74.8052	-2.34162	1.25212e-09	93.3638	-2.09391	1.7634e-09
TXNRD2_NM_001282512	TXNRD2	NM_001282512	ENSG00000184470	167.941	-0.740891	0.025459	109.985	-0.64417	0.0726801	118.744	-1.67822	1.03664e-06	82.6937	-1.11422	0.00357656	112.48	-1.96408	1.53431e-09	72.6805	-1.77032	2.90008e-06
IL2RG_NM_000206	IL2RG	NM_000206	ENSG00000147168	101.979	-0.631301	0.0712164	91.3859	-0.809006	0.0389056	67.3908	-1.92598	8.11331e-06	68.1958	-1.40413	0.000395425	61.9366	-2.56612	1.82246e-09	56.4452	-2.74451	3.00293e-10
CIB3_NM_001300922	CIB3	NM_001300922	ENSG00000141977	155.255	-0.754485	0.0260073	213.924	-0.851302	0.010792	104.649	-1.98127	3.80892e-08	145.641	-1.95999	3.34752e-10	103.627	-2.0115	3.77921e-09	141.791	-2.12767	4.08426e-12
SFMBT2_NM_001018039	SFMBT2	NM_001018039	ENSG00000198879	275.905	-0.250916	0.270972	233.491	-0.260667	0.288793	195.447	-0.923841	0.0033187	161.915	-0.934126	0.00253045	165.775	-1.66536	4.66178e-09	142.893	-1.45774	1.81207e-06
LOC100996455_NR_073177	LOC100996455	NR_073177	ENSG00000181908	138.907	-0.674529	0.047462	71.6163	-0.666045	NA	97.5588	-1.58912	1.8648e-05	52.7469	-1.23664	0.00368703	89.3923	-2.11002	4.96371e-09	49.4751	-1.54958	0.000347225
LMO2_NM_005574	LMO2	NM_005574	ENSG00000135363	200.965	-0.437237	0.104954	146.263	-0.245193	0.359362	145.397	-1.09735	0.00134685	105.625	-0.760216	0.0301603	124.186	-1.86684	6.18189e-09	87.0791	-1.58026	7.22692e-06
CCR5_NM_000579	CCR5	NM_000579	ENSG00000160791	121.467	-0.8762	0.0240935	84.6788	-0.581264	0.163185	91.8299	-1.5527	0.00012691	60.9088	-1.53441	0.000616374	82.2688	-2.23967	6.62585e-09	57.3851	-1.92759	2.42995e-05
LINC01063_NR_132101	LINC01063	NR_132101	ENSG00000232065	198.263	-0.349992	0.149499	212.001	-0.430885	0.129967	138.525	-1.12024	0.00144038	140.722	-1.38812	1.75214e-05	119.882	-1.83136	7.05289e-09	124.663	-2.10136	2.24782e-11
MYO1G_NM_033054	MYO1G	NM_033054	ENSG00000136286	151.77	-0.450138	0.116843	141.595	-0.233686	0.483983	103.866	-1.36667	0.000169325	106.177	-0.693083	0.0440949	91.9969	-2.02191	1.10342e-08	87.3065	-1.46574	6.20414e-05
P2RY2_NM_002564	P2RY2	NM_002564	ENSG00000175591	155.515	-0.613209	0.0581549	83.2777	-0.385486	0.225913	112.641	-1.34077	0.000151	61.8501	-0.839228	0.0356392	100.513	-1.93695	1.20442e-08	53.5558	-1.42354	0.000831423
SMIM3_NM_032947	SMIM3	NM_032947	ENSG00000256235	279.417	-0.257528	0.243567	348.863	-0.145606	0.46672	213.053	-0.661008	0.0459252	255.933	-0.589898	0.0420977	168.555	-1.6602	1.51535e-08	216.62	-1.22204	1.64984e-06
EXOC3_NM_007277	EXOC3	NM_007277	ENSG00000180104	170.549	-0.284878	0.250959	110.178	-0.125622	0.636274	114.378	-1.18432	0.00106802	71.1652	-0.973703	0.0149301	98.5247	-1.95636	1.65036e-08	61.9046	-1.5953	0.000106361
LINC00211_NR_110011	LINC00211	NR_110011	ENSG00000237803	97.6986	-0.94431	0.0147139	70.4216	-0.777345	NA	79.5414	-1.23439	0.00216761	51.634	-1.41336	0.00106076	66.5302	-2.2681	1.65503e-08	46.202	-2.06011	5.48088e-06
IRF5_NM_001098627	IRF5	NM_001098627	ENSG00000128604	104.162	-0.677766	0.0581549	88.8789	-0.590213	0.100914	77.1881	-1.32748	0.000925556	72.9737	-0.734534	0.0558812	65.219	-2.32225	1.84873e-08	62.9738	-1.31537	0.00116588
ARHGDIA_NM_001185078	ARHGDIA	NM_001185078	ENSG00000141522	153.969	-0.674051	0.0381856	57.6787	-0.397244	NA	110.812	-1.45928	3.44943e-05	43.9996	-0.759041	0.0804945	102.123	-1.88852	2.06286e-08	42.3495	-0.895258	0.0547766
LPPR3_NM_001270366	LPPR3	NM_001270366	ENSG00000129951	157.678	-0.323869	0.192144	103.379	-0.25525	0.370685	104.971	-1.29523	0.000447872	75.2941	-0.732324	0.0517557	92.589	-1.97778	2.99456e-08	60.1144	-1.69355	4.35554e-05
GPR35_NM_005301	GPR35	NM_005301	ENSG00000178623	116.039	-0.727715	0.0391157	59.1067	-0.395847	NA	82.8958	-1.56808	6.90849e-05	42.9523	-0.8837	0.0517557	76.1424	-2.10522	2.99456e-08	38.5914	-1.38578	0.00372277
PTPN3_NR_026918	PTPN3	NR_026918	N/A	125.727	-0.79678	0.0264836	161.174	-0.512353	0.109542	90.0969	-1.67921	1.28579e-05	114.65	-1.1954	0.00110435	83.0403	-2.15703	2.99456e-08	99.9933	-1.73059	0.00103767
ZSCAN31_NM_001135216	ZSCAN31	NM_001135216	ENSG00000235109	165.254	-0.595131	0.0656974	86.487	-0.523744	0.139114	119.999	-1.32792	0.000752825	67.485	-0.854429	0.034896	107.039	-1.96395	3.00406e-08	59.7679	-1.37227	0.00112361
CTDSP1_NM_021198	CTDSP1	NM_021198	ENSG00000144579	179.228	-0.308531	0.207989	63.4588	-0.400124	NA	122.342	-1.15042	0.00102009	43.2913	-1.12096	0.0160084	107.093	-1.81407	3.49685e-08	42.8778	-1.23537	0.00762253
P2RY2_NM_176071	P2RY2	NM_176071	ENSG00000175591	143.947	-0.560303	0.0656974	88.0356	-0.292288	0.32708	103.511	-1.29501	0.000401842	63.8939	-0.798767	0.0427182	91.619	-1.93067	4.55491e-08	55.4344	-1.36882	0.00108355
LINC01132_NR_038856	LINC01132	NR_038856	ENSG00000227630	157.492	-0.477575	0.104195	201.597	-0.666538	0.0389056	109.747	-1.32558	0.000447872	143.277	-1.41653	9.67741e-06	97.9299	-1.9437	4.64107e-08	126.086	-2.19881	7.66557e-13
RBKS_NM_001287580	RBKS	NM_001287580	ENSG00000171174	146.467	-0.588151	0.0604985	210.166	-0.455412	0.122616	104.779	-1.36323	0.000166637	148.748	-1.1333	0.000832829	94.7011	-1.9089	6.04813e-08	128.163	-1.91694	1.23316e-09
ASGR2_NM_001181	ASGR2	NM_001181	ENSG00000161944	114.982	-0.800833	0.0276981	141.525	-0.772291	0.0389056	85.3028	-1.49248	0.0001498	95.3329	-1.88632	4.14158e-08	77.7941	-2.04341	6.1838e-08	93.3508	-1.96282	7.79122e-08
CLEC11A_NM_002975	CLEC11A	NM_002975	ENSG00000105472	135.567	-0.631034	0.0581549	166.615	-0.478962	0.106599	98.0516	-1.37719	0.000206483	110.233	-1.45852	1.95997e-05	86.7307	-2.02066	6.61764e-08	106.613	-1.63096	4.61475e-07
MIR199B_NR_029619	MIR199B	NR_029619	ENSG00000207581	87.7916	-0.944129	0.0188093	50.2321	-0.501928	NA	63.9927	-1.84265	1.28895e-05	38.2572	-0.882361	NA	60.2702	-2.23355	8.45715e-08	38.3525	-0.912954	0.0639966
PLAU_NM_001145031	PLAU	NM_001145031	ENSG00000122861	150.265	-0.606058	0.0583325	109.616	-0.369702	0.22139	111.724	-1.21613	0.00120683	88.8514	-0.517958	0.147944	97.3602	-1.90833	8.95484e-08	75.9133	-1.07609	0.00452563
HSH2D_NM_001291274	HSH2D	NM_001291274	ENSG00000196684	160.483	-0.688293	0.0353519	177.092	-0.604744	0.0665981	116.131	-1.45438	3.22865e-05	120.699	-1.54347	5.64892e-06	106.122	-1.90368	1.12089e-07	115.477	-1.79385	3.60723e-08
LOC339862_NM_001257177	LOC339862	NM_001257177	N/A	394.452	-0.267115	0.204812	382.645	-0.204107	0.379204	300.585	-0.669623	0.0472905	288.1	-0.459541	0.348043	248.747	-1.44908	1.44935e-07	240.172	-1.28132	4.93005e-06
ERCC1_NM_202001	ERCC1	NM_202001	ENSG00000012061	122.288	-0.615069	0.0601528	49.5143	-0.306663	NA	87.916	-1.37902	0.000328939	41.9252	-0.328326	0.437239	77.5595	-2.04831	1.51379e-07	44.6182	-0.137142	0.773957
SRGN_NM_002727	SRGN	NM_002727	ENSG00000122862	139.435	-0.412945	0.130676	90.5437	-0.320469	0.308678	102.874	-0.986365	0.00754918	71.088	-0.582608	0.137206	85.3271	-1.90873	1.52927e-07	59.8871	-1.21025	0.00487074
UCN2_NM_033199	UCN2	NM_033199	ENSG00000145040	91.8749	-0.642193	0.0656974	88.806	-0.570324	0.114647	61.0777	-1.8308	1.69311e-05	65.4312	-1.10863	0.005422	57.7808	-2.20917	1.85768e-07	58.6399	-1.61787	7.92936e-05
C9orf47_NM_001001938	C9orf47	NM_001001938	ENSG00000186354	94.2262	-0.839318	0.0276981	57.785	-0.643187	NA	69.0689	-1.62538	6.73788e-05	41.6661	-1.30874	0.00410375	63.7462	-2.10659	1.97953e-07	41.3971	-1.33264	0.00461767
HNRNPL_NM_001005335	HNRNPL	NM_001005335	ENSG00000104824	133.983	-0.623369	0.0581549	98.7297	-0.659045	0.0726801	102.038	-1.14055	0.00216862	70.7299	-1.36596	0.000423381	86.4465	-1.95749	2.35144e-07	65.0974	-1.77067	1.19679e-05
MIR4710_NR_039860	MIR4710	NR_039860	ENSG00000265291	97.9099	-0.714854	0.0581549	79.5286	-0.564564	0.130235	73.0557	-1.35675	0.000760713	56.7518	-1.23117	0.00368703	64.1665	-2.07952	2.76798e-07	54.0429	-1.46619	0.000605688
ADCK3_NM_020247	ADCK3	NM_020247	ENSG00000163050	112.577	-0.541023	0.0831435	48.1833	-0.173488	NA	77.3605	-1.49056	0.000199866	38.88	-0.303247	0.478478	70.8273	-1.99194	2.88217e-07	33.736	-0.709712	0.160713
ERCC1_NM_001166049	ERCC1	NM_001166049	ENSG00000012061	130.303	-0.561678	0.0690665	71.3877	-0.331027	NA	98.22	-1.09285	0.00385057	51.1295	-0.881491	0.0383147	83.4552	-1.88675	2.92843e-07	52.9672	-0.749387	0.086046
ZMYND8_NM_001281769	ZMYND8	NM_001281769	N/A	215.921	-0.383352	0.120116	138.416	-0.465685	0.138458	154.158	-1.06544	0.00346426	109.169	-0.72291	0.0496957	138.508	-1.55919	3.4557e-07	87.714	-1.6896	2.93794e-06
NRON_NR_045006	NRON	NR_045006	N/A	105.572	-1.02798	0.00537852	93.3291	-0.843088	0.0389056	80.2189	-1.7087	1.25677e-05	66.1774	-1.70333	1.49821e-05	76.9537	-1.95906	3.89105e-07	62.9978	-2.02302	3.3861e-07
ASGR2_NM_080914	ASGR2	NM_080914	ENSG00000161944	113.167	-0.790107	0.0281225	110.175	-0.811271	0.0389056	78.8065	-1.82793	4.9596e-06	82.9009	-1.35462	0.000244241	75.6657	-2.04094	4.18307e-07	78.104	-1.62462	1.60462e-05
CMAHP_NR_002174	CMAHP	NR_002174	ENSG00000168405	109.677	-0.591034	0.0874569	82.2835	-0.571609	0.126335	84.7774	-1.04066	0.0169636	60.7487	-1.14162	0.00750151	68.6522	-2.19117	4.18307e-07	55.5987	-1.58574	0.000402036
MAP1LC3B2_NM_001085481	MAP1LC3B2	NM_001085481	ENSG00000258102	189.838	-0.545577	0.0648101	90.7279	-0.284029	0.339365	136.954	-1.26877	0.000275864	72.6022	-0.46762	0.21034	127.012	-1.61912	4.30893e-07	57.4871	-1.31667	0.00138227
S100B_NM_006272	S100B	NM_006272	ENSG00000160307	144.34	-0.813178	0.0190152	54.573	-0.500165	NA	103.475	-1.72005	1.55045e-06	40.5289	-0.978236	0.0309173	102.068	-1.73849	4.30893e-07	37.2337	-1.36621	0.00492253
CNTRL_NM_007018	CNTRL	NM_007018	ENSG00000119397	88.4792	-0.722613	0.0581549	59.2854	-0.615172	NA	66.2635	-1.35254	0.00145959	46.5651	-0.944848	0.0360438	57.6802	-2.14884	4.30893e-07	42.013	-1.40188	0.00355768
RCSD1_NM_052862	RCSD1	NM_052862	ENSG00000198771	124.207	-0.426397	0.131329	143.488	-0.331904	0.231401	87.892	-1.16771	0.0026923	106.602	-0.770172	0.0288707	75.9199	-1.94153	5.33099e-07	91.4749	-1.3552	0.000188941
ZEB2-AS1_NR_040248	ZEB2-AS1	NR_040248	ENSG00000238057	248.464	-0.253682	0.276955	200.744	-0.141089	0.557558	188.672	-0.669731	0.059564	141.902	-0.703976	0.0443967	152.038	-1.57982	5.33099e-07	126.495	-1.14366	0.000664309
FAM129C_NM_001098524	FAM129C	NM_001098524	ENSG00000167483	180.696	-0.69566	0.0311815	192.883	-0.43234	0.128893	131.693	-1.44095	2.48965e-05	142.398	-0.925238	0.00400546	126.861	-1.59763	5.36504e-07	124.021	-1.53145	5.81121e-07
TIFAB_NM_001099221	TIFAB	NM_001099221	ENSG00000255833	142.558	-0.3993	0.141317	212.439	-0.371884	0.15478	96.7961	-1.31795	0.000472346	147.018	-1.10789	0.000494097	88.4977	-1.76741	5.88032e-07	120.979	-2.20713	1.62411e-12
TPRG1-AS1_NR_046873	TPRG1-AS1	NR_046873	ENSG00000234076	102.725	-0.670327	0.0581549	96.437	-0.837434	0.0389056	73.365	-1.48468	0.000286771	74.1918	-1.2654	0.00113327	67.5282	-1.97715	6.24348e-07	69.0646	-1.65328	1.4513e-05
TMEM238_NM_001190764	TMEM238	NM_001190764	ENSG00000233493	147.063	-0.793187	0.0190152	63.8921	-0.413566	NA	108.032	-1.53098	1.69311e-05	48.725	-0.783453	0.065455	103.832	-1.7032	6.301e-07	48.1897	-0.796569	0.0769203
HIST1H4L_NM_003546	HIST1H4L	NM_003546	ENSG00000275126	191.996	-0.634961	0.0992919	148.503	-0.529357	0.106541	157.548	-0.965175	0.0125396	120.632	-0.700371	0.0526671	134.368	-1.70716	8.39507e-07	112.904	-0.938315	0.00869709
MBP_NM_001025100	MBP	NM_001025100	ENSG00000197971	155.455	-0.520058	0.0882501	155.948	-0.448705	0.130235	111.925	-1.23803	0.000520699	110.142	-1.12171	0.000969203	101.619	-1.68244	8.42472e-07	95.0153	-1.86655	3.14915e-08
FCER2_NM_001220500	FCER2	NM_001220500	ENSG00000104921	146.414	-0.692285	0.0437233	130.042	-0.516475	0.103304	109.649	-1.29442	0.000659906	102.172	-0.794722	0.0228511	100.152	-1.75	8.42472e-07	91.8319	-1.21209	0.000392077
MUC1_NM_001018016	MUC1	NM_001018016	ENSG00000185499	102.433	-0.632433	0.0687432	81.5211	-0.512817	0.148017	76.558	-1.22336	0.00268752	60.3234	-0.996956	0.0173353	66.4849	-1.97366	8.7819e-07	59.3158	-1.0591	0.0122486
HPS4_NM_152841	HPS4	NM_152841	ENSG00000100099	116.782	-0.667437	0.0581549	80.3929	-0.66354	0.0842261	84.7193	-1.42495	0.000328939	60.6758	-1.13771	0.0104972	76.9535	-1.96718	8.7819e-07	55.5157	-1.58694	0.000166966
ACTB_NM_001101	ACTB	NM_001101	ENSG00000075624	127.07	-0.535242	0.0795797	62.531	-0.0532604	NA	86.5985	-1.51688	6.9473e-05	48.453	-0.282406	0.485594	81.6126	-1.81678	8.7819e-07	49.6444	-0.185082	0.685833
ZMYND11_NM_001202465	ZMYND11	NM_001202465	ENSG00000015171	250.574	-0.360572	0.142684	197.749	-0.149865	0.509532	177.91	-1.07235	0.00142201	140.185	-0.704142	0.0279988	162.187	-1.4743	9.07346e-07	122.073	-1.23391	6.30759e-05
ZMYND11_NM_006624	ZMYND11	NM_006624	ENSG00000015171	246.167	-0.357319	0.145693	201.377	-0.144609	0.517859	175.249	-1.05646	0.0016909	143.05	-0.690368	0.0294347	159	-1.47927	9.22471e-07	124.539	-1.21479	7.5747e-05
ST3GAL4_NM_001254757	ST3GAL4	NM_001254757	ENSG00000110080	113.558	-0.495492	0.105175	75.0501	-0.39366	NA	81.8759	-1.18354	0.00260274	49.5038	-1.31907	0.00253045	71.3514	-1.89498	9.22471e-07	50.3635	-1.21533	0.00695448
LOC728743_NR_027237	LOC728743	NR_027237	N/A	103.913	-0.647798	0.0601528	86.5861	-0.5545	0.114996	74.1128	-1.47727	0.00038426	67.141	-0.877909	0.0280696	68.1641	-1.93971	9.22471e-07	61.11	-1.23825	0.00313496
ZNF516_NM_014643	ZNF516	NM_014643	ENSG00000101493	120.174	-0.580058	0.0756418	81.9061	-0.320466	0.303936	89.778	-1.15647	0.00273164	57.2132	-0.969599	0.0200555	78.0869	-1.84767	9.24554e-07	52.1212	-1.38083	0.00133348
USP4_NM_001251877	USP4	NM_001251877	ENSG00000114316	144.169	-0.591934	0.0601528	57.1374	-0.144543	NA	106.491	-1.21712	0.000758574	42.7665	-0.481956	0.253323	96.125	-1.69378	1.02834e-06	38.9969	-0.716034	0.163871
MIR4513_NR_039738	MIR4513	NR_039738	ENSG00000264386	153.385	-0.644106	0.0581549	124.58	-0.662781	0.055684	108.676	-1.50977	4.47894e-05	92.4278	-1.20917	0.00092913	103.237	-1.74608	1.07565e-06	86.0957	-1.54476	9.04308e-06
TMEM206_NM_001198862	TMEM206	NM_001198862	ENSG00000065600	96.1409	-0.855262	0.0264836	34.3965	-0.102516	NA	73.1716	-1.44655	0.000401842	33.2663	0.186369	NA	66.6601	-1.95498	1.23918e-06	28.7071	-0.114393	0.839534
ZNF574_NM_022752	ZNF574	NM_022752	ENSG00000105732	118.331	-0.626158	0.0587199	52.8572	-0.0993926	NA	90.6362	-1.11095	0.00507339	41.1284	-0.317291	0.454631	78.0569	-1.83072	1.26363e-06	36.6288	-0.62391	0.21289
CMAHP_NR_027626	CMAHP	NR_027626	N/A	102.985	-0.762856	0.0581549	89.0706	-0.585603	0.119683	81.2284	-1.2056	0.00473481	71.77	-0.668654	0.20176	69.1755	-2.1029	1.28998e-06	55.5491	-2.09777	3.78524e-06
CYB561_NM_001915	CYB561	NM_001915	ENSG00000008283	118.814	-0.55858	0.0753713	29.2006	-0.378346	NA	80.7149	-1.57958	5.31586e-05	24.5541	-0.448169	NA	75.9034	-1.88234	1.36503e-06	21.1395	-0.912162	NA
TRPM2_NM_003307	TRPM2	NM_003307	ENSG00000142185	116.896	-0.741904	0.0329803	183.973	-0.700666	0.0389056	87.1145	-1.39574	0.000286771	129.186	-1.53346	1.58021e-06	80.3836	-1.79049	1.3842e-06	116.416	-2.17577	3.06097e-12
MAT2A_NM_005911	MAT2A	NM_005911	ENSG00000168906	176.599	-0.589743	0.0581549	77.8413	-0.441117	0.186974	130.881	-1.20008	0.000760713	61.7655	-0.673381	0.0850439	121.75	-1.51202	1.61965e-06	56.7677	-0.966721	0.0205143
BRE-AS1_NR_028308	BRE-AS1	NR_028308	N/A	121.646	-0.692524	0.0581549	170.237	-0.497918	0.0960086	88.6667	-1.43792	0.000338793	122.087	-1.13036	0.000628052	81.1136	-1.93594	1.73745e-06	106.221	-1.8407	9.45776e-09
PARVG_NM_022141	PARVG	NM_022141	ENSG00000138964	111.498	-0.817756	0.0260073	132.8	-0.437329	0.163111	82.3074	-1.53324	0.000111963	88.6475	-1.36456	0.00016834	77.6679	-1.83044	1.93168e-06	85.0923	-1.56891	7.14586e-06
MS4A6A_NM_001247999	MS4A6A	NM_001247999	ENSG00000110077	143.132	-0.507924	0.105175	236.584	-0.603166	0.0638727	102.655	-1.24946	0.00262852	161.088	-1.55629	3.34239e-06	92.6168	-1.78426	1.94222e-06	143.141	-2.35792	1.16253e-13
PRR14_NM_024031	PRR14	NM_024031	ENSG00000156858	90.4117	-0.79797	0.0398384	55.1092	-0.507097	NA	73.8844	-1.05242	0.0109234	45.1608	-0.648869	0.129522	61.4742	-1.97924	1.94222e-06	41.6123	-0.933426	0.0472011
AZU1_NM_001700	AZU1	NM_001700	ENSG00000172232	158.237	-0.408858	0.128185	195.358	-0.358663	0.177504	111.309	-1.176	0.00135247	149.018	-0.709723	0.0249465	97.9088	-1.76372	1.94222e-06	129.349	-1.26202	3.4445e-05
TMEM206_NM_018252	TMEM206	NM_018252	ENSG00000065600	97.9808	-0.892259	0.0190152	33.1828	-0.0950197	NA	75.3476	-1.446	0.000338793	32.0713	0.190714	NA	69.336	-1.88274	2.11568e-06	27.7674	-0.0969914	0.864711
HOXC6_NM_004503	HOXC6	NM_004503	ENSG00000197757	91.8607	-0.560151	0.10073	42.3924	-0.254619	NA	66.9778	-1.23678	0.00421935	33.1327	-0.497806	NA	57.3748	-2.08616	2.11568e-06	29.9034	-0.808181	0.126463
PRSS57_NM_001308209	PRSS57	NM_001308209	ENSG00000185198	167.76	-0.608965	0.0581549	178.423	-0.639706	0.0534516	124.906	-1.20977	0.000528922	131.177	-1.2281	0.000183826	116.451	-1.51173	2.14342e-06	114.28	-1.98624	4.17976e-10
LINC00656_NR_034149	LINC00656	NR_034149	ENSG00000233746	107.146	-0.644518	0.0603471	84.3473	-0.675998	0.0774937	78.5608	-1.32932	0.000760713	61.6664	-1.29608	0.00169403	70.3404	-1.88031	2.25443e-06	57.5401	-1.65966	6.27306e-05
CPQ_NM_016134	CPQ	NM_016134	ENSG00000104324	150.926	-0.719623	0.0315081	91.4931	-0.545842	0.119683	116.47	-1.21043	0.000659906	76.0839	-0.651059	0.0817883	104.397	-1.69988	2.25443e-06	70.2662	-0.934367	0.018916
SFMBT2_NM_001029880	SFMBT2	NM_001029880	ENSG00000198879	282.158	-0.162363	0.425775	240.91	-0.217445	0.381545	195.176	-0.89729	0.00395781	165.754	-0.91622	0.00262934	169.562	-1.46332	2.36981e-06	148.442	-1.37333	1.37985e-06
FTL_NM_000146	FTL	NM_000146	ENSG00000087086	129.204	-0.433939	0.121812	83.1601	-0.223515	0.436037	86.8808	-1.41087	0.000255003	67.1202	-0.345268	0.371707	81.8493	-1.71463	2.38324e-06	70.1643	-0.20668	0.602597
EGOT_NR_004428	EGOT	NR_004428	ENSG00000235947	105.149	-0.626976	0.0656974	108.768	-0.777517	0.0467468	77.569	-1.28672	0.00173818	79.8187	-1.42329	0.000292379	69.1204	-1.89182	2.38324e-06	70.2216	-2.23475	2.67858e-08
UHRF2_NM_152896	UHRF2	NM_152896	ENSG00000147854	150.082	-0.302291	0.243306	64.7808	-0.187004	NA	113.265	-0.748034	0.0642739	52.857	-0.302543	0.441154	90.7028	-1.73993	2.74e-06	49.2216	-0.513794	0.251308
HIST1H4E_NM_003545	HIST1H4E	NM_003545	ENSG00000276966	162.932	-0.631563	0.0612912	135.382	-0.61464	0.0797065	121.967	-0.995851	0.0857481	119.946	-0.437993	0.352075	111.057	-1.69356	2.79253e-06	113.559	-0.676859	0.0565537
IL23A_NM_016584	IL23A	NM_016584	ENSG00000110944	77.8103	-0.74815	0.0583325	56.7086	-0.78072	NA	56.3706	-1.56843	0.000401842	45.309	-1.06816	0.0160423	51.7802	-2.07383	3.07961e-06	46.718	-0.969369	0.0303805
MRC2_NM_006039	MRC2	NM_006039	ENSG00000011028	94.8217	-0.724659	0.053241	89.0713	-0.46293	0.163185	69.947	-1.40078	0.000804025	65.6574	-0.954917	0.0163347	63.1463	-1.94889	3.28127e-06	56.0732	-1.69772	3.92235e-05
DOK3_NM_001308236	DOK3	NM_001308236	ENSG00000146094	99.0743	-0.614065	0.0717789	119.075	-0.529297	0.103855	70.1996	-1.40805	0.00119284	84.3453	-1.21172	0.00114617	64.0157	-1.92787	3.28127e-06	78.0012	-1.58175	1.81825e-05
TRIM13_NM_001007278	TRIM13	NM_001007278	ENSG00000204977	151.964	-0.431446	0.115527	96.6231	-0.355151	0.261162	114.469	-0.929315	0.0105356	69.1832	-0.924999	0.0175984	96.9298	-1.69159	3.35351e-06	65.7366	-1.13528	0.00368599
RASGRP2_NM_001098670	RASGRP2	NM_001098670	ENSG00000068831	112.927	-0.637528	0.0596121	105.513	-0.311961	0.283883	82.6422	-1.32681	0.000659906	77.2124	-0.796763	0.0334476	76.1616	-1.73208	3.57745e-06	73.026	-0.99787	0.00803368
PPP1R27_NM_001007533	PPP1R27	NM_001007533	ENSG00000182676	175.335	-0.360986	0.154767	174.116	-0.383743	0.167981	126.851	-0.98705	0.00502233	127.539	-0.880418	0.0103536	112.178	-1.50911	3.72202e-06	117.606	-1.22098	0.000147841
CD27-AS1_NR_015382	CD27-AS1	NR_015382	ENSG00000215039	137.334	-0.599125	0.0601513	72.0518	-0.20119	NA	104.001	-1.13048	0.00211745	48.9707	-0.897552	0.0362431	93.3198	-1.61524	3.74986e-06	47.7131	-0.947449	0.0425217
GNAI2_NM_001282617	GNAI2	NM_001282617	ENSG00000114353	91.8587	-0.835467	0.0298737	53.1824	-0.478282	NA	68.9603	-1.49786	0.000299686	43.0845	-0.666363	0.125239	63.5772	-1.91898	3.90858e-06	39.0257	-0.992502	0.0383159
FBXL5_NM_001193534	FBXL5	NM_001193534	ENSG00000118564	95.7184	-0.681028	0.0581549	53.5034	-0.19009	NA	74.9093	-1.0915	0.00754918	44.9791	-0.228229	0.578562	64.2935	-1.86326	3.9727e-06	40.3051	-0.538293	0.258944
CXorf65_NM_001025265	CXorf65	NM_001025265	ENSG00000204165	75.8516	-0.431591	0.170455	55.8762	-0.602573	NA	51.7844	-1.34453	0.00403389	39.3551	-1.3638	0.00356455	44.6272	-2.20986	3.9727e-06	35.3502	-2.00186	5.88338e-05
C20orf197_NM_001302813	C20orf197	NM_001302813	ENSG00000176659	98.959	-0.689306	0.0581549	170.117	-0.577933	0.0727512	73.3637	-1.33922	0.00113346	116.433	-1.46598	9.2672e-06	66.6179	-1.85132	4.06802e-06	104.16	-2.10983	3.68077e-10
RASSF1_NM_170712	RASSF1	NM_170712	ENSG00000068028	157.327	-0.34898	0.164107	90.4912	-0.502859	0.138458	111.386	-1.06154	0.00317791	67.8485	-0.942048	0.0173442	99.6842	-1.55476	4.06802e-06	62.3768	-1.29882	0.00108092
FKBP5_NM_001145775	FKBP5	NM_001145775	ENSG00000096060	102.922	-0.659474	0.0587199	94.9154	-0.706257	0.056857	73.3236	-1.48058	0.000286771	68.0739	-1.43195	0.000284165	69.2239	-1.79122	4.18555e-06	66.1162	-1.58703	4.49879e-05
ENO1_NM_001428	ENO1	NM_001428	ENSG00000074800	121.056	-0.466078	0.116911	107.655	-0.38307	0.203371	86.9124	-1.15416	0.00303853	79.2821	-0.846342	0.0270373	75.2605	-1.84153	4.31826e-06	72.3581	-1.19274	0.00224493
LOC101927497_NR_110086	LOC101927497	NR_110086	N/A	251.231	-0.00739638	0.974208	184.502	-0.0632076	0.783529	190.529	-0.371898	0.239694	139.63	-0.383621	0.248057	145.173	-1.38436	4.31826e-06	111.406	-1.19402	0.000357964
PILRA_NM_013439	PILRA	NM_013439	ENSG00000085514	96.0996	-0.775653	0.0398384	41.4786	-0.261399	NA	67.8331	-1.7369	3.22865e-05	29.9175	-0.720729	NA	65.2454	-1.92541	4.31826e-06	33.4407	-0.415366	0.414212
MADD_NM_130470	MADD	NM_130470	ENSG00000110514	110.871	-0.70068	0.0502839	60.0938	-0.271814	NA	81.9293	-1.37722	0.000449237	46.5077	-0.567769	0.192748	76.3245	-1.74028	4.35772e-06	39.0901	-1.19792	0.0153553
LAT_NM_001014987	LAT	NM_001014987	ENSG00000213658	140.799	-0.569661	0.0656974	64.4492	-0.656272	NA	98.6633	-1.4353	9.08702e-05	50.0947	-1.01151	0.022001	94.3559	-1.61931	4.35772e-06	51.5876	-0.900713	0.0437261
EFCAB2_NM_001143943	EFCAB2	NM_001143943	ENSG00000203666	228.527	-0.429311	0.10073	156.66	-0.27577	0.296742	175.964	-0.837006	0.0180368	120.188	-0.591058	0.0811526	154.311	-1.37969	4.44044e-06	108.123	-0.963044	0.00368599
PDE3B_NM_000922	PDE3B	NM_000922	ENSG00000152270	130.222	-0.459741	0.115233	129.507	-0.38097	0.188603	101.962	-0.814118	0.0366591	98.5002	-0.745607	0.031992	82.7636	-1.72919	4.44224e-06	88.1612	-1.15364	0.0010397
HOXC10_NM_017409	HOXC10	NM_017409	ENSG00000180818	76.144	-0.562505	0.10073	36.5329	-0.39101	NA	50.6445	-1.67358	0.000226118	27.2585	-0.824938	NA	46.7281	-2.1444	4.6426e-06	27.8283	-0.753683	0.171794
CCR1_NM_001295	CCR1	NM_001295	ENSG00000163823	107.708	-0.598482	0.0656974	142.6	-0.399805	0.297767	80.8634	-1.16419	0.00322592	104.738	-0.865458	0.103365	71.377	-1.75987	4.7025e-06	88.2755	-1.82018	0.000688249
GTF3C6_NM_138408	GTF3C6	NM_138408	ENSG00000155115	97.5863	-0.635625	0.0648101	99.053	-0.370413	0.226705	70.2167	-1.41653	0.000727829	69.5897	-1.03292	0.0095114	64.8167	-1.8421	4.7025e-06	62.498	-1.48765	0.000290866
ACBD5_NM_001271512	ACBD5	NM_001271512	ENSG00000107897	101.736	-0.580762	0.0753713	40.962	-0.350327	NA	76.739	-1.12386	0.00544556	35.0834	-0.390227	NA	66.8457	-1.7965	4.71838e-06	34.5003	-0.443228	0.396059
ZBTB7A_NM_015898	ZBTB7A	NM_015898	ENSG00000178951	96.9788	-0.495393	0.114708	68.4149	-0.41721	NA	75.9049	-0.848774	0.0352007	45.9533	-1.26345	0.00436715	60.8916	-1.87311	4.77897e-06	45.13	-1.36153	0.00237123
MIR3202-2_NR_036175	MIR3202-2	NR_036175	ENSG00000283694	91.7777	-0.506985	0.108759	51.0219	-0.610769	NA	62.6404	-1.45909	0.000700445	35.7978	-1.38233	NA	56.0237	-2.04313	4.77897e-06	33.5787	-1.75129	0.00049498
MIR4437_NR_039637	MIR4437	NR_039637	ENSG00000266705	125.745	-0.406146	0.164135	118.41	-0.302668	0.308142	89.5523	-0.941028	0.0992315	83.224	-0.673498	0.221119	77.7887	-1.84196	5.10936e-06	72.8206	-1.55338	0.000146508
NR3C1_NM_001018076	NR3C1	NM_001018076	ENSG00000113580	143.47	-0.444883	0.115527	82.8478	-0.391218	0.21919	106.183	-1.01029	0.00704673	65.8551	-0.616137	0.109396	92.9213	-1.59942	5.18362e-06	63.2653	-0.747394	0.0754854
ALDOA_NM_001127617	ALDOA	NM_001127617	ENSG00000149925	105.307	-0.561676	0.0931564	123.055	-0.559117	0.0924988	72.2336	-1.51337	0.000250961	84.5002	-1.38184	0.000271948	68.9768	-1.77424	5.27694e-06	78.7507	-1.77049	1.35229e-06
MRPL52_NM_178336	MRPL52	NM_178336	ENSG00000172590	72.2823	-0.68885	0.063586	58.2576	-0.453152	NA	54.6017	-1.26979	0.00421935	45.0551	-0.774007	0.0759981	47.1998	-2.07215	5.32462e-06	41.2914	-1.12835	0.0167793
PPP3CC_NM_001243974	PPP3CC	NM_001243974	ENSG00000120910	130.488	-0.439383	0.117564	96.0923	0.0529645	0.839986	93.1848	-1.15087	0.00267284	64.0739	-0.606494	0.120021	83.9419	-1.6315	5.35493e-06	64.7344	-0.558314	0.171181
GPN3_NM_001164372	GPN3	NM_001164372	ENSG00000111231	104.426	-0.40499	0.154769	53.938	-0.360032	NA	72.2072	-1.23422	0.00273164	42.8285	-0.580659	0.173046	64.346	-1.80837	5.54006e-06	42.1978	-0.610119	0.191616
LINC00649_NM_001288961	LINC00649	NM_001288961	N/A	97.3663	-0.460043	0.126372	105.672	-0.598325	0.0924988	71.5698	-1.05518	0.0115106	76.2545	-1.24068	0.00114617	60.4518	-1.86605	5.62623e-06	71.4603	-1.56152	3.39412e-05
GFI1_NM_001127215	GFI1	NM_001127215	ENSG00000162676	210.306	-0.234686	0.297974	209.861	-0.319208	0.20728	151.216	-0.840225	0.0115106	153.027	-0.818093	0.00941288	132.362	-1.37961	5.7257e-06	133.155	-1.38751	4.30613e-06
ZNF343_NM_001282495	ZNF343	NM_001282495	ENSG00000088876	88.7518	-0.527695	0.106641	21.3119	0.015389	NA	66.6307	-1.05776	0.0111977	19.3559	0.144412	NA	56.0216	-1.93605	5.75525e-06	16.3651	-0.179001	NA
JMJD1C_NM_032776	JMJD1C	NM_032776	ENSG00000171988	224.294	-0.363981	0.142579	239.065	-0.220059	0.339365	174.554	-0.718688	0.0335628	167.771	-0.836794	0.00607389	147.458	-1.39058	5.93651e-06	153.86	-1.17299	3.30279e-05
PRTN3_NM_002777	PRTN3	NM_002777	ENSG00000196415	139.582	-0.564181	0.0662689	117.16	-0.257713	0.348366	105.725	-1.08017	0.00361321	88.6511	-0.619243	0.0781513	94.7042	-1.57277	5.93651e-06	79.8113	-0.991152	0.00642704
PIGV_NM_001202554	PIGV	NM_001202554	ENSG00000060642	132.359	-0.468531	0.106641	125.195	-0.493126	0.124889	102.476	-0.866638	0.0224539	92.9015	-0.999706	0.007356	86.5356	-1.60324	6.40856e-06	78.891	-1.80443	8.81208e-07
UBE2M_NM_003969	UBE2M	NM_003969	ENSG00000130725	121.39	-0.625211	0.0612912	53.0768	-0.285661	NA	90.7714	-1.21372	0.0015325	38.7236	-0.741903	0.0951434	82.8055	-1.63815	6.44993e-06	38.3082	-0.800228	0.098389
FDFT1_NM_001287745	FDFT1	NM_001287745	ENSG00000079459	126.414	-0.527701	0.0881916	106.201	-0.408027	0.185069	89.0785	-1.33816	0.000532594	80.3026	-0.797545	0.0329095	82.047	-1.72248	6.44993e-06	69.2789	-1.10094	0.0896597
LAT_NM_001014989	LAT	NM_001014989	ENSG00000213658	151.046	-0.578184	0.0648199	69.7584	-0.57698	NA	107.207	-1.38899	0.000115578	56.6362	-0.759517	0.0669284	101.9	-1.58971	6.46778e-06	52.3347	-1.05109	0.0164867
GPN3_NM_001164373	GPN3	NM_001164373	ENSG00000111231	98.1862	-0.498347	0.112462	28.9644	0.0356627	NA	70.7522	-1.19025	0.00433131	24.1166	0.0252377	NA	62.2444	-1.82594	6.80514e-06	26.0525	0.233248	NA
KCTD15_NM_001129994	KCTD15	NM_001129994	ENSG00000153885	102.229	-0.42955	0.140877	82.7747	-0.652509	0.0834983	63.6508	-1.81508	1.48177e-05	60.1124	-1.30698	0.00151436	63.0655	-1.8306	6.91946e-06	63.1396	-1.06352	0.00934611
MIR4738_NR_039892	MIR4738	NR_039892	ENSG00000283853	135.003	-0.610355	0.0583325	98.3691	-0.543228	0.121699	103.322	-1.08892	0.00302929	73.8427	-1.02066	0.0112215	92.8908	-1.55586	7.54578e-06	67.1531	-1.44308	0.000279489
KEAP1_NM_012289	KEAP1	NM_012289	ENSG00000079999	156.297	-0.477356	0.0931564	103.414	-0.275961	0.341345	118.888	-0.930011	0.0105561	81.8785	-0.485807	0.173407	104.299	-1.49273	7.84293e-06	75.6661	-0.706675	0.0695056
SLC28A3_NM_022127	SLC28A3	NM_022127	ENSG00000197506	93.757	-0.622409	0.0695679	106.16	-0.658766	0.0726801	66.34	-1.46501	0.000487048	75.7122	-1.38881	0.000309874	61.0368	-1.88981	8.36579e-06	70.4769	-1.78424	3.49674e-06
ETV6_NM_001987	ETV6	NM_001987	ENSG00000139083	134.637	-0.235957	0.350052	152.668	-0.203542	0.436037	103.072	-0.526008	0.331261	110.56	-0.698663	0.0570188	79.8532	-1.69428	8.52795e-06	98.0956	-1.15888	0.00150334
USP32_NM_032582	USP32	NM_032582	ENSG00000170832	119.848	-0.303459	0.240073	72.8538	-0.676118	NA	78.7218	-1.30747	0.00178075	58.9168	-0.901126	0.0288707	72.6995	-1.69507	8.52795e-06	52.2549	-1.3948	0.00112403
REPIN1_NM_001099695	REPIN1	NM_001099695	ENSG00000214022	139.811	-0.482328	0.10073	85.9571	-0.684459	0.0726801	99.525	-1.22879	0.00113346	67.1315	-1.03194	0.0103536	92.7465	-1.54841	8.52795e-06	59.2945	-1.56994	0.000132758
SMARCA2_NM_001289400	SMARCA2	NM_001289400	ENSG00000080503	84.2039	-0.697907	0.0604985	20.9976	-0.77054	NA	62.883	-1.33799	0.00247922	21.6791	-0.329711	NA	55.8506	-1.96655	8.52795e-06	20.8143	-0.559252	NA
METTL21A_NM_145280	METTL21A	NM_145280	ENSG00000144401	88.809	-0.577476	0.0850066	74.862	-0.18599	NA	65.1877	-1.23967	0.00345395	55.7725	-0.572621	0.172594	57.6947	-1.85592	8.59654e-06	48.9464	-1.03234	0.0264446
PLAC8_NM_001130716	PLAC8	NM_001130716	ENSG00000145287	182.474	-0.385762	0.13392	230.326	-0.377515	0.16314	134.891	-0.939031	0.00704743	164.567	-0.985466	0.00328421	119.367	-1.44235	8.60011e-06	147.766	-1.47095	1.4382e-06
SNRPA_NM_004596	SNRPA	NM_004596	ENSG00000077312	121.074	-0.598363	0.0648199	109.309	-0.302194	0.297525	92.3551	-1.1025	0.00386218	87.0491	-0.493315	0.159187	82.3317	-1.64113	8.6885e-06	76.7429	-0.895549	0.0208822
CD72_NM_001782	CD72	NM_001782	ENSG00000137101	109.225	-0.600202	0.0749976	85.7819	-0.622927	0.0928089	78.3705	-1.34779	0.000908383	61.8936	-1.26324	0.00209177	71.674	-1.78658	8.70135e-06	56.7232	-1.72811	2.96477e-05
C10orf54_NM_022153	C10orf54	NM_022153	ENSG00000107738	89.1072	-0.863548	0.0264836	86.0753	-0.325377	0.287696	67.8609	-1.46514	0.000409369	63.0199	-0.807672	0.0401048	62.5327	-1.86271	8.78473e-06	57.9373	-1.12598	0.00595778
RUFY4_NR_034176	RUFY4	NR_034176	ENSG00000188282	89.0246	-0.969022	0.0147139	21.0962	-0.69561	NA	65.4244	-1.82128	1.69311e-05	19.7814	-0.577369	NA	65.9868	-1.74767	8.78473e-06	21.1298	-0.394488	NA
DNAAF5_NM_017802	DNAAF5	NM_017802	ENSG00000164818	95.6242	-0.616477	0.068269	26.5954	-0.0278533	NA	69.3942	-1.3337	0.00151345	17.2944	-0.667531	NA	63.4149	-1.79851	8.78473e-06	16.8926	-0.778354	NA
SLC39A10_NM_001127257	SLC39A10	NM_001127257	ENSG00000196950	84.5424	-0.872257	0.0276981	63.508	-0.43545	NA	62.073	-1.70197	6.1863e-05	49.2577	-0.756967	0.074513	60.6679	-1.8198	9.12554e-06	42.9845	-1.27997	0.00515562
FAM32A_NM_014077	FAM32A	NM_014077	ENSG00000105058	92.3214	-0.511799	0.10806	107.591	-0.196526	0.456524	66.7276	-1.20178	0.00421935	81.221	-0.540854	0.12792	58.1572	-1.88073	9.12678e-06	72.5185	-0.907032	0.0185535
C5orf66-AS1_NR_105049	C5orf66-AS1	NR_105049	ENSG00000249082	186.285	-0.0736706	0.733622	185.564	-0.209887	0.387676	125.079	-0.869434	0.0135702	131.869	-0.774718	0.0172126	108.993	-1.44467	9.21227e-06	120.202	-1.12317	0.000276387
SCARB1_NM_001082959	SCARB1	NM_001082959	ENSG00000073060	98.4017	-0.795245	0.0318623	47.8609	-0.129504	NA	72.0167	-1.55816	0.000120164	37.2878	-0.340909	NA	68.6828	-1.77642	9.28709e-06	33.9992	-0.581411	0.261966
SMARCA2_NM_001289399	SMARCA2	NM_001289399	ENSG00000080503	84.4693	-0.703075	0.0601528	21.3028	-0.743079	NA	63.112	-1.34365	0.00236934	21.6791	-0.329711	NA	56.4247	-1.93615	9.91926e-06	20.8143	-0.559252	NA
PLCB2_NM_001284297	PLCB2	NM_001284297	ENSG00000137841	90.4768	-0.590337	0.0784514	68.6604	-0.496957	NA	68.0501	-1.13243	0.00615346	51.524	-0.950197	0.0250464	59.0386	-1.82572	1.01964e-05	49.6833	-1.08705	0.0126774
CCDC102A_NM_033212	CCDC102A	NM_033212	ENSG00000135736	74.1733	-0.712896	0.0583325	32.2162	-0.150327	NA	58.5624	-1.10374	0.0109234	24.8564	-0.388245	NA	48.482	-2.04655	1.05267e-05	22.189	-0.726879	NA
CRADD_NM_003805	CRADD	NM_003805	ENSG00000169372	71.5607	-0.60177	0.0931564	87.5786	-0.687084	0.0726801	53.0761	-1.23715	0.00786284	71.6064	-0.861093	0.0274347	45.8367	-2.04873	1.05615e-05	62.5961	-1.41102	0.000401583
REEP3_NM_001001330	REEP3	NM_001001330	ENSG00000165476	204.02	-0.149694	0.480898	200.243	-0.171026	0.455245	148.194	-0.695265	0.0378885	136.041	-0.889756	0.00547009	124.933	-1.3662	1.07133e-05	124.696	-1.24046	4.49879e-05
CDKN1B_NM_004064	CDKN1B	NM_004064	ENSG00000111276	162.348	-0.35052	0.170753	181.329	-0.249498	0.315981	127.85	-0.656677	0.0584209	135.104	-0.656064	0.0385061	104.76	-1.45741	1.07133e-05	118.099	-1.13613	0.000509159
LYL1_NM_005583	LYL1	NM_005583	ENSG00000104903	134.378	-0.468587	0.106641	143.245	-0.564918	0.0810008	102.717	-0.909789	0.0134362	114.404	-0.795552	0.019175	87.3271	-1.6029	1.11964e-05	104.547	-1.11849	0.000791495
SNRPB2_NM_003092	SNRPB2	NM_003092	ENSG00000125870	57.181	-0.791121	NA	46.5512	-0.225539	NA	44.7487	-1.30652	0.00704673	35.2406	-0.570129	NA	38.2645	-2.21712	1.21583e-05	35.712	-0.530922	0.287584
PARP8_NM_001178055	PARP8	NM_001178055	ENSG00000151883	164.249	-0.377784	0.147535	162.508	-0.305125	0.275666	127.412	-0.751009	0.0401608	126.988	-0.564009	0.109876	106.284	-1.51095	1.21583e-05	119.434	-0.763041	0.0247842
C19orf54_NM_198476	C19orf54	NM_198476	ENSG00000188493	117.02	-0.611084	0.0612912	145.518	-0.522527	0.0969304	91.0106	-1.03584	0.00675279	106.784	-1.06103	0.0028441	80.2429	-1.60896	1.23404e-05	93.3566	-1.73368	4.31358e-07
CCDC94_NM_018074	CCDC94	NM_018074	ENSG00000105248	120.277	-0.943296	0.00918904	69.0255	-0.559013	NA	97.2185	-1.28505	0.000727829	58.0496	-0.643211	0.118782	91.8462	-1.5373	1.23951e-05	51.5834	-1.04921	0.0222171
ZNF185_NM_001178113	ZNF185	NM_001178113	ENSG00000147394	59.1069	-0.514561	NA	45.4651	-0.672294	NA	40.2414	-1.46601	0.00310751	31.5451	-1.5204	NA	35.6508	-2.20265	1.25409e-05	32.2763	-1.47795	0.00363331
WIPF1_NM_003387	WIPF1	NM_003387	ENSG00000115935	86.3056	-0.471354	0.135557	118.378	-0.222133	0.514555	63.2048	-1.10855	0.00997669	92.1754	-0.348927	0.529784	53.6995	-1.91061	1.314e-05	75.6348	-1.3046	0.00192163
NDUFS2_NM_004550	NDUFS2	NM_004550	ENSG00000158864	87.0202	-0.436397	0.236471	91.8235	-0.76786	0.0534516	60.9687	-1.4493	0.00163819	69.6685	-1.23306	0.0021788	56.9646	-1.87788	1.34877e-05	67.7862	-1.40147	0.000338559
H2AFY_NM_004893	H2AFY	NM_004893	ENSG00000113648	310.687	-0.300434	0.184779	276.288	-0.197931	0.379237	240.664	-0.655596	0.0463353	222.938	-0.34036	0.223263	207.548	-1.20559	1.34877e-05	182.805	-1.01157	0.000365645
C17orf64_NM_181707	C17orf64	NM_181707	ENSG00000141371	113.242	-0.429071	0.134352	46.4107	-0.136339	NA	84.7616	-0.944241	0.0164626	35.6633	-0.398635	NA	72.4036	-1.64709	1.40311e-05	32.82	-0.638892	0.216295
CKS2_NM_001827	CKS2	NM_001827	ENSG00000123975	71.0154	-0.608966	0.0844979	55.0805	-0.258616	NA	55.2956	-1.03328	0.0218228	42.4123	-0.549002	0.198818	45.7563	-1.97567	1.41212e-05	44.1841	-0.421813	0.358919
DOK3_NM_001144875	DOK3	NM_001144875	ENSG00000146094	84.5777	-0.561733	0.0941067	113.216	-0.655197	0.0727512	60.0434	-1.35752	0.00170797	82.775	-1.23178	0.00164599	54.5802	-1.85291	1.41472e-05	73.2555	-1.89518	6.68308e-07
NKAPP1_NR_027131	NKAPP1	NR_027131	ENSG00000233382	108.159	-0.0892832	0.732716	217.047	-0.101972	0.655023	74.801	-0.760331	0.0872128	146.843	-0.81031	0.0150484	58.884	-1.85684	1.41472e-05	125.964	-1.47213	4.53733e-06
AOX2P_NR_001557	AOX2P	NR_001557	N/A	106.39	-0.736755	0.0581549	133.276	-0.856985	0.0389056	74.5977	-1.74221	6.1863e-05	96.2555	-1.67319	9.67741e-06	74.1433	-1.77186	1.47198e-05	87.0314	-2.41033	1.67419e-10
EGR3_NM_004430	EGR3	NM_004430	ENSG00000179388	147.588	-0.403838	0.13184	38.4327	0.143217	NA	103.812	-1.16692	0.00169437	30.9123	0.0612526	NA	94.4508	-1.56311	1.48931e-05	33.4414	0.275168	0.589384
RREB1_NM_001168344	RREB1	NM_001168344	ENSG00000124782	135.832	-0.461479	0.107234	185.939	-0.22874	0.355313	96.0727	-1.23156	0.000964955	137.908	-0.651389	0.0433224	90.0641	-1.51459	1.51046e-05	117.799	-1.2619	7.41837e-05
NARF_NM_001038618	NARF	NM_001038618	ENSG00000141562	83.0743	-0.724869	0.0583325	58.0248	-0.374687	NA	64.0068	-1.23807	0.00501559	46.8006	-0.544842	0.193751	56.3639	-1.88806	1.52651e-05	45.1346	-0.645887	0.16102
CSMD3_NM_052900	CSMD3	NM_052900	ENSG00000164796	122.28	-0.36314	0.186574	213.327	-0.377474	0.172135	86.3765	-1.09459	0.00639846	147.985	-1.10784	0.000899055	76.4599	-1.67295	1.53445e-05	138.377	-1.41409	1.29172e-05
FAAP20_NM_001282670	FAAP20	NM_001282670	ENSG00000162585	85.6775	-0.659607	0.0656974	30.3294	-0.330238	NA	62.11	-1.36763	0.00225808	25.0828	-0.434541	NA	57.365	-1.83903	1.54165e-05	22.0255	-0.836437	NA
RUNX2_NM_001278478	RUNX2	NM_001278478	ENSG00000124813	182.017	-0.302379	0.206748	229.573	-0.335726	0.179989	129.034	-0.990249	0.00423862	179.097	-0.606534	0.0406261	117.079	-1.39758	1.54165e-05	158.874	-1.03235	0.000226277
ZNF747_NM_001305018	ZNF747	NM_001305018	ENSG00000169955	109.952	-0.597457	0.0656974	104.965	-0.404901	0.186974	84.538	-1.0575	0.00649569	78.9303	-0.821306	0.0282599	74.7204	-1.61508	1.61764e-05	68.1217	-1.40337	0.000323244
NFX1_NM_002504	NFX1	NM_002504	ENSG00000086102	86.0707	-0.591998	0.0801715	44.9819	-0.237	NA	60.6377	-1.43468	0.000760713	34.9984	-0.502802	NA	56.6602	-1.80196	1.62346e-05	32.2725	-0.775235	0.133358
SIGIRR_NM_001135054	SIGIRR	NM_001135054	ENSG00000185187	99.3957	-0.794716	0.0329803	51.3799	-0.555201	NA	76.0411	-1.3729	0.000619981	42.9697	-0.646899	0.130719	71.9009	-1.64814	1.65143e-05	38.5978	-1.0325	0.0305073
FNBP4_NM_015308	FNBP4	NM_015308	ENSG00000109920	92.2176	-0.68071	0.0612912	52.0728	-0.164336	NA	74.5272	-0.989214	0.0190794	38.7466	-0.545332	0.225954	62.8705	-1.80276	1.65143e-05	35.8373	-0.800996	0.106757
CELF2_NM_001025076	CELF2	NM_001025076	ENSG00000048740	129.526	-0.447582	0.120721	110.938	-0.244	0.379264	101.012	-0.812683	0.0304119	80.9181	-0.717156	0.0511394	84.6624	-1.56318	1.75178e-05	72.9865	-1.09162	0.00390119
KAT7_NM_001199155	KAT7	NM_001199155	ENSG00000136504	108.538	-0.428877	0.142579	46.1385	-0.29037	NA	81.9712	-0.908509	0.0223601	34.289	-0.682702	NA	69.0523	-1.67863	1.80576e-05	31.0309	-1.05622	0.0418266
PTMA_NM_001099285	PTMA	NM_001099285	ENSG00000187514	127.66	-0.398102	0.152143	78.5973	-0.211359	0.459669	89.4108	-1.17119	0.00226325	56.8276	-0.670813	0.104115	82.2428	-1.55233	1.80576e-05	59.8526	-0.492783	0.24884
MANF_NM_006010	MANF	NM_006010	ENSG00000145050	77.2842	-0.807591	0.0391157	47.433	-0.170061	NA	59.627	-1.32997	0.00214737	37.042	-0.410518	NA	54.2628	-1.82039	1.80576e-05	39.8929	-0.187156	0.707789
PTPN7_NM_080588	PTPN7	NM_080588	ENSG00000143851	115.2	-0.643387	0.0581549	105.548	-0.333985	0.254713	81.5555	-1.48877	0.000152899	77.392	-0.799036	0.0370691	77.3228	-1.71507	1.82934e-05	67.2127	-1.35806	0.000791495
LPAR5_NM_020400	LPAR5	NM_020400	ENSG00000184574	73.8705	-0.624551	0.0810149	68.9723	-0.709388	NA	56.0356	-1.15235	0.00976023	50.111	-1.36151	0.00176908	47.8333	-1.98623	1.85129e-05	52.9039	-1.1648	0.00717023
THBD_NM_000361	THBD	NM_000361	ENSG00000178726	103.346	-0.589339	0.0718825	98.0732	-0.650005	0.0737527	76.8707	-1.19228	0.00293549	75.672	-1.04108	0.00668502	69.7908	-1.64436	1.87799e-05	69.9043	-1.38314	0.000242966
PAN2_NM_001166279	PAN2	NM_001166279	ENSG00000135473	104.305	-0.56871	0.0931579	96.6069	-0.699638	0.0574945	73.4582	-1.41372	0.000571062	69.0784	-1.44304	0.000231059	69.0842	-1.70504	1.93091e-05	66.2609	-1.66719	1.67317e-05
SIT1_NM_014450	SIT1	NM_014450	ENSG00000137078	67.5877	-0.650804	NA	123.299	-0.754553	0.0389056	50.7694	-1.24588	0.00603695	81.3784	-1.96525	1.04968e-07	44.1779	-1.97669	2.0027e-05	81.7904	-1.96669	6.43845e-08
HSPA8_NM_006597	HSPA8	NM_006597	ENSG00000109971	141.106	-0.578271	0.0618497	49.7301	0.393495	NA	116.51	-0.754841	0.0458914	40.2114	0.352004	0.402646	98.2207	-1.46212	2.00469e-05	44.1834	0.576346	0.234741
TMEM69_NM_016486	TMEM69	NM_016486	ENSG00000159596	104.964	-0.433518	0.142579	42.5375	-0.203124	NA	78.4227	-0.954692	0.0173952	34.5431	-0.355069	NA	66.4912	-1.6973	2.03658e-05	33.8876	-0.409853	0.429918
P2RX1_NM_002558	P2RX1	NM_002558	ENSG00000108405	106.309	-0.463797	0.121812	79.4194	-0.262042	0.381545	72.1094	-1.41576	0.000572899	58.1699	-0.711404	0.074513	68.6017	-1.66783	2.03658e-05	53.7425	-0.978232	0.0229921
TRERF1_NM_001297573	TRERF1	NM_001297573	ENSG00000124496	122.189	-0.422207	0.132123	76.2208	-0.424659	0.203371	89.7409	-1.01497	0.00777325	61.9014	-0.582249	0.13331	78.1347	-1.61244	2.1824e-05	51.9086	-1.23643	0.00411294
STAT5B_NM_012448	STAT5B	NM_012448	ENSG00000173757	84.2053	-0.527024	0.106641	43.233	-0.139869	NA	64.7823	-0.962455	0.0218115	34.4052	-0.304908	NA	53.6799	-1.83537	2.25587e-05	28.9109	-0.824054	0.122786
SAMD10_NM_080621	SAMD10	NM_080621	ENSG00000130590	98.8323	-0.63865	0.065296	79.9448	-0.691021	0.0727512	71.1891	-1.37923	0.00111763	59.013	-1.25083	0.00311928	65.3824	-1.79623	2.27646e-05	56.7141	-1.47229	0.000320079
CYB561_NM_001017916	CYB561	NM_001017916	ENSG00000008283	96.0913	-0.463283	0.128185	33.4845	-0.27336	NA	64.9284	-1.43067	0.000727829	27.6156	-0.364444	NA	60.6891	-1.76275	2.29262e-05	23.4676	-0.842178	NA
TMSB4X_NM_021109	TMSB4X	NM_021109	ENSG00000205542	95.7522	-0.399145	0.189369	80.9978	-0.261557	0.380825	68.6188	-1.07294	0.0121812	56.8537	-0.860314	0.0353403	59.0995	-1.81013	2.31513e-05	53.349	-1.07586	0.0136514
DDX6_NM_004397	DDX6	NM_004397	ENSG00000110367	132.469	-0.391984	0.145745	81.4392	-0.303164	0.321731	99.9614	-0.876463	0.0183248	65.7694	-0.448186	0.234451	86.1087	-1.50325	2.32212e-05	59.9621	-0.733199	0.0751086
MIR24-2_NR_029497	MIR24-2	NR_029497	ENSG00000284387	161.016	-0.42056	0.121812	136.788	-0.354983	0.211937	116.736	-1.05699	0.00292835	99.4872	-0.852058	0.0244542	106.568	-1.42621	2.33861e-05	91.568	-1.1981	0.000636313
CDK6_NM_001259	CDK6	NM_001259	ENSG00000105810	241.409	-0.150043	0.473588	254.42	-0.0254143	0.901362	188.836	-0.444948	0.156357	180.884	-0.540408	0.066236	152.046	-1.23446	2.33861e-05	148.168	-1.30354	4.30613e-06
ZNF425_NM_001001661	ZNF425	NM_001001661	ENSG00000204947	117.698	-0.489575	0.106641	53.4016	-0.361133	NA	84.1314	-1.2171	0.00210861	44.1702	-0.476394	0.25551	77.7945	-1.57277	2.35676e-05	41.2484	-0.674848	0.152524
PREB_NM_013388	PREB	NM_013388	ENSG00000138073	121.053	-0.653684	0.0581549	109.909	-0.651812	0.0797065	90.0862	-1.27638	0.000919487	81.0594	-1.24857	0.00212793	85.2369	-1.52106	2.46373e-05	73.8242	-1.74902	6.78616e-06
MIR3191_NR_036159	MIR3191	NR_036159	ENSG00000284411	179.284	-0.528554	0.0673482	125.204	-0.365821	0.204516	135.763	-1.02474	0.00296468	93.0749	-0.807487	0.024709	124.895	-1.35256	2.52115e-05	87.5724	-1.00347	0.00749493
LOC101930452_NR_120479	LOC101930452	NR_120479	ENSG00000260423	85.5014	-0.565851	0.0931564	99.4821	-1.11608	0.00807157	61.2576	-1.3268	0.00210861	78.1344	-1.6083	3.31799e-05	55.6745	-1.8454	2.53686e-05	70.0014	-2.3554	1.71455e-09
METTL21A_NM_001127395	METTL21A	NM_001127395	ENSG00000144401	96.4609	-0.605877	0.0717789	85.3572	-0.374867	0.242451	68.1118	-1.46572	0.000424419	64.118	-0.789953	0.0496513	65.1588	-1.66826	2.58682e-05	54.8791	-1.44054	0.000773092
MFSD2A_NM_001136493	MFSD2A	NM_001136493	ENSG00000168389	85.5302	-0.401564	0.179256	43.4933	-0.266269	NA	61.8256	-1.01478	0.0226658	34.7667	-0.455655	NA	52.0609	-1.85869	2.65508e-05	31.2229	-0.776964	0.132325
HMX2_NM_005519	HMX2	NM_005519	ENSG00000188816	161.546	-0.0901086	0.68721	145.871	-0.367918	0.1956	110.701	-0.821213	0.023454	101.061	-1.08755	0.0022386	95.2312	-1.4351	2.67089e-05	89.812	-1.63677	1.89486e-06
MDM4_NM_001204171	MDM4	NM_001204171	ENSG00000198625	104.868	-0.612841	0.0656974	129.336	-0.57383	0.0924988	81.507	-1.03276	0.00877733	93.1059	-1.21263	0.000899055	70.6225	-1.66338	2.75551e-05	82.7926	-1.81269	5.57729e-07
TBC1D10C_NM_001256508	TBC1D10C	NM_001256508	ENSG00000175463	91.8052	-0.706446	0.0581549	64.3138	-0.440917	NA	71.7429	-1.1341	0.0054405	50.4474	-0.70444	0.0894574	64.051	-1.67283	2.77522e-05	45.838	-1.06347	0.0175039
ZNF561_NM_152289	ZNF561	NM_152289	ENSG00000171469	127.196	-0.477747	0.106641	70.3667	-0.376578	NA	96.1466	-0.968592	0.0105356	51.9823	-0.844242	0.0425491	84.1726	-1.52862	2.77522e-05	52.1699	-0.837044	0.051753
CAPZA1_NM_006135	CAPZA1	NM_006135	ENSG00000116489	153.001	-0.457621	0.107656	95.2098	-0.361726	0.24849	116.382	-0.916489	0.0100641	82.0898	-0.328285	0.351127	102.81	-1.44176	2.79106e-05	72.3155	-0.71244	0.0669385
C20orf196_NM_001303477	C20orf196	NM_001303477	ENSG00000171984	82.7262	-0.346772	0.241777	46.7248	-0.597319	NA	59.1326	-0.8231	0.165037	36.352	-0.965997	NA	48.9962	-1.93051	2.79106e-05	37.2475	-0.912059	0.0743658
EMID1_NM_001267895	EMID1	NM_001267895	ENSG00000186998	92.9395	-0.549554	0.104954	70.3142	-0.270919	NA	66.5013	-1.28027	0.00324978	49.0959	-0.878652	0.0428095	60.6088	-1.75354	2.81343e-05	47.5556	-0.973944	0.0393175
EMB_NM_198449	EMB	NM_198449	ENSG00000170571	250.238	-0.225145	0.327198	267.927	-0.169954	0.446923	191.892	-0.601009	0.0897256	198.519	-0.584471	0.0558812	159.73	-1.30377	2.85427e-05	171.491	-1.12871	0.000108069
MYBPH_NM_004997	MYBPH	NM_004997	ENSG00000133055	91.6087	-0.714442	0.0581549	111.919	-0.68216	0.0583341	66.4777	-1.45704	0.000644867	78.0724	-1.53707	6.29835e-05	62.9456	-1.72764	2.85448e-05	71.5382	-2.09538	1.02178e-07
COMT_NM_000754	COMT	NM_000754	ENSG00000093010	96.2214	-0.773756	0.0339031	152.838	-0.644441	0.055684	76.3901	-1.1375	0.00504887	106.058	-1.512	9.67741e-06	68.1622	-1.66372	2.85448e-05	95.9172	-2.14176	3.95846e-10
HNRNPH1_NM_005520	HNRNPH1	NM_005520	ENSG00000169045	113.824	-0.543782	0.0851047	54.3913	-0.22564	NA	87.1502	-1.00337	0.0101775	39.3116	-0.696924	0.114066	76.7693	-1.56804	2.86182e-05	38.9736	-0.725122	0.131592
LILRA2_NM_001130917	LILRA2	NM_001130917	ENSG00000239998	112.862	-0.745821	0.0337175	65.8658	-0.306739	NA	84.8136	-1.34705	0.00052838	49.9882	-0.638698	0.127662	81.7017	-1.51064	2.89076e-05	47.5825	-0.802547	0.0752477
ANKRD13D_NM_207354	ANKRD13D	NM_207354	ENSG00000172932	101.189	-0.422233	0.142991	47.4765	-0.0826527	NA	75.518	-0.94156	0.0185992	33.0498	-0.565816	NA	63.5197	-1.70612	2.97152e-05	29.6726	-0.989291	0.0655109
HNRNPH1_NM_001257293	HNRNPH1	NM_001257293	ENSG00000169045	113.177	-0.552103	0.0801715	54.6966	-0.213153	NA	86.3703	-1.02661	0.00854046	39.3116	-0.696924	0.114066	76.585	-1.56385	3.01282e-05	39.3374	-0.696648	0.144894
SPN_NM_001030288	SPN	NM_001030288	ENSG00000197471	130.989	-0.363488	0.175949	117.14	-0.422032	0.16314	95.2289	-0.976061	0.0137583	92.2412	-0.672367	0.0558935	83.9156	-1.52354	3.02034e-05	77.2936	-1.35703	0.000264839
DENND1B_NM_001195215	DENND1B	NM_001195215	ENSG00000213047	106.183	-0.418943	0.149499	105.338	-0.199803	0.456466	75.3793	-1.139	0.00554904	74.0504	-0.798029	0.035983	66.6457	-1.71089	3.03163e-05	73.7125	-0.794817	0.0372819
PIGL_NM_004278	PIGL	NM_004278	ENSG00000108474	131.617	-0.474899	0.107656	43.5982	-0.409351	NA	98.7832	-0.994016	0.010232	40.8055	-0.195689	0.646259	87.9523	-1.51329	3.04945e-05	31.6002	-0.961722	0.0626364
FRY_NM_023037	FRY	NM_023037	ENSG00000073910	132.657	-0.432044	0.14501	131.527	-0.093482	0.702886	109.62	-0.607872	0.131629	98.2802	-0.456056	0.219833	85.9115	-1.61571	3.15195e-05	79.5055	-1.23077	0.00100135
LOC101927027_NR_110204	LOC101927027	NR_110204	ENSG00000223960	81.1085	-0.546397	0.107485	100.387	-0.703472	0.056857	57.2017	-1.35726	0.00247922	76.5031	-1.15524	0.00281529	51.9997	-1.85248	3.24411e-05	69.9455	-1.57219	4.64205e-05
DOCK8_NM_203447	DOCK8	NM_203447	ENSG00000107099	191.922	-0.308117	0.194791	187.5	-0.121368	0.589555	141.489	-0.844703	0.0181142	151.85	-0.250403	0.420426	125.808	-1.30389	3.294e-05	122.845	-0.940368	0.00292947
CITED2_NM_001168388	CITED2	NM_001168388	ENSG00000164442	130.655	-0.436608	0.118413	87.157	-0.3845	0.225166	97.7651	-0.953779	0.0105311	65.7542	-0.789616	0.0427465	86.5196	-1.46897	3.30012e-05	64.8637	-0.833075	0.0366712
SEPHS1_NM_001195602	SEPHS1	NM_001195602	ENSG00000086475	89.7155	-0.673981	0.0604985	48.0817	-0.218904	NA	68.939	-1.18523	0.00421935	29.9495	-1.2214	NA	62.0951	-1.67647	3.3162e-05	34.8269	-0.71406	0.160178
LOC400958_NR_036586	LOC400958	NR_036586	ENSG00000237638	89.6414	-0.404733	0.172559	69.0929	-0.42431	NA	64.6991	-1.05976	0.0131682	54.2622	-0.709772	0.0797511	55.9045	-1.75665	3.44698e-05	49.5189	-1.02218	0.0206954
ST3GAL4_NM_006278	ST3GAL4	NM_006278	ENSG00000110080	98.7832	-0.423114	0.145057	81.5963	-0.511178	0.138458	69.4128	-1.18674	0.00384502	56.7019	-1.27989	0.0022386	62.8819	-1.66648	3.51165e-05	55.5416	-1.33095	0.00256261
RREB1_NM_001003698	RREB1	NM_001003698	ENSG00000124782	127.018	-0.486858	0.10073	200.591	-0.221362	0.355665	92.2206	-1.15296	0.0023562	149.103	-0.636566	0.0433224	85.5156	-1.47356	3.51165e-05	129.103	-1.17113	0.000139516
PATZ1_NM_014323	PATZ1	NM_014323	ENSG00000100105	81.3277	-0.658298	0.065296	46.7924	-0.317402	NA	64.3442	-1.02013	0.0149795	33.1522	-0.897327	NA	55.1049	-1.73945	3.5783e-05	31.2851	-1.13794	0.0314848
SH3BGRL3_NM_031286	SH3BGRL3	NM_031286	ENSG00000142669	110.625	-0.76769	0.0322803	79.3445	-0.404605	0.21919	79.0596	-1.63874	2.79864e-05	58.7164	-0.864969	0.0349504	78.6993	-1.60501	3.61071e-05	51.6172	-1.38555	0.00138108
ARL5C_NM_001143968	ARL5C	NM_001143968	ENSG00000141748	94.3957	-0.787345	0.0329803	62.6271	-0.746189	NA	71.766	-1.35837	0.00084384	50.129	-0.991248	0.0241813	68.2852	-1.599	3.611e-05	44.9955	-1.47832	0.00110618
STX10_NM_001271609	STX10	NM_001271609	ENSG00000104915	130.795	-0.369024	0.172559	81.5877	0.0187243	0.944329	92.6811	-1.07666	0.00461362	64.4802	-0.148394	0.690837	84.2531	-1.4869	3.6759e-05	51.3055	-0.80909	0.0742556
PAN2_NM_001127460	PAN2	NM_001127460	ENSG00000135473	98.2882	-0.676723	0.0581549	98.7224	-0.604229	0.0924988	69.063	-1.59178	0.000102482	70.1852	-1.30918	0.000928304	68.6857	-1.59301	3.76145e-05	65.7743	-1.65022	2.4983e-05
CKLF-CMTM1_NM_001202509	CKLF-CMTM1	NM_001202509	ENSG00000254788	93.5389	-0.617392	0.071826	65.0362	-0.373313	NA	74.0434	-0.97086	0.0175199	51.1018	-0.634031	0.120199	63.6621	-1.65842	3.83089e-05	48.3461	-0.824688	0.0654052
IL17RC_NM_001203263	IL17RC	NM_001203263	ENSG00000163702	60.8906	-0.591148	NA	42.1585	0.0750685	NA	43.9391	-1.31219	0.00532007	28.0102	-0.478907	NA	38.8177	-2.01602	3.83089e-05	28.3516	-0.452566	0.398633
JADE2_NM_001289984	JADE2	NM_001289984	ENSG00000043143	111.426	-0.675091	0.0581549	77.2834	-0.514722	0.148017	87.8316	-1.05724	0.00704743	58.8919	-0.913566	0.0260229	78.5357	-1.54364	3.83089e-05	52.1755	-1.43873	0.000750322
LOC284454_NR_036515	LOC284454	NR_036515	ENSG00000267519	163.615	-0.406652	0.130322	131.973	-0.333609	0.240791	118.426	-1.04286	0.00320969	95.865	-0.828835	0.029942	108.917	-1.3736	3.87183e-05	88.9675	-1.13671	0.00138107
EXOC3-AS1_NR_126522	EXOC3-AS1	NR_126522	ENSG00000221990	105.478	-0.161381	0.548226	182.202	-0.25604	0.320726	69.7484	-1.01926	0.0178125	120.492	-1.1143	0.000878708	59.1814	-1.7861	3.87183e-05	101.839	-1.99326	1.73807e-09
IL17RC_NM_153461	IL17RC	NM_153461	ENSG00000163702	58.7575	-0.59925	NA	42.3683	0.0646061	NA	42.3259	-1.33207	0.00509502	28.7984	-0.434027	NA	37.4652	-2.0329	3.87904e-05	28.7845	-0.437871	0.41203
ZMYND11_NM_001202464	ZMYND11	NM_001202464	ENSG00000015171	198.099	-0.172338	0.443602	218.699	-0.305623	0.226463	141.293	-0.784276	0.0220749	151.931	-0.988036	0.00176908	123.541	-1.30416	3.88032e-05	133.837	-1.5672	1.14546e-07
TBC1D10C_NR_046266	TBC1D10C	NR_046266	ENSG00000175463	91.9288	-0.71036	0.0581549	65.0409	-0.468486	NA	70.9273	-1.19267	0.00351425	52.4755	-0.640436	0.118691	64.7589	-1.62391	4.09838e-05	46.4143	-1.09544	0.0139172
CCDC71_NM_022903	CCDC71	NM_022903	ENSG00000177352	125.678	-0.608652	0.0601528	57.6656	-0.292337	NA	87.7399	-1.51631	6.28425e-05	42.3507	-0.739411	0.08885	86.2638	-1.54137	4.10943e-05	38.2717	-1.11122	0.0200355
B2M_NM_004048	B2M	NM_004048	ENSG00000166710	83.9769	-0.407193	0.183809	72.2806	-0.299467	NA	68.1974	-0.637579	0.140139	53.7096	-0.713127	0.0828083	51.7728	-1.84123	4.11337e-05	52.1489	-0.82212	0.0561864
BUB1_NM_001278616	BUB1	NM_001278616	ENSG00000169679	86.9497	-0.509461	0.11444	34.5093	-0.22759	NA	66.55	-0.962497	0.0215779	28.1558	-0.352762	NA	56.2197	-1.75451	4.11337e-05	24.2897	-0.785386	NA
RUNX3_NM_001031680	RUNX3	NM_001031680	ENSG00000020633	92.6729	-0.595139	0.0783577	80.4509	-0.376351	0.242451	68.8401	-1.22358	0.00302845	58.9542	-0.868554	0.0349086	62.9566	-1.63854	4.16241e-05	59.0039	-0.849978	0.045326
ZMIZ2_NM_001300959	ZMIZ2	NM_001300959	ENSG00000122515	53.3496	-0.520717	NA	24.7839	0.225966	NA	39.3739	-1.11819	0.0222691	15.0692	-0.36956	NA	32.4662	-2.13915	4.37432e-05	19.2926	0.187654	NA
LOC374443_NR_046451	LOC374443	NR_046451	N/A	123.074	-0.337696	0.208721	134.996	-0.2445	0.358679	88.2224	-0.990455	0.0120206	96.6381	-0.788973	0.0269059	77.0909	-1.57182	4.51038e-05	91.4905	-0.985884	0.00473617
PHYKPL_NM_001278346	PHYKPL	NM_001278346	ENSG00000175309	90.1677	-0.593694	0.0801715	54.5754	-0.532966	NA	67.742	-1.14457	0.00603369	40.107	-1.0883	0.0176275	60.5964	-1.69257	4.5619e-05	40.035	-1.12829	0.0167154
PDLIM2_NM_176871	PDLIM2	NM_176871	ENSG00000120913	131.441	-0.468441	0.106641	85.0184	-0.323148	0.305566	95.7066	-1.09129	0.00461362	64.7824	-0.666193	0.0947635	88.8154	-1.42763	4.57674e-05	57.9648	-1.03751	0.017378
RAB27A_NM_183234	RAB27A	NM_183234	ENSG00000069974	79.5477	-0.57598	0.0941067	61.448	-0.379606	NA	55.5994	-1.45727	0.00160085	44.6399	-0.926107	0.0451752	52.4918	-1.76462	4.73171e-05	38.3305	-1.59616	0.00151403
ARHGAP9_NM_001080156	ARHGAP9	NM_001080156	ENSG00000123329	92.1533	-0.835691	0.0298737	104.548	-0.541753	0.107195	69.7891	-1.42798	0.000676615	74.3478	-1.21195	0.00170556	66.0616	-1.68095	4.75452e-05	67.4771	-1.68636	1.47472e-05
ENTPD1-AS1_NR_038444	ENTPD1-AS1	NR_038444	ENSG00000226688	81.6572	-0.819876	0.0329803	47.7319	-0.250434	NA	70.996	-0.852411	0.0521159	41.9286	-0.189984	0.655707	58.5969	-1.73291	4.81129e-05	37.9859	-0.446762	0.35959
UBAP2L_NM_001127320	UBAP2L	NM_001127320	ENSG00000143569	80.0372	-0.553931	0.100375	72.6651	-0.59503	NA	63.5175	-0.887155	0.037307	61.6589	-0.641614	0.10252	52.5828	-1.74833	4.93903e-05	52.3616	-1.27549	0.00401279
MIR6815_NR_106873	MIR6815	NR_106873	ENSG00000275167	70.729	-0.730757	0.0587199	68.3127	-0.682162	NA	49.0256	-1.77389	0.00012945	52.9576	-1.0592	0.0135063	48.7083	-1.81658	4.99936e-05	47.8259	-1.52079	0.00061402
WBP1L_NM_001083913	WBP1L	NM_001083913	ENSG00000166272	54.9289	-0.678699	NA	45.8665	-0.176259	NA	40.2946	-1.39604	0.00554904	34.5542	-0.522193	NA	35.8994	-2.05839	5.19963e-05	36.7228	-0.339492	0.491612
DUSP6_NM_001946	DUSP6	NM_001946	ENSG00000139318	125.639	-0.426311	0.134352	89.0962	-0.228369	0.420013	95.6175	-0.873995	0.0200619	67.2898	-0.568858	0.134586	83.2805	-1.45008	5.28655e-05	63.5492	-0.729435	0.0806496
CCDC26_NR_130918	CCDC26	NR_130918	ENSG00000229140	95.5345	-0.757299	0.0487274	69.5349	-0.747498	NA	70.941	-1.43678	0.000457105	57.4058	-0.917241	0.0299497	67.8043	-1.62367	5.2919e-05	52.3211	-1.29974	0.00266421
TYMP_NM_001113755	TYMP	NM_001113755	ENSG00000025708	97.6486	-0.630158	0.0695679	58.001	-0.177536	NA	75.6427	-1.06933	0.00897158	45.4044	-0.397028	0.336205	66.9422	-1.61504	5.31091e-05	40.3422	-0.734352	0.126264
RNF19A_NM_001280539	RNF19A	NM_001280539	ENSG00000034677	116.747	-0.681901	0.0581549	74.1487	-0.361495	NA	92.9895	-1.03387	0.0121564	61.0873	-0.477232	0.250637	82.8488	-1.55196	5.32588e-05	46.2468	-1.53901	0.00086461
MLC1_NM_139202	MLC1	NM_139202	ENSG00000100427	119.787	-0.431153	0.134606	83.6148	-0.24737	0.395137	89.2969	-0.965037	0.0141439	60.2289	-0.769555	0.0532651	78.5159	-1.5129	5.53014e-05	54.5378	-1.11542	0.0100408
RPL22_NM_000983	RPL22	NM_000983	ENSG00000116251	73.0947	-0.717759	0.0587199	60.9509	-0.356719	NA	55.4982	-1.30162	0.00320969	46.5397	-0.702192	0.0962822	50.7599	-1.75293	5.53841e-05	44.9836	-0.826566	0.068583
JUND_NM_001286968	JUND	NM_001286968	ENSG00000130522	120.696	-0.591284	0.0648199	95.1879	-0.262828	0.360323	95.2139	-0.940138	0.0124285	75.812	-0.457236	0.207049	83.6821	-1.4736	5.59944e-05	72.3856	-0.587335	0.129461
C21orf2_NM_001271440	C21orf2	NM_001271440	ENSG00000160226	92.637	-0.822498	0.0311815	15.5332	-0.178642	NA	70.6688	-1.40363	0.000752825	15.6031	0.0773137	NA	67.4776	-1.60188	5.63121e-05	15.0814	0.0655388	NA
C10orf91_NM_173541	C10orf91	NM_173541	ENSG00000180066	68.4761	-0.761059	NA	92.7871	-0.594439	0.0960086	55.4621	-1.04425	0.0194907	71.1339	-0.978815	0.0120801	47.5213	-1.79538	5.70227e-05	67.8562	-1.16691	0.00247815
PDE4A_NM_001243121	PDE4A	NM_001243121	ENSG00000065989	143.01	-0.716978	0.0322803	55.3104	-0.17607	NA	108.157	-1.25277	0.00182229	48.8991	-0.0796019	0.845702	105.34	-1.3697	5.7473e-05	46.514	-0.169454	0.719008
FES_NM_001143783	FES	NM_001143783	ENSG00000182511	107.85	-0.401924	0.154926	116.414	-0.280629	0.312117	81.7149	-0.858857	0.0293869	83.1854	-0.809505	0.0374379	69.2809	-1.55254	5.74762e-05	73.1047	-1.36651	0.000249167
MEF2D_NM_005920	MEF2D	NM_005920	ENSG00000116604	120.106	-0.484259	0.105175	113.125	-0.289127	0.307153	88.3535	-1.07136	0.00639846	78.3068	-0.966882	0.0104972	80.6486	-1.47088	5.99945e-05	73.7769	-1.19842	0.00127658
ALOX12_NM_000697	ALOX12	NM_000697	ENSG00000108839	80.0134	-0.589141	0.0857985	50.1765	-0.514595	NA	57.2807	-1.3445	0.00228728	36.7914	-1.04837	NA	53.0873	-1.72446	6.05494e-05	36.0554	-1.1261	0.0248439
ZKSCAN4_NM_001304506	ZKSCAN4	NM_001304506	ENSG00000187626	80.3759	-0.534185	0.111435	79.3027	-0.445641	0.1877	61.0432	-1.02812	0.0173952	60.5245	-0.836522	0.039805	52.6454	-1.71962	6.06113e-05	55.6938	-1.13718	0.0080047
GSN_NM_001258030	GSN	NM_001258030	ENSG00000148180	95.7164	-0.53156	0.10073	71.7064	-0.577141	NA	72.8268	-1.0078	0.0133243	56.5273	-0.866514	0.0346421	62.8134	-1.65432	6.1089e-05	49.9792	-1.34165	0.00230626
ARHGDIA_NM_001185077	ARHGDIA	NM_001185077	ENSG00000141522	94.1054	-0.505441	0.107656	90.8889	-0.396181	0.210755	66.2537	-1.30666	0.0018443	68.8546	-0.780239	0.044396	61.9732	-1.61162	6.14246e-05	67.372	-0.843844	0.0311617
JMJD1C-AS1_NR_027182	JMJD1C-AS1	NR_027182	ENSG00000272767	180.609	-0.247298	0.300796	222.378	-0.200334	0.385659	140.679	-0.574433	0.103239	154.506	-0.846903	0.00653635	115.425	-1.32569	6.22067e-05	145.79	-1.05637	0.000249988
CMTM3_NM_181553	CMTM3	NM_181553	ENSG00000140931	69.0073	-0.445124	0.158542	47.6414	-0.280424	NA	49.7837	-1.09161	0.0165246	37.0374	-0.524308	NA	42.6426	-1.85936	6.34126e-05	30.2734	-1.25857	0.0164401
NUP210_NM_024923	NUP210	NM_024923	ENSG00000132182	113.855	-0.283569	0.28123	117.619	-0.417423	0.164279	82.7953	-0.853263	0.0327182	82.7642	-1.09309	0.00317534	69.1783	-1.60015	6.55631e-05	85.0041	-0.940997	0.0125034
CFLAR_NM_001127183	CFLAR	NM_001127183	ENSG00000003402	158.737	-0.404382	0.137704	86.9468	-0.382127	0.242451	124.809	-0.735252	0.0436295	71.472	-0.487855	0.189284	106.119	-1.37405	6.67849e-05	64.5152	-0.819945	0.0409525
LILRB4_NM_001278426	LILRB4	NM_001278426	ENSG00000186818	121.846	-0.610853	0.0612912	64.4112	-0.269929	NA	91.7413	-1.18082	0.0022077	51.7067	-0.442823	0.287228	85.9072	-1.44378	6.69862e-05	44.8626	-0.909831	0.0566741
CMTM3_NR_037619	CMTM3	NR_037619	ENSG00000140931	68.2505	-0.512351	NA	49.4986	-0.27019	NA	50.1785	-1.10983	0.0148356	38.6777	-0.497234	NA	43.3501	-1.83684	6.97953e-05	31.2822	-1.26193	0.0151749
ODF3B_NM_001014440	ODF3B	NM_001014440	ENSG00000177989	74.7167	-0.523265	0.117564	93.5492	-0.561089	0.105725	55.5986	-1.08777	0.0149228	66.8577	-1.22921	0.00195558	47.9014	-1.80476	7.08781e-05	62.1037	-1.59471	5.99879e-05
FUT4_NM_002033	FUT4	NM_002033	ENSG00000196371	266.944	-0.305185	0.188342	278.83	-0.00807425	0.969581	214.909	-0.533224	0.103219	208.338	-0.35302	0.208444	180.493	-1.16328	7.19932e-05	177.466	-0.872314	0.00238648
C15orf39_NM_015492	C15orf39	NM_015492	ENSG00000167173	106.953	-0.447191	0.126372	115.179	-0.318491	0.275807	82.342	-0.857533	0.0278597	85.1026	-0.748737	0.04441	69.8253	-1.54686	7.19932e-05	78.2721	-1.0795	0.0035691
SMG9_NM_019108	SMG9	NM_019108	ENSG00000105771	124.361	-0.559257	0.0779051	101.324	-0.458661	0.15145	96.0415	-0.985369	0.008607	81.4097	-0.651653	0.0723464	84.1736	-1.52352	7.19932e-05	71.0607	-1.1558	0.00226161
C17orf62_NM_001193655	C17orf62	NM_001193655	ENSG00000178927	105.698	-0.523937	0.0996765	66.8133	-0.654372	NA	76.2387	-1.2331	0.00234283	55.3641	-0.805256	0.0495158	70.5312	-1.56884	7.23629e-05	47.7036	-1.40004	0.00154284
ZFAT_NM_001174157	ZFAT	NM_001174157	ENSG00000066827	118.488	-0.562136	0.0748342	90.2471	-0.232593	0.409179	92.3181	-0.964791	0.0115012	75.2881	-0.288812	0.416794	82.5444	-1.42688	7.23809e-05	66.5898	-0.656082	0.100767
PTTG1IP_NM_001286822	PTTG1IP	NM_001286822	ENSG00000183255	113.814	-0.480897	0.112093	26.4819	-0.343311	NA	86.0468	-0.969453	0.012524	23.149	-0.303774	NA	75.3699	-1.51881	7.27726e-05	21.2466	-0.551644	NA
HIST1H4J_NM_021968	HIST1H4J	NM_021968	ENSG00000197238	131.556	-0.443971	0.231472	76.1771	-0.309628	0.331303	99.9992	-0.953764	0.102058	61.4867	-0.480795	0.240788	91.2726	-1.59516	7.34246e-05	63.2196	-0.377391	0.376821
GSN-AS1_NR_103560	GSN-AS1	NR_103560	ENSG00000235865	92.9707	-0.518031	0.107192	70.0869	-0.447633	NA	70.2815	-1.01412	0.0137034	55.8326	-0.641143	0.130689	60.6102	-1.66263	7.34246e-05	46.7418	-1.35294	0.00271979
CDC42EP3_NM_001270437	CDC42EP3	NM_001270437	ENSG00000163171	124.423	-0.343961	0.193126	87.6457	-0.496892	0.138458	83.9847	-1.24992	0.00133345	64.986	-0.993935	0.0142166	80.2572	-1.44892	7.42921e-05	63.7716	-1.05263	0.0078734
TOB2_NM_016272	TOB2	NM_016272	ENSG00000183864	114.953	-0.743701	0.0329803	52.0919	-0.0758774	NA	85.3445	-1.40553	0.000314251	46.059	0.0250066	0.952355	81.9497	-1.55167	7.42921e-05	40.8453	-0.246847	0.608708
FLT3_NM_004119	FLT3	NM_004119	ENSG00000122025	174.363	-0.257045	0.277083	192.922	-0.1776	0.457434	132.925	-0.668652	0.0553317	145	-0.543248	0.0924509	112.986	-1.29298	7.44549e-05	128.422	-0.959877	0.00325317
GTF2A1_NM_201595	GTF2A1	NM_201595	ENSG00000165417	95.4368	-0.629882	0.071826	73.5393	-0.247663	NA	74.906	-1.03382	0.0137569	61.8596	-0.27844	0.463482	65.5607	-1.63122	7.44549e-05	53.9764	-0.694353	0.116909
KMT2E_NM_018682	KMT2E	NM_018682	ENSG00000005483	137.66	-0.573842	0.0648101	113.976	-0.424029	0.174072	108.315	-0.930713	0.0102419	91.7816	-0.604566	0.0916927	97.6123	-1.34326	7.44549e-05	82.783	-0.962747	0.00747831
SLC5A6_NM_021095	SLC5A6	NM_021095	ENSG00000138074	88.8426	-0.521186	0.107996	55.236	-0.176659	NA	68.1278	-0.97221	0.0209343	43.7222	-0.365062	0.376671	58.4687	-1.64824	7.62044e-05	39.5952	-0.655605	0.168376
SSBP4_NM_001009998	SSBP4	NM_001009998	ENSG00000130511	165.066	-0.420989	0.124192	76.5586	-0.324218	0.304833	124.216	-0.910819	0.00904654	60.0377	-0.567217	0.14667	111.307	-1.33044	7.63157e-05	58.629	-0.634749	0.12893
MIR23A_NR_029495	MIR23A	NR_029495	ENSG00000207980	154.591	-0.434519	0.116922	156.554	-0.347149	0.20572	115.287	-0.959156	0.00760789	111.62	-0.927751	0.00762248	104.45	-1.34807	7.64245e-05	103.093	-1.25935	0.000112334
S1PR3_NM_005226	S1PR3	NM_005226	ENSG00000213694	65.6296	-0.839982	NA	54.1399	-0.355915	NA	48.713	-1.53681	0.00113346	43.0288	-0.576636	0.200647	46.3738	-1.81699	7.67101e-05	38.7603	-0.901379	0.0665709
RASGRP2_NM_153819	RASGRP2	NM_153819	ENSG00000068831	95.4086	-0.567502	0.0831435	101.492	-0.472505	0.139465	68.056	-1.3407	0.00120683	73.7582	-1.03394	0.00712362	64.3522	-1.5868	7.67208e-05	67.3909	-1.44291	0.000179124
NREP_NM_001142476	NREP	NM_001142476	ENSG00000134986	69.3913	-0.650225	0.0785103	100.577	-0.158629	0.551126	53.3485	-1.14181	0.0149228	71.161	-0.712853	0.0636775	46.4559	-1.82923	7.67208e-05	67.6721	-0.894737	0.0286307
LRG1_NM_052972	LRG1	NM_052972	ENSG00000171236	141.173	-0.458214	0.116911	110.03	-0.367707	0.240791	109.449	-0.850039	0.024688	79.3515	-0.915983	0.0162657	94.7114	-1.43453	7.82705e-05	79.8504	-0.886013	0.0169876
STARD7_NM_020151	STARD7	NM_020151	ENSG00000084090	74.8598	-0.596067	0.0930897	48.5811	-0.184734	NA	58.2254	-1.02094	0.0215326	39.4827	-0.308677	0.467901	49.5517	-1.76746	7.82705e-05	34.4531	-0.706758	0.157683
ERI2_NM_001142725	ERI2	NM_001142725	ENSG00000196678	110.804	-0.522742	0.0931564	71.4976	-0.452705	NA	85.5059	-0.948972	0.0149228	55.7862	-0.755099	0.069884	75.7073	-1.46281	7.94406e-05	47.8496	-1.35198	0.00288095
OXA1L_NM_005015	OXA1L	NM_005015	ENSG00000155463	85.5256	-0.689226	0.0612912	59.6531	-0.341964	NA	72.1281	-0.844976	0.0437604	49.0078	-0.457078	0.260489	59.9111	-1.6712	7.94723e-05	42.2451	-0.941934	0.0418451
STAT6_NM_001178079	STAT6	NM_001178079	ENSG00000166888	70.9866	-0.56286	0.105175	30.9724	0.331218	NA	54.5108	-1.02209	0.0215326	23.0348	0.148163	NA	46.5275	-1.78121	7.98193e-05	23.6194	0.245499	NA
SUMF1_NM_001164674	SUMF1	NM_001164674	ENSG00000144455	65.6853	-0.395166	NA	49.4556	-0.334863	NA	47.8471	-0.992746	0.0309062	36.9633	-0.757637	NA	39.6493	-1.91783	7.98193e-05	35.0795	-0.942329	0.0576238
ALDOA_NM_001243177	ALDOA	NM_001243177	ENSG00000149925	91.6334	-0.580008	0.0801715	52.3725	0.0435841	NA	62.8404	-1.51024	0.000660829	44.4872	0.0816573	0.847888	61.6152	-1.61669	8.02383e-05	41.0331	-0.0817476	0.870582
LAIR1_NM_001289026	LAIR1	NM_001289026	ENSG00000167613	111.854	-0.483942	0.116668	155.755	-0.285153	0.297525	88.029	-0.827569	0.0376652	108.209	-0.961226	0.00629232	74.537	-1.54031	8.02383e-05	92.3531	-1.68734	1.29928e-06
TYROBP_NM_001173514	TYROBP	NM_001173514	ENSG00000011600	136.203	-0.469204	0.10631	118.069	-0.450583	0.142313	102.54	-0.979234	0.00822079	93.5449	-0.686922	0.0493232	92.8162	-1.37767	8.08414e-05	84.5246	-1.043	0.00352164
WDR34_NM_052844	WDR34	NM_052844	ENSG00000119333	104.797	-0.473084	0.116911	34.8536	-0.0351447	NA	79.2739	-0.957327	0.0153647	27.7213	-0.172935	NA	67.57	-1.62719	8.33105e-05	29.5278	-0.00913876	0.987626
MIR4674_NR_039821	MIR4674	NR_039821	ENSG00000265181	102.176	-0.487531	0.111582	43.3922	-0.194022	NA	70.7667	-1.34205	0.00129378	37.1535	-0.195253	NA	66.7498	-1.59997	8.35043e-05	32.6249	-0.516067	0.318802
PPCDC_NM_001301104	PPCDC	NM_001301104	ENSG00000138621	89.3097	-0.382844	0.203485	102.785	-0.586921	0.0924988	60.8313	-1.25758	0.00324978	72.8915	-1.30093	0.000807762	56.0465	-1.67151	8.40314e-05	69.8031	-1.49793	9.87387e-05
LINC01412_NR_110570	LINC01412	NR_110570	N/A	142.4	-0.353976	0.194791	160.069	-0.156994	0.528545	114.296	-0.603696	0.12885	118.583	-0.566154	0.110219	92.116	-1.46041	8.40314e-05	95.09	-1.45066	5.82539e-05
MIR27A_NR_029501	MIR27A	NR_029501	ENSG00000207808	152.543	-0.411095	0.127805	145.713	-0.363191	0.199153	114.626	-0.89996	0.0119665	106.68	-0.841981	0.0186365	100.647	-1.41035	8.4587e-05	97.4671	-1.21152	0.000283419
PRPF6_NM_012469	PRPF6	NM_012469	ENSG00000101161	86.2958	-0.650084	0.0656974	21.6415	-0.247151	NA	62.1265	-1.41761	0.000845541	20.4056	-0.070402	NA	59.4729	-1.61594	8.48134e-05	15.0871	-0.814809	NA
ITGAL_NM_001114380	ITGAL	NM_001114380	ENSG00000005844	126.71	-0.36241	0.185344	224.234	-0.310763	0.213237	95.0943	-0.847786	0.0288705	150.359	-1.15815	0.000292379	82.206	-1.4508	8.48592e-05	136.329	-1.63564	4.11536e-08
KDM4A_NM_014663	KDM4A	NM_014663	ENSG00000066135	65.8358	-0.678941	NA	44.8743	-0.18367	NA	52.902	-1.01301	0.0231174	35.6132	-0.379206	NA	44.9289	-1.78161	8.56414e-05	36.1427	-0.319417	0.521486
ZNF518A_NM_001278525	ZNF518A	NM_001278525	ENSG00000177853	100.973	-0.581688	0.075415	104.761	-0.348873	0.242451	74.3086	-1.23046	0.00347779	80.2765	-0.684524	0.0628432	69.8971	-1.50064	8.77126e-05	71.4588	-1.12849	0.00463217
ZKSCAN4_NM_019110	ZKSCAN4	NM_019110	ENSG00000187626	79.6828	-0.764925	0.0505588	50.6729	-0.393875	NA	61.6761	-1.25304	0.00353541	38.6798	-0.741513	NA	56.9009	-1.63728	8.98991e-05	39.7998	-0.675737	0.166395
HERPUD1_NM_001010989	HERPUD1	NM_001010989	ENSG00000051108	75.1688	-0.590695	0.0903031	61.5728	-0.354396	NA	56.9409	-1.09456	0.0146153	47.1132	-0.672036	0.120199	50.2482	-1.70506	9.03435e-05	46.8188	-0.716384	0.125802
TNFRSF1A_NM_001065	TNFRSF1A	NM_001065	ENSG00000067182	76.9231	-0.6919	0.0612912	99.3445	-0.378987	0.21919	58.0549	-1.26359	0.00381387	74.7646	-0.773323	0.0390614	52.6989	-1.71902	9.0581e-05	65.6937	-1.28151	0.000989345
LIMD2_NM_030576	LIMD2	NM_030576	ENSG00000136490	86.5073	-0.503875	0.115527	63.2838	-0.200504	NA	61.8245	-1.25273	0.00325099	44.7588	-0.752953	0.0789695	56.7371	-1.64616	9.0581e-05	40.553	-1.12541	0.016152
RAD52_NM_001297419	RAD52	NM_001297419	ENSG00000002016	100.749	-0.62811	0.0656974	37.7645	-0.554709	NA	80.4435	-0.947958	0.0210039	32.8577	-0.536627	NA	70.4916	-1.51122	9.16577e-05	36.7414	-0.25023	0.621315
PTPN7_NM_001199797	PTPN7	NM_001199797	ENSG00000143851	83.6758	-0.520421	0.117564	115.422	-0.775096	0.0389056	60.1128	-1.2516	0.00482532	83.9259	-1.46342	6.29835e-05	54.602	-1.71868	9.28328e-05	77.8021	-1.84802	1.08485e-06
GPBP1L1_NM_021639	GPBP1L1	NM_021639	ENSG00000159592	77.1499	-0.527396	0.115527	53.0212	-0.039317	NA	59.2616	-0.969839	0.0247003	47.6008	0.0991881	0.806029	50.5048	-1.70161	9.34014e-05	39.1464	-0.392655	0.416311
HNRNPUL1_NM_001301016	HNRNPUL1	NM_001301016	ENSG00000105323	157.365	-0.385129	0.146943	148.043	-0.507784	0.098551	121.286	-0.77479	0.0271198	111.173	-0.949073	0.00522777	106.509	-1.27788	9.34014e-05	101.869	-1.3109	6.2052e-05
DDX3X_NM_001193416	DDX3X	NM_001193416	ENSG00000215301	53.1104	-0.629786	NA	29.6569	-0.368447	NA	38.1816	-1.45545	0.00322592	22.855	-0.667464	NA	35.0286	-1.95018	9.38297e-05	21.609	-0.883139	NA
MIR155HG_NR_001458	MIR155HG	NR_001458	ENSG00000234883	99.0204	-0.507982	0.111492	103.217	-0.298605	0.303763	80.2722	-0.753667	0.0765733	78.448	-0.649443	0.0772048	66.0111	-1.58358	9.50264e-05	66.48	-1.27353	0.0010397
ATF5_NM_001193646	ATF5	NM_001193646	ENSG00000169136	107.445	-0.621664	0.0656974	124.462	-0.29182	0.323038	83.5824	-1.04028	0.0079997	93.6126	-0.665389	0.0615034	74.7551	-1.50349	9.54354e-05	77.7971	-1.39536	0.000176531
BSG_NM_198590	BSG	NM_198590	ENSG00000172270	138.892	-0.428015	0.137938	148.709	-0.426181	0.148317	107.794	-0.806812	0.0259273	118.141	-0.648495	0.0490042	92.3143	-1.41103	9.70899e-05	105.634	-1.05919	0.00137772
UNK_NM_001080419	UNK	NM_001080419	ENSG00000132478	89.6965	-0.551762	0.0992919	191.065	-0.565845	0.0665981	65.7405	-1.21613	0.00439979	141.529	-1.08655	0.000628052	60.6008	-1.59074	0.000103456	124.772	-1.67863	3.62244e-08
EFCAB2_NM_032328	EFCAB2	NM_032328	ENSG00000203666	211.58	-0.283846	0.235756	146.722	-0.49004	0.106884	165.526	-0.605632	0.0981399	115.272	-0.767335	0.0283392	137.699	-1.31876	0.000103515	99.9521	-1.34959	4.89458e-05
FDPS_NM_001135822	FDPS	NM_001135822	ENSG00000160752	68.737	-0.844912	NA	97.2784	-0.51325	0.127971	55.2989	-1.21921	0.00607278	71.6829	-1.03518	0.00762248	50.1043	-1.70846	0.000105456	67.805	-1.27075	0.000971632
CIDEB_NM_014430	CIDEB	NM_014430	ENSG00000136305	117.077	-0.622605	0.0600763	59.7726	-0.604992	NA	86.379	-1.25509	0.00151345	46.49	-0.947036	0.0326615	83.8166	-1.38333	0.000107142	46.4659	-0.960617	0.0344888
ANAPC13_NM_001242375	ANAPC13	NM_001242375	ENSG00000129055	93.1213	-0.69615	0.0581549	88.2845	-0.444617	0.175588	71.9662	-1.18824	0.00361321	69.1338	-0.721976	0.0797511	66.6237	-1.54692	0.000107142	57.9267	-1.46053	0.000418936
CLN3_NM_001042432	CLN3	NM_001042432	ENSG00000188603	68.9965	-0.402989	0.194349	64.5525	-0.480303	NA	47.3949	-1.24941	0.00775311	47.825	-0.940956	0.0341703	42.4383	-1.82122	0.000108188	44.9227	-1.21571	0.0073825
CCL23_NM_005064	CCL23	NM_005064	ENSG00000274736	80.4991	-0.516029	0.116922	46.2629	-0.372786	NA	57.0633	-1.29381	0.0039822	35.7721	-0.704308	NA	52.1763	-1.73337	0.000108188	29.5199	-1.42963	0.00684464
MRGBP_NM_018270	MRGBP	NM_018270	ENSG00000101189	91.4579	-0.446266	0.137938	27.7579	0.184775	NA	71.5545	-0.805066	0.0553317	18.4144	-0.284821	NA	59.6578	-1.57011	0.000108188	16.6535	-0.51056	NA
RFX3_NM_001282116	RFX3	NM_001282116	ENSG00000080298	86.7922	-0.599497	0.0770391	36.1167	-0.0842377	NA	65.6419	-1.14126	0.00674617	26.4989	-0.427989	NA	59.6578	-1.57011	0.000108188	26.2616	-0.447639	NA
ACTG1_NM_001199954	ACTG1	NM_001199954	ENSG00000184009	108.005	-0.623533	0.0612912	47.9326	0.107973	NA	84.8623	-1.00483	0.0111977	35.7196	-0.176852	NA	76.3553	-1.44203	0.000108602	35.7602	-0.139279	0.787018
PIGV_NM_017837	PIGV	NM_017837	ENSG00000060642	121.702	-0.494435	0.101373	113.676	-0.527307	0.11104	96.4574	-0.811002	0.0365009	83.4796	-1.08562	0.00569295	83.509	-1.39065	0.000108928	71.857	-1.85374	9.91528e-07
MS4A7_NM_021201	MS4A7	NM_021201	ENSG00000166927	85.8944	-0.739015	0.0581549	93.77	-0.79985	0.046908	66.7571	-1.22798	0.0056151	68.2436	-1.52241	0.000220808	61.0802	-1.66721	0.000109698	63.1604	-1.98043	1.65859e-06
UCP2_NM_003355	UCP2	NM_003355	ENSG00000175567	86.2058	-0.466432	0.132211	59.9686	-0.121613	NA	67.2865	-0.845417	0.0407492	42.3835	-0.638125	0.142054	56.0502	-1.6216	0.000109698	39.1355	-0.861381	0.0847251
LINC00926_NR_024433	LINC00926	NR_024433	ENSG00000247982	82.4747	-0.880789	0.0281225	84.1336	-0.674973	0.0797065	64.9436	-1.34427	0.00196146	62.2106	-1.25252	0.00262934	61.6161	-1.5969	0.000109698	58.4623	-1.5857	0.000156397
AP1S2_NM_001272071	AP1S2	NM_001272071	ENSG00000182287	66.6146	-0.615808	NA	17.2748	-0.174318	NA	47.0054	-1.46877	0.00163575	16.5282	0.0243869	NA	44.6523	-1.76068	0.000109698	15.7931	-0.0653548	NA
ZCCHC5_NM_152694	ZCCHC5	NM_152694	ENSG00000179300	68.0928	-0.57405	NA	63.9649	-0.558916	NA	50.7769	-1.19267	0.0116109	42.7195	-1.56181	0.000734198	44.785	-1.84235	0.000109698	41.1062	-1.7943	0.000176163
BTBD19_NM_001136537	BTBD19	NM_001136537	ENSG00000222009	117.805	-0.548832	0.0783577	153.155	-0.513103	0.0960086	85.5678	-1.23122	0.00164908	104.589	-1.38442	6.29835e-05	82.4311	-1.39628	0.000110169	97.1397	-1.77922	1.02543e-07
RPL7L1_NM_198486	RPL7L1	NM_198486	ENSG00000146223	96.2157	-0.589266	0.0762523	87.8221	-0.529433	0.138458	71.6696	-1.18483	0.00386218	73.2837	-0.635141	0.0981785	66.3688	-1.54376	0.000110399	64.7777	-1.09635	0.00994258
MIR4767_NR_039924	MIR4767	NR_039924	ENSG00000264268	49.7087	-0.608642	NA	27.5755	-0.43336	NA	34.1359	-1.58033	0.00221428	21.2733	-0.79164	NA	31.7988	-2.04057	0.000110537	22.6348	-0.640898	NA
RPL10_NM_001256577	RPL10	NM_001256577	ENSG00000147403	53.7625	-0.88581	NA	44.9109	-0.444141	NA	44.3322	-1.16048	0.0135702	35.0787	-0.740464	NA	38.3809	-1.86973	0.000110751	30.432	-1.24974	0.0189506
VIPR2_NM_001308259	VIPR2	NM_001308259	ENSG00000106018	89.5297	-0.527329	0.104954	25.8917	-0.0755884	NA	59.7767	-1.61039	0.000173531	25.3453	0.236575	NA	60.2411	-1.5653	0.000110794	21.4691	-0.103393	NA
NPEPL1_NM_024663	NPEPL1	NM_024663	ENSG00000215440	100.387	-0.377229	0.186377	48.9637	-0.239836	NA	69.3327	-1.21528	0.00421935	34.5617	-0.809091	NA	64.7623	-1.518	0.000111151	33.6277	-0.897143	0.0767194
MADD_NM_001135944	MADD	NM_001135944	ENSG00000110514	98.8493	-0.538552	0.0941067	35.2716	-0.322671	NA	71.9482	-1.21291	0.00309024	31.188	-0.272638	NA	67.3534	-1.51633	0.000111944	23.8704	-1.08908	NA
GTF2A1_NM_001278940	GTF2A1	NM_001278940	ENSG00000165417	82.328	-0.589356	0.0930897	85.6677	-0.269165	0.385659	63.1772	-1.06997	0.0143605	69.2825	-0.415661	0.273392	55.6285	-1.67041	0.000111944	60.3272	-0.874392	0.0411056
SUSD1_NM_001282640	SUSD1	NM_001282640	ENSG00000106868	102.205	-0.435841	0.137938	102.361	-0.482368	0.138458	74.2566	-1.0811	0.00739048	77.0434	-0.912348	0.0191064	67.3147	-1.50052	0.000111944	64.904	-1.69615	1.33757e-05
MIR5193_NR_049825	MIR5193	NR_049825	ENSG00000283726	67.4833	-0.749407	NA	83.593	-0.54293	0.124672	51.5048	-1.26598	0.00631313	54.4552	-1.63899	0.00010016	46.4983	-1.77986	0.000114133	59.5177	-1.22541	0.0025288
SPI1_NM_001080547	SPI1	NM_001080547	ENSG00000066336	86.3987	-0.482151	0.121992	141.432	-0.503186	0.105725	66.0943	-0.933722	0.0273604	104.66	-1.00655	0.0037469	56.2252	-1.62902	0.000114535	92.497	-1.57543	3.92953e-06
SIGLEC12_NM_053003	SIGLEC12	NM_053003	ENSG00000254521	102.84	-0.666761	0.0604985	71.6551	-0.429919	NA	75.6184	-1.34948	0.000740749	55.9122	-0.730152	0.0746792	73.3831	-1.46151	0.000114588	51.9903	-0.804684	0.204063
LTBR_NM_002342	LTBR	NM_002342	ENSG00000111321	78.9499	-0.539517	0.106641	63.7458	-0.317834	NA	57.2798	-1.1638	0.0140267	43.9883	-1.00224	0.0242456	52.3402	-1.64799	0.000115176	46.5526	-0.773395	0.0921366
ANAPC13_NM_001242374	ANAPC13	NM_001242374	ENSG00000129055	94.8688	-0.691777	0.0581549	86.3722	-0.440841	0.180865	73.4966	-1.17195	0.00395781	66.6531	-0.76486	0.0693353	68.0897	-1.52231	0.000115966	56.6906	-1.45325	0.000522072
WDR81_NM_001163809	WDR81	NM_001163809	ENSG00000167716	92.6416	-0.294806	0.286701	58.0367	-0.345495	NA	60.6671	-1.28366	0.00303426	44.2693	-0.660943	0.129179	56.3073	-1.63024	0.000116798	41.6449	-0.647154	0.353652
AFF3_NM_002285	AFF3	NM_002285	ENSG00000144218	83.3712	-0.693673	0.0587199	83.5656	-0.521425	0.137535	62.5703	-1.2849	0.00296468	62.6802	-0.9856	0.0185892	58.9509	-1.57777	0.000116798	57.3922	-1.36344	0.00105548
ARHGDIB_NM_001175	ARHGDIB	NM_001175	ENSG00000111348	121.031	-0.476435	0.117191	101.914	-0.375136	0.226463	91.9499	-0.810283	0.14822	69.9764	-1.13435	0.00486697	81.9596	-1.45601	0.000118967	65.5892	-1.44201	0.00032965
GNAQ_NM_002072	GNAQ	NM_002072	ENSG00000156052	164.008	-0.22452	0.334228	206.133	-0.276438	0.261254	118.085	-0.816123	0.0222656	154.873	-0.663255	0.0314071	105.137	-1.27109	0.000119179	132.547	-1.24712	4.9472e-05
MR1_NM_001194999	MR1	NM_001194999	ENSG00000153029	68.8479	-0.567763	0.105175	76.7025	-0.597899	0.11842	48.5796	-1.40532	0.0026983	59.7067	-0.946351	0.031992	45.289	-1.75866	0.00012141	50.1941	-1.79051	0.000101352
GNL3L_NM_001184819	GNL3L	NM_001184819	ENSG00000130119	58.2209	-0.543718	NA	26.9155	-0.704225	NA	42.7469	-1.19577	0.012524	23.5821	-0.754591	NA	37.3765	-1.87189	0.00012216	22.918	-0.886554	NA
PRDM1_NM_182907	PRDM1	NM_182907	ENSG00000057657	91.879	-0.502327	0.116911	45.4986	-0.296574	NA	66.8844	-1.16339	0.0105311	38.6225	-0.316638	NA	60.7553	-1.6076	0.000123076	31.0765	-1.02933	0.0558621
MFSD3_NM_138431	MFSD3	NM_138431	ENSG00000167700	163.482	-0.442196	0.106641	77.2147	-0.43402	0.200308	124.742	-0.896616	0.0115324	59.8138	-0.749974	0.0663088	114.267	-1.23523	0.000124332	56.6248	-0.943157	0.0282786
CYTH4_NM_013385	CYTH4	NM_013385	ENSG00000100055	107.904	-0.353475	0.195806	131.972	-0.11721	0.647367	77.2401	-1.01417	0.0114089	93.4976	-0.64593	0.0636739	69.4767	-1.47056	0.000125573	80.2983	-1.23275	0.000602944
CITED2_NM_006079	CITED2	NM_006079	ENSG00000164442	129.131	-0.466991	0.106641	85.8891	-0.346564	0.261162	92.6152	-1.17021	0.00210861	69.7972	-0.495705	0.180805	88.8793	-1.33736	0.000125573	61.0808	-0.934049	0.0207525
LFNG_NM_001166355	LFNG	NM_001166355	ENSG00000106003	68.7146	-0.728295	NA	61.09	-0.464029	NA	57.5476	-0.899195	0.0385328	49.819	-0.586341	0.171252	48.3516	-1.69436	0.000125573	48.8827	-0.673883	0.127769
GOLPH3_NM_022130	GOLPH3	NM_022130	ENSG00000113384	91.2217	-0.4673	0.12972	82.9239	-0.552531	0.12013	71.1414	-0.836394	0.0425412	66.8198	-0.756002	0.0518137	59.925	-1.55194	0.000130163	64.4688	-0.875984	0.0278532
ANKRD13D_NR_030767	ANKRD13D	NR_030767	ENSG00000172932	92.2857	-0.421777	0.149499	49.2387	-0.0611622	NA	70.4256	-0.854089	0.0368882	33.8497	-0.570013	NA	59.2489	-1.58057	0.000131278	30.818	-0.945467	0.0759151
CITED2_NM_001168389	CITED2	NM_001168389	ENSG00000164442	116.657	-0.442707	0.121992	84.57	-0.424826	0.19344	88.2775	-0.917507	0.0166208	65.7601	-0.739115	0.055969	77.5961	-1.43798	0.000131278	64.329	-0.816378	0.0432759
MIR619_NR_030350	MIR619	NR_030350	ENSG00000207622	76.1462	-0.741339	0.0581549	37.3457	-0.573943	NA	55.0989	-1.54169	0.000528922	31.8329	-0.640932	NA	54.1418	-1.65049	0.000131884	29.7459	-0.855305	0.104032
MAN1B1_NM_016219	MAN1B1	NM_016219	ENSG00000177239	64.7469	-0.675215	NA	38.0732	-0.345937	NA	49.8257	-1.16779	0.0105433	29.7148	-0.612456	NA	43.803	-1.76975	0.000131884	32.4843	-0.380464	0.460222
CAB39L_NM_001079670	CAB39L	NM_001079670	ENSG00000102547	104.066	-0.62757	0.0612912	51.37	-0.370282	NA	78.4445	-1.18418	0.00296468	47.1407	-0.213512	0.615787	73.7621	-1.43634	0.000134148	39.7017	-0.684756	0.156528
SEMA4A_NM_001193301	SEMA4A	NM_001193301	ENSG00000196189	86.8301	-0.683398	0.0587199	69.3847	-0.696814	NA	67.7736	-1.10078	0.0079997	55.1775	-0.982951	0.0186365	61.5342	-1.52954	0.000138075	55.278	-0.974509	0.0204903
LOC101928977_NR_125970	LOC101928977	NR_125970	N/A	79.4646	-0.539839	0.106641	106.748	-0.548228	0.10138	61.1474	-0.977366	0.0216039	72.8673	-1.42696	0.000241901	53.0775	-1.61398	0.000138923	71.8183	-1.50513	6.01618e-05
LOC374443_NR_002814	LOC374443	NR_002814	ENSG00000256594	119.04	-0.307884	0.244109	137.417	-0.328984	0.242497	84.8461	-0.970536	0.0147048	102.19	-0.763068	0.0299497	75.0647	-1.47387	0.000144645	94.6136	-1.0448	0.00236881
LINC00399_NR_126361	LINC00399	NR_126361	ENSG00000229792	53.0842	-0.869294	NA	46.635	-0.686911	NA	43.9178	-1.13114	0.0165246	36.7413	-1.03129	NA	38.124	-1.83122	0.000144794	35.9112	-1.13563	0.021883
C17orf105_NM_001136483	C17orf105	NM_001136483	ENSG00000231256	81.3206	-0.631191	0.0718825	38.5174	-0.19137	NA	61.0703	-1.20051	0.00473481	28.5663	-0.555819	NA	55.5797	-1.61697	0.000144794	29.836	-0.402995	0.458167
SRRM2_NM_016333	SRRM2	NM_016333	ENSG00000167978	117.366	-0.549265	0.0795409	54.3821	-0.475106	NA	88.9647	-1.06178	0.00539241	38.1279	-1.16129	NA	81.625	-1.40332	0.000147279	39.2748	-1.06529	0.0263961
PIGB_NM_004855	PIGB	NM_004855	ENSG00000069943	85.353	-0.495787	0.121812	91.7892	-0.532303	0.124672	67.8302	-0.810088	0.0624184	76.6457	-0.62009	0.0990493	56.2954	-1.61667	0.000147381	60.8139	-1.53579	0.000181245
METTL3_NM_019852	METTL3	NM_019852	ENSG00000165819	61.4416	-0.549269	NA	50.6227	-0.324665	NA	47.1824	-1.00361	0.0396896	39.8793	-0.568827	0.193212	39.8255	-1.82671	0.000148377	37.2373	-0.768793	0.117178
NSMAF_NM_003580	NSMAF	NM_003580	ENSG00000035681	203.725	-0.293875	0.214491	245.598	-0.26371	0.266808	156.921	-0.66702	0.0675339	184.75	-0.648416	0.036747	136.026	-1.2092	0.000156822	167.946	-0.988827	0.000510233
C14orf159_NM_001286471	C14orf159	NM_001286471	ENSG00000133943	84.6289	-0.706272	0.0583325	82.6514	-0.399164	0.21919	61.1572	-1.5348	0.000331956	61.5132	-0.840669	0.035764	60.5306	-1.54752	0.000157086	52.3729	-1.53681	0.000278742
RASSF1_NM_170713	RASSF1	NM_170713	ENSG00000068028	94.911	-0.505562	0.107656	52.2884	-0.0165317	NA	70.1292	-1.08833	0.00822079	37.5134	-0.42406	NA	64.0558	-1.49072	0.000157086	37.8699	-0.395083	0.416591
BIN2_NM_001290008	BIN2	NM_001290008	ENSG00000110934	108.422	-0.537216	0.0992919	109.22	-0.559844	0.10138	77.897	-1.25735	0.00176551	79.6432	-1.11601	0.00381669	74.5411	-1.43441	0.000157315	76.5142	-1.31924	0.000291714
ARID1B_NM_017519	ARID1B	NM_017519	ENSG00000049618	115.506	-0.222387	0.385538	151.759	-0.240433	0.348366	85.5543	-0.709971	0.0838405	111.241	-0.701985	0.0453755	70.7701	-1.46838	0.000158325	104.261	-0.932838	0.00691953
PIK3R5_NM_001142633	PIK3R5	NM_001142633	ENSG00000141506	85.992	-0.43037	0.157382	68.5498	-0.401116	NA	62.7017	-1.04678	0.015889	50.2222	-0.867717	0.0462787	54.145	-1.6867	0.00015881	48.1368	-1.02442	0.0258512
TMC8_NM_152468	TMC8	NM_152468	ENSG00000167895	84.3372	-0.673349	0.063863	81.3632	-0.699173	0.0726801	64.1595	-1.17161	0.00790094	62.9592	-1.08084	0.00731159	58.9618	-1.57192	0.00015881	59.4888	-1.33246	0.000941691
ANAPC13_NM_015391	ANAPC13	NM_015391	ENSG00000129055	94.8688	-0.691777	0.0581549	86.3722	-0.440841	0.180865	73.4966	-1.17195	0.00395781	66.6531	-0.76486	0.0693353	68.4385	-1.4957	0.00015881	56.6906	-1.45325	0.000522072
N4BP2_NM_018177	N4BP2	NM_018177	ENSG00000078177	163.202	-0.38734	0.137938	133.854	-0.343784	0.228288	119.121	-0.984687	0.00783325	100.947	-0.736556	0.04441	111.433	-1.22866	0.00015881	90.4767	-1.15606	0.00108397
NREP_NM_001142478	NREP	NM_001142478	ENSG00000134986	91.4628	-0.510458	0.11444	81.214	-0.162941	0.5716	70.5271	-0.944416	0.0273604	63.014	-0.417537	0.286348	61.2148	-1.57257	0.00015881	61.6423	-0.480324	0.272963
RRP1B_NM_015056	RRP1B	NM_015056	ENSG00000160208	80.6278	-0.598819	0.0801715	47.7824	-0.0737053	NA	57.0726	-1.37253	0.00325099	32.6277	-0.650145	NA	55.2312	-1.58046	0.000159102	34.9039	-0.467595	0.350907
SPN_NM_003123	SPN	NM_003123	ENSG00000197471	117.499	-0.389999	0.156048	151.614	-0.375507	0.179989	89.7513	-0.825151	0.033818	112.882	-0.813769	0.0171152	77.2178	-1.42125	0.000165312	96.462	-1.47383	1.48818e-05
NNT-AS1_NR_073113	NNT-AS1	NR_073113	ENSG00000248092	104.97	-0.546113	0.0882501	82.8299	-0.276185	0.368839	77.1705	-1.16833	0.00343104	58.5652	-0.863256	0.0387256	72.7966	-1.42788	0.000165312	54.8201	-1.13408	0.00967788
CEP350_NM_014810	CEP350	NM_014810	ENSG00000135837	72.6202	-0.726238	0.0581549	53.3652	-0.319147	NA	58.3796	-1.06082	0.0152935	41.647	-0.551356	0.219518	51.429	-1.62399	0.000168278	39.007	-0.778764	0.108754
ENO3_NM_001193503	ENO3	NM_001193503	ENSG00000108515	85.8109	-0.489738	0.121855	54.0119	-0.225835	NA	61.2512	-1.22182	0.00501559	44.8605	-0.288341	0.483398	56.3901	-1.60328	0.000171198	40.8553	-0.549777	0.246092
PHAX_NM_032177	PHAX	NM_032177	ENSG00000164902	65.2701	-0.483958	NA	34.1418	-0.162287	NA	44.3104	-1.43059	0.0026923	27.8665	-0.275601	NA	41.6099	-1.76097	0.000177168	27.384	-0.297834	0.586915
ITGA4_NM_000885	ITGA4	NM_000885	ENSG00000115232	127.292	-0.477318	0.107996	192.136	-0.387664	0.151769	90.9019	-1.21969	0.00194681	144.876	-0.790996	0.0140147	87.4423	-1.38213	0.000180393	130.334	-1.20275	7.52675e-05
C20orf24_NM_001199534	C20orf24	NM_001199534	ENSG00000101084	76.2022	-0.50024	0.123098	41.2467	-0.439519	NA	59.4097	-0.889688	0.0401345	40.8435	-0.0714874	0.866894	49.9735	-1.64764	0.000180393	35.2154	-0.457551	0.357715
OR6C4_NM_001005494	OR6C4	NM_001005494	ENSG00000179626	46.0776	-0.952975	NA	51.0951	-0.882471	NA	38.5513	-1.20881	0.0152741	39.2353	-1.38447	0.00352343	33.7788	-1.89145	0.000180567	39.9751	-1.32972	0.00457922
ANKRD18DP_NR_003291	ANKRD18DP	NR_003291	ENSG00000226435	97.5716	-0.506344	0.116911	90.5172	-0.410429	0.19993	67.1179	-1.40508	0.000958125	70.0639	-0.713407	0.0612699	64.0854	-1.59309	0.000180567	63.3855	-1.09478	0.00595778
H2AFY_NM_001040158	H2AFY	NM_001040158	ENSG00000113648	283.55	-0.23206	0.278632	288.633	-0.0676449	0.74326	231.686	-0.40064	0.191879	211.493	-0.494297	0.0893943	190.536	-1.06907	0.000181262	180.515	-1.05387	0.000206093
NINJ2_NM_001294345	NINJ2	NM_001294345	ENSG00000171840	84.7223	-0.446791	0.146898	75.8046	-0.480073	0.167368	61.5119	-1.07655	0.0147555	47.7962	-1.69418	0.00016834	53.5097	-1.70495	0.000186703	48.7089	-1.62218	0.000294277
LOC153684_NR_015447	LOC153684	NR_015447	ENSG00000215068	136.048	-0.555142	0.0753713	132.384	-0.322147	0.261907	108.241	-0.870353	0.0209847	106.998	-0.488768	0.168815	96.9766	-1.3095	0.000186703	104.941	-0.535264	0.139073
IMPACT_NM_018439	IMPACT	NM_018439	ENSG00000154059	65.1477	-0.820073	NA	77.3652	-0.421512	0.19993	53.7162	-1.07338	0.0224219	53.0741	-1.20276	0.00498799	47.4409	-1.66624	0.000189713	48.8156	-1.57849	0.00032793
WIBG_NM_032345	WIBG	NM_032345	ENSG00000170473	86.0394	-0.604453	0.0770391	81.348	-0.338378	0.278246	66.0477	-1.07633	0.0107897	61.5446	-0.707899	0.0705695	59.9248	-1.52086	0.000191039	52.6126	-1.32089	0.00172413
LOC102723701_NR_125821	LOC102723701	NR_125821	ENSG00000183154	95.8471	-0.506739	0.106641	158.334	-0.55066	0.0810008	75.3751	-0.862646	0.0380086	111.494	-1.27774	0.000178179	65.2554	-1.45991	0.000192591	107.235	-1.46245	4.93005e-06
MKS1_NM_017777	MKS1	NM_017777	ENSG00000011143	73.6456	-0.789473	0.0510448	46.0611	-0.482934	NA	63.4471	-0.849204	0.0491316	37.1673	-0.673062	NA	52.8337	-1.63786	0.000193319	34.9061	-0.85869	0.094847
RPL10_NM_001303626	RPL10	NM_001303626	ENSG00000147403	50.5356	-0.730835	NA	50.6765	-0.601441	NA	39.4533	-1.19032	0.0145272	38.337	-1.05039	NA	34.3434	-1.87581	0.000193319	35.1715	-1.40083	0.00546795
SNX20_NM_001144972	SNX20	NM_001144972	ENSG00000167208	89.2788	-0.732909	0.0572543	95.7897	-0.470613	0.148424	64.1786	-1.5788	0.000295071	64.883	-1.33961	0.00121038	65.0376	-1.50516	0.000194267	62.3658	-1.53117	0.000132758
CABLES1_NM_001100619	CABLES1	NM_001100619	ENSG00000134508	95.0614	-0.317866	0.248434	112.818	-0.276701	0.328787	67.7284	-0.984992	0.0179254	80.9003	-0.820984	0.0299132	59.414	-1.54302	0.00019805	74.6563	-1.11592	0.0027039
PLXNB2_NM_012401	PLXNB2	NM_012401	ENSG00000196576	71.8434	-0.531961	0.113543	69.4293	-0.342092	NA	56.8959	-0.853769	0.0518077	52.7907	-0.667075	0.120199	46.4269	-1.73135	0.000200683	45.4991	-1.25705	0.00596403
ATF5_NM_001290746	ATF5	NM_001290746	ENSG00000169136	120.907	-0.283476	0.30082	48.8836	0.147072	NA	90.9128	-0.720722	0.0667538	43.953	0.322909	0.431519	76.0588	-1.42945	0.00020105	42.7774	0.312596	0.500942
TRIM16_NM_006470	TRIM16	NM_006470	ENSG00000221926	71.3449	-0.363663	0.314224	45.4671	-0.461042	NA	46.3202	-1.69448	0.000804025	34.0568	-1.21571	NA	45.1857	-1.85432	0.000204005	31.686	-1.64864	0.00251258
WDR81_NM_001163811	WDR81	NM_001163811	ENSG00000167716	98.8	-0.371951	0.188342	56.5848	-0.276387	NA	66.5772	-1.29569	0.00202206	40.1829	-0.797393	0.0782238	63.4424	-1.49399	0.000209998	37.3126	-0.71789	0.321251
GNB1L_NM_053004	GNB1L	NM_053004	ENSG00000185838	81.595	-0.410311	0.170753	39.6627	-0.0843937	NA	57.4787	-1.15031	0.00822079	27.2181	-0.62048	NA	51.8596	-1.60791	0.000209998	31.237	-0.235573	0.655489
BST2_NM_004335	BST2	NM_004335	ENSG00000130303	131.093	-0.528248	0.0801715	93.6542	-0.267861	0.359503	99.6469	-1.00801	0.00639165	66.8943	-0.809652	0.0373105	92.5009	-1.29129	0.000210454	66.5481	-0.821399	0.036343
CTDSP1_NM_001206878	CTDSP1	NM_001206878	ENSG00000144579	127.79	-0.467988	0.11322	162.455	-0.275048	0.296742	89.2307	-1.28446	0.000752825	113.161	-0.932752	0.00569258	86.4328	-1.38039	0.000210454	96.493	-1.67233	5.19188e-07
ST8SIA6_NM_001004470	ST8SIA6	NM_001004470	ENSG00000148488	118.579	-0.380404	0.178069	122.6	-0.41526	0.172135	85.8675	-1.01925	0.0140409	87.7707	-1.02452	0.00585811	78.3029	-1.4092	0.000212158	80.6405	-1.40973	0.000110636
HNRNPH3_NM_012207	HNRNPH3	NM_012207	ENSG00000096746	102.052	-0.367425	0.195876	108.368	-0.200717	0.446014	74.4345	-0.957733	0.0184137	78.0355	-0.705109	0.0549173	66.219	-1.44958	0.000212903	71.802	-0.994479	0.00876869
LOC100506476_NR_109995	LOC100506476	NR_109995	ENSG00000259065	113.817	-0.40308	0.171058	106.067	-0.352891	0.261027	82.9243	-1.01457	0.00955128	82.4037	-0.649481	0.0957377	75.9673	-1.37431	0.000212903	74.5197	-1.00624	0.0125795
RFX8_NM_001145664	RFX8	NM_001145664	ENSG00000196460	115.236	-0.515955	0.0941067	175.383	-0.425011	0.138458	95.34	-0.684107	0.075419	130.991	-0.867039	0.011655	80.4239	-1.34971	0.000213519	115.306	-1.4165	1.02925e-05
RAB27A_NM_004580	RAB27A	NM_004580	ENSG00000069974	78.6411	-0.472483	0.136258	66.2819	-0.432263	NA	52.8055	-1.47325	0.00173394	46.8975	-1.09742	0.0168221	51.5414	-1.60157	0.000213657	41.4162	-1.68623	0.000483358
INPP5D_NM_001017915	INPP5D	NM_001017915	ENSG00000168918	75.5054	-0.586646	0.0944253	126.531	-0.336428	0.243606	59.5967	-0.922439	0.039504	99.2535	-0.585747	0.0846999	51.2112	-1.62211	0.000213657	82.8786	-1.24468	0.000598444
NMUR1_NM_006056	NMUR1	NM_006056	ENSG00000171596	91.6893	-0.438226	0.143208	90.6235	-0.341122	0.265078	64.534	-1.20213	0.00421935	64.9334	-0.915477	0.0219288	58.891	-1.58217	0.000219507	58.2542	-1.35428	0.00104551
FADS2_NM_004265	FADS2	NM_004265	ENSG00000134824	124.315	-0.455909	0.121812	108.405	-0.339544	0.254623	88.1009	-1.18663	0.0026983	78.599	-0.861016	0.0219184	82.9058	-1.42381	0.0002236	64.7377	-1.69736	3.1181e-05
CHFR_NM_001161344	CHFR	NM_001161344	ENSG00000072609	96.2954	-0.606234	0.071826	43.0433	-0.102796	NA	71.7689	-1.21327	0.00358785	33.8963	-0.299695	NA	68.1137	-1.44542	0.000223727	35.1682	-0.181993	0.736852
BLOC1S5_NM_001199322	BLOC1S5	NM_001199322	ENSG00000188428	55.6143	-0.6941	NA	38.314	-0.164745	NA	42.9261	-1.19416	0.0119665	29.7754	-0.40765	NA	38.3296	-1.77385	0.00022652	27.7198	-0.612858	0.254516
SRRD_NM_001013694	SRRD	NM_001013694	ENSG00000100104	66.6784	-0.621	NA	44.9485	0.00365925	NA	54.2314	-0.88247	0.0495169	35.0846	-0.195245	NA	44.7055	-1.70966	0.000227456	30.0436	-0.59993	0.253945
HEXIM1_NM_006460	HEXIM1	NM_006460	ENSG00000186834	111.017	-0.468239	0.115527	78.6	-0.578885	0.106884	89.0767	-0.724494	0.0607215	60.4596	-0.960949	0.0206972	75.5372	-1.37512	0.000228583	55.412	-1.31793	0.00144731
BATF_NM_006399	BATF	NM_006399	ENSG00000156127	59.1154	-0.576357	NA	61.7456	-0.308432	NA	44.3996	-1.14983	0.0193652	47.7353	-0.591298	0.156786	38.7093	-1.83727	0.000228846	45.8203	-0.742644	0.106685
PECAM1_NM_000442	PECAM1	NM_000442	ENSG00000261371	75.0869	-0.586563	0.0931564	87.496	-0.774612	0.0472032	54.6522	-1.26365	0.00551173	74.8648	-0.783696	0.0381117	51.0402	-1.60687	0.000228846	67.0186	-1.19805	0.0024376
ATP5A1_NM_001001935	ATP5A1	NM_001001935	ENSG00000152234	75.1656	-0.538297	0.107656	87.9015	-0.306262	0.306939	56.0069	-1.08943	0.0154532	65.5337	-0.698607	0.0786165	50.3103	-1.61848	0.000229123	62.4584	-0.864127	0.0343065
NREP_NM_001142477	NREP	NM_001142477	ENSG00000134986	75.7064	-0.446959	0.156931	94.6309	-0.188789	0.492722	55.2754	-1.06711	0.0194397	69.4198	-0.629981	0.101379	48.61	-1.66391	0.000229739	64.6045	-0.878106	0.0324669
TEX41_NR_033870	TEX41	NR_033870	ENSG00000226674	100.81	-0.22513	0.402768	119.904	-0.157387	0.637131	67.7687	-1.08362	0.0137569	82.5455	-0.85665	0.0368927	61.4522	-1.52456	0.000231693	69.5651	-1.61768	0.000138596
C22orf29_NM_024627	C22orf29	NM_024627	ENSG00000215012	76.4125	-0.404678	0.183809	41.5272	-0.0146396	NA	54.3038	-1.10399	0.0126452	28.0064	-0.570193	NA	48.0471	-1.6468	0.000235206	32.8088	-0.130392	0.807673
FNDC3A_NM_001278438	FNDC3A	NM_001278438	ENSG00000102531	90.4162	-0.379643	0.19051	37.768	-0.189601	NA	71.06	-0.7172	0.0765733	34.5989	-0.0338238	NA	58.6125	-1.50845	0.000235498	29.2065	-0.450062	0.395093
SLC12A6_NM_001042497	SLC12A6	NM_001042497	ENSG00000140199	104.906	-0.300554	0.292461	82.2389	-0.276566	0.365738	69.1379	-1.26848	0.00258726	61.463	-0.663418	0.0894574	65.0197	-1.5224	0.00023574	49.4748	-1.54209	0.000360997
EXOC7_NM_001282313	EXOC7	NM_001282313	ENSG00000182473	77.5154	-0.510121	0.116911	47.8078	0.109566	NA	53.9405	-1.36789	0.00247922	30.4562	-0.588737	NA	51.6022	-1.58853	0.000238056	30.8499	-0.56939	0.279787
TOLLIP_NM_019009	TOLLIP	NM_019009	ENSG00000078902	81.9642	-0.428139	0.162455	28.9506	-0.23434	NA	60.8635	-0.970294	0.0244773	23.7352	-0.340283	NA	52.168	-1.62373	0.000242599	23.9361	-0.342651	NA
RPL13A_NM_001270491	RPL13A	NM_001270491	ENSG00000142541	118.41	-0.38853	0.159437	134.374	-0.263129	0.341223	85.7266	-1.02001	0.00923713	102.475	-0.579048	0.0920757	78.9586	-1.36239	0.000242599	98.0157	-0.70756	0.0436295
RRM2_NM_001165931	RRM2	NM_001165931	ENSG00000171848	109.911	-0.252488	0.327588	59.6709	-0.221443	NA	75.4588	-1.02819	0.0104595	49.0028	-0.309742	0.448671	68.6392	-1.4184	0.000242599	45.7237	-0.484821	0.301913
NCL_NM_005381	NCL	NM_005381	ENSG00000115053	73.8569	-0.490701	0.132123	70.2242	-0.467305	NA	51.2921	-1.32143	0.00361321	52.1122	-0.956298	0.0244542	48.4759	-1.61723	0.000244596	47.633	-1.31693	0.00312835
FNBP1_NM_015033	FNBP1	NM_015033	ENSG00000187239	79.3341	-0.438845	0.15069	67.5433	-0.197291	NA	60.2255	-0.912549	0.0330367	52.6295	-0.43605	0.277869	50.8867	-1.62261	0.000244596	44.1797	-1.02948	0.0246329
NCOR1_NM_006311	NCOR1	NM_006311	ENSG00000141027	144.56	-0.490431	0.0930897	109.498	-0.188928	0.477002	110.129	-0.950387	0.00916425	80.6439	-0.608211	0.0912639	102.728	-1.22677	0.000246722	70.4418	-1.08801	0.00465966
C15orf40_NM_001160113	C15orf40	NM_001160113	ENSG00000169609	67.2587	-0.834345	NA	31.0752	-0.251639	NA	53.9523	-1.21735	0.00601511	26.5349	-0.282595	NA	49.7978	-1.60492	0.000247034	25.6893	-0.350984	NA
ZNF655_NM_001009958	ZNF655	NM_001009958	ENSG00000197343	90.1122	-0.447678	0.140798	67.3386	-0.149241	NA	69.2424	-0.85738	0.0416591	51.8785	-0.419189	0.315975	59.444	-1.50425	0.000253041	50.0512	-0.51231	0.244967
FES_NM_002005	FES	NM_002005	ENSG00000182511	86.7619	-0.536212	0.102618	122.513	-0.409366	0.172016	71.487	-0.733078	0.0737988	86.9708	-1.03384	0.00470046	59.3721	-1.48398	0.000254555	79.154	-1.45492	5.52306e-05
COX20_NM_001312871	COX20	NM_001312871	ENSG00000203667	113.583	-0.511692	0.102618	47.3267	-0.113172	NA	91.3519	-0.771448	0.0632979	36.6225	-0.359022	NA	78.0422	-1.42477	0.000257248	36.2744	-0.366358	0.458404
NLRP3_NM_001079821	NLRP3	NM_001079821	ENSG00000162711	109.883	-0.425508	0.142579	100.431	-0.282747	0.331303	83.3917	-0.872788	0.029478	75.0954	-0.681431	0.074331	72.8934	-1.4223	0.000257248	64.5193	-1.27028	0.00123885
FKBP2_NM_004470	FKBP2	NM_004470	ENSG00000173486	86.9722	-0.649891	0.0649435	24.3378	-0.306601	NA	73.3526	-0.773261	0.0556271	19.3244	-0.524635	NA	60.6856	-1.52802	0.000257248	21.4488	-0.279317	NA
FES_NM_001143785	FES	NM_001143785	ENSG00000182511	86.3166	-0.509052	0.111216	121.138	-0.424593	0.16314	70.8414	-0.714456	0.0817558	86.2732	-1.04055	0.00469741	58.3883	-1.49273	0.000257248	79.0636	-1.42859	7.40797e-05
APOC2_NM_000483	APOC2	NM_000483	ENSG00000234906	106.868	-0.475422	0.121812	144.741	-0.506029	0.109542	76.0367	-1.20893	0.00316313	113.931	-0.784169	0.0268363	71.6428	-1.45046	0.000257248	100.969	-1.26055	0.000225825
MIR5571_NR_049835	MIR5571	NR_049835	ENSG00000264824	69.5169	-0.896547	0.0298737	56.241	-0.790478	NA	54.9346	-1.33212	0.00353541	39.2011	-1.71912	0.000255158	52.0961	-1.59971	0.000257248	44.0648	-1.19918	0.00925101
GDI2_NM_001115156	GDI2	NM_001115156	ENSG00000057608	104.294	-0.557848	0.0857985	62.665	-0.178799	NA	73.5683	-1.37556	0.000884897	49.5016	-0.376647	0.348043	72.8417	-1.40568	0.000258129	41.8753	-0.905094	0.0526708
CNPY3_NM_006586	CNPY3	NM_006586	ENSG00000137161	107.772	-0.404419	0.165085	75.3035	-0.263747	0.380825	86.3708	-0.667355	0.0939343	57.8853	-0.576394	0.141387	71.1994	-1.43827	0.000258745	47.9434	-1.27159	0.00375552
ABHD14A-ACY1_NR_037192	ABHD14A-ACY1	NR_037192	N/A	104.06	-0.486114	0.110503	64.6703	-0.254361	NA	75.0132	-1.17685	0.00395781	46.7964	-0.722947	0.0894574	68.8434	-1.51166	0.000267546	40.3506	-1.28689	0.00658903
S100A6_NM_014624	S100A6	NM_014624	ENSG00000197956	68.9553	-0.599836	0.0930897	52.3461	-0.200518	NA	58.3335	-0.706614	0.100065	39.1315	-0.548992	0.211822	46.6533	-1.63246	0.000271439	37.6842	-0.677093	0.161981
SNORA24_NR_002963	SNORA24	NR_002963	ENSG00000275994	72.0848	-0.58383	0.0941067	57.3543	-0.0791166	NA	53.1354	-1.21998	0.0076513	45.7268	-0.242775	0.562098	49.1731	-1.59343	0.000274635	45.5055	-0.223626	0.634796
MYL6_NM_021019	MYL6	NM_021019	ENSG00000092841	76.9823	-0.542079	0.106641	52.7669	-0.135902	NA	57.3069	-1.11486	0.0111241	42.2534	-0.281171	0.499527	51.4292	-1.59214	0.000275852	38.6047	-0.542052	0.267396
COX20_NM_198076	COX20	NM_198076	ENSG00000203667	113.239	-0.510643	0.105114	47.2786	-0.0716551	NA	90.6352	-0.785811	0.0618074	35.8727	-0.36103	NA	77.8579	-1.42005	0.000275952	35.6144	-0.363616	0.464857
CEP63_NM_001042383	CEP63	NM_001042383	ENSG00000182923	84.4765	-0.466695	0.135121	83.3875	-0.601314	0.0966157	64.7976	-0.90372	0.0434167	63.3396	-1.04387	0.0104764	56.1339	-1.52217	0.000276979	58.2695	-1.42416	0.00087993
CEP63_NM_001042400	CEP63	NM_001042400	ENSG00000182923	84.757	-0.45168	0.142579	96.408	-0.673306	0.0726801	66.186	-0.808317	0.0717705	75.0703	-1.0475	0.00664201	55.8767	-1.53157	0.00028144	69.0641	-1.42651	0.000251428
CCDC88C_NM_001080414	CCDC88C	NM_001080414	ENSG00000015133	95.209	-0.468267	0.124192	64.1231	-0.428142	NA	69.4562	-1.11114	0.00674617	49.3361	-0.766887	0.069067	64.0272	-1.44809	0.00028185	44.2822	-1.17343	0.010513
TLR2_NM_003264	TLR2	NM_003264	ENSG00000137462	63.8559	-0.684466	NA	80.8406	-0.572267	0.109542	49.6019	-1.12311	0.0149495	61.9709	-0.964208	0.0173146	44.1314	-1.6744	0.000282658	59.8804	-1.08572	0.00830239
IFT74_NM_001099224	IFT74	NM_001099224	ENSG00000096872	75.839	-0.695633	0.0617975	48.2581	-0.103467	NA	65.2408	-0.773561	0.0687552	33.2785	-0.663331	NA	54.0633	-1.56153	0.000286039	31.6828	-0.843643	0.104721
FDPS_NM_001135821	FDPS	NM_001135821	ENSG00000160752	59.2152	-0.915878	NA	104.625	-0.485328	0.136586	47.5309	-1.35173	0.00347414	75.3376	-1.08642	0.00436715	44.838	-1.65461	0.000286706	70.8755	-1.3561	0.000292248
LINC01366_NR_026945	LINC01366	NR_026945	ENSG00000235172	85.0145	-0.505465	0.116017	62.2145	-0.502267	NA	70.6346	-0.671094	0.117765	51.6023	-0.610848	0.136287	55.9606	-1.59506	0.000291988	47.0306	-0.89962	0.0513149
CDK6_NM_001145306	CDK6	NM_001145306	ENSG00000105810	197.43	-0.10266	0.650928	230.375	0.0108994	0.961151	153.479	-0.410931	0.248167	172.929	-0.319108	0.273448	123.076	-1.19657	0.000293178	135.678	-1.1702	0.000100371
TCEB2_NM_007108	TCEB2	NM_007108	ENSG00000103363	114.338	-0.452049	0.120427	34.301	-0.00488518	NA	86.686	-0.920756	0.0170238	26.5003	-0.223267	NA	78.1919	-1.33069	0.000294486	25.2673	-0.337104	NA
SLC25A10_NM_001270888	SLC25A10	NM_001270888	ENSG00000183048	103.102	-0.42563	0.140877	52.3824	-0.0630064	NA	66.8893	-1.58829	0.000132608	38.3039	-0.415059	NA	68.8961	-1.39818	0.000299374	34.9712	-0.708048	0.157658
SNRNP200_NM_014014	SNRNP200	NM_014014	ENSG00000144028	79.6998	-0.44585	0.145057	43.0729	0.0183153	NA	57.7375	-1.09181	0.0119665	34.2053	-0.137323	NA	52.2795	-1.54144	0.000299745	33.9686	-0.137701	0.794481
TAPBPL_NM_018009	TAPBPL	NM_018009	ENSG00000139192	114.382	-0.544475	0.0801715	110.479	-0.503689	0.127689	84.6548	-1.1532	0.00330206	85.0921	-0.864983	0.0183082	79.7407	-1.36889	0.000300735	71.5797	-1.62684	1.60462e-05
CDC37L1_NM_017913	CDC37L1	NM_017913	ENSG00000106993	83.203	-0.354961	0.236342	35.9019	-0.0124409	NA	65.4349	-0.673824	0.122785	24.0478	-0.602229	NA	52.2689	-1.60401	0.000301334	24.8466	-0.521948	NA
SRP19_NM_001204193	SRP19	NM_001204193	ENSG00000153037	59.2011	-0.514953	NA	31.6594	-0.0304313	NA	46.0073	-0.942231	0.0512382	23.9842	-0.292498	NA	38.4433	-1.77236	0.000302645	22.5495	-0.462887	NA
EXOC7_NM_001013839	EXOC7	NM_001013839	ENSG00000182473	80.5321	-0.531671	0.107485	51.6176	0.129324	NA	54.5051	-1.53928	0.00054725	34.2453	-0.460402	NA	54.5764	-1.51684	0.000304388	33.8896	-0.502078	0.326479
BUD13_NM_001159736	BUD13	NM_001159736	ENSG00000137656	62.7503	-0.640699	NA	47.6361	-0.457561	NA	45.4874	-1.38601	0.00324218	45.5867	-0.178931	0.666279	42.8924	-1.66981	0.000312194	41.5823	-0.386849	0.417893
POGLUT1_NM_152305	POGLUT1	NM_152305	ENSG00000163389	80.279	-0.551886	0.106641	53.8407	-0.357856	NA	59.689	-1.13844	0.0141117	36.311	-1.10797	NA	54.4527	-1.56824	0.00031952	34.812	-1.29012	0.0130363
ATG16L1_NM_001190266	ATG16L1	NM_001190266	ENSG00000085978	119.331	-0.305845	0.243306	49.9973	-0.423199	NA	83.3448	-1.04297	0.0083245	43.2812	-0.39293	0.347924	77.5138	-1.35006	0.000319869	37.4657	-0.833155	0.0887775
MIR6800_NR_106858	MIR6800	NR_106858	ENSG00000284114	115.846	-0.463935	0.214491	141.852	-0.669123	0.056857	85.0111	-1.36641	0.000676615	99.1283	-1.49763	2.22617e-05	83.8994	-1.38727	0.000320464	95.8608	-1.68571	6.79623e-07
CD300C_NM_006678	CD300C	NM_006678	ENSG00000167850	83.7095	-0.672442	0.0648101	64.1009	-0.576274	NA	63.0009	-1.23867	0.00473481	50.5766	-0.862254	0.0410282	59.7094	-1.49563	0.000327651	46.1585	-1.22034	0.00653677
SMDT1_NM_033318	SMDT1	NM_033318	ENSG00000183172	83.7543	-0.55865	0.10073	50.6344	-0.256626	NA	63.8432	-1.04595	0.0157961	43.9278	-0.217393	0.598306	57.5999	-1.49357	0.000327651	36.0484	-0.810062	0.102207
GTF2I_NM_001163636	GTF2I	NM_001163636	ENSG00000263001	104.156	-0.64619	0.0604985	89.1951	-0.471762	0.156509	83.8803	-0.938198	0.017638	67.2756	-0.898463	0.0262936	75.4663	-1.362	0.000329116	67.6987	-0.872728	0.0296758
MPDU1_NM_004870	MPDU1	NM_004870	ENSG00000129255	118.717	-0.250208	0.317593	119.777	-0.460125	0.138889	85.0634	-0.869669	0.0244773	91.444	-0.837579	0.022001	74.7696	-1.36962	0.000331415	79.927	-1.40622	0.000117983
C11orf21_NM_001142946	C11orf21	NM_001142946	ENSG00000110665	70.1102	-0.591072	0.100375	89.4321	-0.200254	0.480683	57.3681	-0.820589	0.0609934	62.0376	-0.82126	0.0392835	47.8014	-1.60202	0.000333319	62.1187	-0.791348	0.0537975
DDX6_NM_001257191	DDX6	NM_001257191	ENSG00000110367	115.763	-0.390897	0.155527	89.2764	-0.211674	0.456524	88.7418	-0.804192	0.0362249	70.2951	-0.425972	0.24646	77.2299	-1.34212	0.000333319	64.2488	-0.68143	0.0966307
BRWD1_NM_001007246	BRWD1	NM_001007246	ENSG00000185658	107.72	-0.539255	0.0900489	41.0933	-0.587422	NA	78.3985	-1.2007	0.00266722	35.5808	-0.60317	NA	75.7187	-1.35196	0.000333319	32.9871	-0.859202	0.08997
RCBTB2_NM_001268	RCBTB2	NM_001268	ENSG00000136161	67.0206	-0.337091	NA	85.2401	-0.551476	0.114996	49.8286	-0.8127	0.0788736	69.8719	-0.70174	0.0695744	40.8705	-1.72203	0.000344543	60.2847	-1.26469	0.00166032
EIF2B4_NM_001034116	EIF2B4	NM_001034116	ENSG00000115211	81.137	-0.599494	0.0801715	37.0517	-0.32375	NA	62.9828	-1.00257	0.0216039	34.1834	-0.141303	NA	56.5961	-1.48154	0.000344942	35.3136	-0.0507029	0.92666
RPL10_NM_001303624	RPL10	NM_001303624	ENSG00000147403	47.9857	-0.821236	NA	50.7882	-0.52899	NA	38.4994	-1.20316	0.0139278	37.732	-1.01861	NA	34.2313	-1.78953	0.000344942	34.321	-1.40697	0.00570444
C1orf106_NM_018265	C1orf106	NM_018265	ENSG00000163362	81.8535	-0.623278	0.0756004	86.5109	-0.418624	0.194456	60.9321	-1.2259	0.00441762	65.5916	-0.796826	0.0406261	57.0667	-1.50759	0.000346487	57.6245	-1.31811	0.00122125
SLC39A10_NM_020342	SLC39A10	NM_020342	ENSG00000196950	71.1264	-0.809652	0.050047	95.5686	-0.529873	0.118759	52.7849	-1.56769	0.000522004	70.7672	-1.04071	0.0112006	53.0799	-1.53335	0.000350682	65.3897	-1.37343	0.000423066
LOC100506639_NR_102752	LOC100506639	NR_102752	ENSG00000172262	143.976	-0.421958	0.128185	91.7562	-0.327633	0.287696	118.136	-0.609021	0.10227	72.7042	-0.554598	0.139525	99.8511	-1.23131	0.000350682	61.1122	-1.17513	0.00445936
GAPDH_NM_001289745	GAPDH	NM_001289745	ENSG00000111640	109.784	-0.516446	0.102618	65.4073	-0.527135	NA	80.8348	-1.108	0.00619364	56.9285	-0.469665	0.260421	75.4143	-1.38862	0.000350762	54.1848	-0.622855	0.159786
WT1-AS_NR_120546	WT1-AS	NR_120546	N/A	77.4114	-0.561862	0.10073	60.1898	-0.597315	NA	56.6217	-1.21481	0.00533506	48.7481	-0.804935	0.0576834	51.9325	-1.58167	0.000352997	46.5074	-0.963976	0.0339748
NAT6_NM_001200016	NAT6	NM_001200016	ENSG00000243477	50.7039	-0.892776	NA	37.0514	-0.37292	NA	39.4286	-1.3947	0.00639165	29.896	-0.535975	NA	37.0358	-1.82168	0.000352997	28.4504	-0.708008	0.185498
RMI1_NM_024945	RMI1	NM_024945	ENSG00000178966	112.334	-0.460725	0.116911	76.8759	-0.250385	0.403462	80.3719	-1.17416	0.00317247	60.054	-0.512591	0.184804	77.4837	-1.31541	0.000358146	56.3443	-0.706744	0.0922463
FTH1_NM_002032	FTH1	NM_002032	ENSG00000167996	118.523	-0.426343	0.142684	54.6369	-0.173081	NA	85.5265	-1.07931	0.00548173	42.6795	-0.396301	0.345702	81.0193	-1.30639	0.000359621	45.9962	-0.168416	0.717861
UBQLN4_NM_001304342	UBQLN4	NM_001304342	ENSG00000160803	66.4927	-0.640539	NA	24.211	-0.13733	NA	53.1056	-0.978553	0.0287684	20.5539	-0.145449	NA	46.0289	-1.60013	0.000361774	20.9097	-0.0796356	NA
CLCN7_NM_001114331	CLCN7	NM_001114331	ENSG00000103249	85.2831	-0.591303	0.0844979	51.5318	-0.338681	NA	67.0392	-0.965299	0.0221413	41.6165	-0.525339	0.221748	58.616	-1.52479	0.000362211	35.9521	-1.00837	0.0418451
ZNF628_NM_033113	ZNF628	NM_033113	ENSG00000197483	104.573	-0.667226	0.0581549	40.9265	-0.0634652	NA	81.1253	-1.10474	0.00501559	37.9007	0.13739	NA	76.9628	-1.31662	0.000362854	33.2403	-0.158885	0.764469
MIR4519_NR_039744	MIR4519	NR_039744	ENSG00000265991	88.8042	-0.557946	0.104954	57.6032	-0.464142	NA	72.6867	-0.779035	0.060146	47.0514	-0.625565	0.137834	61.1064	-1.48012	0.000369114	43.4544	-0.882904	0.0610268
LRMP_NM_001204126	LRMP	NM_001204126	ENSG00000118308	100.722	-0.590764	0.0753713	83.4007	-0.127961	0.643266	80.0074	-0.925125	0.0266403	71.0851	-0.123398	0.74991	71.7557	-1.36794	0.000371667	58.5806	-0.680511	0.112837
GFI1_NM_001127216	GFI1	NM_001127216	ENSG00000162676	155.105	-0.295156	0.235294	217.04	-0.325803	0.197151	116.991	-0.751854	0.0429052	161.019	-0.765503	0.0133213	102.743	-1.23244	0.000375911	147.856	-1.08364	0.000156671
FKBP2_NM_001135208	FKBP2	NM_001135208	ENSG00000173486	76.3011	-0.725208	0.0583325	27.69	-0.266743	NA	65.9148	-0.779622	0.0639803	21.0349	-0.573384	NA	54.8132	-1.51624	0.000375911	23.6398	-0.298242	NA
RXRA_NM_002957	RXRA	NM_002957	ENSG00000186350	89.7488	-0.431203	0.147526	46.383	-0.307688	NA	62.875	-1.21698	0.00421935	40.4399	-0.268606	0.531368	59.2924	-1.46387	0.000376888	39.5617	-0.318229	0.519317
RNASEH2B-AS1_NR_046552	RNASEH2B-AS1	NR_046552	ENSG00000233672	202.148	-0.45667	0.110503	184.182	-0.304996	0.249705	155.838	-0.675054	0.248778	139.308	-0.681809	0.0519496	124.392	-1.81649	0.000377292	123.464	-1.14809	0.000382019
RPL37A_NM_000998	RPL37A	NM_000998	ENSG00000197756	70.7182	-0.459165	0.145057	82.9443	-0.538538	0.130235	52.0173	-1.05281	0.018534	64.3607	-0.896776	0.0273066	45.8959	-1.60259	0.000377292	63.7304	-0.921897	0.0223849
LOC102724467_NR_120309	LOC102724467	NR_120309	N/A	57.9802	-0.712787	NA	115.63	-0.91011	0.0201963	42.9164	-1.39038	0.00345395	81.7466	-1.83245	5.65928e-07	40.4632	-1.67848	0.000378767	83.211	-1.72359	1.0432e-06
KLHL21_NM_014851	KLHL21	NM_014851	ENSG00000162413	96.967	-0.356248	0.204812	34.4194	-0.4801	NA	74.0626	-0.770573	0.0581223	32.7594	-0.233298	NA	62.8183	-1.43312	0.000381209	31.8247	-0.286542	0.589616
SCARNA16_NR_003013	SCARNA16	NR_003013	ENSG00000275143	73.8324	-0.813055	0.0398384	41.1343	-0.0769903	NA	60.2459	-1.08077	0.0158257	29.5245	-0.491828	NA	55.3246	-1.49019	0.000381367	28.9911	-0.570617	0.287628
MYL6B_NM_001199629	MYL6B	NM_001199629	ENSG00000196465	89.6137	-0.488493	0.116911	40.2913	-0.0830899	NA	68.6622	-0.92543	0.0250676	31.5498	-0.252242	NA	60.6207	-1.47003	0.000381822	27.725	-0.644561	0.233607
IFI16_NM_001206567	IFI16	NM_001206567	ENSG00000163565	69.1623	-0.645882	0.0753713	25.9392	-0.0284922	NA	52.7025	-1.16743	0.0092466	20.9147	-0.133202	NA	48.4156	-1.56406	0.000383685	18.6781	-0.412566	NA
DDIT3_NM_001195053	DDIT3	NM_001195053	ENSG00000175197	75.625	-0.587945	0.0958197	46.0335	-0.264207	NA	57.8379	-1.08889	0.0139363	40.3509	-0.192509	0.652544	52.0763	-1.5539	0.000383685	33.5074	-0.744298	0.146166
PRDM8_NM_020226	PRDM8	NM_020226	ENSG00000152784	85.1497	-0.464854	0.139289	47.9914	-0.479223	NA	60.4876	-1.18937	0.00667271	39.8637	-0.580331	0.184804	56.604	-1.49822	0.000383685	36.9795	-0.829622	0.089575
ELANE_NM_001972	ELANE	NM_001972	ENSG00000197561	118.151	-0.358432	0.186595	110.346	-0.606374	0.0842261	88.4611	-0.843469	0.0272913	80.4916	-1.20907	0.001395	77.7327	-1.34037	0.000386651	74.6889	-1.53633	6.12474e-05
ZFP36L2_NM_006887	ZFP36L2	NM_006887	ENSG00000152518	120.93	-0.483146	0.105175	121.472	-0.351466	0.22139	89.1499	-1.07516	0.00482482	92.2	-0.725206	0.0394481	84.6003	-1.26999	0.00040224	93.3122	-0.666791	0.0568419
HYAL3_NM_001200030	HYAL3	NM_001200030	ENSG00000186792	51.0077	-0.871178	NA	35.349	-0.373347	NA	39.4286	-1.3947	0.00639165	28.2786	-0.566425	NA	37.2927	-1.78284	0.000403969	27.7525	-0.645515	0.231147
MIR3202-1_NR_036174	MIR3202-1	NR_036174	ENSG00000265176	50.3193	-0.659621	NA	86.1245	-0.456642	0.172135	35.6123	-1.5156	0.0027681	59.2214	-1.24198	0.00352343	34.1088	-1.77813	0.000405687	51.4411	-1.50736	0.0240005
ZNF775_NM_173680	ZNF775	NM_173680	ENSG00000196456	73.726	-0.465322	0.140877	51.8418	-0.593822	NA	53.8239	-1.08717	0.0141117	45.5659	-0.548468	0.189869	48.5688	-1.56076	0.000411411	39.8536	-1.01854	0.0317141
IL31RA_NM_001242636	IL31RA	NM_001242636	ENSG00000164509	64.8755	-0.957013	NA	71.0531	-0.930064	NA	48.5827	-1.76224	0.000345951	55.6083	-1.3426	0.00178689	49.4101	-1.68034	0.000418449	53.0031	-1.58249	0.000305118
TGFBRAP1_NM_001142621	TGFBRAP1	NM_001142621	ENSG00000135966	70.8946	-0.656077	0.0753713	42.1947	-0.215194	NA	56.1599	-1.05881	0.0164182	33.3557	-0.437578	NA	50.3033	-1.53743	0.0004193	31.8375	-0.559671	0.282617
FURIN_NM_001289823	FURIN	NM_001289823	ENSG00000140564	111.831	-0.56544	0.0753713	71.3968	-0.275612	NA	87.0286	-0.969977	0.0137583	52.9418	-0.691549	0.0951434	80.3764	-1.27693	0.000420411	47.2921	-1.07834	0.0172275
MRPL3_NM_007208	MRPL3	NM_007208	ENSG00000114686	63.2931	-0.226299	NA	74.5182	-0.433721	NA	47.8557	-0.635089	0.165037	51.1229	-1.20797	0.00520852	36.5485	-1.7325	0.000421568	47.8469	-1.54749	0.000423066
C14orf159_NM_001102367	C14orf159	NM_001102367	ENSG00000133943	80.5233	-0.652912	0.068269	81.247	-0.430636	0.194456	57.6486	-1.49348	0.000644867	59.9869	-0.90836	0.0256614	57.7858	-1.45256	0.000422798	52.1457	-1.52957	0.000300408
ZNF710_NM_198526	ZNF710	NM_198526	ENSG00000140548	84.7393	-0.356267	0.215413	48.3766	-0.303766	NA	61.3548	-0.975611	0.0224443	33.2265	-0.974604	NA	53.8809	-1.51753	0.000422798	32.62	-1.08219	0.0334196
BIN2_NM_001290007	BIN2	NM_001290007	ENSG00000110934	87.4529	-0.37645	0.199366	122.956	-0.5539	0.103304	63.3347	-0.978932	0.0215685	89.5499	-1.13284	0.00200414	56.1561	-1.48555	0.000425923	84.0756	-1.42726	5.77295e-05
AVEN_NM_020371	AVEN	NM_020371	ENSG00000169857	84.4045	-0.607032	0.0767793	71.005	-0.401397	NA	61.1301	-1.34688	0.00211745	50.344	-1.04308	0.0153151	59.7505	-1.45306	0.000433154	51.0266	-1.01413	0.0226611
BCOR_NM_001123383	BCOR	NM_001123383	ENSG00000183337	53.7873	-0.666388	NA	80.9569	-0.405295	0.218624	42.5115	-1.04918	0.02752	53.3679	-1.33758	0.00169403	36.7433	-1.72774	0.000433154	50.7212	-1.60689	0.000172118
SDE2_NM_152608	SDE2	NM_152608	ENSG00000143751	73.7178	-0.556264	0.105175	37.8913	0.0177702	NA	54.003	-1.20567	0.00728866	32.6829	0.0712963	NA	49.6786	-1.57779	0.00043764	29.1618	-0.161646	0.768718
GAB2_NM_012296	GAB2	NM_012296	ENSG00000033327	62.4617	-0.555999	NA	55.8317	-0.520877	NA	51.6681	-1.01278	0.0357852	41.4915	-1.42643	0.0027091	44.726	-1.68523	0.000442328	37.9216	-1.99565	7.91476e-05
C19orf12_NM_001031726	C19orf12	NM_001031726	ENSG00000131943	111.276	-0.376103	0.175949	51.0487	-0.0547233	NA	81.5931	-0.961808	0.0204942	34.4048	-0.695532	NA	74.8296	-1.3171	0.000442328	35.9828	-0.535314	0.282401
RPL13AP5_NR_026712	RPL13AP5	NR_026712	ENSG00000236552	116.965	-0.391326	0.156911	141.25	-0.247355	0.360004	85.2189	-0.99707	0.0109234	108.593	-0.535225	0.11061	79.0942	-1.29798	0.000442328	102.794	-0.694412	0.0449595
PRICKLE2-AS3_NR_046702	PRICKLE2-AS3	NR_046702	ENSG00000226017	62.7181	-0.887136	NA	38.2814	-0.623668	NA	45.9121	-1.7212	0.000331956	28.5779	-1.14504	NA	47.3805	-1.56479	0.000444391	29.2943	-1.10086	0.0372104
NFATC1_NM_001278672	NFATC1	NM_001278672	ENSG00000131196	71.521	-0.359063	0.22936	26.1676	0.143818	NA	52.7849	-0.883306	0.0476144	20.3219	0.0115694	NA	44.6047	-1.60427	0.000444961	19.8956	0.00956711	NA
INPP5F_NM_001243195	INPP5F	NM_001243195	ENSG00000198825	78.9951	-0.58529	0.0930897	30.6852	-0.112573	NA	61.5588	-0.994668	0.0241953	24.0781	-0.308005	NA	54.7621	-1.49077	0.000446654	30.2439	0.258578	0.628398
UNC45A_NM_001039675	UNC45A	NM_001039675	ENSG00000140553	76.9936	-0.468439	0.148371	99.9845	-0.509264	0.138458	62.408	-0.717399	0.111168	70.0908	-1.23762	0.00188669	50.446	-1.59854	0.000446654	65.8675	-1.531	0.000130413
IGF2BP2_NM_001007225	IGF2BP2	NM_001007225	ENSG00000073792	125.743	-0.345087	0.192376	173.889	-0.21321	0.385659	91.1819	-0.946187	0.0131571	121.485	-0.840694	0.0122286	84.0977	-1.25575	0.000455878	114.09	-1.07539	0.000765835
G3BP2_NM_203504	G3BP2	NM_203504	ENSG00000138757	51.102	-0.540485	NA	50.7929	-0.444562	NA	39.0502	-1.01142	0.0388698	43.6402	-0.454529	0.292931	33.0638	-1.7942	0.000455878	36.6603	-1.00908	0.039544
INPPL1_NM_001567	INPPL1	NM_001567	ENSG00000165458	90.6261	-0.553559	0.0931564	63.897	-0.279432	NA	69.9502	-0.988678	0.0159779	44.3956	-0.911328	0.0379391	63.4333	-1.38612	0.000461391	44.5253	-0.913613	0.0454331
ADAMTS4_NM_005099	ADAMTS4	NM_005099	ENSG00000158859	88.7235	-0.505718	0.183809	82.4139	-0.512695	0.154589	64.9866	-1.35627	0.002747	56.0121	-1.34062	0.00253045	64.8335	-1.41144	0.000464266	50.9807	-1.92404	1.30164e-05
CXorf21_NM_025159	CXorf21	NM_025159	ENSG00000120280	79.9379	-0.226949	0.437022	113.079	-0.507689	0.138458	60.7046	-0.622799	0.185952	89.3328	-0.778474	0.0490463	47.5543	-1.6354	0.000480146	78.8665	-1.28925	0.00128514
PHF19_NM_001009936	PHF19	NM_001009936	ENSG00000119403	94.1095	-0.419359	0.154769	83.0616	-0.36597	0.243959	73.5444	-0.77376	0.0602671	63.524	-0.71425	0.0765758	62.7545	-1.40983	0.000482218	56.2518	-1.1857	0.00613245
IREB2_NM_004136	IREB2	NM_004136	ENSG00000136381	82.0789	-0.561362	0.0992919	41.2106	-0.318042	NA	58.3981	-1.34852	0.00228897	35.2417	-0.346909	NA	57.312	-1.45644	0.000483554	33.7006	-0.456997	0.37085
LRRC8D_NM_001134479	LRRC8D	NM_001134479	ENSG00000171492	120.884	-0.471128	0.112093	106.225	-0.142037	0.583572	94.1124	-0.847289	0.0259273	69.7007	-0.945215	0.0159589	84.6705	-1.25999	0.000485662	68.8907	-1.00012	0.00966506
PAN3-AS1_NR_029383	PAN3-AS1	NR_029383	N/A	117.267	-0.518476	0.0947864	116.113	-0.232889	0.385659	97.9738	-0.658974	0.0854278	82.9117	-0.790525	0.0317815	83.4515	-1.26317	0.000505983	80.2104	-0.888751	0.0159423
TNFSF13_NM_001198622	TNFSF13	NM_001198622	ENSG00000161955	73.8263	-0.694225	0.0612912	100.236	-0.584976	0.0924988	55.9465	-1.25275	0.00421935	76.9167	-0.973307	0.0113971	53.2956	-1.46983	0.000505983	70.2726	-1.36411	0.00032282
MIR320A_NR_029714	MIR320A	NR_029714	ENSG00000208037	88.4158	-0.401592	0.175923	67.7908	-0.180574	NA	64.3399	-1.02199	0.0161788	49.5605	-0.637455	0.122029	57.889	-1.4629	0.000505983	47.7597	-0.748066	0.094709
ARRB1_NM_004041	ARRB1	NM_004041	ENSG00000137486	111.159	-0.496627	0.106641	87.0514	-0.462337	0.161596	91.2923	-0.687551	0.0830464	65.1575	-0.90774	0.0224568	77.7392	-1.31405	0.000516017	61.7496	-1.12781	0.00510314
MIR223_NR_029637	MIR223	NR_029637	ENSG00000284567	60.7656	-0.498917	NA	36.1858	-0.202541	NA	42.2034	-1.3471	0.00577674	29.231	-0.369287	NA	39.1318	-1.71975	0.000516017	23.0107	-1.08449	NA
LOC100422212_NR_104294	LOC100422212	NR_104294	N/A	54.9044	-0.840875	NA	43.3508	-0.665156	NA	44.2509	-1.2008	0.0118847	32.7038	-1.19114	NA	40.2183	-1.65906	0.000531709	31.7935	-1.37383	0.0103293
MUS81_NM_025128	MUS81	NM_025128	ENSG00000172732	71.8286	-0.556164	0.105175	69.172	-0.526006	NA	51.4302	-1.2922	0.00422619	49.8491	-1.13209	0.00905722	48.2233	-1.5746	0.000531709	51.462	-0.995718	0.0223849
C18orf65_NM_001272093	C18orf65	NM_001272093	ENSG00000275763	77.0843	-0.52965	0.116437	136.006	-0.568206	0.0924988	57.9668	-1.06363	0.017638	101.759	-1.04716	0.00293434	52.2408	-1.51528	0.000531709	88.5241	-1.70878	1.0432e-06
PRDM15_NM_001040424	PRDM15	NM_001040424	ENSG00000141956	79.76	-0.615551	0.0783577	39.6608	-0.607445	NA	56.247	-1.49712	0.000818565	27.5367	-1.39568	NA	56.3616	-1.45301	0.000531709	29.5955	-1.15865	0.0274102
WIBG_NM_001143853	WIBG	NM_001143853	ENSG00000170473	82.1117	-0.37098	0.203185	52.9125	-0.323878	NA	61.6724	-0.842468	0.0472905	44.1811	-0.386674	0.349597	53.1523	-1.46478	0.000532393	36.2593	-1.00546	0.0431168
TMEM53_NM_001300746	TMEM53	NM_001300746	ENSG00000126106	78.5817	-0.460119	0.145424	69.6519	-0.686526	NA	59.1944	-0.949801	0.0272266	55.2213	-0.981768	0.018322	52.0359	-1.49021	0.000532461	50.6278	-1.3435	0.00175095
ACOX1_NM_001185039	ACOX1	NM_001185039	ENSG00000161533	84.827	-0.355807	0.218709	47.8989	0.126437	NA	65.2828	-0.743048	0.0755928	36.3824	-0.085021	NA	54.7106	-1.44797	0.000535011	32.2783	-0.394795	0.448173
MIR4442_NR_039644	MIR4442	NR_039644	ENSG00000283971	79.4586	-0.299192	0.303365	95.8556	-0.215206	0.433311	59.0634	-0.809399	0.0765733	68.9366	-0.726134	0.0574125	49.5015	-1.56896	0.000535011	65.9472	-0.873756	0.0262894
TRAP1_NM_001272049	TRAP1	NM_001272049	ENSG00000126602	72.6124	-0.241298	0.401283	36.9347	-0.214109	NA	47.4346	-1.21769	0.00913885	26.3696	-0.694585	NA	42.975	-1.64693	0.000536142	31.9325	-0.180848	0.731753
ZNF512_NM_001271286	ZNF512	NM_001271286	ENSG00000243943	92.1388	-0.598877	0.0781946	58.3227	-0.374365	NA	69.3416	-1.15011	0.00553838	45.6249	-0.649218	0.131264	65.7789	-1.37895	0.000548585	45.4015	-0.672229	0.155531
ARHGEF3_NM_001128616	ARHGEF3	NM_001128616	ENSG00000163947	68.9827	-0.575696	0.100771	71.269	-0.557209	NA	53.7544	-0.973239	0.0287257	54.0356	-0.982362	0.0226712	47.4021	-1.53462	0.000548585	46.7495	-1.69494	0.000187421
MIR6516_NR_106997	MIR6516	NR_106997	ENSG00000284250	74.1799	-0.784775	0.0502839	34.1329	0.222095	NA	59.8986	-1.09506	0.0139278	23.3571	-0.184299	NA	55.5301	-1.45417	0.000549863	23.617	-0.167129	NA
DDX17_NM_001098504	DDX17	NM_001098504	ENSG00000100201	87.7247	-0.453268	0.137704	115.429	-0.290796	0.301986	72.0595	-0.642725	0.111799	89.8279	-0.56271	0.108171	59.1983	-1.41566	0.000558594	75.4091	-1.18373	0.00170518
CHID1_NM_001142674	CHID1	NM_001142674	ENSG00000177830	67.3407	-0.843852	NA	34.0271	-0.216405	NA	52.8286	-1.3136	0.00340429	26.2582	-0.492692	NA	49.8944	-1.5468	0.000580946	27.4425	-0.356707	0.511327
GABPB1_NM_002041	GABPB1	NM_002041	ENSG00000104064	128.602	-0.311136	0.235756	154.071	-0.263042	0.307039	93.7738	-0.886696	0.0266403	117.775	-0.589628	0.0699714	84.939	-1.26614	0.000580969	103.755	-1.03859	0.00148827
IFITM1_NM_003641	IFITM1	NM_003641	ENSG00000185885	65.2992	-0.742591	NA	42.4682	-0.340746	NA	49.4871	-1.31885	0.00459997	32.5651	-0.673004	NA	46.7374	-1.58716	0.000590199	33.5016	-0.579276	0.25384
SLC25A19_NM_001126121	SLC25A19	NM_001126121	ENSG00000125454	61.0656	-0.219661	NA	46.6883	-0.185836	NA	47.2458	-0.552403	0.238137	36.066	-0.429429	NA	35.3396	-1.71607	0.000596362	35.3967	-0.457346	0.374356
SET_NM_001248000	SET	NM_001248000	ENSG00000119335	84.4426	-0.390578	0.18544	57.501	-0.364661	NA	62.4955	-0.928318	0.0298428	41.7204	-0.881166	0.048486	55.5493	-1.44376	0.000597551	41.5537	-0.874452	0.0649162
UBE2S_NM_014501	UBE2S	NM_014501	ENSG00000108106	122.918	-0.487538	0.105175	44.0496	-0.485203	NA	95.2783	-0.882937	0.0215179	45.0051	-0.03453	0.937531	87.2941	-1.21986	0.000600376	39.6062	-0.36677	0.444303
HSPA4_NM_002154	HSPA4	NM_002154	ENSG00000170606	75.5468	-0.379147	0.203485	58.1182	-0.429283	NA	57.6648	-0.809971	0.0632544	46.0922	-0.688816	0.102418	48.4592	-1.5182	0.000600376	41.6034	-1.03397	0.0274102
CRYL1_NM_015974	CRYL1	NM_015974	ENSG00000165475	50.1062	-0.707522	NA	39.1064	-0.32193	NA	45.5831	-0.632657	0.174501	28.8403	-0.759599	NA	35.0825	-1.7025	0.000604385	32.4642	-0.39405	0.443353
ZSCAN9_NM_001199479	ZSCAN9	NM_001199479	ENSG00000137185	75.1111	-0.501257	0.132211	59.7111	-0.540383	NA	56.301	-1.03325	0.0333478	48.7133	-0.725388	0.0846999	50.3222	-1.56167	0.000613809	45.06	-1.03095	0.0239912
FRY-AS1_NR_103839	FRY-AS1	NR_103839	ENSG00000237637	105.649	-0.13087	0.624784	162.405	-0.404904	0.173137	83.3728	-0.396469	0.346709	131.238	-0.575453	0.103328	62.9702	-1.44722	0.000615261	103.08	-1.5732	6.95459e-06
LOC283575_NR_110554	LOC283575	NR_110554	ENSG00000246548	69.2477	-0.662857	0.071826	85.4355	-0.225637	0.436037	53.3663	-1.1405	0.0116672	58.9563	-0.878005	0.0347102	49.2988	-1.49113	0.000615261	54.6423	-1.18419	0.00492253
PCBP1_NM_006196	PCBP1	NM_006196	ENSG00000169564	150.338	-0.339868	0.183554	119.891	-0.411977	0.179989	117.829	-0.6638	0.0632979	89.5857	-0.849322	0.0191889	103.029	-1.15788	0.000619712	78.999	-1.3448	0.000265901
RBM38_NM_001291780	RBM38	NM_001291780	ENSG00000132819	73.3291	-1.06519	0.00918904	30.3366	-0.247145	NA	60.6261	-1.35688	0.00170797	24.5737	-0.385961	NA	59.9996	-1.39214	0.000621363	25.2782	-0.290651	NA
NSMAF_NM_001144772	NSMAF	NM_001144772	ENSG00000035681	246.226	-0.244331	0.257291	241.47	-0.213928	0.368511	185.711	-0.68473	0.0380533	179.237	-0.631737	0.0525999	168.349	-1.02908	0.000632843	154.081	-1.20844	5.60673e-05
EBAG9_NM_001278938	EBAG9	NM_001278938	ENSG00000147654	73.4155	-0.668543	0.0656974	32.9225	-0.217947	NA	57.1714	-1.10374	0.0133243	26.5249	-0.389168	NA	52.6709	-1.45599	0.000632843	25.4585	-0.498855	NA
HLX-AS1_NR_046901	HLX-AS1	NR_046901	ENSG00000257551	149.163	-0.34506	0.178507	93.1459	-0.202926	0.456524	114.133	-0.755315	0.0385328	70.3243	-0.550357	0.13677	101.826	-1.18611	0.000638795	63.8294	-0.878209	0.0275065
MAP2K5_NM_002757	MAP2K5	NM_002757	ENSG00000137764	90.0579	-0.392979	0.189089	58.7636	-0.439367	NA	61.8398	-1.24954	0.0045052	41.7109	-1.0662	0.0188232	59.4766	-1.43373	0.000650649	42.7528	-0.979847	0.0345145
ZNF830_NM_052857	ZNF830	NM_052857	ENSG00000198783	69.7521	-0.45913	0.155792	53.8211	-0.178528	NA	51.0557	-1.1054	0.0150245	36.707	-0.815254	NA	46.4491	-1.53614	0.000650726	36.3935	-0.868909	0.0759682
HIST1H4H_NM_003543	HIST1H4H	NM_003543	ENSG00000158406	114.588	-0.488228	0.121992	123.524	-0.861217	0.0389056	88.7452	-0.729643	0.210518	107.275	-0.824475	0.0230295	79.2986	-1.36601	0.000650726	106.392	-0.836073	0.0147998
ETV3_NM_005240	ETV3	NM_005240	ENSG00000117036	59.8522	-0.56981	NA	32.7652	0.213845	NA	46.074	-1.02884	0.0268333	25.5834	0.118205	NA	40.5459	-1.60371	0.000655557	19.7148	-0.488941	NA
LOC100507600_NR_045486	LOC100507600	NR_045486	ENSG00000226806	62.0659	-0.480979	NA	66.8351	-0.689418	NA	47.6746	-0.88883	0.0578733	53.7182	-0.918676	0.0295809	40.6065	-1.60834	0.00066301	49.6966	-1.23785	0.00457922
MIR4487_NR_039707	MIR4487	NR_039707	ENSG00000264583	64.7142	-0.688696	NA	51.081	-0.113654	NA	49.5463	-1.18802	0.0109234	33.5534	-0.809908	NA	46.1409	-1.5526	0.000664006	36.8153	-0.549801	0.279724
MIS18BP1_NM_018353	MIS18BP1	NM_018353	ENSG00000129534	109.909	-0.527627	0.0941067	58.1126	-0.379465	NA	85.5476	-0.93345	0.0185992	53.3288	-0.20987	0.590458	78.4471	-1.28111	0.000664006	44.5117	-0.749301	0.101933
MAP3K7CL_NM_001286617	MAP3K7CL	NM_001286617	ENSG00000156265	65.8353	-0.767372	NA	68.2125	-0.46069	NA	53.7827	-1.06171	0.0183033	54.1256	-0.709795	0.0828083	48.49	-1.50941	0.000664006	47.1175	-1.25374	0.00579672
MBNL1_NM_021038	MBNL1	NM_021038	ENSG00000152601	196.909	-0.28394	0.214491	204.908	-0.223352	0.348719	152.702	-0.631498	0.0727058	140.829	-0.921499	0.00400546	135.932	-1.04213	0.000664006	142.096	-0.874695	0.00661291
TMBIM4_NM_001282606	TMBIM4	NM_001282606	ENSG00000155957	91.3522	-0.470475	0.13069	137.699	-0.46005	0.136586	63.61	-1.31103	0.00302462	105.447	-0.82213	0.0201283	61.3951	-1.43789	0.000664862	95.738	-1.2029	0.000419378
MIR345_NR_029906	MIR345	NR_029906	ENSG00000198984	78.61	-0.506923	0.121812	43.447	-0.366134	NA	56.6976	-1.19904	0.0087212	32.676	-0.736781	NA	53.3972	-1.46915	0.000664862	35.8342	-0.452338	0.369226
HDAC2_NM_001527	HDAC2	NM_001527	ENSG00000196591	59.5904	-0.532548	NA	70.3902	-0.514214	NA	48.7988	-0.764179	0.0929833	56.4701	-0.735486	0.0700764	39.6753	-1.62844	0.000672614	50.9561	-1.11319	0.00971458
NFATC3_NM_004555	NFATC3	NM_004555	ENSG00000072736	72.09	-0.581779	0.100076	91.2732	-0.452615	0.16314	54.3842	-1.1262	0.0121866	68.5103	-0.89682	0.0230295	48.6738	-1.59655	0.000674361	61.8479	-1.32943	0.00102128
PPP1CA_NM_001008709	PPP1CA	NM_001008709	ENSG00000172531	77.2767	-0.556945	0.103508	45.191	-0.244314	NA	58.5432	-1.07283	0.0144776	36.2411	-0.410869	NA	53.6442	-1.45769	0.000679287	32.1259	-0.777964	0.128198
GAB2_NM_080491	GAB2	NM_080491	ENSG00000033327	112.395	-0.351311	0.211443	85.0454	-0.322897	0.314136	79.2472	-1.07391	0.0149228	57.5677	-1.10311	0.0154345	74.5234	-1.33701	0.000679287	55.8675	-1.26684	0.00528031
NSMCE1_NM_145080	NSMCE1	NM_145080	ENSG00000169189	71.2636	-0.416005	0.185969	54.8023	-0.288356	NA	51.4145	-1.08232	0.0170238	44.4734	-0.4364	0.303834	46.4813	-1.53098	0.000679287	38.2472	-0.918436	0.062813
RPS5_NM_001009	RPS5	NM_001009	ENSG00000083845	116.505	-0.629075	0.0612912	66.1064	-0.35912	NA	87.2982	-1.2314	0.00145959	56.1935	-0.379775	0.326202	87.0913	-1.20678	0.000679287	55.1175	-0.420968	0.324379
CD180_NM_005582	CD180	NM_005582	ENSG00000134061	87.5075	-0.535628	0.106641	146.159	-0.342212	0.235665	68.8493	-0.893375	0.0444692	109.024	-0.646675	0.194719	60.4578	-1.45184	0.000682157	90.14	-1.62243	1.65347e-05
RXFP1_NM_001253727	RXFP1	NM_001253727	ENSG00000171509	45.2522	-0.468381	NA	35.317	-0.041131	NA	34.375	-0.946781	0.0677068	30.2401	-0.0308787	NA	28.2979	-1.86663	0.000683895	22.4682	-0.818177	NA
SETD4_NM_001007259	SETD4	NM_001007259	ENSG00000185917	57.2512	-0.346293	NA	53.603	-0.289329	NA	39.8718	-1.09063	0.0238571	39.637	-0.708473	0.106835	35.2052	-1.68431	0.000690704	39.5327	-0.72535	0.127523
LMNA_NM_001257374	LMNA	NM_001257374	ENSG00000160789	70.5132	-0.636972	0.0758558	97.3327	-0.369254	0.239144	57.4451	-0.891999	0.0401345	63.1883	-1.33593	0.00106498	49.7096	-1.48925	0.000701327	66.2598	-1.15092	0.00312835
SFSWAP_NM_001261411	SFSWAP	NM_001261411	ENSG00000061936	78.3427	-0.487127	0.126372	46.8068	-0.321153	NA	58.3412	-1.04061	0.0166006	40.807	-0.289746	0.49144	53.031	-1.4456	0.000701327	35.53	-0.685113	0.165507
ERLIN1_NM_001100626	ERLIN1	NM_001100626	ENSG00000107566	95.4058	-0.609951	0.0749613	83.4128	-0.31687	0.307153	75.0309	-1.00961	0.0137657	70.501	-0.35455	0.345099	69.2265	-1.31985	0.000705736	56.9909	-1.04883	0.0139634
LRRC27_NM_001309474	LRRC27	NM_001309474	ENSG00000148814	83.0628	-0.622654	0.0748342	55.2789	-0.599083	NA	62.1153	-1.21002	0.0046109	45.9739	-0.747196	0.0956607	58.156	-1.45709	0.000705736	38.7403	-1.44747	0.0040997
WT1-AS_NR_023920	WT1-AS	NR_023920	N/A	63.9214	-0.644281	NA	72.6084	-0.47338	NA	48.2951	-1.20136	0.00923535	54.3438	-0.917884	0.0279589	43.303	-1.66403	0.000705736	52.8975	-1.01786	0.0166223
ZNF48_NM_001214906	ZNF48	NM_001214906	ENSG00000180035	63.0964	-0.534693	NA	24.084	-0.265537	NA	47.8009	-1.02639	0.0272913	21.0683	-0.253637	NA	41.9819	-1.60166	0.000705736	20.4798	-0.28933	NA
SEC14L1_NM_001204410	SEC14L1	NM_001204410	ENSG00000129657	71.1215	-0.771418	0.0578616	49.5212	-0.394202	NA	57.8132	-1.03453	0.0244773	37.0762	-0.811811	NA	53.0605	-1.44829	0.000705736	36.2137	-0.920549	0.0636388
PRKD2_NM_001079880	PRKD2	NM_001079880	ENSG00000105287	92.6943	-0.704573	0.0581549	49.6794	-0.056291	NA	66.9877	-1.48759	0.000335368	38.1959	-0.286503	NA	67.1761	-1.40815	0.000709912	37.5219	-0.303662	0.552765
USE1_NM_018467	USE1	NM_018467	ENSG00000053501	101.032	-0.435469	0.138382	88.961	-0.516223	0.130235	76.5189	-0.903346	0.0242084	73.413	-0.633609	0.0880298	69.287	-1.30093	0.000710946	63.5003	-1.15373	0.00426511
SNUPN_NM_001042581	SNUPN	NM_001042581	ENSG00000169371	78.2259	-0.547822	0.106029	65.2763	-0.621635	NA	64.1534	-0.769555	0.0723296	53.2483	-0.843996	0.0443967	52.4365	-1.5605	0.000711448	49.4776	-1.11197	0.0108495
GNA13_NM_006572	GNA13	NM_006572	ENSG00000120063	94.6182	-0.458739	0.136615	42.2175	-0.221841	NA	70.7492	-0.992675	0.0179254	32.3934	-0.510451	NA	64.6536	-1.36941	0.000711448	36.5514	-0.170623	0.736852
MYL12A_NM_001303047	MYL12A	NM_001303047	ENSG00000101608	78.3518	-0.536401	0.107485	68.3647	-0.120543	NA	65.8425	-0.652338	0.117276	54.0093	-0.303263	0.434907	53.9535	-1.43388	0.000711448	48.4865	-0.600038	0.180094
VPS4B_NM_004869	VPS4B	NM_004869	ENSG00000119541	57.8483	-0.583362	NA	37.5378	-0.0344468	NA	45.5708	-0.955769	0.0414195	30.8296	-0.114694	NA	39.0708	-1.61742	0.000711448	29.4834	-0.196289	0.716602
UNC5C_NM_003728	UNC5C	NM_003728	ENSG00000182168	153.132	-0.0389559	0.870213	187.674	-0.254865	0.313858	115	-0.435214	0.221727	142.463	-0.598531	0.0890368	93.1184	-1.18747	0.000712435	126.96	-1.01576	0.00134584
DENND1C_NM_001290331	DENND1C	NM_001290331	ENSG00000205744	83.9771	-0.675946	0.0612912	92.2976	-0.303373	0.307039	69.9872	-0.840506	0.0401345	69.9457	-0.666653	0.0779696	61.4257	-1.36067	0.000712532	60.606	-1.1943	0.00325153
FLJ10038_NR_026891	FLJ10038	NR_026891	ENSG00000104064	156.328	-0.322849	0.192376	166.007	-0.156988	0.501058	119.601	-0.733555	0.0387193	124.617	-0.521417	0.10921	107.338	-1.11574	0.000714334	103.091	-1.21806	0.000194876
LOC102031319_NR_104163	LOC102031319	NR_104163	ENSG00000229327	110.365	-0.494987	0.107485	40.4619	-0.104781	NA	90.0768	-0.704188	0.0637528	36.3746	0.0227696	NA	78.1431	-1.23915	0.000722074	28.6225	-0.589424	0.268087
DEPDC5_NM_001242897	DEPDC5	NM_001242897	ENSG00000100150	89.8113	-0.571994	0.0850066	37.9437	-0.103952	NA	64.3346	-1.33187	0.00175099	31.5816	-0.155963	NA	63.8037	-1.33929	0.000722074	28.6209	-0.382257	0.478067
TCIRG1_NM_006019	TCIRG1	NM_006019	ENSG00000110719	88.7999	-0.425312	0.156931	69.4861	-0.419456	NA	61.1234	-1.26933	0.00317791	53.6753	-0.732157	0.0768526	59.6605	-1.37786	0.000727357	48.4229	-1.09579	0.015511
MLLT6_NM_005937	MLLT6	NM_005937	ENSG00000275023	76.7105	-0.686313	0.0612912	49.7173	-0.0216669	NA	60.1333	-1.09616	0.0133745	39.5665	-0.176596	0.681412	55.3526	-1.46979	0.000729355	36.7391	-0.352986	0.473932
C19orf12_NM_001256046	C19orf12	NM_001256046	ENSG00000131943	111.25	-0.464641	0.117557	71.3188	-0.188878	NA	80.5517	-1.1384	0.0046835	53.9118	-0.536499	0.198071	78.0811	-1.2515	0.000729654	49.945	-0.785796	0.0765514
TCTEX1D4_NM_001013632	TCTEX1D4	NM_001013632	ENSG00000188396	105.628	-0.415403	0.145057	62.7622	-0.0095061	NA	74.3723	-1.17426	0.00375322	41.0366	-0.710679	0.104135	72.4835	-1.28107	0.000745265	39.2038	-0.852563	0.079967
MIR3613_NR_037407	MIR3613	NR_037407	ENSG00000264864	109.495	-0.525302	0.0931564	154.326	-0.431641	0.140143	85.908	-0.884322	0.0219155	111.165	-1.02339	0.00324108	78.4176	-1.24616	0.000745265	95.315	-1.7838	1.43138e-06
CDT1_NM_030928	CDT1	NM_030928	ENSG00000167513	81.3326	-0.703347	0.0583325	41.5559	-0.247061	NA	65.44	-1.01741	0.0159269	32.5038	-0.466865	NA	59.3866	-1.40778	0.000745265	32.5437	-0.480304	0.349972
CEP63_NM_025180	CEP63	NM_025180	ENSG00000182923	75.9935	-0.470618	0.140786	105.444	-0.668541	0.0726801	60.1989	-0.78881	0.082058	80.5232	-1.12277	0.00321107	50.9998	-1.47947	0.000745265	75.2852	-1.43791	0.000147841
HNRNPL_NM_001533	HNRNPL	NM_001533	ENSG00000104824	52.5198	-0.322622	NA	95.8924	-0.510706	0.130076	36.1874	-1.08579	0.0286787	69.0544	-1.11115	0.00547009	31.5668	-1.74858	0.000753577	70.6073	-1.04902	0.00709604
MIR92B_NR_030281	MIR92B	NR_030281	ENSG00000284586	70.4813	-0.566553	0.105175	28.0848	-0.0824287	NA	49.6848	-1.37497	0.00273164	20.9342	-0.357594	NA	48.5821	-1.48027	0.000754838	27.1815	0.236097	NA
TRAPPC4_NM_016146	TRAPPC4	NM_016146	ENSG00000196655	69.5179	-0.444545	0.156048	30.0918	-0.17943	NA	53.3191	-0.883585	0.0488574	26.7522	-0.111368	NA	45.9875	-1.51383	0.000756351	24.5287	-0.28338	NA
C8orf37_NM_177965	C8orf37	NM_177965	ENSG00000156172	81.2954	-0.738087	0.0581549	57.2812	-0.112323	NA	71.7292	-0.747629	0.0720729	42.4996	-0.482807	0.258588	60.8924	-1.39424	0.000756351	45.6742	-0.277788	0.552855
HIST1H1E_NM_005321	HIST1H1E	NM_005321	ENSG00000168298	113.429	-0.539333	0.157382	111.665	-0.18162	0.494865	93.4739	-0.7556	0.199288	108.167	0.149533	0.661762	84.4737	-1.36764	0.000783752	106.104	0.154437	0.667676
ZNF22_NM_006963	ZNF22	NM_006963	ENSG00000165512	75.187	-0.589478	0.0930897	74.0646	-0.441441	NA	54.671	-1.29514	0.00381387	55.9162	-0.869052	0.037725	51.9247	-1.49611	0.000783943	53.5194	-1.04515	0.0158665
CD300A_NM_001256841	CD300A	NM_001256841	ENSG00000167851	85.0588	-0.448034	0.144251	56.4544	-0.516946	NA	61.3282	-1.08633	0.0149228	45.4167	-0.729788	0.0886861	56.7201	-1.4298	0.000784193	34.4262	-1.99612	6.82262e-05
INO80D_NM_017759	INO80D	NM_017759	ENSG00000114933	148.795	-0.18617	0.449422	170.245	-0.280272	0.273599	114.067	-0.549902	0.15074	131.758	-0.569101	0.0828998	95.2728	-1.19574	0.000787041	112.361	-1.15918	0.000258906
GTSE1_NM_016426	GTSE1	NM_016426	ENSG00000075218	91.2054	-0.460001	0.132648	31.5092	0.0648297	NA	67.3474	-1.02997	0.0133243	27.4687	0.131964	NA	61.6761	-1.41345	0.000787041	21.7256	-0.398924	NA
DCAF11_NM_001163484	DCAF11	NM_001163484	ENSG00000100897	70.8346	-0.469044	0.142684	32.2717	-0.17859	NA	53.6324	-0.949999	0.0326795	24.7658	-0.460891	NA	46.9225	-1.50719	0.000791723	27.5144	-0.163932	0.768221
GFI1_NM_005263	GFI1	NM_005263	ENSG00000162676	167.192	-0.253789	0.30082	159.571	-0.338369	0.218094	119.425	-0.892059	0.0178755	122.521	-0.670485	0.0487157	111.487	-1.1427	0.000796484	105.415	-1.24238	0.000192273
HENMT1_NM_001102592	HENMT1	NM_001102592	ENSG00000162639	115.045	-0.498861	0.105175	54.9843	-0.275273	NA	84.4269	-1.12961	0.00375322	39.4029	-0.814232	0.0791517	82.3662	-1.21406	0.000796484	35.8114	-1.17756	0.0196182
HOTAIR_NR_047517	HOTAIR	NR_047517	ENSG00000228630	56.246	-0.281164	NA	73.7842	-0.498076	NA	39.8959	-0.925164	0.0618074	49.2279	-1.4301	0.00101507	33.4434	-1.72166	0.00080817	48.4653	-1.5113	0.000548936
ENPP2_NM_001040092	ENPP2	NM_001040092	ENSG00000136960	78.641	-0.465453	0.148723	38.7573	0.0558985	NA	61.7172	-0.823822	0.0770384	31.2955	-0.0600539	NA	52.4767	-1.50381	0.00080817	29.4143	-0.176415	0.745041
ERC1_NM_178039	ERC1	NM_178039	ENSG00000082805	91.9779	-0.480026	0.125046	29.1579	-0.108865	NA	72.3835	-0.824903	0.0521159	24.673	-0.15698	NA	62.9432	-1.37365	0.000814311	23.4653	-0.281776	NA
OLA1_NM_001011708	OLA1	NM_001011708	ENSG00000138430	61.287	-0.82631	NA	33.2055	-0.109004	NA	47.509	-1.36437	0.00317791	26.8466	-0.252981	NA	46.3165	-1.49455	0.000824772	28.457	-0.0930851	0.868002
LAMTOR2_NM_001145264	LAMTOR2	NM_001145264	ENSG00000116586	64.5832	-0.661255	NA	57.4168	-0.394978	NA	52.0907	-0.969543	0.0319252	47.7242	-0.472844	0.253914	45.8973	-1.50274	0.000829444	45.8411	-0.582618	0.20378
ZNF48_NM_001214907	ZNF48	NM_001214907	ENSG00000180035	62.6128	-0.51991	NA	24.084	-0.265537	NA	47.3843	-1.0104	0.0299796	21.0683	-0.253637	NA	41.5723	-1.58487	0.000831968	20.4798	-0.28933	NA
ALDOA_NM_184043	ALDOA	NM_184043	ENSG00000149925	77.4654	-0.430338	0.175981	152.924	-0.566911	0.0817861	53.8586	-1.20912	0.0087212	101.667	-1.57248	8.84645e-06	51.2057	-1.45345	0.000849778	96.5893	-1.88947	1.51629e-08
GSN_NM_001258029	GSN	NM_001258029	ENSG00000148180	66.2788	-0.554565	NA	103.46	-0.444947	0.160195	55.0852	-0.709951	0.107949	77.0683	-0.902155	0.0173353	44.4725	-1.56587	0.000849778	66.255	-1.53474	0.000103827
ST7L_NM_001308264	ST7L	NM_001308264	ENSG00000007341	131.162	-0.415654	0.140877	119.391	-0.501077	0.124672	104.355	-0.701148	0.0603132	93.9817	-0.768261	0.0298855	91.9108	-1.16036	0.000854438	84.014	-1.2147	0.0010465
NARF_NM_001083608	NARF	NM_001083608	ENSG00000141562	73.6874	-0.521736	0.116843	47.8492	-0.343742	NA	58.0187	-0.875681	0.0509103	39.4908	-0.452626	0.298495	50.3561	-1.45595	0.000854438	39.9399	-0.421103	0.383158
MAPKAPK3_NM_001243926	MAPKAPK3	NM_001243926	ENSG00000114738	95.7982	-0.148729	0.577827	72.5831	-0.321926	NA	62.4662	-1.05311	0.0145898	49.0668	-1.10289	0.0112215	57.8461	-1.38821	0.000854882	47.7474	-1.22848	0.00520178
SREBF1_NM_001005291	SREBF1	NM_001005291	ENSG00000072310	90.908	-0.563023	0.0931564	71.4466	-0.443208	NA	65.1608	-1.29767	0.00271752	53.9398	-0.834763	0.0453212	64.1531	-1.3537	0.000856526	49.5207	-1.17916	0.00691092
THOC1_NM_005131	THOC1	NM_005131	ENSG00000079134	113.487	-0.394868	0.156048	39.4961	-0.278008	NA	78.9367	-1.20719	0.00322691	32.5191	-0.394809	NA	78.0206	-1.23338	0.000857064	29.1521	-0.725587	0.169224
TBKBP1_NM_014726	TBKBP1	NM_014726	ENSG00000198933	58.442	-0.664207	NA	49.0772	-0.307678	NA	43.8481	-1.27395	0.00704743	40.0966	-0.435867	0.306538	41.2645	-1.56008	0.00085935	37.1678	-0.632996	0.207931
TXN_NM_001244938	TXN	NM_001244938	ENSG00000136810	73.4477	-0.463401	0.142579	53.0258	-0.258462	NA	53.5948	-1.0848	0.0145313	40.5644	-0.573173	0.189752	49.2482	-1.45174	0.000860356	41.2141	-0.510098	0.28302
NDRG1_NM_001135242	NDRG1	NM_001135242	ENSG00000104419	99.502	-0.561173	0.0827867	67.7999	-0.178221	NA	77.8725	-0.943169	0.0198346	57.479	-0.167376	0.670764	71.7885	-1.25745	0.000887973	55.6474	-0.239746	0.578015
FOXP2_NR_033766	FOXP2	NR_033766	ENSG00000128573	132.182	-0.177781	0.458856	128.902	-0.368425	0.213237	90.2975	-0.953599	0.0126953	99.8469	-0.676755	0.0585319	84.7849	-1.19274	0.00089087	90.585	-1.01205	0.00592588
GAPDH_NM_001289746	GAPDH	NM_001289746	ENSG00000111640	100.444	-0.547088	0.0941067	66.036	-0.317783	NA	76.9748	-0.991081	0.0142583	56.8082	-0.2751	0.514688	71.5123	-1.27778	0.000895128	56.7162	-0.270018	0.545521
MTMR9_NM_015458	MTMR9	NM_015458	ENSG00000104643	71.9512	-0.685013	0.0648101	74.0629	-0.418136	NA	59.5662	-0.905239	0.0363181	67.8866	-0.223838	0.539875	52.5597	-1.41449	0.000903518	61.1851	-0.521227	0.210085
TRIM25_NM_005082	TRIM25	NM_005082	ENSG00000121060	93.2868	-0.534261	0.106641	59.1568	-0.428698	NA	74.0833	-0.859216	0.0407229	46.768	-0.64516	0.1394	65.526	-1.34383	0.000907873	44.0293	-0.880041	0.0542958
MRPL33_NM_004891	MRPL33	NM_004891	ENSG00000243147	73.5089	-0.52758	0.116017	165.607	-0.522774	0.106884	59.4885	-0.788975	0.0690235	117.09	-1.23455	0.000681737	50.5711	-1.4534	0.000907873	104.671	-1.83249	1.52971e-07
SPAG7_NM_004890	SPAG7	NM_004890	ENSG00000091640	70.6766	-0.654906	0.0725485	48.4878	-0.294043	NA	56.3251	-1.00414	0.0224869	40.9564	-0.3327	0.439366	50.2338	-1.47842	0.000912594	37.6787	-0.531771	0.294764
APOBR_NM_018690	APOBR	NM_018690	ENSG00000184730	67.5886	-0.761186	NA	127.853	-0.713224	0.0467468	55.5498	-1.01125	0.0217837	90.9701	-1.44433	0.00010016	50.2326	-1.43851	0.000921528	84.0187	-1.93818	4.04812e-08
ATHL1_NM_025092	ATHL1	NM_025092	ENSG00000142102	72.9698	-0.711632	0.0604985	31.9161	-0.197098	NA	57.506	-1.10221	0.0117175	24.9576	-0.423311	NA	53.2161	-1.42355	0.000922912	23.7704	-0.573717	NA
ARHGAP4_NM_001164741	ARHGAP4	NM_001164741	ENSG00000089820	66.7939	-0.506001	NA	96.5753	-0.552127	0.109542	49.2177	-1.10544	0.0165246	72.8036	-0.992223	0.0101815	44.7898	-1.5111	0.000929492	67.7577	-1.304	0.000702039
DNAJA2_NM_005880	DNAJA2	NM_005880	ENSG00000069345	50.9285	-0.609332	NA	33.6621	-0.458228	NA	43.5064	-0.713905	0.13125	29.9298	-0.427754	NA	34.8586	-1.64443	0.00093758	29.2871	-0.466585	0.377885
LAMP5_NM_001199897	LAMP5	NM_001199897	ENSG00000125869	121.857	-0.0658547	0.800112	143.584	-0.0530374	0.819629	95.3421	-0.342007	0.383588	101.379	-0.591207	0.0934269	72.3931	-1.32318	0.000942946	92.8544	-0.890445	0.0119572
ERICH4_NM_001130514	ERICH4	NM_001130514	ENSG00000204978	88.7251	-0.673746	0.0617975	95.3482	-0.82671	0.0389056	67.0795	-1.19421	0.00742678	75.1338	-1.16509	0.00228205	65.2707	-1.32616	0.000944978	70.1694	-1.49807	9.87387e-05
FADD_NM_003824	FADD	NM_003824	ENSG00000168040	78.3465	-0.464249	0.138805	41.0855	-0.44285	NA	57.7835	-1.05418	0.0178753	35.3236	-0.45549	NA	53.1442	-1.40092	0.000949144	31.5081	-0.835281	0.110446
XPO4_NM_022459	XPO4	NM_022459	ENSG00000132953	67.3663	-0.534287	NA	53.0264	-0.428527	NA	47.6628	-1.30616	0.00477461	44.4706	-0.499674	0.232831	46.1623	-1.48107	0.000949144	39.6989	-0.868074	0.0670131
FAM134A_NM_024293	FAM134A	NM_024293	ENSG00000144567	96.6051	-0.749926	0.0437233	54.2901	0.000519573	NA	78.628	-1.03005	0.0100203	36.6038	-0.60629	NA	74.3514	-1.24395	0.000949144	40.8918	-0.28087	0.560654
DLGAP4-AS1_NR_109939	DLGAP4-AS1	NR_109939	ENSG00000232907	65.6004	-0.292212	NA	44.0472	-0.370079	NA	44.7153	-1.09498	0.0196339	34.4119	-0.620966	NA	39.7175	-1.60549	0.000949144	34.8524	-0.615835	0.220915
MCM5_NM_006739	MCM5	NM_006739	ENSG00000100297	98.3828	-0.440254	0.142991	43.848	0.0585509	NA	79.3556	-0.692406	0.0929641	30.2677	-0.408873	NA	66.4596	-1.36292	0.000949144	31.1653	-0.304392	0.570963
TRABD_NM_025204	TRABD	NM_025204	ENSG00000170638	62.5507	-0.574554	NA	41.0355	-0.149756	NA	51.5026	-0.787477	0.0833992	32.3614	-0.312573	NA	42.9842	-1.53872	0.000949144	27.1422	-0.873088	NA
JADE2_NM_015288	JADE2	NM_015288	ENSG00000043143	81.0478	-0.634013	0.0722069	60.7646	-0.406729	NA	63.385	-1.0421	0.0149795	49.4433	-0.545578	0.189284	58.7707	-1.35396	0.000949144	41.1561	-1.22935	0.00829968
NOP16_NM_001256539	NOP16	NM_001256539	ENSG00000048162	67.3174	-0.503239	NA	54.648	-0.405037	NA	53.4076	-0.831169	0.0645286	38.0401	-1.13113	NA	45.0677	-1.52133	0.000953212	35.2504	-1.4815	0.00257978
UPF2_NM_080599	UPF2	NM_080599	ENSG00000151461	72.6363	-0.531335	0.117564	65.0408	-0.43967	NA	53.7705	-1.12977	0.0133243	51.6819	-0.669892	0.10149	49.8115	-1.47726	0.000962097	46.8775	-1.01952	0.0223484
SLC26A2_NM_000112	SLC26A2	NM_000112	ENSG00000155850	64.4859	-0.545524	NA	26.6332	0.2478	NA	47.4267	-1.17288	0.0121831	21.8979	0.237709	NA	43.7864	-1.51847	0.000962097	20.0204	0.093605	NA
RAB33A_NM_004794	RAB33A	NM_004794	ENSG00000134594	44.4362	-0.754181	NA	68.4558	-0.364451	NA	31.8508	-1.62131	0.00196146	43.3228	-1.40117	0.00237575	31.3025	-1.72671	0.000964404	37.5109	-1.20931	0.0909138
DDX50_NM_024045	DDX50	NM_024045	ENSG00000107625	87.1766	-0.537002	0.100771	47.7678	-0.366115	NA	68.6057	-0.896496	0.0297611	35.3596	-0.819933	NA	61.2832	-1.33333	0.000974567	34.794	-0.888377	0.0734679
MYL12A_NM_001303048	MYL12A	NM_001303048	ENSG00000101608	80.7123	-0.516081	0.115527	66.7908	-0.110352	NA	67.7204	-0.63631	0.124138	52.1668	-0.320536	0.41529	55.8504	-1.38142	0.000974567	48.047	-0.542295	0.226592
DCUN1D3_NM_173475	DCUN1D3	NM_173475	ENSG00000188215	62.9967	-0.540765	NA	36.8807	-0.0482013	NA	45.5289	-1.23796	0.00916425	24.609	-0.652901	NA	42.6772	-1.54374	0.000982731	28.5862	-0.248787	0.645948
RNASE2_NM_002934	RNASE2	NM_002934	ENSG00000169385	50.5936	-0.7477	NA	74.3266	-0.759313	NA	43.077	-0.882156	0.0643849	55.975	-1.28306	0.0022386	35.8328	-1.64839	0.000986298	53.4182	-1.52526	0.000290866
CDC42EP3_NM_001270436	CDC42EP3	NM_001270436	ENSG00000163171	89.8285	-0.260016	0.337694	95.0324	-0.439391	0.167981	60.7168	-1.09905	0.0108072	67.8159	-1.06314	0.00750151	56.6502	-1.38086	0.000986298	65.8279	-1.18998	0.00247569
DCTD_NM_001012732	DCTD	NM_001012732	ENSG00000129187	69.8879	-0.624928	0.0798826	66.0308	-0.63801	NA	56.9954	-0.878009	0.0439792	44.4251	-1.67612	0.000222793	49.8432	-1.42708	0.000986298	46.938	-1.409	0.00158654
HIST2H2AB_NM_175065	HIST2H2AB	NM_175065	ENSG00000184270	77.9342	-0.662806	0.0673482	126.801	-0.265094	0.339365	64.321	-0.879248	0.0416591	114.881	-0.085852	0.791841	56.4552	-1.4014	0.000986969	104.004	-0.321729	0.38073
ZBED4_NM_014838	ZBED4	NM_014838	ENSG00000100426	125.951	-0.467071	0.107656	51.6591	-0.0305596	NA	98.0418	-0.845477	0.0235423	36.8911	-0.482183	NA	89.8981	-1.17581	0.000993516	34.3843	-0.701409	0.160548
NAA60_NM_001083600	NAA60	NM_001083600	ENSG00000122390	78.159	-0.486953	0.128896	43.1129	-0.322749	NA	60.2648	-0.913815	0.0346072	36.8655	-0.357464	NA	53.5233	-1.40222	0.0010015	35.9271	-0.407676	0.410217
LGALS12_NM_001142537	LGALS12	NM_001142537	ENSG00000133317	74.266	-0.492928	0.128219	29.6078	0.0981118	NA	58.9888	-0.789895	0.0681513	24.6899	0.095934	NA	50.3361	-1.4303	0.00100718	21.464	-0.219719	NA
UBAP2L_NM_001287815	UBAP2L	NM_001287815	ENSG00000143569	89.5706	-0.626595	0.0673482	59.7349	-0.392194	NA	75.2801	-0.767086	0.059266	48.1836	-0.582917	0.158233	65.4305	-1.32176	0.00102126	44.0132	-0.877382	0.0553302
TEX22_NM_001195082	TEX22	NM_001195082	ENSG00000226174	96.761	-0.617009	0.0656974	57.4721	-0.377511	NA	72.7832	-1.17525	0.00366226	41.5026	-0.914995	0.0411758	70.9289	-1.25656	0.00102348	40.0194	-1.04061	0.0286307
SNORA9_NR_002952	SNORA9	NR_002952	ENSG00000277184	106.531	-0.479168	0.115527	70.5405	0.0892507	NA	78.811	-1.04952	0.00923535	49.8403	-0.329227	0.415855	75.1919	-1.23541	0.00102946	44.8914	-0.634098	0.167417
IQCH-AS1_NR_040055	IQCH-AS1	NR_040055	N/A	89.6937	-0.503816	0.110623	44.264	-0.6284	NA	69.8851	-0.889149	0.0297611	36.5172	-0.815733	NA	62.8101	-1.30458	0.00103387	39.4239	-0.574206	0.243319
HDAC2_NR_073443	HDAC2	NR_073443	ENSG00000196591	67.7648	-0.517525	NA	57.9742	-0.444887	NA	53.9364	-0.823883	0.0612138	47.143	-0.609928	0.142463	46.1022	-1.46568	0.00103464	42.5253	-0.962323	0.0372819
SELPLG_NM_001206609	SELPLG	NM_001206609	ENSG00000110876	80.5245	-0.54449	0.104954	91.9295	-0.502392	0.138458	64.1906	-0.863639	0.041008	72.6674	-0.767161	0.0465572	56.6788	-1.37167	0.00103783	69.3267	-0.942744	0.0183714
LOC81691_NM_001144924	LOC81691	NM_001144924	ENSG00000005189	71.4003	-0.477343	0.145057	110.176	-0.489358	0.130235	56.014	-0.835554	0.0609153	83.5665	-0.896806	0.0163037	47.6508	-1.48797	0.0010435	74.7412	-1.36126	0.000210732
ZNF598_NM_178167	ZNF598	NM_178167	ENSG00000167962	93.0054	-0.712327	0.0581549	41.4594	-0.387424	NA	73.1105	-1.10067	0.00725774	33.1676	-0.585025	NA	70.0474	-1.26352	0.00104402	32.8903	-0.595162	0.25153
ATP2B4_NM_001001396	ATP2B4	NM_001001396	ENSG00000058668	80.9952	-0.596912	0.0801715	51.9919	-0.0759667	NA	58.413	-1.33929	0.00236527	37.691	-0.490034	NA	57.7573	-1.35716	0.00105319	35.8839	-0.61914	0.214622
HMGCS1_NM_001098272	HMGCS1	NM_001098272	ENSG00000112972	47.5141	-0.936524	NA	30.8713	-0.0216764	NA	41.1003	-1.08614	0.0300252	22.9592	-0.330083	NA	36.4259	-1.6605	0.00105319	25.9651	-0.0186517	NA
MKS1_NM_001165927	MKS1	NM_001165927	ENSG00000011143	57.9875	-0.700231	NA	65.5461	-0.616947	NA	53.1541	-0.568246	0.202196	52.3329	-0.867795	0.0387256	41.4391	-1.54923	0.00105806	48.4929	-1.12313	0.0164401
TNPO2_NM_001136196	TNPO2	NM_001136196	ENSG00000105576	90.0864	-0.685528	0.0583325	70.8245	0.0382815	NA	73.8656	-0.933076	0.0207249	56.788	-0.0890502	0.816609	67.8529	-1.26318	0.00105806	50.4283	-0.405875	0.36107
SREBF2_NM_004599	SREBF2	NM_004599	ENSG00000198911	70.2776	-0.551504	0.106641	90.8149	-0.443887	0.171683	58.6042	-0.705379	0.0994125	69.5161	-0.803227	0.0385061	48.6142	-1.44036	0.00107152	60.9586	-1.3204	0.00121323
PLK2_NM_001252226	PLK2	NM_001252226	ENSG00000145632	65.0186	-0.551039	NA	32.8628	0.168068	NA	52.9343	-0.794171	0.0797494	23.233	-0.184553	NA	44.8099	-1.47833	0.00107541	25.9952	0.0982859	NA
RCC2_NM_001136204	RCC2	NM_001136204	ENSG00000179051	99.9529	-0.381108	0.178507	73.4675	-0.273778	NA	76.7259	-0.771813	0.0556681	51.3287	-0.896124	0.0337136	67.7298	-1.26036	0.00110105	44.7519	-1.46133	0.00120156
LOC100996338_NR_126340	LOC100996338	NR_126340	ENSG00000259517	71.8878	-0.673712	0.0656974	87.7012	-0.764428	0.0534516	50.5041	-1.58537	0.000520699	63.6918	-1.48174	0.000271948	52.4061	-1.39904	0.00110195	58.3008	-2.02742	1.05733e-06
TAB1_NM_006116	TAB1	NM_006116	ENSG00000100324	67.2476	-0.574731	NA	84.0852	-0.655416	0.0797065	51.2767	-1.08194	0.0181628	61.125	-1.2748	0.0018527	46.7077	-1.48431	0.00112566	60.777	-1.32693	0.000944139
NMRAL1_NM_001305141	NMRAL1	NM_001305141	ENSG00000153406	71.0076	-0.647236	0.0801715	41.8554	-0.255157	NA	53.5321	-1.23302	0.0101775	33.4391	-0.437978	NA	49.9569	-1.52974	0.0011263	29.0635	-0.89523	0.0951882
ZEB2_NM_001171653	ZEB2	NM_001171653	ENSG00000169554	116.881	-0.318482	0.244109	237.511	-0.122863	0.593634	91.4005	-0.653026	0.108578	169.736	-0.643836	0.0577441	77.5569	-1.281	0.00112656	146.549	-1.21415	0.000152614
MAD1L1_NM_001304525	MAD1L1	NM_001304525	ENSG00000002822	80.0365	-0.384126	0.194349	115.623	-0.631462	0.0762746	58.9529	-0.927513	0.0366656	78.4242	-1.59755	1.80375e-05	52.9906	-1.38631	0.00112656	73.6835	-1.94129	3.06974e-07
TOB1_NM_001243885	TOB1	NM_001243885	ENSG00000141232	80.4398	-0.477649	0.132123	37.0865	0.183919	NA	59.0386	-1.07894	0.0125396	29.5649	0.0954464	NA	55.2027	-1.36734	0.00113103	24.3761	-0.333348	NA
LONRF3_NM_001289109	LONRF3	NM_001289109	ENSG00000175556	47.4309	-0.817926	NA	25.4297	-0.353435	NA	36.1852	-1.42246	0.0045187	19.1091	-0.72934	NA	34.7361	-1.63192	0.00113256	18.9307	-0.814539	NA
GMFG_NM_001301008	GMFG	NM_001301008	ENSG00000130755	89.1892	-0.40774	0.170633	116.004	-0.466946	0.138458	68.3982	-0.821756	0.0465767	86.7142	-0.914984	0.0128417	60.1736	-1.337	0.0011441	74.7213	-1.54366	5.99879e-05
PLEKHM3_NM_001080475	PLEKHM3	NM_001080475	ENSG00000178385	66.2568	-0.549968	NA	35.4396	-0.0052164	NA	53.4927	-0.831985	0.0631018	27.5816	-0.206667	NA	45.8966	-1.46658	0.00115355	31.8888	0.14753	0.790623
SNORD95_NR_002591	SNORD95	NR_002591	ENSG00000264549	99.7999	-0.37897	0.178507	89.9371	-0.331045	0.280845	69.4897	-1.1646	0.00443859	68.7672	-0.666029	0.0798054	67.3209	-1.27112	0.00115355	66.6625	-0.75301	0.0560276
DPYSL2_NM_001386	DPYSL2	NM_001386	ENSG00000092964	96.2846	-0.418593	0.149402	92.7386	-0.184629	0.513115	69.7087	-1.05173	0.0107897	69.6694	-0.534574	0.168815	65.7216	-1.27932	0.00115355	62.4051	-0.898303	0.0345832
EPB41_NM_001166005	EPB41	NM_001166005	ENSG00000159023	55.987	-0.777665	NA	36.9972	-0.0830559	NA	45.938	-1.05128	0.0251504	27.9441	-0.379465	NA	40.8443	-1.54837	0.00115702	25.8833	-0.56092	NA
MICAL2_NM_001282666	MICAL2	NM_001282666	ENSG00000133816	60.5939	-0.927613	NA	49.7389	-0.379582	NA	49.4298	-1.22736	0.00829121	34.7545	-1.01763	NA	47.4642	-1.44319	0.0011717	37.1419	-0.819393	0.097434
ZNF131_NM_001297548	ZNF131	NM_001297548	ENSG00000172262	69.9455	-0.716513	0.059311	40.8152	-0.136283	NA	53.531	-1.2289	0.00613783	32.0121	-0.342957	NA	51.7196	-1.38743	0.00117262	29.8473	-0.513756	0.332758
DPY19L3_NM_001172774	DPY19L3	NM_001172774	ENSG00000178904	86.9118	-0.42959	0.149439	58.0813	-0.408664	NA	63.8839	-1.01385	0.0161788	40.7451	-1.06782	0.0215902	59.3658	-1.31559	0.00118159	44.3493	-0.765051	0.0967627
YTHDF2_NM_001173128	YTHDF2	NM_001173128	ENSG00000198492	79.8795	-0.467725	0.140592	72.9001	-0.343235	NA	60.9406	-0.929258	0.0355097	58.7682	-0.515337	0.188834	54.3949	-1.393	0.00118203	55.9989	-0.659757	0.120017
B9D2_NM_030578	B9D2	NM_030578	ENSG00000123810	120.582	-0.511813	0.10049	57.3786	-0.329685	NA	93.1646	-0.924316	0.0142583	47.7863	-0.396757	0.32933	87.2586	-1.15402	0.00118341	47.8059	-0.370715	0.412715
PARVB_NM_013327	PARVB	NM_013327	ENSG00000188677	67.3014	-0.412936	NA	75.9222	-0.551608	0.129063	48.8346	-1.05089	0.0224443	57.0633	-1.01499	0.0160423	44.0942	-1.48151	0.00118341	52.0283	-1.39737	0.00136763
IL16_NM_004513	IL16	NM_004513	ENSG00000172349	69.0472	-0.457249	0.152401	65.6488	-0.636768	NA	48.55	-1.23013	0.00754918	50.3231	-1.04202	0.0152229	46.2458	-1.45057	0.0011978	44.0616	-1.69493	0.000213854
LINC01353_NR_117098	LINC01353	NR_117098	N/A	70.2361	-0.539514	0.115868	87.5433	-0.366313	0.257918	58.0804	-0.707831	0.103608	64.4844	-0.797335	0.0563212	48.777	-1.41701	0.00120485	56.0523	-1.42813	0.000504993
AMPD2_NM_004037	AMPD2	NM_004037	ENSG00000116337	61.0231	-0.607821	NA	22.7797	-0.212702	NA	49.6697	-0.866057	0.0609934	16.753	-0.588671	NA	42.1349	-1.54417	0.0012095	21.7628	0.00835803	NA
PSMA1_NM_148976	PSMA1	NM_148976	ENSG00000129084	121.945	-0.420602	0.134577	140.847	-0.418714	0.16314	94.6754	-0.792393	0.0349757	110.238	-0.696223	0.0519528	84.9525	-1.17923	0.00122575	87.515	-1.69006	3.20433e-06
CTF1_NM_001142544	CTF1	NM_001142544	ENSG00000150281	62.3691	-0.526273	NA	57.5851	-0.629602	NA	48.0702	-0.970562	0.0349398	40.072	-1.45282	0.00189043	42.5256	-1.49411	0.00122806	38.5218	-1.68142	0.000502871
UBA7_NM_003335	UBA7	NM_003335	ENSG00000182179	48.9309	-0.412265	NA	61.7627	-0.328117	NA	37.2701	-0.879407	0.090725	46.8191	-0.688411	0.101	30.8206	-1.72636	0.00122806	41.5983	-1.12202	0.015511
RAPGEF6_NM_001164386	RAPGEF6	NM_001164386	ENSG00000158987	74.8302	-0.410075	0.179146	46.4874	-0.0011478	NA	57.6887	-0.808192	0.0643941	35.6448	-0.234261	NA	48.6554	-1.46744	0.00122806	34.4994	-0.311259	0.540509
MIR718_NR_031757	MIR718	NR_031757	ENSG00000284286	66.7308	-0.931638	NA	78.5093	-0.211452	0.457426	52.7107	-1.41358	0.00225808	53.2175	-0.922808	0.0287568	52.5407	-1.39799	0.00122806	46.2	-1.51779	0.000664309
PIGBOS1_NM_001308421	PIGBOS1	NM_001308421	ENSG00000225973	74.7033	-0.320618	0.271785	97.557	-0.546395	0.11104	60.4216	-0.549989	0.197438	77.6515	-0.798531	0.0380725	47.8861	-1.4332	0.00123396	64.848	-1.57665	7.03996e-05
CAP1_NM_001105530	CAP1	NM_001105530	ENSG00000131236	101.667	-0.400627	0.156931	50.6405	0.0601627	NA	73.299	-1.05637	0.0092466	38.848	-0.16374	0.706232	69.8415	-1.23694	0.00123563	36.5451	-0.284385	0.585652
INF2_NM_001031714	INF2	NM_001031714	ENSG00000203485	58.2435	-0.491589	NA	44.0489	-0.133397	NA	42.6874	-1.09816	0.0212556	35.8659	-0.242055	NA	38.5869	-1.57776	0.00126004	31.5168	-0.574787	0.270023
PRR12_NM_020719	PRR12	NM_020719	ENSG00000126464	89.9234	-0.443895	0.140963	88.6495	-0.133571	0.619743	70.1764	-0.790742	0.0573599	68.8264	-0.37931	0.300408	61.897	-1.2931	0.0012644	62.7161	-0.6495	0.109295
MAT2B_NM_013283	MAT2B	NM_013283	ENSG00000038274	68.2573	-0.204307	NA	33.4733	0.00532317	NA	47.2038	-0.934618	0.0477767	26.4728	-0.131627	NA	40.8965	-1.53556	0.0012644	25.4348	-0.220234	NA
RRM2_NM_001034	RRM2	NM_001034	ENSG00000171848	94.9707	-0.167687	0.52841	66.7743	-0.117941	NA	63.7454	-0.966253	0.0233574	54.2549	-0.220713	0.579331	58.1164	-1.33763	0.00126573	51.5122	-0.33445	0.45921
SF3B4_NM_005850	SF3B4	NM_005850	ENSG00000143368	83.3834	-0.724209	0.0581549	76.6733	-0.428963	0.196976	68.4616	-0.975089	0.0212556	60.4203	-0.702209	0.0764101	63.0667	-1.29935	0.00126866	56.5281	-0.933436	0.0248175
ERLIN1_NM_006459	ERLIN1	NM_006459	ENSG00000107566	87.1976	-0.58179	0.0892728	87.843	-0.341406	0.275807	69.7729	-0.910267	0.0297611	74.9018	-0.355146	0.340274	62.6681	-1.31813	0.00126866	59.817	-1.1056	0.00816533
HIGD2A_NM_138820	HIGD2A	NM_138820	ENSG00000146066	53.3316	-0.422458	NA	68.6922	-0.473924	NA	37.3248	-1.22397	0.0137034	54.3709	-0.733964	0.0779636	34.2137	-1.62041	0.00126866	45.5746	-1.43255	0.00166273
DEPDC5_NM_001007188	DEPDC5	NM_001007188	ENSG00000100150	87.0074	-0.554748	0.0941067	36.6963	-0.172426	NA	62.9545	-1.26039	0.00322691	31.2908	-0.183915	NA	62.1241	-1.28981	0.00127699	28.6737	-0.385112	0.474838
PARVB_NM_001243386	PARVB	NM_001243386	ENSG00000188677	86.0841	-0.515255	0.108787	95.9563	-0.701762	0.056857	62.8456	-1.15858	0.00616179	75.4008	-1.02271	0.00750151	60.5248	-1.2992	0.00128685	64.3217	-1.47626	0.015511
LINC00471_NR_024079	LINC00471	NR_024079	ENSG00000181798	88.0365	-0.561663	0.0930897	50.4035	-0.37479	NA	65.3991	-1.15916	0.00613783	43.7471	-0.353952	0.411162	62.9442	-1.29193	0.0012891	40.4801	-0.565355	0.237512
CDPF1_NM_207327	CDPF1	NM_207327	ENSG00000205643	128.528	-0.508424	0.0974022	48.7073	-0.399865	NA	94.3644	-1.14343	0.00273164	39.014	-0.620181	0.156912	93.8707	-1.13014	0.0012891	38.2708	-0.661311	0.174315
KEAP1_NM_203500	KEAP1	NM_203500	ENSG00000079999	119.606	-0.4461	0.120721	132.155	-0.304534	0.27472	92.4307	-0.828207	0.0369856	100.561	-0.651036	0.0585319	84.7373	-1.16009	0.00128927	87.718	-1.1342	0.00149903
ABHD15_NM_198147	ABHD15	NM_198147	ENSG00000168792	80.7979	-0.487929	0.131329	110.821	-0.343374	0.251326	58.0298	-1.18509	0.00752451	74.7041	-1.13067	0.00506641	54.835	-1.40553	0.00129013	73.6513	-1.21038	0.00157389
UTP11L_NM_016037	UTP11L	NM_016037	ENSG00000183520	55.2358	-0.741172	NA	51.8204	-0.16834	NA	42.2982	-1.29031	0.00675279	41.0963	-0.361498	0.390137	39.7282	-1.56065	0.00129441	42.0585	-0.291955	0.545347
DCANP1_NM_130848	DCANP1	NM_130848	ENSG00000251380	91.5657	-0.450573	0.145057	87.9646	-0.380152	0.239688	69.1359	-0.922635	0.0273604	64.1854	-0.881806	0.028538	63.0564	-1.28957	0.00132048	61.8716	-0.982647	0.0222023
DDX59_NM_001031725	DDX59	NM_001031725	ENSG00000118197	56.7525	-0.677586	NA	53.1122	-0.196949	NA	46.1833	-0.983157	0.0405092	39.7406	-0.574551	0.19638	40.7394	-1.54946	0.00132243	33.3926	-1.19429	0.0182142
CLN3_NM_000086	CLN3	NM_000086	ENSG00000188603	67.1456	-0.344406	NA	49.4477	-0.392157	NA	48.8304	-0.935204	0.0394441	35.2685	-0.928429	NA	42.854	-1.47617	0.00132352	33.8891	-1.14306	0.0220323
HIST1H3C_NM_003531	HIST1H3C	NM_003531	ENSG00000278272	157.467	-0.504257	0.0931564	86.1774	-0.403181	0.222637	122.902	-0.890231	0.0174007	82.0866	-0.114053	0.761603	115.882	-1.10277	0.00132479	70.0767	-0.552017	0.183242
WDR49_NM_178824	WDR49	NM_178824	ENSG00000174776	55.4973	-0.469779	NA	51.5339	-0.224107	NA	44.8447	-0.57591	0.346973	42.4081	-0.338313	0.450345	35.9546	-1.68339	0.00132923	36.6921	-0.769073	0.131239
HCFC1_NM_005334	HCFC1	NM_005334	ENSG00000172534	96.3272	-0.325099	0.235756	66.2156	-0.567407	NA	70.334	-0.8976	0.0330367	49.4263	-1.06024	0.014457	63.8046	-1.27254	0.00133425	48.2732	-1.17816	0.00868258
ETFB_NM_001985	ETFB	NM_001985	ENSG00000105379	91.6737	-0.337929	0.22891	70.5716	-0.219503	NA	66.5878	-0.932248	0.0259273	58.7592	-0.267133	0.482735	59.4292	-1.36035	0.00133771	51.497	-0.639316	0.145703
HNRNPA3_NM_194247	HNRNPA3	NM_194247	ENSG00000170144	72.2934	-0.650546	0.0753713	70.5931	-0.292906	NA	60.3488	-0.828526	0.0669189	52.3643	-0.724727	0.0805812	52.376	-1.39893	0.00133823	46.542	-1.16426	0.00876102
TLE3_NM_001105192	TLE3	NM_001105192	ENSG00000140332	60.6887	-0.557565	NA	68.1804	-0.474746	NA	46.7779	-0.984335	0.0383806	50.9305	-0.913049	0.0321356	41.611	-1.53809	0.00133929	51.0262	-0.915862	0.0341487
CSNK1E_NM_152221	CSNK1E	NM_152221	ENSG00000213923	78.1118	-0.777401	0.0487274	56.3102	-0.252718	NA	55.8391	-1.64716	0.000217477	47.6271	-0.288738	0.477022	59.8879	-1.30775	0.00135564	39.4032	-0.860855	0.0710028
CBLN3_NM_001039771	CBLN3	NM_001039771	ENSG00000139899	74.7676	-0.508417	0.117572	45.5539	-0.793449	NA	54.8115	-1.13855	0.0104506	38.8045	-0.866258	0.0547824	50.8289	-1.4278	0.00137166	35.5067	-1.20135	0.0155774
GMNN_NM_001251989	GMNN	NM_001251989	ENSG00000112312	45.0514	-0.567175	NA	43.0955	-0.253358	NA	35.4601	-0.961541	0.0645339	34.2817	-0.434828	NA	29.8679	-1.75393	0.0013752	33.7218	-0.474161	0.35192
RPS11_NM_001015	RPS11	NM_001015	ENSG00000142534	70.7296	-0.34692	0.243913	93.7058	-0.419214	0.1877	51.2852	-0.961256	0.036179	75.2023	-0.614988	0.0955656	45.7632	-1.45112	0.00137858	69.1895	-0.896135	0.0212882
ZNF131_NM_003432	ZNF131	NM_003432	ENSG00000172262	71.7314	-0.690869	0.0612912	41.0251	-0.146648	NA	54.5045	-1.2265	0.00577674	32.1894	-0.354783	NA	52.9603	-1.35455	0.00138251	30.0217	-0.526221	0.321354
RPL27A_NM_000990	RPL27A	NM_000990	ENSG00000166441	81.3617	-0.707889	0.0581549	87.4328	-0.473153	0.153493	63.8744	-1.1238	0.00808562	65.5852	-0.914596	0.0219377	61.2619	-1.29197	0.00138719	61.8672	-1.12624	0.00607497
CIZ1_NM_001131016	CIZ1	NM_001131016	ENSG00000148337	88.5666	-0.450071	0.13907	38.4495	-0.344893	NA	70.3275	-0.756727	0.0647563	32.3565	-0.430021	NA	60.0854	-1.34451	0.00138876	32.2838	-0.434754	0.400939
ALAS1_NM_000688	ALAS1	NM_000688	ENSG00000023330	77.4815	-0.648084	0.0682296	49.0135	-0.270331	NA	59.7732	-1.12304	0.00913885	39.1008	-0.441728	0.310097	55.8109	-1.37803	0.00141297	41.22	-0.295579	0.534071
HVCN1_NM_032369	HVCN1	NM_032369	ENSG00000122986	79.9192	-0.5698	0.10073	52.2059	-0.274334	NA	56.6098	-1.37585	0.00173818	37.9446	-0.742059	NA	57.1828	-1.31397	0.00143342	34.2118	-1.09541	0.0315959
TNNI2_NM_001145829	TNNI2	NM_001145829	ENSG00000130598	53.4368	-0.530756	NA	44.7476	-0.609298	NA	42.8556	-0.829135	0.078352	35.5842	-0.893174	NA	35.904	-1.56714	0.00143755	33.2362	-0.900352	0.192498
KCNA3_NR_109845	KCNA3	NR_109845	N/A	75.1726	-0.557691	0.106641	81.0366	-0.605495	0.0960086	57.6146	-1.01713	0.0224443	62.8031	-0.968778	0.0167566	52.6314	-1.39445	0.00144494	52.5836	-1.81015	2.08222e-05
TMEM128_NM_001297551	TMEM128	NM_001297551	ENSG00000132406	57.0935	-0.835091	NA	35.1945	-0.254061	NA	45.5068	-1.27387	0.0076513	29.0088	-0.379107	NA	43.4155	-1.51801	0.00144494	25.03	-0.781394	NA
HSP90AA1_NM_005348	HSP90AA1	NM_005348	ENSG00000080824	109.519	-0.470133	0.116017	41.0179	-0.0176514	NA	77.3302	-1.24091	0.00211552	33.6107	-0.105457	NA	78.0833	-1.17987	0.00144581	42.0916	0.433432	0.372603
SMG7_NM_001174061	SMG7	NM_001174061	ENSG00000116698	74.4839	-0.500455	0.123098	42.5949	-0.294571	NA	58.2664	-0.866037	0.0464869	31.857	-0.653282	NA	51.3914	-1.37557	0.00144599	30.9065	-0.772269	0.136306
VAV3-AS1_NR_046653	VAV3-AS1	NR_046653	ENSG00000230489	89.5985	-0.400535	0.183187	73.2769	-0.566177	NA	65.3707	-0.996225	0.0179254	56.3265	-0.922406	0.0281745	60.6994	-1.2935	0.00145446	51.3722	-1.30564	0.00254952
DENND3_NM_014957	DENND3	NM_014957	ENSG00000105339	105.788	-0.457189	0.128185	153.876	-0.235202	0.361512	79.6866	-0.950299	0.0174007	115.913	-0.593433	0.0704459	74.4935	-1.20989	0.00145623	106.053	-0.890552	0.00692924
SCMH1_NM_001172218	SCMH1	NM_001172218	ENSG00000010803	72.6546	-0.532577	0.11322	79.9081	-0.363601	0.251326	56.0199	-0.964314	0.0278326	58.8423	-0.833976	0.0383579	50.6724	-1.38651	0.00146276	54.9694	-1.07774	0.0103293
RRP9_NM_004704	RRP9	NM_004704	ENSG00000114767	57.8951	-0.639715	NA	35.0792	0.23677	NA	42.5656	-1.31478	0.00756137	23.9932	-0.162575	NA	40.9581	-1.49153	0.00146276	24.0613	-0.15793	NA
TELO2_NM_016111	TELO2	NM_016111	ENSG00000100726	78.1198	-0.6149	0.0801715	40.1286	-0.255341	NA	61.6946	-0.995832	0.0219117	28.8309	-0.738527	NA	56.7212	-1.34388	0.00147115	27.5969	-0.916366	0.0876354
THUMPD3-AS1_NR_027007	THUMPD3-AS1	NR_027007	ENSG00000206573	75.5694	-0.561181	0.103374	37.5095	0.0435529	NA	58.1717	-1.00064	0.0214655	29.4229	-0.111046	NA	53.5429	-1.35173	0.00148236	26.0069	-0.428361	NA
PRKCQ_NM_001242413	PRKCQ	NM_001242413	ENSG00000065675	50.1216	-0.573889	NA	38.0066	-0.143332	NA	40.2394	-0.881903	0.0671042	29.9451	-0.330183	NA	34.121	-1.58599	0.00150316	30.2967	-0.31052	0.569534
LINC01521_NR_120386	LINC01521	NR_120386	N/A	45.9318	-0.544329	NA	112.577	-0.697576	0.056857	36.6138	-0.887687	0.0730255	87.4143	-1.0594	0.00360389	30.606	-1.66621	0.00150316	81.0845	-1.39891	9.05058e-05
YTHDF2_NM_016258	YTHDF2	NM_016258	ENSG00000198492	80.5778	-0.47187	0.137938	73.1169	-0.33602	NA	61.6218	-0.926229	0.0351318	58.7682	-0.515337	0.188834	55.4102	-1.35397	0.00150774	55.9989	-0.659757	0.120017
ZMIZ2_NM_031449	ZMIZ2	NM_031449	ENSG00000122515	46.9834	-0.462278	NA	26.9154	0.219638	NA	33.3835	-1.19179	0.0189982	20.5417	0.083282	NA	30.1858	-1.66266	0.00150833	19.9429	0.0569821	NA
YES1_NM_005433	YES1	NM_005433	ENSG00000176105	84.2661	-0.70244	0.0601528	55.3516	-0.0186204	NA	72.8989	-0.747879	0.0681513	42.9707	-0.255423	0.550293	63.6302	-1.26115	0.00151074	41.0201	-0.366677	0.441903
LAMP5-AS1_NR_109957	LAMP5-AS1	NR_109957	ENSG00000225988	181.501	-0.0787296	0.723255	147.719	-0.114955	0.628021	126.801	-0.73312	0.0504219	105.164	-0.649957	0.0581109	115.45	-1.05323	0.00151074	88.2495	-1.33295	0.00014768
VPS16_NM_022575	VPS16	NM_022575	ENSG00000215305	68.8054	-0.443024	NA	28.6777	-0.267162	NA	52.3152	-0.889352	0.0491029	23.1451	-0.407335	NA	45.5491	-1.45589	0.00151143	22.4973	-0.511102	NA
CABLES2_NM_031215	CABLES2	NM_031215	ENSG00000149679	53.1445	-0.489525	NA	30.5878	-0.0325419	NA	38.8869	-1.10715	0.0243666	21.7842	-0.423001	NA	35.1452	-1.57237	0.00151176	24.8799	-0.0569841	NA
CD300LB_NM_174892	CD300LB	NM_174892	ENSG00000178789	71.4428	-0.598845	0.0930897	68.5678	-0.281605	NA	56.5725	-0.954379	0.0300131	51.3992	-0.651674	0.112307	50.1018	-1.43246	0.00151822	48.2328	-0.861083	0.0537975
PRKAG2_NM_016203	PRKAG2	NM_016203	ENSG00000106617	55.1984	-0.608144	NA	67.8394	-0.262225	NA	41.5164	-1.17422	0.0142972	52.1526	-0.563869	0.162409	38.6711	-1.51425	0.00152018	47.0762	-0.899644	0.0437527
TRAF1_NM_001190945	TRAF1	NM_001190945	ENSG00000056558	85.9666	-0.43831	0.151041	87.7277	-0.387968	0.241549	60.0696	-1.23412	0.00437532	66.2193	-0.774861	0.0473604	58.4761	-1.31639	0.00152018	58.142	-1.29808	0.00143513
PTPN6_NM_002831	PTPN6	NM_002831	ENSG00000111679	97.3089	-0.568961	0.0835723	128.312	-0.533247	0.098551	75.9634	-0.945105	0.0219155	94.0975	-1.08503	0.00297624	71.0116	-1.21486	0.00153828	91.6629	-1.18239	0.000618384
CCDC9_NM_015603	CCDC9	NM_015603	ENSG00000105321	73.6904	-0.533923	0.115527	11.5421	-0.300743	NA	56.7597	-0.989389	0.0242507	12.722	0.0458708	NA	51.9146	-1.35961	0.0015425	10.5487	-0.311724	NA
LINC00657_NR_027451	LINC00657	NR_027451	ENSG00000260032	79.7679	-0.57085	0.0931564	54.4036	-0.293172	NA	63.1044	-0.919878	0.0290552	40.3211	-0.719544	0.100442	57.3465	-1.304	0.00155055	41.9589	-0.592622	0.205724
GHITM_NM_014394	GHITM	NM_014394	ENSG00000165678	49.2915	-0.725785	NA	28.376	-0.227106	NA	34.726	-1.68342	0.00150318	21.0214	-0.607681	NA	35.1335	-1.66806	0.00155581	19.7445	-0.802111	NA
RNF166_NM_001171816	RNF166	NM_001171816	ENSG00000158717	83.6426	-0.392223	0.183463	94.3052	-0.608877	0.0924988	63.9609	-0.809849	0.0535108	70.7519	-1.0858	0.00569258	55.852	-1.3325	0.00156223	65.9658	-1.39847	0.000330941
ZNF518A_NM_001278524	ZNF518A	NM_001278524	ENSG00000177853	70.507	-0.444144	0.160052	128.055	-0.415687	0.163111	55.1361	-0.817158	0.0778166	92.7949	-0.971615	0.00707423	47.1907	-1.43416	0.00157626	88.2746	-1.1837	0.00103338
SPIDR_NM_001080394	SPIDR	NM_001080394	ENSG00000164808	101.746	-0.534306	0.0974022	46.2874	-0.371568	NA	81.3379	-0.834853	0.0385328	42.6743	-0.186746	0.661593	73.4518	-1.21093	0.00159169	41.3821	-0.265027	0.587976
WDFY4_NM_020945	WDFY4	NM_020945	ENSG00000128815	81.0467	-0.50276	0.116911	40.0625	-0.305425	NA	61.5226	-0.989212	0.0200084	34.1729	-0.360727	NA	56.9882	-1.30015	0.00161879	26.9174	-1.14198	NA
MIR632_NR_030362	MIR632	NR_030362	ENSG00000283774	89.6835	-0.397748	0.183554	106.573	-0.404199	0.197151	68.5182	-0.828257	0.0504475	90.0633	-0.433368	0.221748	60.5355	-1.31598	0.00162158	80.5175	-0.785146	0.0370242
ADCY7_NM_001286057	ADCY7	NM_001286057	ENSG00000121281	65.1199	-0.373866	NA	88.5464	-0.581627	0.10138	45.2145	-1.13417	0.0153654	65.1309	-1.13421	0.00460196	41.6042	-1.48972	0.00162182	60.5844	-1.46847	0.000245737
TMC6_NM_001127198	TMC6	NM_001127198	ENSG00000141524	65.1123	-0.392313	NA	64.117	-0.555732	NA	47.4002	-0.975766	0.0360087	47.8275	-1.04777	0.0177206	41.7786	-1.5022	0.00162182	43.3696	-1.46049	0.00189058
FAM78A_NM_033387	FAM78A	NM_033387	ENSG00000126882	112.711	-0.413468	0.144794	223.198	-0.39429	0.13943	84.8069	-0.899762	0.0215179	162.913	-0.921935	0.00321107	78.8186	-1.17798	0.00162182	143.801	-1.47023	6.104e-07
LOC100128006_NR_104607	LOC100128006	NR_104607	ENSG00000265489	78.3896	-0.344412	0.237606	57.5103	-0.308449	NA	57.4107	-0.879722	0.0497176	46.603	-0.460552	0.270926	51.3714	-1.3566	0.00162463	36.2317	-1.35941	0.00546592
TMEM209_NM_001301163	TMEM209	NM_001301163	ENSG00000146842	75.1748	-0.295273	0.301753	75.2999	-0.190467	0.505025	57.4859	-0.687245	0.122961	56.1906	-0.570344	0.154568	47.4879	-1.41277	0.00163049	47.1026	-1.20171	0.00662548
CHD3_NM_001005271	CHD3	NM_001005271	ENSG00000170004	54.7321	-0.451403	NA	85.4253	-0.601979	0.0960086	41.3628	-0.937587	0.0505983	62.8681	-1.1772	0.00363809	35.0857	-1.61435	0.00163063	55.9628	-1.77095	2.07389e-05
BMS1_NM_014753	BMS1	NM_014753	ENSG00000165733	65.1717	-0.432891	NA	38.4786	-0.541742	NA	52.589	-0.701386	0.12885	32.3961	-0.672755	NA	43.49	-1.44686	0.00164604	30.8802	-0.838496	0.105531
SELPLG_NM_003006	SELPLG	NM_003006	ENSG00000110876	81.2943	-0.871716	0.0353519	99.557	-0.501885	0.138458	67.0376	-1.17337	0.00883459	75.1873	-0.934255	0.0220861	63.334	-1.3903	0.00164604	62.1546	-1.83965	8.42266e-06
SMARCE1_NM_003079	SMARCE1	NM_003079	ENSG00000073584	101.453	-0.377963	0.178471	60.3959	-0.267182	NA	74.4802	-0.952794	0.0193826	44.0558	-0.736983	0.0951186	69.4945	-1.20794	0.00164604	40.0439	-1.10511	0.0248837
GPN1_NM_001145047	GPN1	NM_001145047	ENSG00000198522	83.2898	-0.615736	0.0753713	46.6133	-0.00225365	NA	65.3261	-1.01558	0.0170238	35.7178	-0.240269	NA	60.7826	-1.28622	0.00165159	36.071	-0.199866	0.693901
B3GNT2_NM_006577	B3GNT2	NM_006577	ENSG00000170340	57.3936	-0.577173	NA	49.1795	-0.265831	NA	43.5458	-1.07307	0.0244069	40.7281	-0.358976	0.395494	39.1342	-1.5347	0.00165159	31.9566	-1.14772	0.0243352
INSIG1_NM_005542	INSIG1	NM_005542	ENSG00000186480	126.16	-0.45856	0.111435	78.4917	-0.248562	0.396377	91.8462	-1.10137	0.0040806	57.3909	-0.71117	0.0751011	91.3156	-1.09835	0.00168358	58.1551	-0.638412	0.133034
CSNK2A1_NM_001895	CSNK2A1	NM_001895	ENSG00000101266	61.8386	-0.775212	NA	44.938	-0.174236	NA	50.2765	-1.07132	0.0224462	33.7856	-0.5125	NA	46.5646	-1.39651	0.00168998	34.8293	-0.402078	0.421713
FAM195B_NM_001093767	FAM195B	NM_001093767	ENSG00000225663	134.275	-0.502324	0.0965512	77.4237	-0.453063	0.175335	106.452	-0.826856	0.0297611	52.9347	-1.18652	0.00930226	97.1932	-1.13934	0.00169186	53.6503	-1.21502	0.00427643
MIR4444-1_NR_039646	MIR4444-1	NR_039646	ENSG00000284252	71.5916	-0.631379	0.0801715	71.4421	-0.298054	NA	59.0889	-0.848619	0.0609934	54.2379	-0.65444	0.105395	51.7821	-1.37757	0.00169625	47.3601	-1.15175	0.00909436
POLD4_NM_001256870	POLD4	NM_001256870	ENSG00000175482	50.506	-0.470986	NA	72.1135	-0.303284	NA	36.3071	-1.1215	0.0262229	50.3819	-0.934444	0.0286984	32.8481	-1.63916	0.00170371	46.4597	-1.2612	0.00461767
CNPPD1_NM_015680	CNPPD1	NM_015680	ENSG00000115649	100.729	-0.791892	0.0322803	38.7756	-0.258664	NA	82.6108	-1.05199	0.00783325	28.3521	-0.721209	NA	80.0725	-1.1573	0.00170371	32.689	-0.308422	0.549561
NRD1_NM_001101662	NRD1	NM_001101662	ENSG00000078618	61.1872	-0.506662	NA	50.3558	0.116133	NA	50.2508	-0.722425	0.115424	36.7355	-0.221605	NA	41.7063	-1.45974	0.00170748	30.6148	-0.748173	0.152064
ENKD1_NM_032140	ENKD1	NM_032140	ENSG00000124074	74.8975	-0.420708	0.180343	25.5961	0.059028	NA	57.2746	-0.843636	0.0665888	19.7685	-0.105658	NA	49.7207	-1.40432	0.00170819	20.8663	0.0525592	NA
EIF5A_NM_001143762	EIF5A	NM_001143762	ENSG00000132507	44.7073	-0.363226	NA	74.8934	-0.43502	NA	30.5814	-1.16097	0.0256556	55.5254	-0.911711	0.0286071	27.1831	-1.71422	0.00170819	54.4596	-0.976185	0.0204903
UBAC2_NM_001144072	UBAC2	NM_001144072	ENSG00000134882	68.9225	-0.344133	0.249928	74.6914	-0.135815	NA	49.5673	-0.97155	0.0349757	56.6967	-0.465283	0.243486	44.5346	-1.42335	0.00171241	51.1759	-0.787933	0.0700556
KLF7_NR_073108	KLF7	NR_073108	N/A	83.0315	-0.453118	0.145057	50.5372	-0.460138	NA	60.7266	-1.05495	0.0138473	37.0029	-0.989304	NA	57.2454	-1.29159	0.00171241	34.5085	-1.27838	0.0102417
ZC3H3_NM_015117	ZC3H3	NM_015117	ENSG00000014164	93.9767	-0.652716	0.0612912	49.7606	-0.110675	NA	71.2289	-1.1878	0.00395781	45.3069	0.0635252	0.876675	70.5891	-1.22043	0.00171241	36.8726	-0.47196	0.336845
BCAS2_NM_005872	BCAS2	NM_005872	ENSG00000116752	59.7684	-0.576342	NA	18.4829	0.194804	NA	45.8923	-1.05305	0.0242603	14.0463	0.0677892	NA	41.7473	-1.46051	0.00171444	15.3201	0.238313	NA
LDLR_NM_000527	LDLR	NM_000527	ENSG00000130164	92.9933	-0.586174	0.0880811	122.411	-0.399892	0.177504	80.249	-0.630159	0.122596	89.9001	-0.903891	0.0135631	67.3525	-1.28324	0.00172565	84.2313	-1.14364	0.00136331
C1orf74_NM_152485	C1orf74	NM_152485	ENSG00000162757	64.7002	-0.540913	NA	18.1121	0.287874	NA	51.0399	-0.908403	0.0459897	17.2234	0.563054	NA	44.9332	-1.4512	0.00173491	17.7082	0.692558	NA
FOXM1_NM_001243088	FOXM1	NM_001243088	ENSG00000111206	97.0295	-0.486753	0.114708	77.0634	-0.345128	0.275807	77.1614	-0.79233	0.046341	63.8056	-0.436998	0.255995	68.522	-1.22562	0.00173491	54.5578	-0.964788	0.0270402
ZNF217_NM_006526	ZNF217	NM_006526	ENSG00000171940	60.043	-0.501518	NA	180.103	-0.365958	0.196203	41.8424	-1.37733	0.00598545	130.833	-0.903345	0.0128417	40.5989	-1.53469	0.00173491	114.067	-1.52085	7.52387e-06
SMIM11A_NM_058182	SMIM11A	NM_058182	ENSG00000205670	56.7098	-0.59647	NA	38.8623	-0.216369	NA	43.8646	-1.04286	0.0271985	25.0722	-1.04448	NA	39.5746	-1.47885	0.00177601	27.548	-0.727525	0.181655
SMIM11B_NM_001313692	SMIM11B	NM_001313692	ENSG00000273590	56.4952	-0.607547	NA	39.289	-0.21414	NA	43.3355	-1.09002	0.0222656	25.5925	-1.00914	NA	39.5746	-1.47885	0.00177601	27.3587	-0.778304	0.156
NEAT1_NR_028272	NEAT1	NR_028272	N/A	117.508	-0.549904	0.0783577	85.2133	-0.0583689	0.833068	93.0481	-0.884034	0.0192568	72.4692	-0.0332348	0.927797	86.8954	-1.14181	0.00177715	69.5342	-0.0975733	0.818612
FOXN3_NM_005197	FOXN3	NM_005197	ENSG00000053254	81.6538	-0.581709	0.0931564	48.7433	-0.0802734	NA	61.1393	-1.14446	0.00756604	37.1669	-0.367476	NA	59.0396	-1.27877	0.00178146	32.9208	-0.735799	0.167649
RAB4A_NM_001271998	RAB4A	NM_001271998	ENSG00000168118	62.2109	-0.51304	NA	41.1284	-0.133697	NA	44.9747	-1.20277	0.0133243	33.0077	-0.276291	NA	42.8122	-1.43763	0.00179629	29.8794	-0.521665	0.326154
ZBTB47_NM_145166	ZBTB47	NM_145166	ENSG00000114853	57.1271	-0.391474	NA	46.0797	-0.286621	NA	46.4747	-0.617318	0.172901	34.3954	-0.68082	NA	36.3055	-1.56298	0.00182385	31.0102	-1.0431	0.0433745
MIR4425_NR_039623	MIR4425	NR_039623	ENSG00000264371	72.2527	-0.527389	0.115527	65.4357	-0.494939	NA	55.6342	-0.951844	0.03019	51.645	-0.754297	0.0702895	50.5519	-1.34609	0.00183926	46.5692	-1.13349	0.0123122
COPS5_NM_006837	COPS5	NM_006837	ENSG00000121022	92.567	-0.435412	0.154769	84.4557	-0.497213	0.13943	75.4535	-0.663197	0.110969	69.6918	-0.615681	0.102849	63.9181	-1.28787	0.00183926	58.0668	-1.32105	0.00131058
NKIRAS1_NM_020345	NKIRAS1	NM_020345	ENSG00000197885	62.1772	-0.676204	NA	31.3205	0.211256	NA	51.2742	-0.89209	0.0488457	26.3099	0.221665	NA	44.7926	-1.43914	0.00186013	22.3875	-0.0839619	NA
UTP23_NM_032334	UTP23	NM_032334	ENSG00000147679	89.3529	-0.386916	0.195013	50.1908	0.178373	NA	75.6202	-0.475136	0.255402	36.7757	-0.127392	NA	60.113	-1.32273	0.00186013	32.9292	-0.389142	0.448486
RPS6KC1_NM_001136138	RPS6KC1	NM_001136138	ENSG00000136643	78.2041	-0.570141	0.0992919	30.0463	-0.252515	NA	55.2433	-1.39271	0.0018443	28.5215	-0.0206348	NA	55.8932	-1.31569	0.00188424	23.2216	-0.508989	NA
C19orf60_NM_001100418	C19orf60	NM_001100418	ENSG00000006015	80.0859	-0.616079	0.075415	72.297	-0.656471	NA	66.7534	-0.77991	0.0592041	61.3986	-0.702778	0.0779636	58.7624	-1.26681	0.00188424	58.03	-0.856768	0.053892
PDE7A_NM_001242318	PDE7A	NM_001242318	ENSG00000205268	127.52	-0.372137	0.164275	147.056	-0.318212	0.253658	101.882	-0.63316	0.0975347	108.411	-0.781311	0.0366513	89.5527	-1.09581	0.00192892	98.7633	-1.12603	0.00134913
TGIF1_NM_170695	TGIF1	NM_170695	ENSG00000177426	107.535	-0.468631	0.116437	58.7333	-0.268614	NA	81.7697	-0.935398	0.0169636	52.0877	-0.184575	0.643132	77.0908	-1.14594	0.00194222	45.6179	-0.551507	0.225095
RBM3_NM_006743	RBM3	NM_006743	ENSG00000102317	52.8755	-0.131154	NA	39.8069	-0.711779	NA	33.4847	-1.09557	0.0351318	29.7754	-1.26078	NA	29.8069	-1.62886	0.00194222	26.8239	-1.84738	NA
HVCN1_NM_001040107	HVCN1	NM_001040107	ENSG00000122986	85.1378	-0.624654	0.0801715	63.7199	-0.485452	NA	65.2045	-1.10835	0.00923535	42.8532	-1.35866	0.00294209	62.8228	-1.25056	0.00195427	43.4667	-1.31043	0.00459966
AXL_NM_001278599	AXL	NM_001278599	ENSG00000167601	89.4961	-0.640554	0.065296	51.0065	-0.337582	NA	65.3834	-1.28498	0.0045187	38.6066	-0.709076	NA	67.0132	-1.20834	0.00197612	40.7767	-0.516322	0.281301
MIR4645_NR_039788	MIR4645	NR_039788	ENSG00000266750	60.2028	-0.0692451	NA	22.7845	0.111689	NA	44.8318	-0.458466	0.313965	16.5172	-0.164556	NA	33.5674	-1.55956	0.00198147	16.3124	-0.173997	NA
MIR191_NR_029690	MIR191	NR_029690	ENSG00000207605	94.2626	-0.371931	0.19035	116.59	-0.244651	0.373071	66.6013	-1.10044	0.00823701	81.9988	-0.858167	0.0262936	63.0383	-1.28485	0.00199232	80.7907	-0.893619	0.0167793
BCL7C_NM_001286526	BCL7C	NM_001286526	ENSG00000099385	70.3075	-0.462489	0.149464	49.3897	-0.235999	NA	56.3602	-0.710562	0.113315	38.5909	-0.480049	NA	47.7444	-1.3713	0.00199825	35.1465	-0.749281	0.133508
LINC01573_NR_121577	LINC01573	NR_121577	N/A	80.7897	-0.61851	0.0753713	70.9765	-0.591912	NA	59.5768	-1.23614	0.00507363	54.9895	-0.932316	0.0266373	58.5792	-1.29595	0.00200879	49.5097	-1.36149	0.00201487
ADNP-AS1_NR_110007	ADNP-AS1	NR_110007	ENSG00000259456	62.5459	-0.445912	NA	67.2442	-0.273449	NA	51.0361	-0.670021	0.130611	45.3629	-1.0224	0.0224153	41.8504	-1.43405	0.00200983	47.5814	-0.85176	0.0561807
NME3_NM_002513	NME3	NM_002513	ENSG00000103024	76.2363	-0.542392	0.107485	44.6547	-0.194832	NA	56.114	-1.17743	0.00742678	31.5547	-0.70502	NA	54.437	-1.2996	0.00201833	35.1405	-0.381562	0.445441
PHLDA2_NM_003311	PHLDA2	NM_003311	ENSG00000181649	76.153	-0.544337	0.106641	55.338	-0.174094	NA	53.3887	-1.36022	0.00298926	42.0918	-0.481512	0.25563	54.1999	-1.3086	0.0020295	38.5569	-0.743508	0.122476
DICER1_NM_177438	DICER1	NM_177438	ENSG00000100697	62.4222	-0.481559	NA	50.7782	-0.0697978	NA	47.1464	-0.981721	0.0361577	35.7673	-0.569271	NA	42.1786	-1.44189	0.00203914	37.5954	-0.413673	0.394452
LCP2_NM_005565	LCP2	NM_005565	ENSG00000043462	64.7039	-0.301965	NA	133.752	-0.331308	0.261162	49.0762	-0.720515	0.126049	98.8678	-0.789349	0.0291915	40.4774	-1.47333	0.00203914	84.7342	-1.4316	6.90652e-05
WAS_NM_000377	WAS	NM_000377	ENSG00000015285	48.3734	-0.403237	NA	37.2917	-0.318941	NA	35.5496	-0.968885	0.0510395	26.5589	-0.850302	NA	30.8416	-1.5999	0.00204852	27.242	-0.793933	0.144242
EME2_NM_001257370	EME2	NM_001257370	ENSG00000197774	67.2594	-0.640988	NA	34.1363	-0.136167	NA	50.9383	-1.21196	0.00913885	31.9957	0.0827352	NA	49.711	-1.34296	0.00205613	25.7324	-0.452392	NA
APOC1_NM_001645	APOC1	NM_001645	ENSG00000130208	73.445	-0.39365	0.204276	62.8015	-0.416805	NA	52.0956	-1.08068	0.0170238	43.2466	-1.1432	0.0132721	48.5853	-1.37104	0.00205613	41.297	-1.33735	0.00644723
TTLL3_NM_001025930	TTLL3	NM_001025930	ENSG00000214021	66.7859	-0.533613	NA	54.4574	-0.309954	NA	52.3824	-0.918586	0.0388254	38.5282	-0.883094	NA	46.8625	-1.36926	0.00205613	33.9145	-1.38347	0.00644723
KBTBD2_NM_015483	KBTBD2	NM_015483	ENSG00000170852	80.8975	-0.510198	0.115527	63.7071	0.0629712	NA	62.4926	-0.937424	0.0282566	50.6541	-0.0720397	0.85648	57.3989	-1.27331	0.00205613	42.4803	-0.553583	0.238982
PPCS_NM_001077447	PPCS	NM_001077447	ENSG00000127125	76.9384	-0.563615	0.0992919	75.8744	-0.535074	0.138458	63.1269	-0.781849	0.0690235	61.1881	-0.738291	0.0615203	54.4896	-1.32967	0.00206135	53.2829	-1.25836	0.00304553
ANKRD28_NM_001195098	ANKRD28	NM_001195098	ENSG00000206560	63.6577	-0.287104	NA	99.8834	-0.540384	0.13381	46.6135	-0.843659	0.0874117	93.5928	-0.2825	0.448671	39.4208	-1.54431	0.00207936	71.335	-1.22853	0.00301265
TPRA1_NM_001136053	TPRA1	NM_001136053	ENSG00000163870	67.3737	-0.523324	NA	42.1957	-0.31516	NA	50.404	-1.0682	0.0177927	30.0462	-0.849597	NA	46.7705	-1.37304	0.00208029	30.2637	-0.838192	0.114878
RPL28_NM_000991	RPL28	NM_000991	ENSG00000108107	74.5591	-0.668074	0.065296	70.0904	0.0516316	NA	57.9227	-1.11139	0.0105572	54.9905	-0.116349	0.768435	55.0327	-1.30533	0.00208426	54.9941	-0.101036	0.819311
TTC32_NM_001008237	TTC32	NM_001008237	ENSG00000183891	82.3777	-0.509713	0.117564	64.1074	-0.403547	NA	70.7573	-0.56952	0.19336	52.4872	-0.539801	0.198637	58.2088	-1.29723	0.00208426	44.0593	-1.16701	0.0104926
POLR2M_NM_001018102	POLR2M	NM_001018102	ENSG00000255529	42.2422	-0.54673	NA	53.0439	-0.445547	NA	34.0119	-0.85509	0.0909541	39.9652	-0.859748	0.0544752	28.3094	-1.6486	0.00212758	37.9908	-1.0527	0.0282998
PFKP_NM_001242339	PFKP	NM_001242339	ENSG00000067057	75.0239	-0.498714	0.122312	59.6979	-0.294617	NA	50.5058	-1.48319	0.00148736	46.8996	-0.524289	0.207049	52.4902	-1.31128	0.00213803	43.4512	-0.780386	0.0908109
LOC102724050_NR_120488	LOC102724050	NR_120488	ENSG00000258137	81.3446	-0.843889	0.0318623	56.0975	-0.213681	NA	67.8689	-1.03619	0.0123021	39.2536	-0.775579	0.0817883	63.0896	-1.2907	0.00213938	39.245	-0.75012	0.131769
UBALD1_NM_145253	UBALD1	NM_145253	ENSG00000153443	73.1099	-0.646552	0.0753713	43.3879	-0.403433	NA	54.0271	-1.29773	0.00395781	34.3682	-0.663211	NA	53.665	-1.335	0.00216564	31.5153	-0.972783	0.0583608
CMTM3_NM_144601	CMTM3	NM_144601	ENSG00000140931	61.1293	-0.491599	NA	53.5106	-0.196146	NA	43.5522	-1.21504	0.0102419	40.3629	-0.508346	0.244655	41.654	-1.43135	0.00217604	33.4884	-1.1719	0.019652
DUSP3_NM_004090	DUSP3	NM_004090	ENSG00000108861	94.9935	-0.441329	0.142579	52.6937	-0.0926805	NA	65.8072	-1.27663	0.00234283	35.3665	-0.738357	NA	65.2528	-1.26105	0.00217706	34.9405	-0.769219	0.122761
ZNF236_NM_007345	ZNF236	NM_007345	ENSG00000130856	81.2272	-0.452626	0.141178	44.0425	-0.307556	NA	65.665	-0.692738	0.120932	37.098	-0.357361	NA	56.466	-1.27379	0.00218153	35.7217	-0.454816	0.361919
SLC35C1_NM_018389	SLC35C1	NM_018389	ENSG00000181830	51.2452	-0.636454	NA	35.5607	-0.285944	NA	42.9107	-0.803905	0.0858792	24.885	-0.871033	NA	35.7417	-1.53177	0.00219303	25.2303	-0.855725	NA
SLC22A4_NM_003059	SLC22A4	NM_003059	ENSG00000197208	67.6853	-0.733348	NA	66.472	-0.438043	NA	51.9614	-1.24071	0.00604908	45.7455	-1.17397	0.0090765	51.044	-1.32146	0.00219303	47.8225	-1.03799	0.0195004
LBHD1_NM_024099	LBHD1	NM_024099	ENSG00000162194	81.9838	-0.192002	0.477981	78.0327	-0.208848	0.469224	60.2092	-0.689307	0.106534	60.4459	-0.469797	0.226212	50.9427	-1.3286	0.00221076	52.2517	-0.956948	0.0270918
BMP2K_NM_017593	BMP2K	NM_017593	ENSG00000138756	86.2293	-0.305457	0.272044	38.7655	-0.0360746	NA	65.4426	-0.730629	0.0788736	30.4703	-0.220957	NA	56.8354	-1.2644	0.0022115	27.8499	-0.439281	0.425883
RPL12_NM_000976	RPL12	NM_000976	ENSG00000197958	50.262	-0.486756	NA	68.4294	-0.368608	NA	42.3463	-0.619199	0.184242	53.4598	-0.624765	0.128674	33.0361	-1.5694	0.00222075	50.8299	-0.781884	0.0793082
IRAK1_NM_001025242	IRAK1	NM_001025242	ENSG00000184216	65.0058	-0.819089	NA	86.3821	-0.223777	0.428457	51.159	-1.26662	0.00751446	57.6899	-1.00528	0.0158091	50.0513	-1.34521	0.00223349	50.1946	-1.62078	0.000182124
GMEB1_NM_006582	GMEB1	NM_006582	ENSG00000162419	72.0963	-0.503874	0.13069	84.2298	-0.496624	0.139646	52.2461	-1.17972	0.0104506	65.3665	-0.817846	0.0443967	50.0801	-1.36854	0.00224851	57.3821	-1.34274	0.00101245
ZNF131_NR_123719	ZNF131	NR_123719	ENSG00000172262	65.5998	-0.628766	NA	48.5329	-0.465416	NA	47.9395	-1.3304	0.00421102	37.9634	-0.750454	NA	47.5387	-1.37056	0.00225066	37.8765	-0.758585	0.119996
UBXN11_NM_145345	UBXN11	NM_145345	ENSG00000158062	60.8592	-0.678096	NA	84.5843	-0.552435	0.12221	50.5477	-0.866131	0.0582952	63.0132	-1.03527	0.0104589	44.5348	-1.3942	0.00225372	60.2357	-1.24508	0.00239104
ZNF106_NM_001284307	ZNF106	NM_001284307	ENSG00000103994	74.2715	-0.462089	0.142579	37.4841	-0.307235	NA	60.8317	-0.665117	0.116232	30.513	-0.455656	NA	50.359	-1.36634	0.00226	28.8182	-0.638215	0.230197
MEIS1-AS2_NR_046625	MEIS1-AS2	NR_046625	ENSG00000230749	116.332	-0.522377	0.108537	158.894	-0.350815	0.204238	87.1704	-1.05836	0.013912	116.618	-0.843378	0.0145657	84.0792	-1.21036	0.00229572	113.312	-0.943077	0.00498084
G3BP1_NM_005754	G3BP1	NM_005754	ENSG00000145907	63.6644	-0.755412	NA	45.3872	-0.211235	NA	52.7364	-0.982074	0.0309062	36.1085	-0.398194	NA	47.7553	-1.37318	0.00233284	34.4051	-0.48736	0.359793
SPNS3_NM_182538	SPNS3	NM_182538	ENSG00000182557	65.131	-0.596078	NA	73.6775	-0.65084	NA	55.4328	-0.686629	0.115965	56.86	-1.02287	0.0142379	46.728	-1.36489	0.0023617	46.445	-2.06406	4.40832e-06
S100A2_NM_005978	S100A2	NM_005978	ENSG00000196754	68.8238	-0.683106	0.0656974	46.1848	-0.567129	NA	51.7819	-1.26191	0.00533506	37.4222	-0.779306	NA	50.8803	-1.32866	0.00240371	33.1505	-1.24561	0.0135505
RUFY1_NM_025158	RUFY1	NM_025158	ENSG00000176783	72.4226	-0.354056	0.242172	52.6954	-0.0699086	NA	55.933	-0.746068	0.0939454	41.8423	-0.238989	0.568263	47.5189	-1.38117	0.00240371	35.1714	-0.743894	0.133947
TRIM52_NM_032765	TRIM52	NM_032765	ENSG00000183718	76.2803	-0.531324	0.107996	30.5982	-0.155139	NA	60.2829	-0.878384	0.0403186	28.4566	0.046133	NA	53.9363	-1.29913	0.00240371	25.5559	-0.190296	NA
ACBD3_NM_022735	ACBD3	NM_022735	ENSG00000182827	53.178	-0.619789	NA	29.0958	-0.142456	NA	42.9044	-0.919893	0.0512618	25.4737	-0.0931965	NA	37.3105	-1.49332	0.00240503	22.3951	-0.404342	NA
SEC14L1_NM_001204408	SEC14L1	NM_001204408	ENSG00000129657	62.5014	-0.636096	NA	64.2806	-0.558165	NA	47.0583	-1.17426	0.0134525	50.5224	-0.856281	0.0446445	44.9058	-1.38924	0.00242973	46.2093	-1.23927	0.00630209
MADD_NM_001135943	MADD	NM_001135943	ENSG00000110514	77.2689	-0.35262	0.236762	29.565	-0.329312	NA	58.3717	-0.818583	0.0667538	24.2737	-0.477233	NA	50.785	-1.38759	0.00243668	22.6104	-0.69369	NA
CLHC1_NM_152385	CLHC1	NM_152385	ENSG00000162994	63.0548	-0.53155	NA	39.9507	-0.302322	NA	46.4346	-1.13677	0.0158747	35.9188	-0.174339	NA	43.5936	-1.41306	0.00243668	27.5817	-0.971416	0.0699067
ITGA7_NM_001144996	ITGA7	NM_001144996	ENSG00000135424	44.6049	-0.487063	NA	41.9587	-0.0517951	NA	35.4958	-0.779873	0.117973	28.5353	-0.595659	NA	28.6084	-1.66097	0.00245591	26.2303	-0.876983	NA
TGIF2-C20orf24_NM_001199535	TGIF2-C20orf24	NM_001199535	ENSG00000259399	65.057	-0.239516	NA	70.4857	-0.327846	NA	44.5295	-0.989441	0.0351318	51.348	-0.788257	0.066236	38.889	-1.52974	0.0024798	46.9817	-1.12262	0.0143101
RPL34-AS1_NR_026968	RPL34-AS1	NR_026968	ENSG00000234492	66.7185	-0.549609	NA	37.651	-0.161651	NA	51.129	-1.03723	0.0221413	30.0838	-0.332925	NA	47.4164	-1.34282	0.0024798	27.8353	-0.536471	0.318363
COX20_NM_001312872	COX20	NM_001312872	ENSG00000203667	97.7573	-0.480486	0.121812	45.9236	-0.0769325	NA	79.1968	-0.707623	0.10056	36.5823	-0.239468	NA	69.8509	-1.18913	0.00248005	36.4456	-0.239746	0.638078
ZNF207_NM_001032293	ZNF207	NM_001032293	ENSG00000010244	89.6327	-0.385053	0.192862	107.11	-0.424303	0.180865	67.6968	-0.853487	0.0444878	90.9675	-0.439549	0.214082	61.0078	-1.25996	0.00248005	81.1463	-0.801201	0.0331158
RNF6_NM_183043	RNF6	NM_183043	ENSG00000127870	77.9462	-0.484637	0.129345	33.0774	-0.069392	NA	59.517	-0.956028	0.0270694	30.4908	0.10469	NA	54.7937	-1.2935	0.00248855	23.2314	-0.557001	NA
OSGEP_NM_017807	OSGEP	NM_017807	ENSG00000092094	90.9291	-0.422743	0.149499	42.9657	-0.392258	NA	68.8483	-0.890606	0.0297759	36.9158	-0.412362	NA	60.9986	-1.32611	0.00248855	32.9391	-0.749717	0.140044
AP2A1_NM_014203	AP2A1	NM_014203	ENSG00000196961	65.7227	-0.509783	NA	45.8384	-0.208145	NA	47.2667	-1.21188	0.00923713	37.9903	-0.276599	NA	45.6021	-1.35834	0.00248855	40.1723	-0.106858	0.830859
LINC00659_NR_046224	LINC00659	NR_046224	N/A	52.4367	-0.557376	NA	60.1614	-0.55075	NA	39.8575	-1.02969	0.0389773	47.9711	-0.802846	0.0615034	35.8228	-1.51567	0.00249297	43.1591	-1.18729	0.0113291
ZNF143_NM_001282656	ZNF143	NM_001282656	ENSG00000166478	100.168	-0.492105	0.112327	73.9265	-0.301695	NA	82.5668	-0.682974	0.0933067	61.7007	-0.371754	0.349162	72.3666	-1.15607	0.00250071	58.0283	-0.545445	0.217663
PRR30_NM_178553	PRR30	NM_178553	ENSG00000186143	55.5225	-0.602115	NA	92.7689	-0.827387	0.0389056	39.4279	-1.41492	0.0046835	68.1047	-1.48213	0.000241901	39.3797	-1.43892	0.00250739	63.9825	-1.85501	3.86719e-06
HNRNPF_NM_001098206	HNRNPF	NM_001098206	ENSG00000169813	73.6227	-0.669149	0.0656974	71.7218	-0.048186	NA	57.2023	-1.11242	0.0110458	50.2068	-0.577362	0.170518	54.6121	-1.28587	0.00252293	46.9313	-0.783754	0.0912608
USF1_NM_001276373	USF1	NM_001276373	ENSG00000158773	82.065	-0.328642	0.25253	30.4789	0.0253139	NA	68.9396	-0.425698	0.287853	26.2948	0.0913322	NA	54.3123	-1.28745	0.00252374	24.7718	-0.0220085	NA
PYCR2_NM_001271681	PYCR2	NM_001271681	ENSG00000143811	55.3339	-0.469737	NA	52.6008	-0.289071	NA	39.1784	-1.20174	0.0139278	44.6636	-0.3156	0.450735	37.1138	-1.47592	0.00252374	37.1069	-0.893214	0.0711609
TOR4A_NM_017723	TOR4A	NM_017723	ENSG00000198113	81.1557	-0.488606	0.127544	58.7857	-0.293861	NA	57.6797	-1.25114	0.00421935	42.1395	-0.836665	0.0575687	57.4516	-1.2561	0.00253237	45.465	-0.574661	0.207048
BMF_NM_001003942	BMF	NM_001003942	ENSG00000104081	69.664	-0.176206	0.539809	105.73	-0.653034	0.0726801	49.3555	-0.773675	0.0849467	77.0808	-1.27105	0.000974656	42.1582	-1.3962	0.00254022	73.9298	-1.49082	7.52238e-05
ZNF460_NM_006635	ZNF460	NM_006635	ENSG00000197714	81.0872	-0.440163	0.147195	68.0143	-0.238525	NA	57.8841	-1.15234	0.00955128	54.986	-0.401665	0.314757	56.1297	-1.25982	0.00254022	50.5521	-0.616479	0.170514
THOC5_NM_001002878	THOC5	NM_001002878	ENSG00000100296	50.2599	-0.444076	NA	20.9055	-0.192839	NA	39.1509	-0.857151	0.0787725	19.6087	-0.0279209	NA	33.3635	-1.53906	0.00254022	15.682	-0.536036	NA
ANXA4_NM_001153	ANXA4	NM_001153	ENSG00000196975	64.7904	-0.405877	NA	53.4822	-0.279884	NA	47.587	-0.9773	0.0387193	42.0597	-0.52346	0.220538	42.4051	-1.43184	0.00255259	35.9369	-1.05462	0.0320156
LYRM1_NR_126527	LYRM1	NR_126527	N/A	54.834	-0.469086	NA	84.9723	-0.506197	0.13943	38.2429	-1.27208	0.0104316	62.1153	-1.0419	0.0105692	36.5709	-1.48424	0.002561	55.3433	-1.5574	0.000210732
RNF6_NM_005977	RNF6	NM_005977	ENSG00000127870	71.8115	-0.398076	0.192856	55.3824	-0.450329	NA	56.8636	-0.706429	0.110096	46.6304	-0.519675	0.217603	48.1521	-1.35866	0.00256959	40.8404	-0.967005	0.0416022
NOTCH1_NM_017617	NOTCH1	NM_017617	ENSG00000148400	68.7296	-0.32765	NA	58.0177	-0.178299	NA	49.5747	-0.938806	0.0386421	44.2859	-0.471114	0.260914	43.5319	-1.44237	0.00256959	42.1499	-0.622616	0.181163
POLR3G_NM_006467	POLR3G	NM_006467	ENSG00000113356	52.9779	-0.655738	NA	21.7213	-0.0111911	NA	40.2473	-1.20588	0.0139363	19.549	0.0829201	NA	37.935	-1.46092	0.00257013	18.0429	-0.0359244	NA
ITPA_NM_181493	ITPA	NM_181493	ENSG00000125877	70.5137	-0.557751	0.105976	75.0558	-0.643812	0.0924988	56.1763	-0.889781	0.0449974	55.7117	-1.20659	0.00385527	50.5529	-1.30235	0.00257041	55.2771	-1.25931	0.00283884
LRRC8D_NM_018103	LRRC8D	NM_018103	ENSG00000171492	102.659	-0.222386	0.393811	98.3687	-0.179588	0.505025	68.4963	-1.09231	0.00822079	73.2288	-0.551492	0.140499	66.953	-1.17378	0.00257924	62.9002	-1.11285	0.00530904
MIR193A_NR_029710	MIR193A	NR_029710	ENSG00000207614	62.1087	-0.267358	NA	66.5956	-0.268176	NA	42.2491	-1.0742	0.0235476	51.0108	-0.570844	0.16433	38.6634	-1.44606	0.00258552	43.7965	-1.09352	0.0188291
TPRKB_NM_016058	TPRKB	NM_016058	ENSG00000144034	57.6979	-0.417419	NA	31.8812	-0.186464	NA	43.646	-0.897104	0.0710358	28.0642	-0.145342	NA	38.0476	-1.48054	0.00258552	27.1923	-0.211029	NA
TARP_NM_001003799	TARP	NM_001003799	N/A	226.848	-0.0448254	0.845827	205.461	-0.102469	0.750957	169.015	-0.473813	0.188646	163.462	-0.255118	0.601743	144.583	-0.995612	0.00258552	135.974	-0.908295	0.00938351
CHD9_NM_025134	CHD9	NM_025134	ENSG00000177200	64.7014	-0.699601	NA	55.2039	-0.358274	NA	50.1678	-1.16077	0.0147323	45.4853	-0.487752	0.245938	48.073	-1.33676	0.00259699	41.8348	-0.749016	0.114076
C9orf89_NM_032310	C9orf89	NM_032310	ENSG00000165233	48.222	-0.401644	NA	45.0595	-0.0713424	NA	37.9846	-0.738604	0.127854	42.2676	0.167988	0.696377	30.9447	-1.55984	0.00259712	35.9785	-0.168122	0.755616
TMEM183A_NM_138391	TMEM183A	NM_138391	ENSG00000163444	59.6592	-0.638791	NA	35.3069	-0.257095	NA	43.7048	-1.32383	0.00639846	31.7193	-0.136354	NA	43.1218	-1.38359	0.00259736	27.3336	-0.545445	0.314109
TMEM183B_NM_001079809	TMEM183B	NM_001079809	N/A	59.6592	-0.638791	NA	35.884	-0.253023	NA	43.7048	-1.32383	0.00639846	31.9488	-0.151232	NA	43.1218	-1.38359	0.00259736	27.5608	-0.561625	0.298009
BCL2L1_NM_001191	BCL2L1	NM_001191	ENSG00000171552	85.9407	-0.231974	0.391885	40.595	-0.23076	NA	59.5802	-0.958876	0.0266394	34.9616	-0.197917	NA	55.1847	-1.26316	0.0025981	29.9162	-0.64829	0.219801
ANKRD40_NM_052855	ANKRD40	NM_052855	ENSG00000154945	80.0113	-0.374704	0.231633	58.9528	-0.663007	NA	67.5111	-0.39263	0.501333	47.5472	-0.896905	0.0370691	52.6741	-1.39434	0.00261493	49.1748	-0.782943	0.0759151
IGFBP7_NM_001253835	IGFBP7	NM_001253835	ENSG00000163453	99.5397	-0.578476	0.0801715	78.6577	-0.488252	0.151009	78.2111	-0.957021	0.0182148	59.846	-0.883892	0.0296485	74.0879	-1.15721	0.00263885	61.5663	-0.794734	0.0556094
ARID1A_NM_006015	ARID1A	NM_006015	ENSG00000117713	144.075	-0.362357	0.159437	91.9772	-0.187732	0.490152	112.277	-0.710737	0.0502751	65.0073	-0.752854	0.0537027	101.623	-1.04164	0.0026425	60.2059	-1.02263	0.0120567
SMAD2_NM_001003652	SMAD2	NM_001003652	ENSG00000175387	66.0615	-0.384176	NA	55.2111	-0.277909	NA	51.2219	-0.762309	0.0867201	40.2921	-0.759998	0.0893943	43.8594	-1.36733	0.00265218	40.9466	-0.714528	0.133073
ZNF700_NM_001271848	ZNF700	NM_001271848	ENSG00000196757	63.2404	-0.47742	NA	80.7479	-0.214974	0.456524	51.2854	-0.732292	0.109605	61.4694	-0.540994	0.171068	43.3459	-1.39991	0.00265218	64.3062	-0.392562	0.353401
SMG7-AS1_NR_040063	SMG7-AS1	NR_040063	ENSG00000232860	51.293	-0.523	NA	84.245	-0.423448	0.19164	41.3524	-0.786275	0.102124	63.6364	-0.828606	0.0373438	34.7363	-1.50748	0.00265852	56.4363	-1.29353	0.00175327
KRCC1_NM_001304526	KRCC1	NM_001304526	ENSG00000172086	47.8381	-0.494362	NA	74.4247	-0.211251	NA	33.8165	-1.23948	0.0185992	60.1999	-0.354346	0.356141	31.6833	-1.54891	0.00265878	50.9565	-0.875962	0.046252
FEM1B_NM_015322	FEM1B	NM_015322	ENSG00000169018	77.4652	-0.385025	0.195013	50.3547	-0.266424	NA	53.1642	-1.23017	0.00572649	41.3331	-0.374564	0.38753	52.4183	-1.28438	0.0026613	39.8886	-0.474133	0.332501
LPAR5_NM_001142961	LPAR5	NM_001142961	ENSG00000184574	70.1578	-0.761136	0.0581549	66.3245	-0.471868	NA	56.9788	-1.05667	0.0158024	53.4537	-0.660279	0.102909	53.5572	-1.29399	0.00266668	48.0516	-1.01444	0.0251403
ANAPC7_NM_001137664	ANAPC7	NM_001137664	ENSG00000196510	64.0584	-0.515799	NA	61.3256	-0.235487	NA	54.3087	-0.632641	0.158809	45.6539	-0.622117	0.141583	44.7721	-1.36129	0.0026729	44.8283	-0.678299	0.139741
EIF4G2_NM_001172705	EIF4G2	NM_001172705	ENSG00000110321	77.5894	-0.566376	0.0974022	59.2853	-0.144067	NA	63.059	-0.816843	0.0517791	46.1979	-0.372194	0.365955	55.9047	-1.26466	0.00269926	42.8461	-0.6027	0.194168
CGREF1_NM_001166239	CGREF1	NM_001166239	ENSG00000138028	59.5775	-0.862748	NA	79.9791	-0.709656	0.0753638	48.5139	-1.18919	0.0100203	62.3712	-1.10221	0.00750151	46.935	-1.3339	0.00270615	55.6804	-1.66124	8.92628e-05
ZMYND12_NM_001146192	ZMYND12	NM_001146192	ENSG00000066185	85.2784	-0.542823	0.105175	66.7979	-0.436879	NA	66.7165	-0.920704	0.0297611	54.7203	-0.584335	0.144721	60.4867	-1.27046	0.00271084	45.7827	-1.2299	0.00608974
C1orf228_NM_001145636	C1orf228	NM_001145636	ENSG00000198520	61.2182	-0.809295	NA	85.714	-0.447482	0.180026	49.8333	-1.11633	0.0139924	63.6183	-0.913072	0.0223467	46.9556	-1.34906	0.00271767	55.964	-1.4541	0.000436384
RPLP2_NM_001004	RPLP2	NM_001004	ENSG00000177600	70.1609	-0.566261	0.106641	46.866	0.0411665	NA	55.1036	-0.944108	0.0358039	34.2363	-0.29988	NA	50.1197	-1.33594	0.00272698	33.2768	-0.357147	0.48292
MGME1_NM_001310338	MGME1	NM_001310338	ENSG00000125871	108.221	-0.257271	0.318964	87.4732	-0.30548	0.312233	72.7735	-1.12215	0.00553279	73.202	-0.352469	0.329152	71.7413	-1.14759	0.00272698	59.7137	-1.04769	0.0111798
POLE3_NM_001278255	POLE3	NM_001278255	ENSG00000148229	60.6141	-0.535021	NA	65.3535	-0.479029	NA	45.943	-1.03849	0.029146	50.8359	-0.784027	0.0628432	42.1071	-1.4223	0.00272698	48.36	-0.989859	0.0252347
PKMYT1_NM_001258450	PKMYT1	NM_001258450	ENSG00000127564	64.7916	-0.482784	NA	30.4165	0.0211383	NA	53.4654	-0.673834	0.130599	20.8614	-0.441201	NA	44.741	-1.35334	0.00275719	25.3733	0.0283493	NA
MIR4734_NR_039887	MIR4734	NR_039887	ENSG00000275238	111.186	-0.509593	0.099417	100.781	-0.148848	0.57193	85.2746	-0.955464	0.0137583	76.344	-0.473285	0.191048	81.1521	-1.11108	0.00276245	74.3447	-0.521584	0.180086
N4BP1_NM_153029	N4BP1	NM_153029	ENSG00000102921	68.4734	-0.299316	NA	30.6572	0.163772	NA	56.2203	-0.474053	0.28515	24.0133	0.0227835	NA	43.9113	-1.37256	0.0027808	21.0956	-0.256222	NA
E2F3_NM_001243076	E2F3	NM_001243076	ENSG00000112242	77.8041	-0.306239	0.285384	49.8035	-0.334728	NA	54.5326	-1.01923	0.0215326	38.0695	-0.668536	NA	50.4312	-1.32146	0.00278584	38.7493	-0.631368	0.203834
MAMSTR_NM_001130915	MAMSTR	NM_001130915	ENSG00000176909	57.8167	-0.328008	NA	55.7721	-0.14942	NA	43.3908	-0.804304	0.0857288	46.5191	-0.195448	0.635307	36.8185	-1.45589	0.00281822	39.1853	-0.640519	0.213712
TUBGCP3_NM_001286277	TUBGCP3	NM_001286277	ENSG00000126216	93.361	-0.528537	0.105175	60.0306	-0.249567	NA	73.0054	-0.916131	0.029478	46.2864	-0.538566	0.195687	67.652	-1.19086	0.00282976	43.9305	-0.700378	0.127014
MEF2C-AS1_NR_104031	MEF2C-AS1	NR_104031	ENSG00000248309	133.533	-0.372501	0.17948	169.348	-0.266095	0.324934	100.068	-0.872611	0.0270117	119.832	-0.86643	0.0160423	93.0757	-1.14522	0.00282976	105.452	-1.40238	5.80391e-05
ABCA2_NM_212533	ABCA2	NM_212533	ENSG00000107331	79.6723	-0.492531	0.128185	33.6475	-0.0925485	NA	61.8452	-0.886904	0.0414813	26.9644	-0.241168	NA	55.5345	-1.28881	0.00282976	27.0501	-0.206728	NA
THCAT158_NR_110880	THCAT158	NR_110880	N/A	92.0952	-0.584012	0.0792427	30.4852	0.0910308	NA	74.7222	-0.832761	0.0385328	25.2155	0.0641792	NA	68.593	-1.15685	0.0028428	22.3457	-0.198254	NA
NREP_NM_001142479	NREP	NM_001142479	ENSG00000134986	90.4017	-0.392741	0.184594	79.4166	-0.148649	0.604775	71.2953	-0.718546	0.0857481	57.6947	-0.595419	0.143592	62.3093	-1.22552	0.00284751	58.018	-0.580396	0.188922
ZNF707_NM_001100598	ZNF707	NM_001100598	ENSG00000181135	110.518	-0.426666	0.139972	51.4837	-0.224759	NA	83.8708	-0.891064	0.0239469	40.4647	-0.448808	0.293703	78.8241	-1.11018	0.00284751	42.5237	-0.290077	0.538207
PDCD6IPP2_NR_037599	PDCD6IPP2	NR_037599	N/A	77.8018	-0.387342	0.193788	95.5086	-0.167122	0.534055	56.0213	-1.02139	0.0198819	73.8576	-0.435836	0.235316	52.7566	-1.2664	0.00289235	62.596	-0.999089	0.0138995
CFL1_NM_005507	CFL1	NM_005507	ENSG00000172757	68.7434	-0.432515	NA	46.2222	-0.376885	NA	51.1761	-0.975201	0.0338557	34.0185	-0.835578	NA	46.6776	-1.36178	0.00289383	32.2138	-1.04851	0.039935
NDUFC2-KCTD14_NM_001203260	NDUFC2-KCTD14	NM_001203260	ENSG00000259112	69.9815	-0.510439	0.121812	86.7506	-0.372177	0.233922	52.1633	-1.06486	0.0170604	65.4464	-0.761431	0.0494482	48.0633	-1.36946	0.00289383	57.3325	-1.29823	0.00167404
DDX26B-AS1_NR_046740	DDX26B-AS1	NR_046740	ENSG00000225235	45.9937	-0.574662	NA	24.6121	-0.71786	NA	37.6294	-0.821572	0.0963777	20.0319	-1.0362	NA	31.5701	-1.53423	0.00289383	20.7325	-0.979031	NA
PLOD1_NM_000302	PLOD1	NM_000302	ENSG00000083444	54.7622	-0.633173	NA	32.4414	0.0448515	NA	41.1253	-1.20135	0.0125961	26.0001	-0.0627116	NA	39.2885	-1.41132	0.00292832	24.8264	-0.145676	NA
PPCS_NM_001287506	PPCS	NM_001287506	ENSG00000127125	72.5216	-0.517992	0.116911	82.0277	-0.491671	0.149597	59.9023	-0.710715	0.0997347	65.0447	-0.740252	0.058926	50.9336	-1.307	0.00292832	58.2402	-1.11804	0.00807335
BSCL2_NR_037948	BSCL2	NR_037948	ENSG00000168000	91.2793	-0.4489	0.14501	34.5555	-0.256464	NA	67.9717	-1.01358	0.0173952	29.7238	-0.270969	NA	64.5532	-1.2167	0.00295092	26.9323	-0.527215	NA
DLG4_NM_001128827	DLG4	NM_001128827	ENSG00000132535	53.2377	-0.71804	NA	33.9299	-0.344699	NA	46.7742	-0.719341	0.119876	26.9093	-0.579125	NA	39.4215	-1.40759	0.00295092	27.4708	-0.531202	0.331002
MT1E_NM_175617	MT1E	NM_175617	ENSG00000169715	55.7899	-0.517505	NA	45.2776	-0.439984	NA	48.963	-0.52365	0.238502	35.9764	-0.677895	NA	38.4769	-1.43448	0.00295594	35.8673	-0.706656	0.155372
DCAF11_NM_025230	DCAF11	NM_025230	ENSG00000100897	65.1396	-0.406054	NA	34.1978	-0.145231	NA	48.866	-0.898516	0.0479623	27.3098	-0.32171	NA	43.4299	-1.36416	0.00297066	29.2823	-0.109958	0.842338
ANAPC15_NM_001278485	ANAPC15	NM_001278485	ENSG00000110200	56.0007	-0.580942	NA	50.8855	-0.254269	NA	44.5788	-0.911112	0.0536527	41.3906	-0.405517	0.349597	38.4489	-1.49995	0.00297303	35.6216	-0.882226	0.0807026
GNB2L1_NM_006098	GNB2L1	NM_006098	ENSG00000204628	63.5822	-0.483112	NA	113.406	-0.374737	0.205539	47.0905	-1.06353	0.0251525	79.1357	-1.06444	0.00477988	43.0304	-1.4359	0.00297303	78.474	-1.07683	0.00338183
RNF41_NM_194359	RNF41	NM_194359	ENSG00000181852	62.6974	-0.682859	NA	42.3831	-0.454614	NA	50.6462	-0.967715	0.0347954	36.7303	-0.451265	NA	45.5009	-1.39201	0.00297503	34.0945	-0.648245	0.201434
IL12RB1_NM_001290023	IL12RB1	NM_001290023	ENSG00000096996	106.498	-0.281329	0.283364	73.5475	-0.371373	NA	78.6157	-0.794462	0.0464254	56.8296	-0.667553	0.102622	71.5166	-1.13961	0.00297503	57.3046	-0.64039	0.128596
DDX3Y_NM_001302552	DDX3Y	NM_001302552	ENSG00000067048	41.5917	-0.845821	NA	18.7225	-0.27368	NA	31.0725	-1.52819	0.00421935	17.2472	-0.167968	NA	31.4169	-1.53527	0.00297503	14.9	-0.500054	NA
ELMSAN1_NM_001043318	ELMSAN1	NM_001043318	ENSG00000156030	106.899	-0.367012	0.193788	118.884	-0.41237	0.19224	82.4732	-0.758174	0.0629044	86.1974	-0.955027	0.011372	73.8427	-1.15906	0.00299194	79.4556	-1.30239	0.000376304
POLR2A_NM_000937	POLR2A	NM_000937	ENSG00000181222	86.2799	-0.606483	0.0801715	57.0027	-0.0428214	NA	65.7189	-1.11199	0.00862529	45.6587	-0.182434	0.670406	64.4416	-1.1767	0.00299194	42.7613	-0.341076	0.475898
PLEC_NM_000445	PLEC	NM_000445	ENSG00000178209	98.487	-0.439858	0.145057	84.3133	-0.200655	0.474031	71.5684	-1.06014	0.0103072	68.068	-0.339918	0.351295	70.0191	-1.13696	0.00299194	64.3533	-0.488784	0.224437
C6orf223_NM_001171992	C6orf223	NM_001171992	ENSG00000181577	83.1535	-0.352727	0.320948	79.3812	-0.638948	0.0924988	56.2442	-1.44529	0.00102009	55.3043	-1.42897	0.000853906	59.0606	-1.21114	0.00299235	50.1798	-1.61431	0.011398
STAT6_NM_001178078	STAT6	NM_001178078	ENSG00000166888	90.7351	-0.541619	0.100375	70.144	-0.528242	NA	66.5732	-1.1867	0.00452121	53.763	-0.913995	0.0312218	66.4113	-1.17229	0.00300285	45.0923	-1.72223	0.000162633
LOC101928068_NR_111907	LOC101928068	NR_111907	N/A	244.569	-0.273502	0.226907	146.241	-0.483022	0.110431	183.618	-0.735459	0.0297611	114.522	-0.771008	0.0275542	173.018	-0.927933	0.00302266	99.5505	-1.34198	5.5352e-05
G3BP2_NM_012297	G3BP2	NM_012297	ENSG00000138757	49.0489	-0.523782	NA	53.3981	-0.404693	NA	36.8997	-1.04366	0.0378885	47.6877	-0.306659	0.465953	33.3122	-1.52089	0.00302266	36.947	-1.11895	0.0216012
PLA2G2C_NM_001105572	PLA2G2C	NM_001105572	N/A	48.2152	-0.667352	NA	105.094	-0.649334	0.0727512	34.1099	-1.56063	0.00296468	71.8014	-1.57539	4.72381e-05	34.2256	-1.54338	0.0030378	67.0018	-1.98711	4.23917e-07
LRRC8B_NM_001134476	LRRC8B	NM_001134476	ENSG00000197147	70.903	-0.485645	0.140877	43.9078	-0.184039	NA	50.6086	-1.22489	0.00829121	39.4325	-0.0537014	0.900786	49.8651	-1.31428	0.00303894	34.222	-0.402444	0.423943
LGALS12_NM_001142535	LGALS12	NM_001142535	ENSG00000133317	87.5857	-0.562514	0.0931564	95.5407	-0.659442	0.0732995	63.2891	-1.25385	0.00345678	68.377	-1.36509	0.000494097	64.3098	-1.17297	0.00303894	61.1346	-1.92974	5.24484e-06
PSD4_NM_012455	PSD4	NM_012455	ENSG00000125637	66.1425	-0.519524	NA	55.9949	-0.287161	NA	51.5988	-0.908918	0.0416591	40.015	-0.81158	0.0687915	45.4189	-1.38933	0.00303894	42.3883	-0.62176	0.182465
UPF2_NM_015542	UPF2	NM_015542	ENSG00000151461	65.5409	-0.495579	NA	66.8674	-0.408078	NA	49.4362	-0.997139	0.0297611	54.2936	-0.563829	0.157772	45.4784	-1.35638	0.00306649	50.3423	-0.816353	0.0629751
MCMBP_NM_001256378	MCMBP	NM_001256378	ENSG00000197771	72.4089	-0.51738	0.116911	54.2374	-0.172794	NA	57.3782	-0.850129	0.0491923	42.2104	-0.432767	0.314926	51.2367	-1.30744	0.00307137	38.8922	-0.682625	0.160713
IQCH-AS1_NR_040056	IQCH-AS1	NR_040056	N/A	87.9034	-0.383974	0.185923	47.5828	-0.60255	NA	67.1564	-0.810066	0.050203	39.0253	-0.802426	0.0839732	60.5677	-1.19507	0.00307137	41.5263	-0.595606	0.224749
MICALL1_NM_033386	MICALL1	NM_033386	ENSG00000100139	81.783	-0.526947	0.107485	66.5017	-0.0577316	NA	63.1278	-0.95563	0.0239469	48.9628	-0.428866	0.289797	58.9183	-1.21608	0.00307694	49.1836	-0.396939	0.372558
ZBTB25_NM_006977	ZBTB25	NM_006977	ENSG00000089775	97.4939	-0.383773	0.182279	46.3332	-0.351432	NA	69.939	-1.05345	0.0137034	44.0116	-0.0975037	0.815513	67.8641	-1.16238	0.0030852	37.0422	-0.567651	0.254398
LYST_NM_000081	LYST	NM_000081	ENSG00000143669	84.6507	-0.346644	0.230184	175.588	-0.571297	0.0726801	61.488	-0.937006	0.0331572	132.751	-1.00292	0.0018527	56.3562	-1.25466	0.00309788	120.399	-1.43559	3.03258e-06
CD63_NM_001257392	CD63	NM_001257392	ENSG00000135404	53.2198	-0.360637	NA	51.9228	-0.0810677	NA	42.6303	-0.612547	0.186967	40.1043	-0.301399	0.478478	34.0609	-1.4763	0.00309788	39.4522	-0.343291	0.473932
HRH2_NM_001131055	HRH2	NM_001131055	ENSG00000113749	74.2116	-0.463178	0.142579	92.8619	-0.429854	0.178647	53.4418	-1.10346	0.0166524	65.8543	-1.06652	0.00762248	51.3946	-1.27868	0.00309788	63.7953	-1.21707	0.00220759
CDKN1A_NM_001291549	CDKN1A	NM_001291549	ENSG00000124762	68.7114	-0.568474	NA	80.7865	-0.88422	0.0389056	52.7202	-1.04911	0.0183954	62.3279	-1.33003	0.00121038	49.649	-1.30394	0.00310067	61.0061	-1.46207	0.000279489
LOC100132356_NR_034127	LOC100132356	NR_034127	N/A	90.5128	-0.370089	0.199562	149.207	-0.420744	0.15629	72.857	-0.62067	0.128005	123.797	-0.509648	0.137834	61.666	-1.2185	0.00310257	104.302	-1.12228	0.000993325
TMEM233_NM_001136534	TMEM233	NM_001136534	ENSG00000224982	58.6592	-0.310177	NA	106.753	-0.753006	0.0467468	41.9413	-0.933248	0.0491118	78.1277	-1.38065	0.000292379	37.2476	-1.43586	0.00311026	75.6194	-1.53296	5.17075e-05
LTB4R_NM_181657	LTB4R	NM_181657	ENSG00000213903	106.885	-0.567516	0.0783577	57.3026	-0.275425	NA	78.829	-1.18517	0.00288173	48.7013	-0.293615	0.464667	80.391	-1.08396	0.00311059	44.124	-0.559284	0.227671
NKAPL_NM_001007531	NKAPL	NM_001007531	ENSG00000189134	80.7737	-0.505569	0.118415	78.6941	-0.528544	0.138458	62.0578	-0.960809	0.024963	60.4759	-0.898764	0.0302078	57.4735	-1.24438	0.00313541	51.7872	-1.58894	0.000205347
LYRM1_NM_001302835	LYRM1	NM_001302835	ENSG00000102897	56.4523	-0.506034	NA	82.2205	-0.482419	0.155763	40.5728	-1.20312	0.0136562	60.2222	-1.00597	0.0138	38.6214	-1.42533	0.00313749	54.5486	-1.42082	0.000814255
HSBP1_NM_001537	HSBP1	NM_001537	ENSG00000230989	65.5773	-0.449679	NA	33.8473	-0.470267	NA	48.9646	-0.985977	0.0358138	30.9265	-0.335136	NA	44.5568	-1.37926	0.00313749	31.2109	-0.303003	0.562882
TTC39C_NM_001135993	TTC39C	NM_001135993	ENSG00000168234	50.5843	-0.412907	NA	71.5252	-0.466205	NA	39.2852	-0.785433	0.104335	56.59	-0.720104	0.073997	32.545	-1.53628	0.00314083	52.0742	-1.00411	0.019539
RPS13_NM_001017	RPS13	NM_001017	ENSG00000110700	58.7982	-0.432624	NA	63.0176	-0.236031	NA	43.9794	-0.954882	0.0449952	48.246	-0.552833	0.187225	39.0536	-1.42372	0.00315193	41.3132	-1.08164	0.0202324
KLLN_NM_001126049	KLLN	NM_001126049	ENSG00000227268	97.4093	-0.452651	0.135557	87.2775	-0.484808	0.144395	75.3345	-0.867863	0.0297611	65.3684	-0.944756	0.0175559	69.6102	-1.14677	0.00317225	66.1635	-0.894854	0.0230462
S100A4_NM_002961	S100A4	NM_002961	ENSG00000196154	59.1627	-0.352254	NA	60.1631	-0.539144	NA	43.6762	-0.859002	0.069884	46.2697	-0.92325	0.0355033	38.2944	-1.41117	0.00317887	44.3759	-1.08414	0.0170125
RPLP1_NM_001003	RPLP1	NM_001003	ENSG00000137818	59.8655	-0.78936	NA	59.5481	-0.266436	NA	51.5794	-0.878303	0.0535727	47.9784	-0.426539	0.300408	46.0728	-1.33607	0.00317887	45.9248	-0.546886	0.232827
YBX1_NM_004559	YBX1	NM_004559	ENSG00000065978	69.0808	-0.592431	0.0958915	28.8894	-0.384944	NA	55.1983	-0.909952	0.039058	20.9231	-0.901823	NA	49.3554	-1.32968	0.00317941	24.1814	-0.486228	NA
MT2A_NM_005953	MT2A	NM_005953	ENSG00000125148	52.1496	-0.449417	NA	30.8323	0.0192075	NA	38.1998	-1.06591	0.0314705	28.0671	0.184458	NA	34.8297	-1.4626	0.00318198	33.9151	0.613824	0.223376
ABCA7_NM_019112	ABCA7	NM_019112	ENSG00000064687	95.281	-0.373228	0.193141	49.7996	0.0275916	NA	75.6878	-0.659581	0.102617	42.922	0.0810158	0.84925	65.0079	-1.20784	0.00318808	43.0297	0.126481	0.797191
LOC115110_NR_037844	LOC115110	NR_037844	ENSG00000238164	50.9961	-0.639878	NA	119.13	-0.561073	0.092804	38.7858	-1.16807	0.0166208	88.1915	-1.09116	0.00265384	36.521	-1.43444	0.00320265	82.0461	-1.41999	6.6566e-05
VAMP2_NM_014232	VAMP2	NM_014232	ENSG00000220205	59.383	-0.302576	NA	55.7517	-0.331711	NA	43.7794	-0.808769	0.0828057	39.7036	-0.896103	0.0466301	37.2901	-1.43901	0.00324153	40.4751	-0.817383	0.0888873
SIRPA_NM_080792	SIRPA	NM_080792	ENSG00000198053	73.3483	-0.439778	0.167307	73.3708	-0.341911	NA	49.1475	-1.39798	0.00265152	54.7996	-0.752702	0.0640218	50.5127	-1.27475	0.00324153	46.2986	-1.42513	0.00131058
UNC13D_NM_199242	UNC13D	NM_199242	ENSG00000092929	57.6771	-0.579968	NA	97.9924	-0.445259	0.16314	43.4793	-1.1264	0.0170238	70.84	-1.01647	0.0112215	41.029	-1.39212	0.00324713	67.6669	-1.19329	0.00197621
LOC158434_NR_132344	LOC158434	NR_132344	ENSG00000275465	68.2837	-0.695693	NA	51.0881	-0.389481	NA	53.5811	-1.10893	0.0127408	38.6559	-0.769726	NA	51.5255	-1.2719	0.00324713	36.8218	-0.960361	0.0489732
DNAJA4_NM_001130182	DNAJA4	NM_001130182	ENSG00000140403	63.257	-0.745316	NA	56.0893	-0.370439	NA	48.9386	-1.2357	0.00701363	48.4211	-0.362747	0.368468	48.0629	-1.3036	0.00325014	42.4902	-0.754938	0.103829
SEC24C_NM_004922	SEC24C	NM_004922	ENSG00000176986	68.1226	-0.790072	NA	46.9929	-0.100303	NA	58.296	-0.907192	0.0387193	40.4774	-0.0570749	0.89364	52.8769	-1.31239	0.00326092	34.798	-0.439013	0.37966
SFXN4_NM_213649	SFXN4	NM_213649	ENSG00000183605	74.7029	-0.651953	0.0702553	89.7798	-0.502794	0.138458	56.7432	-1.14982	0.0123953	62.1981	-1.26824	0.00188669	55.2218	-1.3055	0.00326092	61.4107	-1.34833	0.000772192
NDUFB1_NM_004545	NDUFB1	NM_004545	ENSG00000183648	77.9394	-0.419274	0.167859	42.9373	-0.162549	NA	59.8913	-0.836576	0.0511888	37.4138	-0.112857	NA	53.7832	-1.24869	0.00327814	34.2154	-0.311418	0.539513
GABPB2_NM_144618	GABPB2	NM_144618	ENSG00000143458	70.9515	-0.401989	0.192376	78.0871	-0.379276	0.23975	54.6178	-0.80202	0.0681566	63.0359	-0.560814	0.143592	48.0723	-1.30367	0.0032903	57.8521	-0.829144	0.0460739
SNF8_NM_007241	SNF8	NM_007241	ENSG00000159210	61.7893	-0.518525	NA	37.2069	-0.181374	NA	47.4763	-0.962351	0.0380533	32.7411	-0.129206	NA	43.1325	-1.34569	0.0032903	29.2695	-0.387131	0.465238
PCBP1-AS1_NR_033872	PCBP1-AS1	NR_033872	ENSG00000179818	99.4161	-0.424628	0.149499	218.579	-0.374346	0.16314	76.9444	-0.812661	0.0457063	170.569	-0.652501	0.0379391	70.1021	-1.14533	0.0032903	147.442	-1.21532	5.99879e-05
HIST1H4F_NM_003540	HIST1H4F	NM_003540	ENSG00000274618	73.0576	-0.509482	0.188041	111.131	-0.6157	0.0924988	57.4549	-1.20909	0.011389	83.9971	-1.08707	0.00760014	55.6152	-1.35648	0.0032903	83.5648	-1.07908	0.00764879
EIF4E2_NM_001276336	EIF4E2	NM_001276336	ENSG00000135930	64.5135	-0.43904	NA	41.5084	-0.00541504	NA	45.7419	-1.17885	0.0115106	27.8875	-0.578608	NA	44.0041	-1.33915	0.00329974	27.9257	-0.592698	0.268219
INTS3_NM_023015	INTS3	NM_023015	ENSG00000143624	51.2152	-0.388633	NA	63.0319	-0.466221	NA	34.5843	-1.30228	0.0119665	46.9727	-0.919639	0.0337763	33.2621	-1.49199	0.00331151	49.0643	-0.766922	0.0812603
HSPA9_NM_004134	HSPA9	NM_004134	ENSG00000113013	78.488	-0.538207	0.106641	65.0312	-0.470439	NA	57.4795	-1.17933	0.00985317	49.3304	-0.881047	0.0390614	56.7243	-1.2252	0.00331151	48.4758	-0.944265	0.0336354
SMARCA2_NM_001289398	SMARCA2	NM_001289398	ENSG00000080503	60.4358	-0.539655	NA	68.6553	-0.596642	NA	43.5507	-1.26723	0.0104316	53.3492	-0.956044	0.0302383	42.3639	-1.39052	0.00331287	47.1971	-1.45948	0.00214408
UGP2_NM_006759	UGP2	NM_006759	ENSG00000169764	87.8871	-0.427419	0.157345	50.909	0.178709	NA	64.3878	-1.01679	0.015889	38.2	-0.0709862	NA	61.5816	-1.18553	0.00331498	39.2873	0.0203951	0.969937
CSNK1E_NM_001894	CSNK1E	NM_001894	ENSG00000213923	80.7524	-0.735229	0.0581549	64.2295	-0.685391	NA	59.6299	-1.41021	0.00175407	47.5178	-1.26005	0.00405017	62.6171	-1.20131	0.00331498	49.4708	-1.12171	0.0111112
WDR5_NM_017588	WDR5	NM_017588	ENSG00000196363	66.4737	-0.481576	NA	44.9868	-0.290669	NA	50.8106	-0.929431	0.0388243	32.8032	-0.737849	NA	45.1525	-1.37907	0.00331975	31.2255	-0.909874	0.080281
PTGES3_NR_104219	PTGES3	NR_104219	ENSG00000110958	83.7313	-0.427584	0.15408	73.4886	-0.203089	NA	61.7712	-1.00038	0.0184761	60.2819	-0.298594	0.428032	58.3959	-1.20761	0.00332196	54.241	-0.587102	0.172276
NME4_NM_001286440	NME4	NM_001286440	ENSG00000103202	66.9294	-0.358478	NA	59.4278	-0.394109	NA	48.3957	-0.962532	0.0358138	48.2658	-0.534929	0.205769	43.9942	-1.34496	0.00334805	44.6571	-0.781366	0.0938717
RABGGTB_NM_004582	RABGGTB	NM_004582	ENSG00000137955	61.4859	-0.443092	NA	38.4804	-0.266965	NA	49.2036	-0.724066	0.108019	32.4761	-0.321864	NA	41.718	-1.36432	0.00339075	33.3958	-0.227568	0.680524
SPINT2_NM_001166103	SPINT2	NM_001166103	ENSG00000167642	73.0175	-0.339339	0.249928	82.1737	-0.62361	0.092804	55.9985	-0.743392	0.0920246	60.0285	-1.20941	0.00321107	48.3196	-1.30018	0.00339075	60.5526	-1.18175	0.0032629
CD46_NM_002389	CD46	NM_002389	ENSG00000117335	44.5522	-0.757051	NA	40.4168	-0.379552	NA	37.7008	-0.684492	0.277723	32.9661	-0.555448	NA	33.0161	-1.52985	0.00339167	34.3213	-0.443841	0.387674
IFITM2_NM_006435	IFITM2	NM_006435	ENSG00000185201	44.4888	-0.412648	NA	27.2258	-0.00508165	NA	32.8189	-0.964287	0.0573599	19.2105	-0.425896	NA	28.6491	-1.5537	0.00340699	16.2546	-0.919029	NA
C14orf93_NM_001130706	C14orf93	NM_001130706	ENSG00000100802	65.678	-0.620681	NA	95.8209	-0.542353	0.137061	54.2764	-0.835846	0.0612138	75.339	-0.845797	0.0413655	48.1954	-1.30551	0.00341094	63.5701	-1.59336	0.000213261
HLX_NM_021958	HLX	NM_021958	ENSG00000136630	93.9032	-0.352886	0.214302	122.97	-0.222146	0.393357	72.9378	-0.705292	0.0788736	88.5918	-0.732151	0.039718	63.3578	-1.20242	0.00342418	83.7377	-0.935258	0.00936263
OLMALINC_NR_026762	OLMALINC	NR_026762	ENSG00000235823	72.9659	-0.40012	0.199247	121.121	-0.232075	0.386626	53.2315	-1.01501	0.0265731	75.9577	-1.27774	0.0013456	49.4667	-1.31772	0.00342418	66.6636	-2.0381	2.84355e-07
RPL3_NM_000967	RPL3	NM_000967	ENSG00000100316	64.6438	-0.871377	NA	85.7192	-0.243839	0.396377	53.0364	-1.16082	0.0107053	66.3477	-0.524556	0.165705	51.4462	-1.26936	0.00342418	63.85	-0.628877	0.119346
NDUFA13_NM_015965	NDUFA13	NM_015965	ENSG00000186010	95.5125	-0.312882	0.250354	79.4405	-0.472745	0.161663	72.1719	-0.761237	0.0609934	68.2671	-0.465501	0.213095	64.6487	-1.1562	0.0034349	64.821	-0.608963	0.129091
EFCAB6_NM_022785	EFCAB6	NM_022785	ENSG00000186976	52.0448	-0.690367	NA	26.3411	-0.089085	NA	41.6035	-1.04655	0.0278044	20.7264	-0.258916	NA	37.9364	-1.42037	0.00343622	20.0934	-0.353626	NA
ETV3_NM_001145312	ETV3	NM_001145312	ENSG00000117036	56.6323	-0.460804	NA	37.7179	-0.0155837	NA	44.998	-0.771704	0.0944817	27.9846	-0.30685	NA	38.4373	-1.39776	0.00346541	22.7717	-0.912214	NA
CDKN2D_NM_079421	CDKN2D	NM_079421	ENSG00000129355	103.772	-0.367827	0.188444	61.1208	-0.0313749	NA	80.3325	-0.744752	0.0609934	46.602	-0.277279	0.500832	72.3365	-1.11948	0.00347015	43.2622	-0.48004	0.30221
ATP6V0D1_NM_004691	ATP6V0D1	NM_004691	ENSG00000159720	82.7348	-0.676494	0.0604985	35.8538	-0.0427705	NA	66.06	-1.0152	0.0149228	30.605	-0.0147954	NA	63.4794	-1.16051	0.00350418	29.0872	-0.101594	0.857442
ENO1-AS1_NR_038351	ENO1-AS1	NR_038351	ENSG00000230679	92.1403	-0.407047	0.159563	123.351	-0.42516	0.163111	68.6757	-0.912635	0.0294226	89.5441	-0.968226	0.00760073	63.8599	-1.18123	0.00351227	78.2135	-1.52858	0.000100371
PRKRA_NM_003690	PRKRA	NM_003690	ENSG00000180228	55.3235	-0.697269	NA	28.9273	0.131069	NA	41.5185	-1.31495	0.00674617	23.1593	0.0376235	NA	40.9584	-1.39066	0.00351659	23.5556	0.083747	NA
POLE3_NR_027261	POLE3	NR_027261	ENSG00000148229	60.2794	-0.555613	NA	67.1704	-0.500528	NA	45.5601	-1.08401	0.0235476	52.3899	-0.791689	0.0624026	42.446	-1.39067	0.00352046	49.6652	-1.01911	0.0194883
TMEM87A_NM_001110503	TMEM87A	NM_001110503	ENSG00000103978	91.8401	-0.398908	0.17661	34.2893	-0.355753	NA	67.3479	-0.992057	0.0204032	28.0885	-0.506484	NA	64.0421	-1.1838	0.00355949	32.7423	-0.112779	0.841542
AAK1_NM_014911	AAK1	NM_014911	ENSG00000115977	100.652	-0.581279	0.0801715	75.3934	-0.304732	0.325241	78.0403	-1.02525	0.013274	62.6185	-0.386389	0.320105	75.9416	-1.1203	0.00356199	54.5366	-0.781374	0.0806084
SENP6_NM_001100409	SENP6	NM_001100409	ENSG00000112701	107.211	-0.145316	0.584137	168.529	-0.265133	0.298951	89.2416	-0.256984	0.512895	130.957	-0.535737	0.0895587	67.7727	-1.19867	0.00356199	112.29	-1.08629	0.000605857
LEPROTL1_NM_001128208	LEPROTL1	NM_001128208	ENSG00000104660	117.459	-0.528412	0.0874569	82.2215	-0.227659	0.426735	92.476	-0.880142	0.0207249	67.021	-0.347606	0.343635	87.7952	-1.0427	0.00356199	61.7692	-0.572951	0.160148
HNRNPA0_NM_006805	HNRNPA0	NM_006805	ENSG00000177733	61.0975	-0.640384	NA	66.9608	-0.100667	NA	48.4255	-0.998905	0.0290552	47.9437	-0.553987	0.197361	44.7209	-1.32296	0.00357373	45.4675	-0.749935	0.115389
ARHGEF1_NM_199002	ARHGEF1	NM_199002	ENSG00000076928	103.735	-0.796933	0.0298737	40.1839	0.133984	NA	87.343	-0.927946	0.0172666	39.9792	0.504181	0.257334	82.055	-1.13115	0.00358885	35.0357	0.282221	0.581167
PPP1CB_NM_002709	PPP1CB	NM_002709	ENSG00000213639	73.4781	-0.536428	0.107656	54.6261	-0.172013	NA	52.3509	-1.30128	0.00361321	46.4825	-0.189752	0.648191	53.0031	-1.23433	0.00359349	39.4415	-0.652686	0.175259
NRF1_NM_001293163	NRF1	NM_001293163	ENSG00000106459	77.6282	-0.437388	0.156048	49.1907	-0.0552608	NA	62.4703	-0.706185	0.0923336	38.374	-0.265567	NA	54.2753	-1.2279	0.00359986	36.7394	-0.363387	0.458346
SCARNA13_NR_003002	SCARNA13	NR_003002	ENSG00000252481	63.974	-0.652056	NA	33.9215	-0.146399	NA	49.0752	-1.15334	0.0117175	25.5448	-0.46883	NA	46.9872	-1.31242	0.00360216	27.9832	-0.23454	0.675661
DDX39A_NM_005804	DDX39A	NM_005804	ENSG00000123136	107.003	-0.40787	0.156048	76.5517	-0.117459	0.668997	79.8817	-0.926846	0.0218626	58.1981	-0.414147	0.283366	75.8103	-1.11647	0.00360216	54.5479	-0.582874	0.179825
TBC1D5_NM_014744	TBC1D5	NM_014744	ENSG00000131374	110.939	-0.188611	0.466417	110.613	-0.230028	0.405556	78.2585	-0.831693	0.0400596	90.0438	-0.359629	0.308741	70.3183	-1.20999	0.00360216	71.984	-1.12072	0.00441236
SDHAF3_NM_020186	SDHAF3	NM_020186	ENSG00000196636	48.8829	-0.263902	NA	122.722	-0.582524	0.0924988	33.0856	-1.06166	0.045346	84.2765	-1.46674	0.00016659	29.4799	-1.58441	0.00360216	78.8704	-1.85737	1.01256e-06
NUDT1_NM_198950	NUDT1	NM_198950	ENSG00000106268	59.4298	-0.384054	NA	58.9129	-0.286299	NA	47.4479	-0.64381	0.162776	44.7039	-0.623561	0.14284	39.0406	-1.41081	0.00361574	41.6059	-0.859585	0.068069
MRPS15_NM_031280	MRPS15	NM_031280	ENSG00000116898	57.8718	-0.532809	NA	65.9063	-0.0977895	NA	42.9907	-1.10757	0.0264555	51.3251	-0.322617	0.421212	39.9353	-1.44276	0.00366421	42.8256	-0.8711	0.0605546
CFLAR_NM_001127184	CFLAR	NM_001127184	ENSG00000003402	84.2511	-0.46888	0.132076	167.553	-0.406723	0.146727	66.6849	-0.79482	0.0608246	126.131	-0.818343	0.0207667	59.9718	-1.19952	0.00366421	110.706	-1.35295	2.31009e-05
RASGRP2_NM_001098671	RASGRP2	NM_001098671	ENSG00000068831	99.1701	-0.44649	0.132123	97.5123	-0.371319	0.225166	72.2049	-1.08061	0.00775311	72.8521	-0.795278	0.0362431	71.0099	-1.13665	0.00369111	65.9509	-1.14672	0.00431787
FNDC3A_NM_001079673	FNDC3A	NM_001079673	ENSG00000102531	85.7714	-0.640742	0.0717789	73.6685	-0.276863	NA	69.3162	-0.948925	0.0216314	58.9211	-0.464824	0.231192	65.4242	-1.1736	0.00370607	49.8399	-1.04269	0.0176513
LOC101928295_NR_110729	LOC101928295	NR_110729	ENSG00000268686	106.392	-0.404363	0.156444	83.4785	-0.167339	0.57009	78.574	-0.945188	0.0184893	61.0205	-0.606885	0.142706	75.7289	-1.07918	0.00371336	56.4692	-0.848231	0.066748
PPP1CB_NM_206876	PPP1CB	NM_206876	ENSG00000213639	73.2599	-0.530395	0.111147	55.0528	-0.170261	NA	52.3645	-1.27479	0.00421935	47.0028	-0.179969	0.664522	52.7269	-1.2319	0.00371432	40.1328	-0.617199	0.195886
YWHAZ_NM_001135699	YWHAZ	NM_001135699	ENSG00000164924	102.801	-0.360159	0.194791	64.4744	-0.398104	NA	85.3816	-0.494431	0.193479	51.1927	-0.638988	0.118782	71.5067	-1.1057	0.00372606	51.7431	-0.602741	0.165404
PHACTR3_NM_183244	PHACTR3	NM_183244	ENSG00000087495	59.037	-0.689322	NA	101.529	-0.79943	0.0389056	41.8423	-1.56438	0.00113346	73.7482	-1.52294	0.000155733	44.0749	-1.31802	0.00373792	71.0993	-1.73748	6.04504e-06
VPS54_NM_001005739	VPS54	NM_001005739	ENSG00000143952	75.2269	-0.600092	0.0872536	55.4475	-0.0834574	NA	57.8838	-1.07368	0.0149228	40.6495	-0.475873	0.27238	55.6891	-1.22014	0.00374703	37.7373	-0.68883	0.155013
NUDT1_NM_002452	NUDT1	NM_002452	ENSG00000106268	58.8571	-0.372077	NA	58.3358	-0.289164	NA	47.5604	-0.589096	0.201553	44.1314	-0.635481	0.137999	38.447	-1.40597	0.00375484	40.7566	-0.902566	0.0574723
ING4_NM_001127582	ING4	NM_001127582	ENSG00000111653	64.2569	-0.492458	NA	41.671	-0.0865348	NA	57.6538	-0.425768	0.33176	33.804	-0.189876	NA	44.8434	-1.33132	0.00375753	31.5859	-0.373185	0.477709
LOC100288798_NR_125381	LOC100288798	NR_125381	N/A	75.4095	-0.524285	0.115527	66.193	-0.324168	NA	54.4561	-1.21898	0.00666192	49.7332	-0.728095	0.101233	54.1296	-1.23388	0.00375753	46.0096	-1.02714	0.0323658
BRCA2_NM_000059	BRCA2	NM_000059	ENSG00000139618	58.6513	-0.377085	NA	63.0983	-0.244198	NA	42.8711	-0.951498	0.0433983	46.3591	-0.678629	0.111825	38.6125	-1.38087	0.00377545	44.9569	-0.768684	0.0927336
MSL1_NM_001012241	MSL1	NM_001012241	ENSG00000188895	45.4515	-0.268252	NA	69.8153	-0.106531	NA	33.0988	-0.77811	0.128413	50.9302	-0.503891	0.227466	26.8355	-1.6237	0.00378205	48.5135	-0.667859	0.134328
LAIR1_NM_001289023	LAIR1	NM_001289023	ENSG00000167613	84.322	-0.239141	0.386226	210.063	-0.248372	0.319042	64.5377	-0.619157	0.138937	144.699	-0.950273	0.00311928	54.4705	-1.23675	0.00379591	125.133	-1.61088	9.61819e-08
CCM2_NM_001029835	CCM2	NM_001029835	ENSG00000136280	84.7987	-0.420989	0.158095	88.4447	-0.294982	0.324934	65.9186	-0.804106	0.0567855	66.8577	-0.666332	0.087557	59.0323	-1.20171	0.00379651	60.3482	-1.02257	0.0130954
RNF41_NM_005785	RNF41	NM_005785	ENSG00000181852	60.2534	-0.672624	NA	43.2034	-0.430078	NA	48.9224	-0.936789	0.0429902	37.1756	-0.44016	NA	43.8719	-1.36724	0.00380545	34.3742	-0.654093	0.194168
NDUFV3_NM_001001503	NDUFV3	NM_001001503	ENSG00000160194	43.7495	-0.6339	NA	55.0949	-0.352498	NA	34.4658	-1.0336	0.0403206	40.5084	-0.833762	0.0615034	30.823	-1.50265	0.00382618	39.0983	-0.964881	0.0424736
WDR61_NM_001303247	WDR61	NM_001303247	ENSG00000140395	63.301	-0.383409	NA	39.0509	-0.299981	NA	50.1411	-0.682731	0.129885	34.6436	-0.231174	NA	42.2413	-1.34324	0.00387904	31.5991	-0.456584	0.376791
NEK4_NM_001193533	NEK4	NM_001193533	ENSG00000114904	69.6251	-0.440215	0.164135	22.1948	-0.37397	NA	55.2403	-0.768231	0.0845166	23.3824	0.036133	NA	48.2972	-1.2921	0.003893	20.0925	-0.302364	NA
PFN1_NM_005022	PFN1	NM_005022	ENSG00000108518	79.4506	-0.478713	0.132123	78.0489	-0.195503	0.501033	57.1728	-1.16405	0.00754918	54.9247	-0.757409	0.062813	56.3459	-1.20048	0.0038937	53.8287	-0.810285	0.0581495
CANX_NM_001024649	CANX	NM_001024649	ENSG00000127022	52.0886	-0.364558	NA	57.1687	-0.171255	NA	39.8442	-0.770085	0.106053	43.7415	-0.468702	0.264563	33.4061	-1.45999	0.00389916	40.2981	-0.717047	0.129541
DCAF12_NM_015397	DCAF12	NM_015397	ENSG00000198876	63.3955	-0.457935	NA	96.1015	-0.15847	0.553368	46.0797	-1.08423	0.0193652	73.0444	-0.470776	0.20022	43.4916	-1.32038	0.00390179	64.8918	-0.843927	0.0350473
AGO4_NM_017629	AGO4	NM_017629	ENSG00000134698	63.5237	-0.56843	NA	64.5425	-0.267932	NA	48.7963	-1.01947	0.0259273	47.6712	-0.693856	0.0967454	45.1942	-1.3217	0.00393452	45.8499	-0.814969	0.0710998
POP4_NM_006627	POP4	NM_006627	ENSG00000105171	56.3223	-0.620554	NA	41.1108	-0.00237456	NA	48.1057	-0.716549	0.112224	31.1056	-0.274442	NA	40.2433	-1.38463	0.00394778	31.1894	-0.259973	0.62037
GTF3C2_NM_001035521	GTF3C2	NM_001035521	ENSG00000115207	66.3424	-0.531042	NA	80.9118	-0.57473	0.109542	52.4595	-0.878744	0.0487604	60.2695	-1.07344	0.00888465	46.8855	-1.3043	0.00394778	55.8268	-1.36873	0.00143298
UFC1_NM_016406	UFC1	NM_016406	ENSG00000143222	48.594	-0.294483	NA	96.2214	-0.457251	0.162606	38.2948	-0.587258	0.221406	74.1631	-0.800218	0.0374379	30.1151	-1.50149	0.00395456	65.7238	-1.28494	0.00119581
HCK_NM_001172129	HCK	NM_001172129	ENSG00000101336	89.0375	-0.43464	0.145745	63.208	-0.21496	NA	65.4181	-1.02647	0.0147874	45.8098	-0.684409	0.129816	63.1419	-1.15451	0.00395456	41.5699	-1.04265	0.0388004
HDAC7_NM_001098416	HDAC7	NM_001098416	ENSG00000061273	68.6241	-0.322572	NA	44.726	-0.131907	NA	49.0986	-0.960668	0.0349398	31.3668	-0.65343	NA	45.0297	-1.30329	0.0039615	30.1871	-0.796302	0.132648
DCTN4_NM_001135643	DCTN4	NM_001135643	ENSG00000132912	115.033	-0.120519	0.631963	93.6294	-0.314151	0.303936	83.1684	-0.660953	0.0970973	75.5349	-0.488726	0.202108	72.7582	-1.1262	0.00396882	66.3069	-0.916982	0.0235643
ITPA_NM_001267623	ITPA	NM_001267623	ENSG00000125877	67.663	-0.49027	NA	82.1209	-0.683901	0.0762746	53.1888	-0.844853	0.0607215	61.1675	-1.24804	0.00265384	47.5917	-1.27029	0.00398504	60.3849	-1.32186	0.00117759
NDUFAF3_NM_199069	NDUFAF3	NM_199069	ENSG00000178057	98.9877	-0.297767	0.268559	60.1846	-0.423254	NA	68.5423	-1.07354	0.00950449	43.7878	-0.94182	0.034193	66.5566	-1.14989	0.00404875	45.0117	-0.838813	0.0684432
SIGLEC7_NM_001277201	SIGLEC7	NM_001277201	ENSG00000168995	62.9551	-0.491025	NA	56.2433	-0.554894	NA	47.4134	-0.704025	0.260562	43.2538	-0.923887	0.0384597	43.1001	-1.38844	0.00409694	42.2314	-1.03689	0.0252188
HNRNPU_NM_004501	HNRNPU	NM_004501	ENSG00000153187	143.275	-0.342204	0.193788	130.767	-0.326098	0.242451	114.089	-0.614784	0.0958982	97.9578	-0.735349	0.0347973	101.654	-1.00701	0.00410293	103.219	-0.529029	0.119544
LOC100505549_NM_001242804	LOC100505549	NM_001242804	ENSG00000267040	49.8974	-0.615583	NA	29.9793	-0.0655409	NA	46.2198	-0.483191	0.284419	23.5856	-0.229155	NA	36.008	-1.4199	0.00410398	20.1435	-0.661439	NA
SIRPA_NM_001040022	SIRPA	NM_001040022	ENSG00000198053	70.3314	-0.390187	0.199366	74.2161	-0.237278	NA	46.2407	-1.37119	0.0046109	49.426	-1.00907	0.019812	47.377	-1.28395	0.00412882	47.6676	-1.15573	0.0091025
RNF6_NM_183044	RNF6	NM_183044	ENSG00000127870	74.3479	-0.428938	0.161445	33.3231	-0.039367	NA	55.1157	-0.988118	0.0254385	30.6335	0.1362	NA	51.772	-1.23863	0.00415438	23.7319	-0.469773	NA
RFX1_NM_002918	RFX1	NM_002918	ENSG00000132005	70.8253	-0.525956	0.116911	61.5289	0.0366599	NA	56.5864	-0.822758	0.0577438	51.0009	0.00335085	0.993981	50.7692	-1.23541	0.00417535	45.6025	-0.258857	0.579022
KIAA0907_NM_014949	KIAA0907	NM_014949	ENSG00000132680	62.5234	-0.306126	NA	61.2158	-0.258529	NA	49.3863	-0.59762	0.205392	48.133	-0.494564	0.232178	40.2725	-1.37078	0.00417967	48.6831	-0.431792	0.335007
ZNF644_NM_016620	ZNF644	NM_016620	ENSG00000122482	57.4751	-0.635042	NA	34.4819	-0.0633286	NA	45.702	-0.9735	0.0393146	22.6184	-0.699471	NA	42.0159	-1.33408	0.0041818	26.0008	-0.337445	NA
KHK_NM_000221	KHK	NM_000221	ENSG00000138030	76.6267	-0.466208	0.142579	31.6962	0.168809	NA	55.3587	-1.07617	0.0224539	24.369	0.0135509	NA	54.2028	-1.20539	0.0041818	22.5035	-0.159548	NA
LRRC37A6P_NR_003525	LRRC37A6P	NR_003525	ENSG00000230445	34.9305	-0.839472	NA	19.1443	-0.0249894	NA	34.8048	-0.561882	0.255597	17.5133	0.135342	NA	26.9071	-1.56947	0.00419092	16.8062	0.0923246	NA
BSG_NM_001728	BSG	NM_001728	ENSG00000172270	117.616	-0.413208	0.144346	59.7647	0.0189137	NA	93.2399	-0.707946	0.0597008	44.4236	-0.300921	0.464037	85.0147	-1.03398	0.00419092	44.8096	-0.256651	0.579634
DDB1_NM_001923	DDB1	NM_001923	ENSG00000167986	61.5124	-0.507796	NA	36.1003	-0.06229	NA	52.3657	-0.592209	0.194556	28.2899	-0.250983	NA	43.4611	-1.30865	0.00419346	21.9797	-0.990398	NA
MAP10_NM_019090	MAP10	NM_019090	ENSG00000212916	42.1115	-0.491826	NA	101.711	-0.615826	0.0924988	34.6016	-0.713672	0.149656	71.6783	-1.42628	0.000222793	28.2603	-1.5273	0.00423183	68.3638	-1.66888	1.34743e-05
ACACA_NM_198834	ACACA	NM_198834	ENSG00000278540	55.1763	-0.692628	NA	46.6079	-0.385649	NA	49.087	-0.66112	0.14152	36.2216	-0.716629	NA	40.9911	-1.34191	0.00423183	37.9042	-0.56872	0.243361
TGIF1_NM_003244	TGIF1	NM_003244	ENSG00000177426	79.657	-0.346887	0.231154	119.552	-0.506453	0.121656	62.1929	-0.684502	0.108649	86.5563	-1.09495	0.00315002	53.7628	-1.21195	0.00423183	84.8013	-1.17851	0.00101245
TEAD3_NM_003214	TEAD3	NM_003214	ENSG00000007866	58.631	-0.432453	NA	39.3979	-0.261706	NA	44.6621	-0.876949	0.0633249	24.4898	-1.24164	NA	38.8379	-1.41766	0.00424063	27.4284	-0.84051	0.125274
UBE2Q2_NM_001145335	UBE2Q2	NM_001145335	ENSG00000140367	91.7288	-0.474476	0.128185	66.671	-0.328436	NA	71.8464	-0.832197	0.0471068	54.0199	-0.488133	0.219167	64.4639	-1.21077	0.00427862	49.6503	-0.73875	0.0935158
MBD6_NM_052897	MBD6	NM_052897	ENSG00000166987	99.0582	-0.329865	0.230207	34.4374	-0.27576	NA	72.8773	-0.885444	0.0358039	29.1244	-0.313788	NA	68.4809	-1.1154	0.00430091	30.5232	-0.178188	0.738361
ZBTB1_NM_001123329	ZBTB1	NM_001123329	ENSG00000126804	84.6146	-0.482475	0.128185	78.5408	-0.0800597	0.766461	61.5842	-1.13871	0.0087212	58.0899	-0.46438	0.240998	60.8748	-1.16897	0.00433623	58.0012	-0.443552	0.288772
BCL2_NM_000633	BCL2	NM_000633	ENSG00000171791	101.89	-0.327287	0.251102	145.026	-0.155848	0.5265	74.3302	-0.91094	0.0373483	101.728	-0.755817	0.0356392	69.3717	-1.17828	0.0043429	84.8	-1.52937	2.08222e-05
LINC00167_NR_024233	LINC00167	NR_024233	N/A	90.4515	-0.538703	0.100242	77.3283	-0.365654	0.252952	71.9319	-0.854281	0.0369353	58.1462	-0.766272	0.0570469	66.736	-1.14849	0.00435131	53.9066	-1.03129	0.0147807
MYB_NM_001130172	MYB	NM_001130172	ENSG00000118513	126.797	-0.255068	0.320385	243.623	-0.32428	0.19993	93.8176	-0.756003	0.0602671	175.53	-0.870251	0.00469741	86.4299	-1.04676	0.00435131	162.039	-1.19284	1.8601e-05
CSNK1A1_NM_001271742	CSNK1A1	NM_001271742	ENSG00000113712	89.4276	-0.371153	0.195876	52.6003	0.0384997	NA	70.0805	-0.697128	0.0858793	42.4285	-0.0702377	0.867621	61.5332	-1.15978	0.00437477	39.9254	-0.204286	0.676194
BHLHE40_NM_003670	BHLHE40	NM_003670	ENSG00000134107	53.7039	-0.283122	NA	87.7375	-0.438118	0.196976	38.1199	-0.902175	0.0670908	61.0429	-1.15107	0.00522836	33.6618	-1.4382	0.00437627	59.9901	-1.22034	0.00308644
AMN1_NM_001113402	AMN1	NM_001113402	ENSG00000151743	69.6974	-0.551701	0.106641	65.722	-0.40663	NA	56.0388	-0.82605	0.0612138	50.2632	-0.76816	0.0669284	49.797	-1.27161	0.0043799	45.9014	-1.12064	0.0131262
SNORD105_NR_004381	SNORD105	NR_004381	ENSG00000209645	92.3017	-0.433416	0.145057	54.2834	-0.136527	NA	69.9418	-0.907194	0.0274442	46.0828	-0.126408	0.756301	65.6749	-1.13169	0.0043799	39.0774	-0.557475	0.25267
HIST1H2AJ_NM_021066	HIST1H2AJ	NM_021066	ENSG00000276368	107.642	-0.655682	0.0583325	55.4591	-0.310069	NA	90.1539	-0.802629	0.0385328	52.4831	-0.0566785	0.889075	83.911	-1.04392	0.00438936	53.4918	0.0230644	0.962372
PSMD8_NM_002812	PSMD8	NM_002812	ENSG00000099341	76.4629	-0.425328	0.169187	66.1271	-0.169759	NA	54.8842	-1.10634	0.0139363	54.6179	-0.248759	0.52252	53.0759	-1.23486	0.00440182	47.3098	-0.647098	0.150793
C6orf226_NM_001008739	C6orf226	NM_001008739	ENSG00000221821	82.0568	-0.415514	0.164152	42.9673	-0.10946	NA	60.2214	-0.99813	0.0199543	36.2773	-0.133616	NA	55.9168	-1.25266	0.00444119	30.9503	-0.546118	0.297829
OR9A2_NM_001001658	OR9A2	NM_001001658	ENSG00000179468	38.9088	-0.591526	NA	35.2356	-0.807086	NA	32.0784	-0.832628	0.103145	28.5746	-1.09461	NA	26.9776	-1.56401	0.00444415	29.316	-1.02398	0.0579355
ZBTB8OS_NM_001308135	ZBTB8OS	NM_001308135	ENSG00000176261	80.019	-0.580836	0.0974022	52.9866	-0.160555	NA	60.5052	-1.10001	0.0119665	40.1823	-0.476118	0.27311	59.1447	-1.18319	0.00445126	35.3534	-0.875634	0.0815419
ANAPC15_NM_001278492	ANAPC15	NM_001278492	ENSG00000110200	54.2955	-0.476453	NA	51.0516	-0.0417909	NA	41.0306	-0.969355	0.0490967	38.0304	-0.381134	NA	36.7578	-1.43357	0.00445126	34.647	-0.652774	0.197542
APOA1-AS_NR_126362	APOA1-AS	NR_126362	ENSG00000235910	76.2975	-0.638305	0.0753713	24.7188	0.335446	NA	59.141	-1.09371	0.0119665	17.3362	0.0756502	NA	57.709	-1.17986	0.00445126	18.7484	0.282565	NA
SNORD1C_NR_004397	SNORD1C	NR_004397	ENSG00000274091	65.6025	-0.485828	NA	29.3713	0.00230055	NA	48.5617	-1.06899	0.0189966	24.4578	-0.0299728	NA	46.2583	-1.27352	0.00445126	25.0615	0.0510373	NA
MPEG1_NM_001039396	MPEG1	NM_001039396	ENSG00000197629	75.734	-0.70196	0.065296	73.6979	-0.448433	NA	56.938	-1.31677	0.00322592	52.1351	-1.08758	0.013278	58.59	-1.17647	0.00445199	46.6771	-1.59376	0.000578306
HMX3_NM_001105574	HMX3	NM_001105574	ENSG00000188620	143.974	-0.264517	0.275691	175.108	-0.133826	0.568893	111.202	-0.620689	0.0845582	123.273	-0.704005	0.0314228	100.639	-0.961027	0.00446907	112.329	-1.04847	0.00133913
FGL2_NM_006682	FGL2	NM_006682	ENSG00000127951	89.0878	-0.32149	0.257829	108.102	-0.222384	0.420013	70.3501	-0.619506	0.14976	83.906	-0.493771	0.207589	59.9918	-1.21141	0.00447047	70.4201	-1.11455	0.00456031
ELP3_NM_001284220	ELP3	NM_001284220	ENSG00000134014	89.121	-0.463634	0.13069	61.9688	-0.346314	NA	68.3526	-0.901396	0.0286787	50.9976	-0.469515	0.245703	63.8096	-1.14078	0.00451174	44.5732	-0.899939	0.0488721
KHNYN_NM_001290257	KHNYN	NM_001290257	ENSG00000100441	62.208	-0.709578	NA	60.4551	-0.221401	NA	50.1908	-1.02408	0.0234313	46.966	-0.483547	0.242702	47.1003	-1.26635	0.00452487	41.0156	-0.894506	0.0610268
RNF14_NM_004290	RNF14	NM_004290	ENSG00000013561	53.5143	-0.627651	NA	52.903	-0.562315	NA	43.8078	-0.895786	0.0629537	44.9176	-0.62393	0.141597	39.1254	-1.34815	0.00452487	39.3072	-1.0641	0.0271296
FOXJ3_NM_001198851	FOXJ3	NM_001198851	ENSG00000198815	74.6399	-0.272167	0.337819	116.766	-0.311244	0.287145	55.623	-0.757477	0.0812293	80.4162	-1.03069	0.00774472	48.8936	-1.24161	0.00457009	75.162	-1.31648	0.000522176
SLC22A15_NM_018420	SLC22A15	NM_018420	ENSG00000163393	72.013	-0.47219	0.140877	115.692	-0.560021	0.092804	53.663	-1.0093	0.0312252	80.6897	-1.34168	0.000292379	50.4939	-1.24208	0.00459512	76.6324	-1.60308	1.08808e-05
ZNF74_NM_001256523	ZNF74	NM_001256523	ENSG00000185252	61.0482	-0.611658	NA	49.4231	-0.463785	NA	51.7103	-0.74981	0.111379	40.6377	-0.606606	0.163884	44.4052	-1.3229	0.00461557	35.7579	-1.02788	0.0418254
LOC105378732_NR_131923	LOC105378732	NR_131923	ENSG00000225675	58.2423	-0.377275	NA	27.9169	0.160761	NA	43.6453	-0.861662	0.0659153	22.4156	0.100378	NA	38.132	-1.38029	0.0046259	17.4137	-0.454454	NA
C19orf12_NM_001256047	C19orf12	NM_001256047	ENSG00000131943	84.3237	-0.492596	0.121812	99.7116	-0.28089	0.331303	63.3769	-1.01911	0.017638	74.4136	-0.698224	0.0717029	60.9888	-1.15995	0.00467733	67.0808	-1.08745	0.00629861
ZHX2_NM_014943	ZHX2	NM_014943	ENSG00000178764	107.623	-0.31142	0.242754	65.7412	-0.249491	NA	79.8346	-0.830035	0.0353098	44.4356	-0.978501	0.0273066	74.5725	-1.06367	0.00467733	41.5373	-1.26084	0.0064021
CDK5RAP2_NM_001011649	CDK5RAP2	NM_001011649	ENSG00000136861	80.8056	-0.449441	0.149975	33.842	-0.347052	NA	64.387	-0.738571	0.0975347	35.9881	0.141559	NA	56.46	-1.21488	0.00467733	29.6209	-0.316172	0.561449
AKR1A1_NM_001202413	AKR1A1	NM_001202413	ENSG00000117448	56.41	-0.432048	NA	45.787	-0.337658	NA	42.4998	-0.960162	0.0451512	35.534	-0.632804	NA	38.5299	-1.37987	0.00468877	34.7807	-0.696384	0.16224
TK2_NM_001272050	TK2	NM_001272050	ENSG00000166548	95.4156	-0.427583	0.156048	101.03	-0.352268	0.240791	71.7403	-0.914484	0.0265731	73.4461	-0.874037	0.0229659	68.1434	-1.11026	0.00468877	61.5392	-1.66924	2.70757e-05
PLA2G6_NM_001004426	PLA2G6	NM_001004426	ENSG00000184381	42.3747	-0.2796	NA	90.7233	-0.721993	0.055684	30.5242	-0.842221	0.102527	67.539	-1.27293	0.00128921	25.7489	-1.56888	0.00468877	59.7374	-1.96366	1.25482e-06
SLC16A6_NM_001174166	SLC16A6	NM_001174166	ENSG00000108932	42.6895	-0.575114	NA	37.7156	0.0131056	NA	37.074	-0.630856	0.190286	30.2467	-0.101568	NA	29.7465	-1.47998	0.00470285	27.3163	-0.33813	0.545073
ATRN_NM_001207047	ATRN	NM_001207047	ENSG00000088812	83.0969	-0.66466	0.0634966	83.1259	-0.339783	0.273597	64.1273	-1.13387	0.00751446	63.2986	-0.695436	0.0747125	63.9295	-1.12994	0.00470285	59.9439	-0.868506	0.0336354
FOS_NM_005252	FOS	NM_005252	ENSG00000170345	80.6147	-0.428468	0.156048	72.9293	0.1118	NA	63.7224	-0.739463	0.0765733	55.857	-0.111746	0.77827	56.5925	-1.17157	0.00476209	50.5812	-0.376426	0.399541
CCNYL1_NM_001142300	CCNYL1	NM_001142300	ENSG00000163249	45.6609	-0.531579	NA	28.235	-0.186998	NA	35.8474	-0.91078	0.067351	23.6232	-0.245638	NA	31.5099	-1.45675	0.00476209	23.8993	-0.183118	NA
CREBL2_NM_001310	CREBL2	NM_001310	ENSG00000111269	62.4922	-0.316294	NA	49.506	-0.187988	NA	43.1519	-1.08662	0.0282714	38.1289	-0.466273	NA	40.4776	-1.37128	0.00478165	33.6314	-0.857918	0.0907811
UBAC2_NM_177967	UBAC2	NM_177967	ENSG00000134882	83.9911	-0.232374	0.397636	51.2058	-0.41008	NA	63.7196	-0.644118	0.135177	42.7166	-0.517902	0.226823	54.4557	-1.23131	0.00478165	40.3614	-0.67431	0.157882
YTHDF2_NM_001172828	YTHDF2	NM_001172828	ENSG00000198492	80.8979	-0.467647	0.141178	67.3338	-0.318899	NA	63.1955	-0.841415	0.0543384	54.1242	-0.491163	0.216115	57.4423	-1.20355	0.00478831	49.4017	-0.784216	0.07526
TMEM143_NM_001303538	TMEM143	NM_001303538	ENSG00000161558	83.3522	-0.377727	0.207057	48.2318	-0.35979	NA	68.7296	-0.533044	0.190087	43.6535	-0.221588	0.594722	57.6064	-1.16351	0.00479948	36.5696	-0.744742	0.141154
MICU2_NM_152726	MICU2	NM_152726	ENSG00000165487	44.0093	-0.695801	NA	53.7314	-0.142826	NA	37.427	-0.824256	0.0937606	42.3132	-0.346845	0.414263	32.2365	-1.45606	0.00480232	39.5188	-0.525769	0.275411
MIR3190_NR_036158	MIR3190	NR_036158	ENSG00000265134	119.039	-0.413043	0.139291	188.717	-0.525841	0.0849264	88.893	-0.92382	0.0169628	142.083	-0.965129	0.0028075	85.3471	-1.04479	0.00480232	130.552	-1.30239	3.30638e-05
STAG2_NM_001282418	STAG2	NM_001282418	ENSG00000101972	75.267	-0.382754	0.204287	64.6927	-0.323906	NA	60.4288	-0.631463	0.136591	50.4353	-0.60008	0.152802	51.2175	-1.25838	0.00482562	46.8364	-0.847213	0.0618716
BMP8B_NM_001720	BMP8B	NM_001720	ENSG00000116985	68.8294	-0.371101	0.220785	17.7086	-0.202768	NA	49.7463	-0.985533	0.0300252	13.7638	-0.425385	NA	46.3617	-1.26636	0.00483549	12.4681	-0.657631	NA
FBXW4_NM_022039	FBXW4	NM_022039	ENSG00000107829	74.5707	-0.591207	0.0929107	87.5015	-0.44091	0.173282	57.7153	-1.01809	0.0198819	68.4496	-0.73114	0.0567257	55.3723	-1.1814	0.00483899	65.6449	-0.879381	0.0284321
LDLRAD4_NM_001276249	LDLRAD4	NM_001276249	ENSG00000168675	82.6345	-0.462528	0.142579	100.14	-0.55759	0.10138	58.3693	-1.23565	0.00571944	66.2435	-1.59057	6.22782e-05	57.8747	-1.23142	0.00485094	72.2222	-1.19349	0.00159757
ZNF565_NM_001042474	ZNF565	NM_001042474	ENSG00000196357	91.0605	-0.35564	0.207966	45.3063	-0.278143	NA	71.0405	-0.702111	0.0851738	42.5932	-0.0562153	0.89364	63.1423	-1.12336	0.00488259	40.8263	-0.142079	0.770836
CCDC125_NM_176816	CCDC125	NM_176816	ENSG00000183323	53.0671	-0.65625	NA	43.8162	-0.118687	NA	44.9626	-0.792676	0.0892545	34.1749	-0.348154	NA	39.0231	-1.34154	0.00489293	35.4055	-0.245837	0.635908
GLRX_NM_001118890	GLRX	NM_001118890	ENSG00000173221	63.6695	-0.523309	NA	41.9429	-0.496436	NA	54.2744	-0.620472	0.174417	35.6441	-0.551327	NA	44.8855	-1.33606	0.00489293	27.7663	-1.4935	0.0051009
CDKN1A_NM_078467	CDKN1A	NM_078467	ENSG00000124762	63.4495	-0.463144	NA	81.0815	-0.817723	0.0437065	47.4302	-0.998172	0.0295077	61.2443	-1.33423	0.00121038	44.3416	-1.28067	0.00491045	59.908	-1.47075	0.000263782
CREB3L4_NM_001255978	CREB3L4	NM_001255978	ENSG00000143578	82.8926	-0.511833	0.115527	51.9439	-0.375448	NA	64.5385	-0.90284	0.0366656	35.2722	-1.12993	NA	60.2183	-1.16969	0.00491237	38.0303	-0.870606	0.0706036
CAMTA2_NM_001171167	CAMTA2	NM_001171167	ENSG00000108509	55.5781	-0.366561	NA	51.4243	-0.242385	NA	43.9413	-0.669397	0.149159	40.4795	-0.462469	0.287108	36.3791	-1.38304	0.00491237	35.1047	-0.938508	0.0654854
DGKZ_NM_201533	DGKZ	NM_201533	ENSG00000149091	60.7279	-0.664678	NA	74.8005	-0.365075	NA	50.1651	-0.893479	0.0471068	55.875	-0.779278	0.0573652	45.2766	-1.28061	0.00496309	55.0327	-0.83294	0.0503885
DPY19L3_NM_207325	DPY19L3	NM_207325	ENSG00000178904	80.6561	-0.466188	0.135121	46.3576	-0.0823197	NA	57.9368	-1.15954	0.00752451	32.1008	-0.615364	NA	57.5733	-1.18056	0.0049758	34.4073	-0.391604	0.437543
STXBP2_NM_001127396	STXBP2	NM_001127396	ENSG00000076944	71.2142	-0.544683	0.107485	83.3384	-0.501349	0.13943	58.252	-0.745703	0.0901851	68.699	-0.616659	0.100779	51.6416	-1.20748	0.00497737	63.716	-0.829353	0.0520094
ODC1_NM_001287188	ODC1	NM_001287188	ENSG00000115758	59.9982	-0.448707	NA	60.656	-0.0735271	NA	50.084	-0.595606	0.182356	42.6367	-0.586578	0.17549	41.1554	-1.3187	0.00498951	44.2079	-0.451554	0.342506
ZZEF1_NM_015113	ZZEF1	NM_015113	ENSG00000074755	47.5069	-0.491526	NA	36.897	0.317771	NA	40.7966	-0.578323	0.231846	25.6882	-0.0209554	NA	32.0708	-1.50981	0.00500895	24.9944	-0.0576543	NA
RAB27A_NM_183236	RAB27A	NM_183236	ENSG00000069974	67.2984	-0.352436	NA	78.9512	-0.467692	0.179989	44.1938	-1.35834	0.00395781	56.8396	-1.09034	0.0148736	45.0381	-1.28554	0.00501072	50.1783	-1.71111	0.000100371
CBX3_NM_007276	CBX3	NM_007276	ENSG00000122565	91.6261	-0.396627	0.178471	66.6872	-0.517312	NA	79.3226	-0.398962	0.308312	58.1808	-0.474992	0.22384	64.4244	-1.11539	0.00502705	50.2664	-0.964404	0.0270178
TMF1_NM_007114	TMF1	NM_007114	ENSG00000144747	47.0207	-0.659393	NA	50.4095	-0.222455	NA	39.6572	-0.820419	0.0975905	39.2875	-0.46645	0.279009	34.1341	-1.41724	0.00504214	38.3269	-0.516146	0.295193
TMEM216_NM_016499	TMEM216	NM_016499	ENSG00000187049	64.4231	-0.366602	NA	59.1277	-0.502081	NA	47.1103	-0.943819	0.0403206	46.1972	-0.821818	0.0564404	42.8986	-1.30619	0.00507264	45.1804	-0.892875	0.049534
LINC01353_NR_117097	LINC01353	NR_117097	ENSG00000231507	71.6674	-0.51536	0.121992	83.1258	-0.664232	0.0832484	59.5439	-0.669069	0.116565	64.3387	-1.01094	0.014457	51.3715	-1.23593	0.00509746	56.1417	-1.67671	5.11804e-05
PPM1A_NM_021003	PPM1A	NM_021003	ENSG00000100614	78.074	-0.42922	0.156931	20.8627	-0.0246311	NA	50.6857	-1.56113	0.000619981	16.2378	-0.209572	NA	53.9107	-1.27625	0.00511006	20.2925	0.294269	NA
ITGA5_NM_002205	ITGA5	NM_002205	ENSG00000161638	66.9379	-0.715132	NA	76.7823	-0.52419	0.13943	52.5722	-1.13417	0.0114089	58.7375	-0.906482	0.0285064	49.951	-1.29294	0.00511501	56.8334	-1.00268	0.0194883
ZNF689_NR_104166	ZNF689	NR_104166	ENSG00000156853	87.6575	-0.462199	0.134033	70.0067	-0.231082	NA	63.7969	-1.09002	0.0100203	55.2221	-0.433849	0.277001	62.0677	-1.16254	0.00511501	51.0008	-0.67214	0.129263
SON_NM_001291411	SON	NM_001291411	ENSG00000159140	77.2281	-0.457193	0.144794	68.6859	-0.328284	NA	59.9493	-0.858615	0.0475691	59.7959	-0.303129	0.429206	54.9618	-1.18764	0.00511501	50.6859	-0.800967	0.0666338
APBB1_NM_001164	APBB1	NM_001164	ENSG00000166313	55.8794	-0.182978	NA	52.4995	-0.556491	NA	40.3755	-0.713663	0.132299	39.5351	-0.991316	0.0318906	33.8158	-1.39996	0.00513676	38.4257	-1.12865	0.0193322
SFT2D1_NM_145169	SFT2D1	NM_145169	ENSG00000198818	72.9547	-0.247603	0.386286	47.588	-0.415236	NA	51.905	-0.875654	0.0510529	39.7673	-0.492647	0.253758	47.0086	-1.25111	0.00513676	35.543	-0.862979	0.0798598
CIZ1_NM_001257975	CIZ1	NM_001257975	ENSG00000148337	66.3311	-0.322693	NA	69.003	-0.348045	NA	53.5579	-0.55123	0.205755	56.2016	-0.497857	0.208074	43.575	-1.28853	0.00514907	48.8998	-0.934379	0.0364563
UGCG_NM_003358	UGCG	NM_003358	ENSG00000148154	108.494	-0.258192	0.320715	130.444	-0.27466	0.308142	76.0455	-0.960702	0.0173952	97.4452	-0.684263	0.0500947	73.5863	-1.07274	0.00514915	88.4557	-1.03788	0.00338665
XLOC_008559_NR_131214	XLOC	NR_131214	N/A	50.6485	-0.320183	NA	75.4213	-0.736433	0.0668046	35.6603	-1.00534	0.0444692	57.9163	-1.16271	0.00529216	32.2684	-1.43072	0.00514931	53.6457	-1.53897	0.000265901
PAAF1_NM_001267803	PAAF1	NM_001267803	ENSG00000175575	56.4981	-0.680897	NA	32.5925	-0.389455	NA	44.1779	-1.1263	0.0169628	24.9461	-0.733238	NA	42.6099	-1.29325	0.00514931	24.5553	-0.766394	NA
LRRC75A-AS1_NR_027158	LRRC75A-AS1	NR_027158	ENSG00000175061	52.201	-0.369313	NA	73.6445	-0.508378	NA	35.7471	-1.20137	0.0163712	58.9345	-0.724214	0.0709542	34.3071	-1.39982	0.00514931	59.6024	-0.673024	0.10581
GOLGA4_NM_001172713	GOLGA4	NM_001172713	ENSG00000144674	57.5901	-0.521457	NA	53.3663	-0.288022	NA	45.2862	-0.894006	0.0535506	37.2278	-0.890116	NA	40.8365	-1.31007	0.00514931	38.4574	-0.806916	0.0938717
MIRLET7I_NR_029661	MIRLET7I	NR_029661	ENSG00000199179	91.0839	-0.429704	0.158542	44.4887	0.176827	NA	71.7904	-0.74769	0.0709368	31.9185	-0.172983	NA	64.5958	-1.13463	0.00515427	35.127	0.0965162	0.852824
HNMT_NM_001024074	HNMT	NM_001024074	ENSG00000150540	69.2762	-0.396472	0.204273	99.5726	-0.298375	0.405398	55.9703	-0.652321	0.136885	78.9047	-0.481002	0.361542	47.531	-1.25855	0.00515427	67.4211	-1.21533	0.00484313
MIATNB_NR_110543	MIATNB	NR_110543	ENSG00000244625	57.0346	-0.649376	NA	48.6237	-0.352459	NA	44.704	-1.08547	0.0243044	39.2743	-0.520674	0.234839	42.301	-1.33157	0.00515427	38.1847	-0.616829	0.200528
CRELD1_NM_001031717	CRELD1	NM_001031717	ENSG00000163703	39.571	-0.544355	NA	41.6551	-0.298439	NA	29.8687	-1.06318	0.0421011	35.0186	-0.348867	NA	27.0402	-1.5202	0.00515427	35.4024	-0.321121	0.527094
SP140L_NM_138402	SP140L	NM_138402	ENSG00000185404	58.4731	-0.333592	NA	41.7281	0.0212506	NA	43.6237	-0.833085	0.0833992	29.7879	-0.386093	NA	38.0084	-1.38129	0.00515579	27.1547	-0.658101	NA
SP140L_NM_001308162	SP140L	NM_001308162	ENSG00000185404	58.4731	-0.333592	NA	41.7281	0.0212506	NA	43.6237	-0.833085	0.0833992	29.7879	-0.386093	NA	38.0084	-1.38129	0.00515579	27.1547	-0.658101	NA
CDKN2D_NM_001800	CDKN2D	NM_001800	ENSG00000129355	102.559	-0.358933	0.198619	62.8921	-0.0242629	NA	79.91	-0.710241	0.0750275	47.2905	-0.30842	0.452965	71.9481	-1.07903	0.00515878	43.9438	-0.513179	0.265675
CISH_NM_013324	CISH	NM_013324	ENSG00000114737	68.6093	-0.341755	NA	100.287	-0.133909	0.616316	46.3656	-1.21845	0.00913885	64.7107	-0.983579	0.0148736	46.1059	-1.24823	0.00517238	59.389	-1.37284	0.000772192
FNDC3B_NM_001135095	FNDC3B	NM_001135095	ENSG00000075420	77.0115	-0.467062	0.143686	69.4546	-0.395438	NA	57.3524	-1.02523	0.0206867	55.1535	-0.643212	0.113261	54.8889	-1.19613	0.00517238	51.0882	-0.913611	0.0391239
ZYX_NM_001010972	ZYX	NM_001010972	ENSG00000159840	60.9683	-0.637049	NA	66.7137	-0.0123377	NA	44.8712	-1.30499	0.00526842	41.0085	-0.93968	0.0374379	45.0814	-1.26797	0.00517238	43.4158	-0.722175	0.133034
LINC00896_NR_026919	LINC00896	NR_026919	ENSG00000236499	44.5879	-0.536126	NA	37.7888	-0.413762	NA	35.3758	-0.899626	0.0746281	29.9664	-0.694158	NA	30.7723	-1.47491	0.0051992	30.6704	-0.645223	0.231715
CEBPA_NM_001285829	CEBPA	NM_001285829	ENSG00000245848	102.989	-0.30318	0.270766	80.5636	0.166705	0.548013	77.2976	-0.760363	0.0595013	57.6942	-0.235164	0.538056	70.0102	-1.10403	0.00521792	56.2831	-0.263803	0.54749
PREX1_NM_020820	PREX1	NM_020820	ENSG00000124126	87.7103	-0.212455	0.431512	91.0646	-0.249606	0.380825	62.775	-0.814731	0.0556378	60.7908	-1.04591	0.0103536	57.2065	-1.16131	0.00522555	58.6777	-1.20103	0.00313496
REV3L_NM_001286431	REV3L	NM_001286431	ENSG00000009413	63.4823	-0.480798	NA	58.2938	-0.297487	NA	53.355	-0.614599	0.182406	41.0551	-0.886267	0.0540492	44.3535	-1.29553	0.0052524	38.2568	-1.16379	0.0148853
STOM_NM_001270526	STOM	NM_001270526	ENSG00000148175	81.2028	-0.55915	0.100076	50.7701	-0.192078	NA	65.3873	-0.841599	0.0471068	35.9484	-0.675702	NA	60.2209	-1.14357	0.0052524	38.3631	-0.497593	0.307692
KLF6_NM_001160124	KLF6	NM_001160124	ENSG00000067082	73.4848	-0.407403	0.190287	70.0428	-0.343078	NA	53.4452	-1.01922	0.022844	53.7343	-0.674271	0.0978507	50.6786	-1.21064	0.00528106	54.2658	-0.644563	0.142122
SGTA_NM_003021	SGTA	NM_003021	ENSG00000104969	82.2582	-0.693523	0.0583325	53.379	0.179805	NA	70.2919	-0.782556	0.0553317	42.165	0.0604373	0.886703	64.117	-1.10714	0.00528106	36.2589	-0.2941	0.558212
PDE4A_NM_001111307	PDE4A	NM_001111307	ENSG00000065989	89.2684	-0.487591	0.121812	57.2233	0.028623	NA	69.7496	-0.831052	0.0529287	46.3014	-0.0567558	0.894924	63.8398	-1.15794	0.00528106	39.7187	-0.466736	0.344516
PARP14_NM_017554	PARP14	NM_017554	ENSG00000173193	70.3465	-0.5593	0.106641	49.2847	-0.358479	NA	54.0236	-1.0228	0.0222656	36.6287	-0.77496	NA	51.4028	-1.22359	0.00528106	35.981	-0.872855	0.0761463
ZFYVE26_NM_015346	ZFYVE26	NM_015346	ENSG00000072121	49.8138	-0.625408	NA	34.1884	0.00941372	NA	40.9507	-0.876329	0.0750729	27.5781	-0.0892533	NA	36.2967	-1.36162	0.00530836	25.4245	-0.275741	NA
ST3GAL4-AS1_NR_033839	ST3GAL4-AS1	NR_033839	ENSG00000280832	73.2974	-0.361853	0.228809	114.259	-0.515925	0.11104	48.1589	-1.38013	0.00302929	83.197	-1.08511	0.00332695	48.8328	-1.27679	0.0053086	72.1674	-1.80822	1.89486e-06
C16orf74_NM_206967	C16orf74	NM_206967	ENSG00000154102	72.3457	-0.265039	0.367963	67.4488	-0.456685	NA	52.7558	-0.803481	0.0685368	47.3565	-1.14269	0.0101598	47.1406	-1.23596	0.00532039	47.3394	-1.14068	0.00995164
ENG_NM_000118	ENG	NM_000118	ENSG00000106991	52.6034	-0.668982	NA	98.3636	-0.613969	0.0924988	43.4313	-0.878678	0.0661322	71.6654	-1.20007	0.00253045	38.9209	-1.33429	0.00532499	69.1291	-1.34814	0.000793358
BLOC1S6_NR_132356	BLOC1S6	NR_132356	ENSG00000104164	73.3206	-0.672704	0.0656974	33.2991	-0.0342281	NA	68.6041	-0.476488	0.237814	28.9405	0.0302032	NA	56.469	-1.15445	0.00533397	24.5964	-0.361611	NA
CTSD_NM_001909	CTSD	NM_001909	ENSG00000117984	40.7584	-0.518262	NA	39.0392	-0.383121	NA	34.8512	-0.635636	0.200493	34.3459	-0.337618	NA	27.9016	-1.49263	0.00538035	30.4142	-0.682621	0.190707
CD63_NM_001257391	CD63	NM_001257391	ENSG00000135404	57.2472	-0.459378	NA	52.6403	0.0280691	NA	46.7728	-0.667537	0.141968	38.8955	-0.276812	0.519463	39.3614	-1.31644	0.00548749	37.4571	-0.38211	0.433368
ZNF438_NM_001143766	ZNF438	NM_001143766	ENSG00000183621	69.0102	-0.511828	0.122903	81.7124	-0.898662	0.0389056	47.6061	-1.41537	0.00262852	62.1469	-1.42982	0.000478157	49.3155	-1.23076	0.00550507	59.8835	-1.65485	9.98772e-05
LTB4R_NM_001143919	LTB4R	NM_001143919	ENSG00000213903	64.9067	-0.66158	NA	117.134	-0.5736	0.0924988	51.0985	-1.04554	0.0245346	82.9536	-1.28836	0.000494097	48.709	-1.24634	0.00553261	85.0027	-1.17294	0.000883142
RNF14_NM_183401	RNF14	NM_183401	ENSG00000013561	54.0793	-0.699865	NA	46.3315	-0.469942	NA	43.1893	-1.09311	0.0215179	40.9922	-0.405779	0.340274	41.1447	-1.29231	0.00553261	35.4279	-0.826541	0.100606
ANAPC15_NM_001278491	ANAPC15	NM_001278491	ENSG00000110200	54.7247	-0.455122	NA	49.886	-0.0744511	NA	42.2154	-0.86802	0.0746401	37.5101	-0.394988	NA	37.0147	-1.39715	0.00553496	34.1089	-0.673954	0.18621
SLCO4A1_NM_016354	SLCO4A1	NM_016354	ENSG00000101187	65.3586	-0.317058	NA	43.4679	-0.457882	NA	46.208	-0.982285	0.0347057	36.9059	-0.504479	NA	41.6171	-1.36747	0.00553496	34.09	-0.768361	0.133491
RPS12_NM_001016	RPS12	NM_001016	ENSG00000112306	80.8822	-0.385947	0.20353	43.398	-0.101254	NA	63.3919	-0.721569	0.114909	32.6194	-0.418676	NA	55.7088	-1.21641	0.00555659	34.4205	-0.266015	0.599491
CRELD1_NM_015513	CRELD1	NM_015513	ENSG00000163703	39.049	-0.553733	NA	41.6551	-0.298439	NA	29.0887	-1.12734	NA	35.0186	-0.348867	NA	26.8559	-1.50891	0.00557496	35.4024	-0.321121	0.527094
SNX5_NM_014426	SNX5	NM_014426	ENSG00000089006	87.1816	-0.377662	0.192376	112.083	-0.24199	0.373383	73.6701	-0.459968	0.243623	74.3988	-1.06243	0.00547009	60.9784	-1.12389	0.00557505	74.2484	-1.05939	0.00469744
ARHGEF1_NM_004706	ARHGEF1	NM_004706	ENSG00000076928	83.951	-0.519959	0.108759	113.71	-0.700427	0.0534516	59.9324	-1.24333	0.00421935	92.5311	-0.870738	0.0162656	61.779	-1.10982	0.00571136	85.85	-1.13293	0.00271979
FDFT1_NM_001287747	FDFT1	NM_001287747	ENSG00000079459	123.147	-0.616692	0.0601528	105.709	-0.31523	0.289953	94.4536	-1.0864	0.00386218	75.3904	-0.893032	0.0222655	81.7195	-1.56311	0.00571533	69.8954	-1.17008	0.00414803
PIGZ_NM_025163	PIGZ	NM_025163	ENSG00000119227	89.781	-0.509887	0.107996	54.2746	0.154922	NA	65.1987	-1.16399	0.0056151	37.4201	-0.331213	NA	66.1056	-1.08587	0.0057277	35.6483	-0.445237	0.369264
PTBP2_NR_125356	PTBP2	NR_125356	ENSG00000117569	58.1722	-0.50962	NA	32.7516	-0.24851	NA	46.7634	-0.800102	0.0827421	32.7391	0.0811753	NA	41.1655	-1.29045	0.00573566	26.6663	-0.383068	NA
MYO1C_NM_001080950	MYO1C	NM_001080950	ENSG00000197879	50.033	-0.416844	NA	40.2621	0.0268239	NA	34.8988	-1.13949	0.0338506	26.4734	-0.576843	NA	33.4684	-1.39795	0.00573566	30.5124	-0.199723	0.711086
SMAP1_NM_001044305	SMAP1	NM_001044305	ENSG00000112305	44.8139	-0.417002	NA	35.4338	-0.516162	NA	34.2584	-0.877387	0.0833992	32.9964	-0.331586	NA	29.706	-1.46621	0.00573566	29.2568	-0.689871	0.196555
NFE2L1_NM_003204	NFE2L1	NM_003204	ENSG00000082641	66.0059	-0.595893	NA	47.2166	-0.0698665	NA	53.1842	-0.88079	0.0462695	40.0321	-0.0633651	0.881393	48.8419	-1.21416	0.00575862	33.5325	-0.515162	0.314319
CLHC1_NM_001135598	CLHC1	NM_001135598	ENSG00000162994	66.0311	-0.593329	NA	47.0487	-0.228289	NA	48.8319	-1.21857	0.00835984	41.3548	-0.145404	0.729592	48.5977	-1.22995	0.00576314	29.0634	-1.29767	0.0136854
WNT10B_NM_003394	WNT10B	NM_003394	ENSG00000169884	62.0239	-0.493571	NA	74.5975	-0.425197	NA	52.3544	-0.598879	0.177568	56.454	-0.826667	0.0465572	43.3808	-1.2856	0.00576999	55.6138	-0.865017	0.0403322
ZNF284_NM_001037813	ZNF284	NM_001037813	ENSG00000186026	69.2192	-0.535484	0.116911	58.0706	-0.296193	NA	56.2508	-0.788092	0.0775635	50.3904	-0.260212	0.514391	49.8789	-1.23805	0.00576999	44.4895	-0.606561	0.188573
ROCK2_NM_004850	ROCK2	NM_004850	ENSG00000134318	74.3176	-0.392661	0.197128	45.1731	-0.0741656	NA	59.067	-0.683688	0.115965	33.9686	-0.359824	NA	51.2607	-1.21288	0.00576999	31.8805	-0.54298	0.295949
FLJ32255_NR_104643	FLJ32255	NR_104643	N/A	95.5024	-0.439642	0.154769	107.367	-0.380287	0.211186	73.5348	-0.852458	0.0553317	82.2437	-0.720682	0.0605823	68.0317	-1.142	0.00584281	73.79	-1.11759	0.00313252
PLEC_NM_201380	PLEC	NM_201380	ENSG00000178209	82.2684	-0.581189	0.0941067	74.1053	-0.240249	NA	63.8685	-0.997981	0.0200619	57.2498	-0.505386	0.210342	61.2149	-1.14227	0.00585439	53.8685	-0.696601	0.111651
RORA-AS1_NR_120339	RORA-AS1	NR_120339	ENSG00000245534	67.3097	-0.276919	NA	45.1384	-0.318806	NA	48.2814	-0.887381	0.0508268	35.9288	-0.530266	NA	43.8799	-1.27642	0.00586755	33.2384	-0.798183	0.133076
THBS4_NM_001306212	THBS4	NM_001306212	ENSG00000113296	60.4592	-0.325038	NA	41.3474	-0.44529	NA	40.1661	-1.25583	0.0102375	33.8924	-0.611323	NA	39.6574	-1.32531	0.00586755	33.951	-0.570984	0.273821
FMNL1_NM_005892	FMNL1	NM_005892	ENSG00000184922	48.1315	-0.35857	NA	59.1395	-0.262452	NA	37.3284	-0.705701	0.149656	42.3728	-0.776097	0.0815209	31.1096	-1.42767	0.00588247	41.9756	-0.785133	0.108427
PRICKLE1_NM_153026	PRICKLE1	NM_153026	ENSG00000139174	73.2248	-0.559346	0.107644	49.3332	-0.28677	NA	58.5794	-0.88511	0.0524735	44.5939	-0.159682	0.704999	53.957	-1.20629	0.00590298	38.3356	-0.588966	0.242913
SLC7A5_NM_003486	SLC7A5	NM_003486	ENSG00000103257	58.6481	-0.622685	NA	45.8334	-0.221319	NA	40.7694	-1.4973	0.00288173	28.212	-1.17581	NA	42.1092	-1.3412	0.00593108	32.9494	-0.694037	0.184264
TAF13_NM_005645	TAF13	NM_005645	ENSG00000197780	58.6874	-0.373812	NA	23.8402	0.178741	NA	48.1371	-0.570059	0.20332	18.8941	0.10426	NA	39.5252	-1.30315	0.00593638	18.431	0.0661267	NA
S100PBP_NM_022753	S100PBP	NM_022753	ENSG00000116497	60.7779	-0.5108	NA	63.4127	-0.104023	NA	48.234	-0.848658	0.0620168	47.0525	-0.472305	0.254638	43.4003	-1.25761	0.00600584	38.9114	-1.11008	0.0206954
FAM83H-AS1_NR_033849	FAM83H-AS1	NR_033849	ENSG00000203499	42.3707	-0.73926	NA	35.8063	0.187107	NA	35.0363	-0.98741	0.0478696	29.1403	0.137804	NA	31.5309	-1.41717	0.00601081	25.8246	-0.0934297	NA
TMEM173_NM_001301738	TMEM173	NM_001301738	ENSG00000184584	78.2696	-0.318869	0.273771	82.3228	-0.318266	0.301986	56.8094	-0.905432	0.0404591	63.0083	-0.647361	0.0953478	51.8891	-1.2323	0.00602663	58.7104	-0.848014	0.050794
CHRM3-AS2_NR_103776	CHRM3-AS2	NR_103776	ENSG00000233355	42.9208	-0.51106	NA	23.7392	-0.293992	NA	31.7886	-1.08787	0.0405092	22.0555	-0.138427	NA	29.3576	-1.45207	0.0060284	20.1029	-0.373847	NA
XBP1_NM_001079539	XBP1	NM_001079539	ENSG00000100219	146.707	-0.31135	0.239079	158.966	-0.269754	0.307371	106.699	-0.900417	0.0211032	107.065	-1.06158	0.0022386	89.6952	-1.50505	0.00603334	104.187	-1.16609	0.00040312
USP3_NM_001256702	USP3	NM_001256702	ENSG00000140455	98.1312	-0.339192	0.220199	87.2974	-0.167674	0.547964	78.6418	-0.582273	0.137771	66.1076	-0.487503	0.195411	68.4329	-1.06624	0.00605862	61.4939	-0.684275	0.103926
GMNN_NM_001251991	GMNN	NM_001251991	ENSG00000112312	46.9489	-0.452899	NA	40.822	-0.192975	NA	35.9989	-0.854149	0.093274	36.272	-0.102148	NA	31.5517	-1.41586	0.0060636	35.8328	-0.0939481	0.860575
KCTD21-AS1_NR_102280	KCTD21-AS1	NR_102280	ENSG00000246174	72.1239	-0.446666	0.152724	43.4533	-0.193778	NA	50.8745	-1.207	0.00955128	36.205	-0.272853	NA	50.4334	-1.2124	0.00610357	29.9404	-0.811107	0.134152
NCF4_NM_000631	NCF4	NM_000631	ENSG00000100365	70.0469	-0.271354	0.349223	126.976	-0.446128	0.148424	52.6656	-0.710931	0.111498	86.7017	-1.26959	0.000899055	45.6245	-1.23701	0.00610732	83.3091	-1.45552	6.27306e-05
SKIDA1_NM_207371	SKIDA1	NM_207371	ENSG00000180592	88.9781	-0.626004	0.0690665	101.907	-0.549916	0.105725	73.1723	-0.832285	0.039504	82.7161	-0.727038	0.053731	68.5249	-1.06318	0.00613562	68.5969	-1.49983	9.29772e-05
CD52_NM_001803	CD52	NM_001803	ENSG00000169442	81.7249	-0.340097	0.242172	79.941	-0.707011	0.0732995	60.836	-0.838559	0.049688	62.1499	-1.06977	0.0084352	55.8725	-1.16158	0.00614926	57.2569	-1.4584	0.000344875
ZNF362_NM_152493	ZNF362	NM_152493	ENSG00000160094	48.6352	-0.363481	NA	88.8376	-0.339001	0.293252	37.8385	-0.721332	0.138141	68.1385	-0.669507	0.0997043	31.6946	-1.40356	0.00614926	64.4986	-0.857478	0.0418882
EIF3K_NM_001308393	EIF3K	NM_001308393	ENSG00000178982	79.3056	-0.604103	0.0801715	47.9701	-0.0680359	NA	62.1808	-1.00248	0.0208835	37.1634	-0.299985	NA	59.74	-1.1308	0.00614926	37.3621	-0.237424	0.639082
EIF3K_NM_001300992	EIF3K	NM_001300992	ENSG00000178982	79.3056	-0.604103	0.0801715	47.9701	-0.0680359	NA	62.1808	-1.00248	0.0208835	37.1634	-0.299985	NA	59.74	-1.1308	0.00614926	37.3621	-0.237424	0.639082
ABTB1_NM_032548	ABTB1	NM_032548	ENSG00000114626	59.1328	-0.451372	NA	29.3	0.328868	NA	47.4047	-0.72484	0.111106	20.8254	0.0746086	NA	40.6637	-1.29669	0.00614926	24.8823	0.466585	NA
CCDC125_NM_001297696	CCDC125	NM_001297696	ENSG00000183323	48.2921	-0.57094	NA	46.2802	-0.20356	NA	41.3847	-0.668504	0.158359	36.1067	-0.448901	NA	34.3598	-1.37115	0.00614939	35.8896	-0.465378	0.360256
PRDM2_NM_001135610	PRDM2	NM_001135610	ENSG00000116731	65.0289	-0.314504	NA	58.7985	-0.290818	NA	46.1749	-0.989289	0.0338506	40.9312	-0.918992	0.0394928	43.1032	-1.25554	0.00619151	40.6023	-0.97857	0.0409105
RHOA_NM_001664	RHOA	NM_001664	ENSG00000067560	58.1939	-0.558308	NA	59.9271	-0.0319315	NA	45.4494	-0.932777	0.049688	43.2397	-0.417695	0.332984	41.6677	-1.28959	0.00624816	45.3122	-0.278233	0.54967
NUP58_NM_001008564	NUP58	NM_001008564	ENSG00000139496	43.7495	-0.6339	NA	40.5171	-0.0465347	NA	36.8354	-0.799072	0.103178	32.0594	-0.200932	NA	31.6126	-1.40017	0.00630109	31.3999	-0.24826	0.637073
PFKL_NM_001002021	PFKL	NM_001002021	ENSG00000141959	67.6172	-0.559776	NA	31.8321	-0.183977	NA	48.289	-1.31563	0.0040806	25.4965	-0.368138	NA	49.4182	-1.19725	0.00630109	23.0427	-0.646278	NA
THOC5_NM_001002877	THOC5	NM_001002877	ENSG00000100296	47.9591	-0.514985	NA	20.8435	-0.189188	NA	36.9156	-1.00222	0.0439762	20.5855	0.0770088	NA	33.8674	-1.38252	0.00630109	15.1123	-0.629341	NA
CDKN1A_NM_001220777	CDKN1A	NM_001220777	ENSG00000124762	59.9982	-0.448707	NA	80.0491	-0.810068	0.0467468	44.9423	-0.969843	0.0378416	61.5097	-1.24979	0.0022386	41.7801	-1.26984	0.00630109	59.9538	-1.39494	0.000548936
ANAPC1_NM_022662	ANAPC1	NM_022662	ENSG00000153107	55.9589	-0.542222	NA	51.1643	-0.457102	NA	41.1587	-1.16267	0.0166006	40.8007	-0.688634	0.114234	40.0795	-1.29178	0.00634069	36.186	-1.13819	0.0198879
CSGALNACT2_NM_018590	CSGALNACT2	NM_018590	ENSG00000169826	74.4308	-0.314255	0.281054	56.8298	-0.454409	NA	53.4709	-0.935165	0.0374936	49.7835	-0.4286	0.2896	49.847	-1.19999	0.00635391	43.2682	-0.873697	0.0599457
LOC101929715_NR_110597	LOC101929715	NR_110597	N/A	63.7533	-0.451251	NA	32.8839	-0.466898	NA	52.244	-0.653659	0.139893	31.5923	-0.19555	NA	44.5795	-1.23982	0.00635391	30.2508	-0.292433	0.585652
PYGL_NM_001163940	PYGL	NM_001163940	ENSG00000100504	56.4263	-0.261	NA	66.7081	-0.499515	NA	43.3084	-0.627886	0.185226	48.7755	-1.04745	0.0155968	35.58	-1.34719	0.00635591	52.5439	-0.771401	0.0725495
ABL1_NM_005157	ABL1	NM_005157	ENSG00000097007	57.135	-0.328242	NA	64.4797	-0.386202	NA	43.6298	-0.735606	0.115965	51.5835	-0.579045	0.164195	37.2714	-1.32455	0.00637658	48.3478	-0.781013	0.0888657
MIR4522_NR_039748	MIR4522	NR_039748	ENSG00000263583	74.6552	-0.469959	0.13907	49.4446	-0.474799	NA	59.2193	-0.783888	0.0746401	39.9278	-0.68098	0.119115	53.3032	-1.16203	0.00639648	36.8477	-0.985065	0.0521969
SF3B5_NM_031287	SF3B5	NM_031287	ENSG00000169976	46.1092	-0.328713	NA	40.8083	-0.326462	NA	35.0067	-0.765927	0.121074	34.8934	-0.34098	NA	29.582	-1.44225	0.00641665	37.0419	-0.177518	0.725553
RPS27A_NM_001177413	RPS27A	NM_001177413	ENSG00000143947	45.1091	-0.371606	NA	63.7029	-0.585583	NA	39.6112	-0.358711	0.440921	46.9863	-1.12297	0.012491	29.2855	-1.43865	0.00642149	46.5475	-1.17761	0.00971458
PHB2_NM_001144831	PHB2	NM_001144831	ENSG00000215021	77.5498	-0.2987	0.296762	58.1006	-0.438635	NA	56.0331	-0.878629	0.045468	46.2205	-0.670321	0.112981	51.6424	-1.18145	0.00652138	41.4804	-1.07655	0.022716
EIF4ENIF1_NM_001164502	EIF4ENIF1	NM_001164502	ENSG00000184708	75.3984	-0.305892	0.288277	46.0336	-0.0871174	NA	58.4234	-0.659971	0.127922	34.0502	-0.430955	NA	50.085	-1.20143	0.00652138	34.2525	-0.437708	0.394868
GIMAP2_NM_015660	GIMAP2	NM_015660	ENSG00000106560	50.9056	-0.50223	NA	48.9148	-0.298031	NA	35.8728	-1.27504	0.0120497	36.2071	-0.719686	NA	35.0578	-1.37954	0.00653038	34.6294	-0.892631	0.0806496
RTP4_NM_022147	RTP4	NM_022147	ENSG00000136514	46.937	-0.606241	NA	58.4774	-0.27629	NA	34.5366	-1.29613	0.010677	44.8987	-0.58464	0.177132	33.9089	-1.37267	0.0065427	37.7815	-1.21861	0.0136854
ENTHD2_NM_144679	ENTHD2	NM_144679	ENSG00000167302	55.8332	-0.306188	NA	40.755	0.111008	NA	43.1816	-0.658313	0.160672	33.9601	0.105133	NA	35.8557	-1.35056	0.00656197	29.7419	-0.184707	0.737942
GSE1_NM_001134473	GSE1	NM_001134473	ENSG00000131149	60.0228	-0.351566	NA	80.7067	-0.082938	0.758241	47.6991	-0.629349	0.161737	58.2041	-0.535527	0.172619	40.0073	-1.28193	0.00657231	55.367	-0.684476	0.107319
LRSAM1_NM_001005374	LRSAM1	NM_001005374	ENSG00000148356	48.8932	-0.387491	NA	35.076	-0.0910535	NA	40.6579	-0.542587	0.245579	26.8615	-0.338232	NA	32.1362	-1.39348	0.00663976	27.8639	-0.217676	0.693901
DBF4B_NM_025104	DBF4B	NM_025104	ENSG00000161692	46.064	-0.309667	NA	46.4941	-0.387069	NA	34.0566	-0.810353	0.105716	39.4458	-0.411249	0.3406	29.1733	-1.44048	0.00663998	34.2596	-0.873354	0.0812603
AKR7A2_NM_003689	AKR7A2	NM_003689	ENSG00000053371	73.991	-0.254294	0.369162	50.839	-0.174741	NA	55.1454	-0.729704	0.0942868	32.2976	-1.05946	NA	48.5026	-1.21565	0.00664222	34.049	-0.886004	0.0771176
KCNN3_NM_170782	KCNN3	NM_170782	ENSG00000143603	63.768	-0.458404	NA	38.1633	-0.274756	NA	46.0981	-1.11461	0.0208835	34.1574	-0.171156	NA	44.4023	-1.27572	0.00664637	32.8161	-0.254156	0.635069
EIF2AK4_NM_001013703	EIF2AK4	NM_001013703	ENSG00000128829	46.6617	-0.742969	NA	49.802	-0.0662776	NA	38.1479	-1.06387	0.029478	41.8749	-0.0967979	0.819603	35.8762	-1.33327	0.00664637	36.9035	-0.41311	0.403519
C7orf49_NM_001243749	C7orf49	NM_001243749	ENSG00000122783	62.2022	-0.518236	NA	57.8744	-0.0983613	NA	46.3896	-1.07918	0.0216039	42.6205	-0.484812	0.265645	44.455	-1.26397	0.00664637	43.6881	-0.387218	0.404962
MEF2C_NM_001193348	MEF2C	NM_001193348	ENSG00000081189	66.61	-0.236406	NA	85.5985	-0.315587	0.329535	52.4799	-0.522168	0.243623	63.4995	-0.581409	0.282286	42.5695	-1.28147	0.00666647	55.0738	-1.30459	0.00502688
HEXIM2_NM_001303440	HEXIM2	NM_001303440	ENSG00000168517	98.9584	-0.349873	0.206435	44.8209	-0.383849	NA	75.9054	-0.748018	0.0609934	42.0171	-0.172333	0.681606	69.7019	-1.05125	0.00667124	34.6643	-0.716614	0.150354
EIF3D_NM_003753	EIF3D	NM_003753	ENSG00000100353	55.6581	-0.384662	NA	71.798	-0.692424	NA	42.5809	-0.803803	0.0928856	57.9429	-0.912113	0.0271085	37.0151	-1.3472	0.00669471	60.2476	-0.774953	0.0576238
URB1_NM_014825	URB1	NM_014825	ENSG00000142207	45.934	-0.523422	NA	27.5822	-0.137913	NA	35.6566	-0.937664	0.062956	26.9003	0.157333	NA	31.4498	-1.42475	0.0067027	20.8711	-0.413934	NA
DSCC1_NM_024094	DSCC1	NM_024094	ENSG00000136982	75.5386	-0.500151	0.121812	52.2801	-0.345984	NA	61.3441	-0.742143	0.0903263	42.1358	-0.526273	0.220965	54.9715	-1.14762	0.00670397	40.839	-0.627116	0.199167
NREP_NM_001142481	NREP	NM_001142481	ENSG00000134986	99.288	-0.278218	0.299471	71.6752	-0.218401	NA	75.3763	-0.700828	0.0817415	54.547	-0.53702	0.20022	67.9392	-1.07254	0.00671742	51.4957	-0.732413	0.114828
EXOSC8_NM_181503	EXOSC8	NM_181503	ENSG00000120699	84.9658	-0.473461	0.137938	66.7124	-0.424983	NA	62.6754	-1.06285	0.0153647	51.0903	-0.787616	0.066236	61.3167	-1.14737	0.00672201	51.0801	-0.793195	0.077631
PLAC8_NM_001130715	PLAC8	NM_001130715	ENSG00000145287	85.1246	-0.386224	0.193043	109.351	-0.431093	0.194456	73.95	-0.401105	0.336018	88.4249	-0.437531	0.419826	58.6368	-1.21937	0.00672467	77.6525	-1.08817	0.00772817
NUP98_NM_005387	NUP98	NM_005387	ENSG00000110713	52.299	-0.668693	NA	38.1494	-0.0819577	NA	44.5753	-0.838963	0.0807553	26.4516	-0.601823	NA	39.3821	-1.33143	0.00672864	25.4554	-0.748285	NA
BBS10_NM_024685	BBS10	NM_024685	ENSG00000179941	52.3854	-0.559187	NA	45.0808	-0.276353	NA	40.8005	-0.988958	0.0461125	36.211	-0.448975	NA	37.6795	-1.33135	0.00673188	36.8551	-0.404837	0.41403
RBBP4_NM_001135256	RBBP4	NM_001135256	ENSG00000162521	71.112	-0.588918	0.0992945	73.3893	-0.220198	NA	56.5863	-0.923574	0.0378885	57.36	-0.448467	0.256819	52.9227	-1.18128	0.00673869	52.6224	-0.706346	0.109792
CTSA_NM_000308	CTSA	NM_000308	ENSG00000064601	65.4935	-0.492902	NA	50.9504	-0.604841	NA	50.2995	-0.928129	0.0416997	44.6868	-0.559331	0.185756	46.3625	-1.23518	0.00673869	38.0516	-1.07442	0.0344722
TMEM43_NM_024334	TMEM43	NM_024334	ENSG00000170876	67.1148	-0.59507	NA	36.8001	-0.334732	NA	51.7881	-1.05137	0.0186061	32.3601	-0.29153	NA	49.9715	-1.17888	0.00673869	27.5752	-0.70805	0.20284
LOC729683_NR_046273	LOC729683	NR_046273	ENSG00000279369	58.0483	-0.234259	NA	97.4918	-0.574265	0.0993565	41.0585	-0.87044	0.0669189	71.1437	-1.17471	0.00253045	36.7577	-1.31796	0.00675946	66.5326	-1.47101	0.000173175
FOXJ3_NM_014947	FOXJ3	NM_014947	ENSG00000198815	73.2192	-0.117638	0.672114	99.1897	-0.255111	0.36672	50.5641	-0.799334	0.0770384	68.422	-0.939298	0.016355	44.7035	-1.2527	0.00677743	63.8116	-1.21819	0.00193694
FOXP1_NM_001244816	FOXP1	NM_001244816	ENSG00000114861	61.0685	-0.495314	NA	76.13	-0.586758	0.112191	45.0943	-1.12952	0.0185992	61.0387	-0.841667	0.0440571	43.5844	-1.27965	0.00690352	58.0671	-1.0155	0.0159094
DALRD3_NM_018114	DALRD3	NM_018114	ENSG00000178149	83.1796	-0.298286	0.286303	115.017	-0.274784	0.321731	58.5357	-1.00118	0.0224005	80.7925	-0.899618	0.0163037	56.1125	-1.13722	0.00690797	81.7826	-0.829907	0.0251403
ICOSLG_NM_001283050	ICOSLG	NM_001283050	ENSG00000160223	47.4852	-0.522277	NA	38.11	0.00602531	NA	37.7214	-0.840223	0.0844997	29.3887	-0.176446	NA	32.8639	-1.37934	0.00690812	30.1847	-0.089902	0.869132
ZSCAN12_NM_001163391	ZSCAN12	NM_001163391	ENSG00000158691	38.5275	-0.435542	NA	60.5946	-0.428351	NA	31.7272	-0.648856	0.199022	44.4699	-0.965719	0.0326615	25.4221	-1.49601	0.00691035	44.4261	-0.981989	0.0311617
KMT2E-AS1_NR_024586	KMT2E-AS1	NR_024586	N/A	111.306	-0.407878	0.158542	134.698	-0.539973	0.092804	89.991	-0.637688	0.101245	103.962	-0.886942	0.010759	81.0496	-0.994346	0.00692134	94.7593	-1.25529	0.000191078
HOXB4_NM_024015	HOXB4	NM_024015	ENSG00000182742	53.0442	-0.497972	NA	48.3811	-0.545025	NA	43.433	-0.717774	0.139748	38.1422	-0.857267	NA	37.0252	-1.31478	0.00693338	33.8221	-1.36616	0.00665396
FCMR_NM_001142473	FCMR	NM_001142473	ENSG00000162894	69.971	-0.740619	0.0581549	52.4032	-0.409164	NA	51.9611	-1.38474	0.00266722	40.1117	-0.755971	0.0873397	55.1983	-1.13248	0.00693974	41.8063	-0.626473	0.182433
MGAT1_NM_001114617	MGAT1	NM_001114617	ENSG00000131446	71.9367	-0.701644	0.0604985	36.0046	-0.352176	NA	59.7477	-0.898466	0.0363181	32.0024	-0.280202	NA	55.9235	-1.15412	0.00694083	29.6402	-0.469412	0.376878
NEDD8-MDP1_NM_001199823	NEDD8-MDP1	NM_001199823	ENSG00000255526	50.1154	-0.369083	NA	44.9917	0.0644503	NA	37.0129	-0.901293	0.0666168	34.6057	-0.149103	NA	32.8536	-1.36932	0.00697874	33.5802	-0.188856	0.716544
MIR1204_NR_031609	MIR1204	NR_031609	ENSG00000283710	118.307	-0.329979	0.21088	86.8517	-0.368574	0.242915	91.6893	-0.692991	0.0814608	76.405	-0.290785	0.421433	84.0316	-0.996789	0.00699886	59.7689	-1.11305	0.00698796
CD33_NM_001082618	CD33	NM_001082618	ENSG00000105383	79.3776	-0.495066	0.121812	80.0186	-0.419815	0.213885	59.3886	-1.03406	0.0174955	61.3469	-0.74279	0.068476	57.7114	-1.11927	0.00700499	58.3301	-0.936958	0.0230462
ACY1_NM_000666	ACY1	NM_000666	ENSG00000243989	73.3851	-0.562859	0.100771	66.9047	-0.474511	NA	55.7099	-1.07643	0.0145313	48.2686	-1.04496	0.0165502	54.615	-1.13434	0.00703532	48.531	-1.03488	0.0186756
BTAF1_NM_003972	BTAF1	NM_003972	ENSG00000095564	45.3589	-0.58953	NA	38.3548	-0.105713	NA	37.8308	-0.783391	0.112658	34.0211	-0.00940614	NA	32.5861	-1.3726	0.00704616	29.9757	-0.290266	0.586247
ANP32E_NM_001136479	ANP32E	NM_001136479	ENSG00000143401	109.508	-0.334857	0.21088	80.7994	-0.471087	0.164361	88.4485	-0.559387	0.143213	68.2299	-0.513768	0.187054	77.5947	-1.00812	0.00705078	56.4764	-1.16941	0.005387
RABEP2_NM_024816	RABEP2	NM_024816	ENSG00000177548	53.4616	-0.329991	NA	36.5291	-0.499876	NA	44.9171	-0.439162	0.330649	36.1554	-0.166383	NA	34.9641	-1.33477	0.00705078	29.3747	-0.729811	0.168123
DNAJC7_NM_001144766	DNAJC7	NM_001144766	ENSG00000168259	80.1199	-0.470669	0.140435	77.3042	-0.058763	0.833068	66.6404	-0.609815	0.145301	60.9999	-0.237649	0.528426	57.1573	-1.14911	0.00705078	52.0848	-0.664313	0.142913
EIF4ENIF1_NM_001164501	EIF4ENIF1	NM_001164501	ENSG00000184708	81.4872	-0.247908	0.371288	43.9777	0.145961	NA	59.217	-0.802726	0.0638638	32.322	-0.145195	NA	53.7443	-1.14644	0.00705078	31.3721	-0.228146	0.674582
ZSCAN26_NM_001023560	ZSCAN26	NM_001023560	ENSG00000197062	45.0759	-0.454715	NA	69.0186	-0.50503	NA	35.7106	-0.581393	0.34974	55.8254	-0.700703	0.0850664	30.2193	-1.44019	0.00705331	54.2544	-0.789596	0.0646138
RANBP9_NM_005493	RANBP9	NM_005493	ENSG00000010017	80.3408	-0.298885	0.294436	50.6481	-0.286107	NA	60.4543	-0.749304	0.0809786	40.8403	-0.442805	0.307437	54.3062	-1.14678	0.0070698	40.663	-0.458085	0.342253
UBC_NM_021009	UBC	NM_021009	ENSG00000150991	67.9424	-0.593324	NA	64.0716	0.0334253	NA	61.0947	-0.520683	0.22927	50.1676	-0.136586	0.733887	50.0848	-1.21728	0.00708741	47.9808	-0.252396	0.582861
TP53I13_NM_138349	TP53I13	NM_138349	ENSG00000167543	70.048	-0.373152	0.225091	38.3637	-0.0798702	NA	48.8929	-1.09928	0.0202842	32.2905	-0.100161	NA	47.1727	-1.24278	0.00710042	28.2044	-0.412015	0.446727
C16orf54_NM_175900	C16orf54	NM_175900	ENSG00000185905	77.1381	-0.388168	0.195847	92.3595	-0.441094	0.179989	59.0272	-0.805638	0.0620477	70.5089	-0.806315	0.0353474	52.6176	-1.20306	0.0072361	62.8521	-1.24326	0.00186032
CREB3L4_NM_001255979	CREB3L4	NM_001255979	ENSG00000143578	78.0655	-0.623534	0.0753713	42.2	-0.198929	NA	63.0631	-0.906217	0.0334103	26.396	-1.12182	NA	59.7706	-1.09716	0.00728086	30.899	-0.62995	0.231076
ATP9B_NM_001306085	ATP9B	NM_001306085	ENSG00000166377	58.8056	-0.633006	NA	37.3931	-0.140422	NA	47.5176	-0.971662	0.0358777	32.5012	-0.0991757	NA	44.5571	-1.23103	0.00728086	30.2227	-0.264496	0.62178
SEPSECS-AS1_NR_037934	SEPSECS-AS1	NR_037934	N/A	57.3628	-0.578973	NA	45.6728	-0.191553	NA	46.2424	-0.865405	0.0654465	36.3286	-0.391187	NA	41.7918	-1.24691	0.00728086	29.0149	-1.10204	0.0409529
ENOPH1_NM_001292017	ENOPH1	NM_001292017	ENSG00000145293	69.1877	-0.355518	0.236471	46.5938	-0.136407	NA	58.099	-0.465868	0.272686	32.8737	-0.643144	NA	46.8459	-1.2138	0.00728086	35.8963	-0.370678	0.464452
CFLAR_NM_001308043	CFLAR	NM_001308043	ENSG00000003402	80.9778	-0.490943	0.121812	164.361	-0.421585	0.13943	64.9828	-0.772035	0.0680228	126.848	-0.747361	0.0327964	59.2254	-1.11312	0.00730381	110.592	-1.29197	5.80391e-05
HIST1H2BB_NM_021062	HIST1H2BB	NM_021062	ENSG00000276410	139.759	-0.548363	0.0722069	96.3986	-0.818266	0.046908	116.721	-0.69104	0.0521013	81.7	-0.908433	0.02296	109.53	-0.888826	0.00730381	81.1086	-0.913369	0.0213831
RANBP2_NM_006267	RANBP2	NM_006267	ENSG00000153201	53.429	-0.591758	NA	18.8738	-0.13684	NA	42.2135	-0.97545	0.0451668	14.894	-0.33726	NA	38.8585	-1.33005	0.0073205	16.6755	-0.0867301	NA
CHCHD5_NM_001304354	CHCHD5	NM_001304354	ENSG00000125611	65.2771	-0.519054	NA	40.4001	-0.310854	NA	53.2676	-0.74594	0.091045	34.5471	-0.323566	NA	46.9853	-1.22454	0.00733284	29.8816	-0.750654	0.152524
NEK9_NM_033116	NEK9	NM_033116	ENSG00000119638	72.931	-0.249939	0.377789	77.8971	-0.237076	0.419605	59.7658	-0.417622	0.315871	53.9077	-0.897354	0.0311297	47.9104	-1.18532	0.0073358	53.7878	-0.894522	0.0350212
OST4_NM_001134693	OST4	NM_001134693	ENSG00000228474	55.0737	-0.468479	NA	37.4892	0.187612	NA	44.373	-0.71906	0.132635	27.3529	-0.100941	NA	38.4698	-1.29319	0.0073358	26.5635	-0.158809	NA
SIRPA_NM_001040023	SIRPA	NM_001040023	ENSG00000198053	75.5066	-0.240515	0.417392	69.6136	-0.400078	NA	50.5499	-1.08197	0.0174007	57.7324	-0.484356	0.214507	49.1102	-1.18715	0.0073358	47.1347	-1.20587	0.00642704
SLC44A1_NM_001286730	SLC44A1	NM_001286730	ENSG00000070214	88.4952	-0.448837	0.146898	91.4552	-0.290033	0.323317	73.0174	-0.6424	0.127854	62.1278	-1.05152	0.0104764	63.9706	-1.12231	0.0073358	60.373	-1.15556	0.00421888
ANAPC15_NM_001278494	ANAPC15	NM_001278494	ENSG00000110200	51.6894	-0.523559	NA	51.352	-0.0768085	NA	39.8913	-0.957019	0.0526288	38.8095	-0.386437	0.377498	36.1544	-1.35756	0.00735708	35.1542	-0.679181	0.181154
KIR3DX1_NR_026716	KIR3DX1	NR_026716	ENSG00000104970	71.7877	-0.132902	0.70082	125.841	-0.540023	0.098551	50.8514	-0.560907	0.365719	93.0032	-1.04716	0.00363446	43.7696	-1.34653	0.00735708	80.7509	-1.72295	1.76818e-06
NME4_NM_001286433	NME4	NM_001286433	ENSG00000103202	59.9928	-0.48603	NA	56.4343	-0.345751	NA	48.1591	-0.767108	0.0939454	41.0528	-0.825936	0.0641016	42.2431	-1.25827	0.00735975	39.9643	-0.937847	0.0475834
LINC01126_NR_027251	LINC01126	NR_027251	ENSG00000279873	100.46	-0.39659	0.160052	117.547	-0.394064	0.186974	77.0542	-0.808716	0.0416591	81.1481	-1.13921	0.00228828	72.5635	-1.01647	0.00737185	77.2511	-1.3166	0.000585369
OR52W1_NM_001005178	OR52W1	NM_001005178	ENSG00000175485	45.9866	-0.531128	NA	56.2465	-0.648356	NA	35.8795	-0.932133	0.0607215	47.6442	-0.711952	0.0901421	31.8801	-1.38895	0.0074064	43.8102	-1.00429	0.0287374
NREP_NM_001142482	NREP	NM_001142482	ENSG00000134986	99.5062	-0.283303	0.292877	71.7705	-0.202015	NA	75.5639	-0.706267	0.0789482	54.3697	-0.529678	0.206813	68.4724	-1.05764	0.00742584	51.3213	-0.724654	0.12
AZIN1_NM_001301668	AZIN1	NM_001301668	ENSG00000155096	87.3211	-0.426589	0.149975	57.0448	-0.16798	NA	65.7854	-0.912223	0.0286787	40.9361	-0.637137	0.143969	62.1303	-1.10039	0.00744734	47.4956	-0.197311	0.665704
TNKS2-AS1_NR_108070	TNKS2-AS1	NR_108070	ENSG00000228701	49.4959	-0.608332	NA	34.4041	-0.21017	NA	38.4539	-1.03793	0.0336997	29.0669	-0.279417	NA	36.1011	-1.3202	0.00745444	25.4382	-0.658201	NA
POU6F1_NR_026893	POU6F1	NR_026893	ENSG00000184271	51.5707	-0.58721	NA	29.2482	0.221733	NA	39.6564	-1.05334	0.0297611	21.2032	-0.0315993	NA	37.5364	-1.29889	0.00745444	21.8694	0.0828866	NA
CEBPE_NM_001805	CEBPE	NM_001805	ENSG00000092067	62.2367	-0.496428	NA	35.386	-0.0116444	NA	48.2263	-0.903509	0.0479623	25.4716	-0.388499	NA	44.4566	-1.21539	0.00748131	25.7103	-0.374074	NA
HIST1H3I_NM_003533	HIST1H3I	NM_003533	ENSG00000275379	131.341	-0.574665	0.0753713	141.435	-0.377919	0.195256	107.514	-0.798426	0.039593	117.725	-0.442633	0.183549	102.382	-0.956943	0.0075027	105.34	-0.804556	0.0197397
ZNF398_NM_170686	ZNF398	NM_170686	ENSG00000197024	69.9294	-0.420986	0.178069	66.5541	-0.137968	NA	53.5039	-0.840155	0.0567786	45.5462	-0.724756	0.103365	49.0283	-1.16916	0.0075027	48.3938	-0.573956	0.20378
S100PBP_NM_001256121	S100PBP	NM_001256121	ENSG00000116497	65.4682	-0.431589	NA	57.59	-0.0590464	NA	50.2639	-0.862399	0.0550308	41.9811	-0.463644	0.275179	46.0249	-1.19796	0.0075037	35.029	-1.05605	0.0333927
HHAT_NM_001170580	HHAT	NM_001170580	ENSG00000054392	48.5671	-0.495479	NA	33.1319	-0.329184	NA	39.0884	-0.783629	0.105011	24.4696	-0.752493	NA	33.5102	-1.35874	0.0075037	26.938	-0.464739	NA
MIR1292_NR_031699	MIR1292	NR_031699	ENSG00000284481	65.2248	-0.393436	NA	56.4762	-0.245896	NA	50.3132	-0.794599	0.0789193	40.948	-0.734706	0.0934429	44.979	-1.22329	0.0075037	40.8216	-0.753385	0.109167
CPSF4L_NM_001129885	CPSF4L	NM_001129885	ENSG00000187959	52.8689	-0.571996	NA	34.2755	-0.269757	NA	40.3321	-1.09634	0.0234518	23.2552	-0.938936	NA	38.5421	-1.27828	0.00751026	27.9402	-0.383846	0.482361
FAM65B_NM_001286446	FAM65B	NM_001286446	ENSG00000111913	51.3318	-0.403443	NA	43.7285	-0.46703	NA	38.4799	-0.897095	0.0645286	30.7326	-1.17056	NA	34.2889	-1.34124	0.00754241	33.7799	-0.820661	0.113945
MAPKAPK5_NM_003668	MAPKAPK5	NM_003668	ENSG00000089022	53.5892	-0.257411	NA	53.7091	-0.231642	NA	40.0697	-0.715599	0.135886	37.2212	-0.842683	NA	33.1005	-1.40727	0.0075799	35.7614	-1.00364	0.0419559
TMEM147_NM_001242597	TMEM147	NM_001242597	ENSG00000105677	72.3459	-0.654702	0.0718825	54.4019	-0.101691	NA	56.207	-1.11372	0.0111038	41.2436	-0.405633	0.336996	55.9579	-1.11428	0.0075952	43.0186	-0.286664	0.552706
FAIM_NM_018147	FAIM	NM_018147	ENSG00000158234	65.1684	-0.708586	NA	42.8768	-0.469056	NA	50.3779	-1.1859	0.00935914	35.3035	-0.617544	NA	50.7908	-1.15417	0.00765173	31.8638	-0.960685	0.0635801
DNAJC5B_NM_033105	DNAJC5B	NM_033105	ENSG00000147570	59.4698	-0.588857	NA	111.762	-0.265272	0.365757	50.7982	-0.688476	0.134984	75.4208	-1.03921	0.0108887	44.0263	-1.2365	0.00769299	70.5201	-1.32888	0.0010397
STX4_NM_001272095	STX4	NM_001272095	ENSG00000103496	59.3708	-0.139792	NA	29.3065	-0.0141572	NA	41.3089	-0.785274	0.0991667	22.3124	-0.242648	NA	35.8882	-1.32245	0.00769647	19.5677	-0.627876	NA
RBM8A_NM_005105	RBM8A	NM_005105	ENSG00000265241	77.9326	-0.601424	0.0872536	36.1522	-0.411645	NA	62.914	-0.888526	0.0518787	35.3314	-0.0962089	NA	59.3913	-1.10777	0.00772018	31.2067	-0.424494	0.416599
ACACA_NM_198836	ACACA	NM_198836	ENSG00000278540	50.9163	-0.877575	NA	57.9579	-0.20315	NA	43.6448	-1.02511	0.0300131	40.9773	-0.740484	0.0920757	41.4121	-1.24826	0.00772018	38.7449	-0.935882	0.0525789
LOC648987_NR_104651	LOC648987	NR_104651	ENSG00000177738	74.7367	-0.225092	0.432688	119.397	-0.376462	0.208044	59.7952	-0.467979	0.27346	93.8833	-0.633162	0.0810573	47.9432	-1.22884	0.00772018	82.3593	-1.11273	0.00251072
IBTK_NM_001300906	IBTK	NM_001300906	ENSG00000005700	47.8706	-0.526456	NA	40.1322	-0.402951	NA	40.3273	-0.654597	0.195695	31.341	-0.723465	NA	33.3871	-1.35375	0.00779473	30.0515	-0.887671	0.0919565
SLC22A11_NM_001307985	SLC22A11	NM_001307985	ENSG00000168065	49.556	-0.601737	NA	36.9516	-0.416641	NA	38.898	-0.982543	0.0441845	28.763	-0.696535	NA	35.8779	-1.31277	0.00781977	31.2669	-0.458302	0.377489
NFE2L2_NM_006164	NFE2L2	NM_006164	ENSG00000116044	73.9519	-0.350966	0.23713	121.534	-0.200554	0.434421	56.7073	-0.77067	0.0788736	90.6469	-0.595377	0.0912422	51.1087	-1.15415	0.00781977	85.8977	-0.758278	0.0340069
ITGB2-AS1_NR_038311	ITGB2-AS1	NR_038311	ENSG00000227039	93.8028	-0.355441	0.207057	46.0315	-0.153946	NA	71.1521	-0.787887	0.0553317	36.7693	-0.29033	NA	65.932	-1.05565	0.00782219	33.801	-0.547414	0.282429
IRF2_NM_002199	IRF2	NM_002199	ENSG00000168310	73.088	-0.381476	0.204812	68.9841	-0.278065	NA	54.1282	-0.929867	0.0361577	51.4901	-0.671929	0.0998602	50.9538	-1.16426	0.00782219	45.8595	-1.09914	0.013937
KLC1_NM_001130107	KLC1	NM_001130107	ENSG00000126214	66.5916	-0.520947	NA	34.4252	-0.36616	NA	50.7612	-0.991473	0.029057	25.8463	-0.759764	NA	48.1264	-1.19072	0.0078345	26.5182	-0.699636	NA
ACTN1-AS1_NR_073422	ACTN1-AS1	NR_073422	ENSG00000259062	46.0487	-0.447408	NA	32.1729	0.161879	NA	37.1076	-0.715011	0.14152	23.9136	-0.063259	NA	31.2422	-1.39224	0.00785548	23.1807	-0.109545	NA
PMS2_NM_000535	PMS2	NM_000535	ENSG00000122512	48.3738	-0.261842	NA	46.0773	-0.330548	NA	37.3189	-0.607985	0.207406	35.3693	-0.651393	NA	30.2394	-1.39056	0.00785548	32.2717	-0.939599	0.0727333
CXCR2_NM_001557	CXCR2	NM_001557	ENSG00000180871	62.4471	-0.58826	NA	42.9603	-0.130901	NA	50.0115	-0.908201	0.0526288	33.2824	-0.381153	NA	45.7491	-1.2419	0.00786728	30.5025	-0.620104	0.237486
HILPDA_NM_001098786	HILPDA	NM_001098786	ENSG00000135245	80.0988	-0.330712	0.246979	41.7771	0.0516787	NA	61.725	-0.713752	0.096948	28.7859	-0.435029	NA	54.944	-1.12076	0.00787246	32.8972	-0.0743127	0.889162
KARS_NM_001130089	KARS	NM_001130089	ENSG00000065427	46.2552	-0.675163	NA	44.759	-0.147981	NA	37.8575	-0.929414	0.0571786	30.9759	-0.710459	NA	34.4625	-1.32036	0.00790885	32.0174	-0.62843	0.222814
HMMR_NM_001142556	HMMR	NM_001142556	ENSG00000072571	56.6755	-0.494538	NA	78.6463	-0.18699	0.515369	45.3596	-0.803761	0.0848639	58.2682	-0.592517	0.141589	40.1594	-1.28299	0.00790885	49.1731	-1.18666	0.00925041
LOC344967_NR_027277	LOC344967	NR_027277	ENSG00000205794	108.196	-0.239882	0.359337	155.353	-0.406229	0.149726	80.059	-0.735483	0.078126	118.751	-0.76183	0.029746	73.5592	-1.02541	0.00792458	103.474	-1.31309	5.60673e-05
RPL37_NM_000997	RPL37	NM_000997	ENSG00000145592	81.5501	-0.535841	0.107485	88.1474	-0.561363	0.110421	60.2579	-1.1289	0.0117655	66.7998	-1.00445	0.0114299	60.3465	-1.11358	0.0079257	63.6831	-1.21917	0.00252222
CCDC57_NM_198082	CCDC57	NM_198082	ENSG00000176155	71.3125	-0.553904	0.107234	56.348	-0.146722	NA	52.5261	-1.16049	0.0101775	45.5195	-0.278372	0.498896	51.4899	-1.20347	0.00794695	44.3208	-0.310666	0.505962
NTPCR_NM_032324	NTPCR	NM_032324	ENSG00000135778	54.7196	-0.726594	NA	54.289	-0.42125	NA	43.6492	-1.11425	0.0250492	36.8036	-1.20379	NA	41.587	-1.31061	0.00797849	40.3481	-0.884174	0.0623829
RAB7A_NM_004637	RAB7A	NM_004637	ENSG00000075785	60.4514	-0.425634	NA	59.6584	-0.147559	NA	47.1771	-0.768256	0.0958982	46.8913	-0.352196	0.384035	41.7478	-1.26295	0.0079824	45.1405	-0.447361	0.327244
KRBOX4_NM_001129898	KRBOX4	NM_001129898	ENSG00000147121	40.9245	-0.396237	NA	17.4797	-0.431846	NA	30.9845	-0.85694	0.094313	15.1593	-0.516923	NA	26.6631	-1.45177	0.00800855	15.1209	-0.564738	NA
TAPT1_NM_153365	TAPT1	NM_153365	ENSG00000169762	71.6731	-0.447118	0.152931	52.9394	-0.359392	NA	53.3263	-0.981869	0.0265731	45.4856	-0.369384	0.372083	51.0978	-1.14863	0.00801152	36.2496	-1.09092	0.0271485
PRPF3_NM_004698	PRPF3	NM_004698	ENSG00000117360	46.3806	-0.610948	NA	43.2864	-0.212459	NA	36.9812	-0.97787	0.049167	38.9696	-0.0949263	0.823875	33.8479	-1.34107	0.00806346	33.3719	-0.515818	0.323336
H1FX_NM_006026	H1FX	NM_006026	ENSG00000184897	58.5855	-0.465129	NA	38.866	-0.153629	NA	47.5739	-0.68464	0.137577	27.972	-0.558326	NA	41.1138	-1.25486	0.00806346	31.2218	-0.278225	0.60023
MTO1_NM_001123226	MTO1	NM_001123226	ENSG00000135297	66.4528	-0.339647	NA	75.3597	-0.349324	0.275632	45.2982	-1.17999	0.0149795	62.6866	-0.433534	0.260641	44.5499	-1.23472	0.00807822	51.6431	-1.05359	0.0200745
SIGIRR_NM_001135053	SIGIRR	NM_001135053	ENSG00000185187	65.5125	-0.370833	NA	116.598	-0.577077	0.0928089	48.0974	-0.925064	0.0433983	84.5861	-1.19558	0.00183258	44.8058	-1.20083	0.00809246	76.5622	-1.68789	7.43333e-06
PWWP2B_NM_001098637	PWWP2B	NM_001098637	ENSG00000171813	51.1244	-0.406293	NA	52.3093	-0.540656	NA	37.4746	-0.983774	0.0445486	45.0591	-0.554291	0.193336	34.6365	-1.31672	0.00814026	40.0633	-0.959151	0.0464675
PCAT18_NR_024259	PCAT18	NR_024259	ENSG00000265369	50.3863	-0.694844	NA	45.1749	-0.628866	NA	40.5366	-1.02188	0.0362468	33.7915	-1.13912	NA	38.2457	-1.2716	0.00814333	35.2602	-1.01149	0.0494144
CLDN7_NM_001185022	CLDN7	NM_001185022	ENSG00000181885	74.9418	-0.364892	0.231633	50.072	-0.0730944	NA	52.5995	-1.08965	0.0147555	35.0488	-0.546181	NA	51.8475	-1.13607	0.00815345	32.8358	-0.491864	0.500786
EVL_NM_016337	EVL	NM_016337	ENSG00000196405	67.2281	-0.537514	NA	117.785	-0.673103	0.056857	49.3174	-1.16459	0.0133243	87.277	-1.22871	0.000815971	48.9134	-1.21613	0.0081881	71.8258	-2.38086	7.38184e-10
BLOC1S6_NM_001311255	BLOC1S6	NM_001311255	ENSG00000104164	72.0198	-0.735022	0.0583325	45.1479	-0.183752	NA	68.3891	-0.502099	0.219432	35.7633	-0.372671	NA	57.6078	-1.09143	0.0081881	30.706	-0.838723	0.106011
C20orf194_NM_001009984	C20orf194	NM_001009984	ENSG00000088854	65.3501	-0.468997	NA	129.31	-0.374113	0.197446	46.4831	-1.19627	0.0119665	94.7034	-0.873788	0.0141877	46.6192	-1.17893	0.0081881	85.1916	-1.2981	0.000210732
LRR1_NM_152329	LRR1	NM_152329	ENSG00000165501	89.8583	-0.605048	0.0753713	122.097	-0.379002	0.200527	76.2036	-0.704713	0.0787227	99.5728	-0.510097	0.131652	68.9678	-1.04196	0.00819193	92.4067	-0.745357	0.0345918
LZTR1_NM_006767	LZTR1	NM_006767	ENSG00000099949	75.3244	-0.696715	0.0604985	50.471	-0.227274	NA	66.5816	-0.678264	0.100368	38.1596	-0.564799	NA	59.402	-1.08454	0.00821104	36.2486	-0.743961	0.131769
KIAA0141_NM_001142603	KIAA0141	NM_001142603	ENSG00000081791	53.5938	-0.632508	NA	22.6488	0.00189324	NA	45.8314	-0.79858	0.0845166	19.2447	0.0296423	NA	40.0198	-1.28552	0.0082674	19.1185	0.0373285	NA
RAD17_NM_133338	RAD17	NM_133338	ENSG00000152942	72.3514	-0.39408	0.194791	28.9266	-0.228409	NA	53.4749	-0.956173	0.0331572	27.4443	-0.0176132	NA	50.8424	-1.14512	0.00831944	23.8721	-0.348919	NA
ZBTB44_NM_001301098	ZBTB44	NM_001301098	ENSG00000196323	51.8059	-0.398219	NA	63.1274	-0.123503	NA	42.2776	-0.648049	0.175273	48.4328	-0.39829	0.325144	35.4261	-1.30589	0.00833128	41.8532	-0.851529	0.0674444
EMC1_NM_001271427	EMC1	NM_001271427	ENSG00000127463	69.1034	-0.479984	0.13907	39.0291	-0.332756	NA	48.9085	-1.20888	0.00950449	34.9993	-0.238076	NA	49.2449	-1.17149	0.00835818	29.1208	-0.771725	0.143782
SNORD55_NR_000015	SNORD55	NR_000015	ENSG00000264294	75.6664	-0.406448	0.188342	96.4176	-0.344495	0.253109	56.7771	-0.899274	0.0460032	72.7453	-0.727174	0.0544752	52.5768	-1.18372	0.00835818	73.2563	-0.684604	0.0756177
MIF4GD_NM_001242500	MIF4GD	NM_001242500	ENSG00000125457	66.683	-0.491393	NA	64.4337	-0.311229	NA	51.8344	-0.881027	0.0568636	48.8901	-0.656777	0.113402	47.797	-1.18819	0.00837423	46.5036	-0.835329	0.0648816
TERC_NR_001566	TERC	NR_001566	ENSG00000277925	65.4022	-0.55047	NA	75.8304	-0.532581	0.138458	50.8402	-0.966217	0.0384723	57.1528	-0.978911	0.0214474	47.4815	-1.22658	0.00837423	54.8003	-1.16297	0.00711014
STRIP1_NM_033088	STRIP1	NM_033088	ENSG00000143093	59.078	-0.4604	NA	39.7994	0.027457	NA	46.9189	-0.780558	0.0967612	30.1668	-0.209667	NA	41.3401	-1.27269	0.00837926	27.8812	-0.415857	0.438432
MXI1_NM_001008541	MXI1	NM_001008541	ENSG00000119950	82.3002	-0.240688	0.38456	77.8063	-0.213229	0.456524	58.5589	-0.863628	0.0444692	51.8965	-0.955849	0.0269598	53.9708	-1.14236	0.00841322	52.7381	-0.890625	0.0424979
LINC01089_NR_002809	LINC01089	NR_002809	ENSG00000212694	77.5099	-0.471304	0.14033	119.079	-0.347738	0.240791	58.3242	-0.992237	0.0252296	88.5975	-0.788422	0.0342153	56.1918	-1.13412	0.00841322	82.9633	-1.03463	0.00565492
SLC25A11_NM_001165417	SLC25A11	NM_001165417	ENSG00000108528	71.789	-0.467048	0.142579	46.8866	-0.302115	NA	60.8826	-0.56265	0.182898	33.5888	-0.818377	NA	51.5514	-1.1444	0.00841322	34.4589	-0.755839	0.13097
CTSZ_NM_001336	CTSZ	NM_001336	ENSG00000101160	85.1026	-0.46948	0.135121	64.4166	-0.266841	NA	63.2224	-1.01748	0.0162672	51.3062	-0.453323	0.258588	61.7104	-1.08111	0.00841322	47.1785	-0.701751	0.119172
LINC00996_NR_034033	LINC00996	NR_034033	ENSG00000242258	67.042	-0.646864	NA	110.247	-0.715472	0.055684	54.04	-0.943658	0.0402173	84.669	-1.13761	0.00306888	51.0387	-1.14828	0.00841882	74.9659	-1.74091	4.13158e-06
RPL23_NM_000978	RPL23	NM_000978	ENSG00000125691	49.2043	-0.353391	NA	65.4259	-0.140432	NA	39.9566	-0.576322	0.238691	51.561	-0.334012	0.405504	31.8088	-1.41479	0.00843146	51.2306	-0.343883	0.438642
ZNF438_NM_001143769	ZNF438	NM_001143769	ENSG00000183621	50.4323	-0.603279	NA	92.3584	-0.48106	0.161596	38.3061	-1.13424	0.021151	66.8399	-1.06853	0.00996794	37.0354	-1.28174	0.00847787	62.7618	-1.35688	0.00107055
RNU6ATAC_NR_023344	RNU6ATAC	NR_023344	ENSG00000221676	62.0077	-0.737566	NA	41.7787	-0.180899	NA	48.3365	-1.20618	0.00927012	32.2899	-0.440469	NA	48.7295	-1.17405	0.0084832	34.5461	-0.244555	0.630313
ITPK1_NM_001142593	ITPK1	NM_001142593	ENSG00000100605	75.0798	-0.363001	0.225091	38.8717	-0.182395	NA	54.3984	-0.961277	0.0297759	36.2359	0.0156353	NA	51.6838	-1.14363	0.00854797	38.3119	0.174838	0.735646
PIEZO1_NM_001142864	PIEZO1	NM_001142864	ENSG00000103335	59.7459	-0.423597	NA	64.3808	-0.619245	NA	43.1419	-1.06225	0.0252296	49.9339	-0.995287	0.020689	41.2664	-1.25362	0.00855197	46.049	-1.33559	0.00282947
LOC101927438_NR_110224	LOC101927438	NR_110224	ENSG00000234572	82.7067	-0.323652	0.257852	83.9648	-0.315173	0.303936	60.3946	-0.880921	0.0433983	66.0612	-0.555448	0.14284	56.8301	-1.10779	0.00857264	59.1623	-0.940698	0.0233671
GGT1_NM_001288833	GGT1	NM_001288833	ENSG00000100031	44.184	-0.262618	NA	52.0028	-0.779439	NA	35.2025	-0.513772	0.295538	39.0641	-1.34111	0.0037469	27.358	-1.44069	0.00860971	37.4965	-1.54796	0.00131058
MIR425_NR_029948	MIR425	NR_029948	ENSG00000199032	107.883	-0.368586	0.185064	104.931	-0.10566	0.687193	77.0031	-1.06046	0.00778349	71.7891	-0.742763	0.0744115	76.0312	-1.05029	0.00861687	69.3834	-0.863437	0.0324669
TSSK6_NM_032037	TSSK6	NM_032037	ENSG00000178093	110.038	-0.42897	0.135121	58.7146	-0.283287	NA	86.6909	-0.757034	0.0508268	45.0708	-0.581494	0.170518	81.4016	-0.957521	0.00866113	45.0912	-0.562952	0.225141
CASP2_NM_001224	CASP2	NM_001224	ENSG00000106144	66.9678	-0.579088	NA	34.9457	0.114582	NA	56.3223	-0.714348	0.102124	27.6122	-0.0188187	NA	49.3674	-1.17577	0.00866113	26.6834	-0.0758019	NA
TNNI2_NM_003282	TNNI2	NM_003282	ENSG00000130598	56.5858	-0.350063	NA	39.9539	-0.682258	NA	40.5464	-0.947993	0.0560291	33.6575	-0.802359	NA	37.5375	-1.28271	0.00866702	28.5385	-1.4008	0.0107117
FCHSD2_NM_014824	FCHSD2	NM_014824	ENSG00000137478	78.6756	-0.478726	0.131014	110.004	-0.187651	0.470175	58.8694	-1.01953	0.0193652	74.9042	-0.884185	0.0201283	57.6588	-1.08602	0.00866702	73.0317	-0.960482	0.0113291
HOMER3_NM_001145722	HOMER3	NM_001145722	ENSG00000051128	65.705	-0.389813	NA	53.6193	0.0222256	NA	52.1151	-0.666739	0.143857	41.9586	-0.147945	0.728561	45.1855	-1.19641	0.0087148	37.3422	-0.463449	0.360322
VAMP4_NM_001185127	VAMP4	NM_001185127	ENSG00000117533	50.4217	-0.540073	NA	46.9307	-0.388565	NA	40.3028	-0.86425	0.0769055	34.1356	-0.866127	NA	35.7657	-1.3114	0.00872282	36.6022	-0.668751	0.176073
ZNF236_NM_001306089	ZNF236	NM_001306089	ENSG00000130856	71.6478	-0.3856	0.202599	72.0709	-0.316772	NA	51.388	-1.05298	0.0226658	55.2484	-0.646262	0.132254	50.0748	-1.14063	0.00873054	47.74	-1.20584	0.00749841
DBIL5P_NR_024120	DBIL5P	NR_024120	ENSG00000231784	52.4209	-0.411475	NA	42.3564	-0.542826	NA	36.756	-1.16461	0.0185294	30.6094	-1.14488	NA	35.7135	-1.28763	0.0087536	31.3576	-1.11725	0.0349207
SFT2D2_NM_199344	SFT2D2	NM_199344	ENSG00000213064	54.8746	-0.589281	NA	41.8701	-0.134821	NA	43.3353	-0.987278	0.0378885	33.0476	-0.323637	NA	40.6943	-1.24507	0.008761	33.0313	-0.342704	0.515974
CDC123_NM_006023	CDC123	NM_006023	ENSG00000151465	104.796	-0.494899	0.11322	81.4805	-0.466823	0.16314	80.9697	-0.902689	0.0217075	68.0727	-0.538647	0.14906	77.7642	-1.01226	0.00881011	61.6395	-0.841787	0.0418882
PSMA4_NM_001102667	PSMA4	NM_001102667	ENSG00000041357	60.5768	-0.37725	NA	35.5641	-0.188303	NA	41.7402	-1.20715	0.0139278	29.1587	-0.308885	NA	41.352	-1.23182	0.00881291	25.6782	-0.618758	NA
IGLL5_NM_001178126	IGLL5	NM_001178126	ENSG00000254709	56.1405	-0.954242	NA	51.3874	-0.817193	NA	43.9939	-1.4477	0.00271752	40.2818	-1.22376	0.00803159	47.0493	-1.17512	0.00881291	43.2336	-0.961491	0.0372104
HNRNPR_NM_001102397	HNRNPR	NM_001102397	ENSG00000125944	70.1854	-0.490632	0.135105	70.4579	-0.340137	NA	53.6875	-0.934331	0.0353904	56.6147	-0.523734	0.183549	50.8233	-1.13482	0.00891917	45.9853	-1.23853	0.00746965
NUCB2_NM_005013	NUCB2	NM_005013	ENSG00000070081	96.6119	-0.412781	0.152401	96.8257	-0.512394	0.131326	73.8202	-0.843512	0.0363287	76.2853	-0.787724	0.0384743	69.7883	-1.02093	0.00893471	69.9387	-1.12467	0.00414817
SLC16A1-AS1_NR_103743	SLC16A1-AS1	NR_103743	ENSG00000226419	58.8689	-0.166943	NA	48.0319	-0.470674	NA	43.8684	-0.599918	0.19118	38.9432	-0.643451	0.143759	36.329	-1.28011	0.00896516	39.4455	-0.625284	0.19709
MAP4K1_NM_001042600	MAP4K1	NM_001042600	ENSG00000104814	80.0547	-0.622565	0.0753713	61.2302	-0.345634	NA	63.6834	-0.969794	0.0236634	47.1183	-0.667459	0.111276	61.4944	-1.07118	0.00896516	43.8462	-0.861797	0.0800956
MYADM_NM_001020819	MYADM	NM_001020819	ENSG00000179820	58.0274	-0.460862	NA	61.4115	-0.117992	NA	52.7554	-0.34122	0.435201	51.2647	-0.162595	0.68766	40.4699	-1.24534	0.00896516	42.701	-0.655866	0.162695
ZSCAN21_NM_145914	ZSCAN21	NM_145914	ENSG00000166529	49.4209	-0.695341	NA	35.9208	-0.252767	NA	39.7106	-1.02778	0.0391098	33.1194	-0.0691821	NA	37.5169	-1.26402	0.00897945	30.9458	-0.228021	0.666637
TROVE2_NM_001173524	TROVE2	NM_001173524	ENSG00000116747	67.071	-0.328245	NA	37.0127	-0.290199	NA	47.4145	-1.02086	0.0266216	30.1395	-0.43898	NA	45.37	-1.18508	0.00898627	31.8448	-0.260312	0.618238
HEXIM2_NM_001303442	HEXIM2	NM_001303442	ENSG00000168517	96.5652	-0.349004	0.208721	45.0927	-0.39438	NA	75.0663	-0.701445	0.0787227	43.1254	-0.131205	0.752768	68.555	-1.01803	0.00899689	34.8915	-0.729297	0.142186
RPL15_NM_001253380	RPL15	NM_001253380	ENSG00000174748	64.3791	-0.426284	NA	36.1818	-0.0833506	NA	50.4119	-0.779914	0.0808518	29.764	-0.158578	NA	45.2059	-1.18086	0.00899689	24.9012	-0.62528	NA
COG4_NM_001195139	COG4	NM_001195139	ENSG00000103051	108.665	-0.230485	0.377573	57.2459	-0.131206	NA	79.1636	-0.776315	0.0508268	54.8362	0.172858	0.660528	74.195	-0.991074	0.00902462	45.3489	-0.287438	0.533499
HOMER3_NM_001145721	HOMER3	NM_001145721	ENSG00000051128	64.2229	-0.397165	NA	55.315	0.0311629	NA	51.2049	-0.65962	0.149203	42.7356	-0.165117	0.699099	44.2937	-1.19715	0.0090897	36.6739	-0.598781	0.238573
NCF2_NM_001127651	NCF2	NM_001127651	ENSG00000116701	58.2005	-0.695644	NA	50.4578	-0.674376	NA	47.1991	-0.984842	0.0330367	41.2138	-0.902533	0.0466305	44.8875	-1.18549	0.00913655	41.9797	-0.857819	0.069035
CLDN7_NM_001185023	CLDN7	NM_001185023	ENSG00000181885	84.4127	-0.362922	0.235171	45.6414	-0.284421	NA	60.5467	-1.00271	0.0208835	32.7627	-0.783908	NA	59.0753	-1.08118	0.00913655	32.3448	-0.810974	0.12752
TRAF3IP2-AS1_NR_034108	TRAF3IP2-AS1	NR_034108	N/A	59.2131	-0.38455	NA	61.992	-0.431608	NA	43.8792	-0.909795	0.0650743	49.7056	-0.643336	0.128513	40.5413	-1.22369	0.00913655	41.9438	-1.2738	0.00695448
LOC101927964_NR_120632	LOC101927964	NR_120632	ENSG00000236990	45.0703	-0.453178	NA	42.2185	-0.29476	NA	32.2837	-1.14867	0.0290552	36.0238	-0.334392	NA	30.5172	-1.39651	0.00915692	30.404	-0.855692	0.112772
TXNIP_NM_006472	TXNIP	NM_006472	ENSG00000265972	76.8113	-0.505967	0.121812	54.7387	-0.0998688	NA	56.3985	-1.13677	0.0102579	48.4732	0.00273864	0.9952	56.6968	-1.09689	0.00916483	43.456	-0.26849	0.587069
PSMD7_NM_002811	PSMD7	NM_002811	ENSG00000103035	56.5009	-0.466238	NA	47.7908	-0.187019	NA	50.1653	-0.452143	0.306375	38.3734	-0.357324	NA	40.1007	-1.23863	0.00917446	33.5559	-0.751335	0.140981
HIST1H2BN_NM_003520	HIST1H2BN	NM_003520	ENSG00000233822	120.237	-0.577423	0.0753713	125.964	-0.620145	0.0842598	88.6406	-1.23336	0.00153447	101.073	-0.856671	0.0229298	94.5445	-0.924408	0.00917446	111.023	-0.517069	0.156535
TMEM216_NM_001173990	TMEM216	NM_001173990	ENSG00000187049	62.7576	-0.329796	NA	59.9147	-0.504485	NA	45.5959	-0.915184	0.0485812	46.872	-0.818072	0.056346	42.0185	-1.22048	0.00920508	45.3236	-0.933414	0.0395385
GBAP1_NR_002188	GBAP1	NR_002188	ENSG00000160766	61.4876	-0.473259	NA	63.1697	-0.435765	NA	48.5756	-0.800896	0.0769187	48.3194	-0.80133	0.0597379	43.8216	-1.18885	0.00925884	46.1219	-0.950688	0.0358813
COX5B_NM_001862	COX5B	NM_001862	ENSG00000135940	49.1514	-0.722246	NA	32.6304	0.087257	NA	39.6232	-1.07237	0.0268439	25.2318	-0.0977533	NA	37.1905	-1.29826	0.00925884	25.9969	0.000320946	NA
GART_NM_000819	GART	NM_000819	ENSG00000159131	76.1928	-0.520565	0.116911	61.0806	-0.368853	NA	61.6773	-0.795408	0.0663301	51.8639	-0.416545	0.305974	56.7477	-1.09241	0.00925884	47.25	-0.711171	0.130726
CTC-436P18.1_NR_109908	CTC-436P18.1	NR_109908	ENSG00000251279	52.933	-0.48385	NA	53.9152	-0.258102	NA	40.7532	-0.940272	0.0592937	39.492	-0.707117	0.10889	37.5677	-1.27995	0.00925884	35.2138	-1.13149	0.0215963
MIR4655_NR_039799	MIR4655	NR_039799	ENSG00000265089	71.618	-0.563202	0.106641	108.101	-0.617928	0.0797065	46.2907	-1.83765	7.56112e-05	72.9007	-1.59713	6.1229e-05	53.6507	-1.10878	0.00930362	71.7904	-1.70404	6.78616e-06
RPS27_NM_001030	RPS27	NM_001030	ENSG00000177954	53.2657	-0.470773	NA	57.5032	-0.0556896	NA	45.7878	-0.572022	0.210293	41.0575	-0.525538	0.234966	37.803	-1.28022	0.00932555	38.6455	-0.698281	0.157302
DOCK6_NM_020812	DOCK6	NM_020812	ENSG00000130158	70.2995	-0.0869077	0.765486	44.8622	0.0553371	NA	46.0064	-0.912834	0.0487455	33.0117	-0.24178	NA	42.6331	-1.20374	0.00932555	33.0424	-0.22761	0.662205
GIT2_NM_001135213	GIT2	NM_001135213	ENSG00000139436	58.8079	-0.673648	NA	54.2209	-0.140067	NA	49.026	-0.863397	0.0595847	41.4105	-0.417571	0.32523	45.0106	-1.18784	0.00934895	41.0379	-0.435501	0.360111
TSHZ1_NM_005786	TSHZ1	NM_005786	ENSG00000179981	90.4987	-0.349781	0.214688	64.4484	-0.199367	NA	69.7338	-0.736209	0.0788736	50.7595	-0.416351	0.296473	63.8011	-1.03869	0.00942126	45.0673	-0.78757	0.0833321
CD63_NM_001257390	CD63	NM_001257390	ENSG00000135404	59.7471	-0.548135	NA	53.7015	0.0477946	NA	48.1337	-0.828594	0.0694699	40.3906	-0.208125	0.626054	43.7188	-1.18696	0.00945181	37.0255	-0.444486	0.366082
UPF3A_NM_023011	UPF3A	NM_023011	ENSG00000169062	100.854	-0.189012	0.477457	47.8354	-0.274119	NA	82.1341	-0.380404	0.335189	42.7689	-0.164906	0.696298	67.4489	-1.03777	0.0094679	36.0977	-0.646095	0.21392
CCNE1_NM_001238	CCNE1	NM_001238	ENSG00000105173	88.8639	-0.399558	0.182682	39.1959	-0.148712	NA	66.0768	-0.924219	0.0300252	34.0549	-0.113091	NA	63.8822	-1.03151	0.00948011	35.3301	0.0213816	0.969719
SPATA24_NM_194296	SPATA24	NM_194296	ENSG00000170469	51.6752	-0.456276	NA	26.1357	-0.0576185	NA	43.6509	-0.564668	0.22214	23.9172	0.0971771	NA	35.0077	-1.34295	0.00948011	20.3303	-0.256806	NA
PNN_NM_002687	PNN	NM_002687	ENSG00000100941	49.119	-0.276863	NA	68.7754	-0.433827	NA	38.6575	-0.585347	0.22927	49.3927	-1.02492	0.0202476	31.1427	-1.37746	0.00948408	51.2333	-0.848175	0.0621325
ARF6_NM_001663	ARF6	NM_001663	ENSG00000165527	75.3756	-0.408094	0.187647	89.4996	-0.335257	0.269862	57.0212	-0.880994	0.0508268	64.1615	-0.896289	0.0242456	52.9253	-1.1453	0.00949111	68.2223	-0.672561	0.0867689
C1orf220_NR_033186	C1orf220	NR_033186	ENSG00000213057	51.9331	-0.475198	NA	25.7161	0.0803157	NA	36.8552	-1.22198	0.0157674	17.9358	-0.317873	NA	36.3463	-1.30305	0.00949217	20.1963	-0.0310497	NA
SP1_NM_001251825	SP1	NM_001251825	ENSG00000185591	46.6898	-0.597011	NA	29.1618	-0.13929	NA	36.4831	-1.02352	0.0416591	25.8917	-0.0497177	NA	33.8761	-1.36653	0.00952563	21.0728	-0.564381	NA
TEP1_NM_007110	TEP1	NM_007110	ENSG00000129566	52.5239	-0.527347	NA	35.8058	-0.0352075	NA	45.1496	-0.606692	0.204279	28.0342	-0.221033	NA	37.3529	-1.31853	0.00952563	27.1407	-0.275875	NA
TUSC3_NM_006765	TUSC3	NM_006765	ENSG00000104723	23.6562	0.747723	NA	20.9171	0.245346	NA	19.6152	0.879776	NA	17.7589	0.306964	NA	24.9459	1.42097	0.00952563	19.4411	0.564354	NA
C1orf101_NM_001130957	C1orf101	NM_001130957	ENSG00000179397	62.0561	-0.516812	NA	54.4021	-0.56432	NA	45.4798	-1.1712	0.0137569	40.1353	-1.11821	0.0148736	45.3378	-1.18405	0.00954855	40.0674	-1.14382	0.0148086
AMICA1_NM_001286571	AMICA1	NM_001286571	ENSG00000160593	58.3884	-0.291191	NA	51.3408	0.0622209	NA	44.7168	-0.657692	0.160614	42.2299	0.0132123	0.975505	38.1741	-1.25402	0.00956981	36.9875	-0.293199	0.560574
SNORD42B_NR_000013	SNORD42B	NR_000013	ENSG00000238423	71.8988	-0.437687	0.167307	61.664	-0.286318	NA	54.0628	-0.933232	0.0366674	52.4369	-0.3209	0.442676	51.2534	-1.13156	0.00957751	48.5516	-0.537155	0.260883
ACLY_NM_001303274	ACLY	NM_001303274	ENSG00000131473	55.6544	-0.73516	NA	45.5752	-0.149222	NA	41.4847	-1.38261	0.00452298	34.3497	-0.490279	NA	43.2261	-1.21018	0.00958833	30.7172	-0.819426	0.116231
RHBDD3_NM_012265	RHBDD3	NM_012265	ENSG00000100263	82.3779	-0.328751	0.25897	72.6467	-0.290885	NA	61.7758	-0.796279	0.0607215	52.1897	-0.818866	0.0489924	57.1161	-1.07491	0.00958833	56.5932	-0.550822	0.195545
MPPE1_NM_001242904	MPPE1	NM_001242904	ENSG00000154889	65.8502	-0.452457	NA	61.5052	-0.344302	NA	52.4992	-0.750781	0.0909541	50.0572	-0.512247	0.225787	46.7441	-1.16727	0.00960934	46.5174	-0.74566	0.106379
CCAR2_NR_033902	CCAR2	NR_033902	ENSG00000158941	100.09	-0.466301	0.121812	50.75	-0.084766	NA	80.4727	-0.731245	0.0639803	44.0332	-0.0430036	0.918331	74.2683	-0.991929	0.00961003	39.1866	-0.348687	0.492003
ZNF615_NM_001199324	ZNF615	NM_001199324	ENSG00000197619	79.3201	-0.31142	0.293864	50.0891	-0.0327855	NA	66.9862	-0.415464	0.314549	44.8948	0.111457	0.785511	54.4012	-1.12329	0.00962793	40.1187	-0.154508	0.754448
LONRF1_NM_152271	LONRF1	NM_152271	ENSG00000154359	72.8252	-0.282027	0.324686	84.4419	-0.351858	0.264509	48.4695	-1.19083	0.0118847	60.2998	-0.922165	0.0235547	48.9465	-1.14492	0.00962793	60.5156	-0.897253	0.0283143
MIR142_NR_029683	MIR142	NR_029683	ENSG00000284353	129.031	-0.324589	0.208139	86.6294	-0.117269	0.659973	99.0438	-0.716295	0.0553317	69.5534	-0.257873	0.479129	91.593	-0.952305	0.00966473	61.5116	-0.614172	0.132648
SQSTM1_NM_001142299	SQSTM1	NM_001142299	ENSG00000161011	36.6912	-0.465701	NA	37.399	0.26979	NA	27.4224	-1.00924	NA	24.5867	-0.22991	NA	24.838	-1.44343	0.00967275	23.0247	-0.376309	NA
WT1_NM_000378	WT1	NM_000378	ENSG00000184937	72.9548	-0.506189	0.121992	63.7455	-0.61498	NA	55.0501	-1.00836	0.0216314	47.7089	-1.11425	0.0112006	53.5704	-1.09724	0.00973373	42.2317	-1.32047	0.0465808
SKA3_NM_001166017	SKA3	NM_001166017	ENSG00000165480	66.0148	-0.542727	NA	41.2439	-0.413796	NA	54.7876	-0.730433	0.0929641	39.0536	-0.185125	0.667255	48.9986	-1.13284	0.0097493	34.4992	-0.484775	0.354906
ATP5J2_NM_001003713	ATP5J2	NM_001003713	ENSG00000241468	50.294	-0.21462	NA	51.4804	-0.583598	NA	41.1776	-0.401001	0.38744	43.9999	-0.61752	0.148926	31.4806	-1.3333	0.00975518	40.3234	-0.90984	0.0564071
NNT_NM_182977	NNT	NM_182977	ENSG00000112992	79.7664	-0.295572	0.310339	101.228	-0.491647	0.137535	56.4302	-0.970255	0.0321814	73.3246	-1.07185	0.00522836	53.8859	-1.15229	0.0098158	69.537	-1.3104	0.000629439
GLRX5_NM_016417	GLRX5	NM_016417	ENSG00000182512	44.0354	-0.554617	NA	41.5795	-0.417958	NA	33.6716	-1.02403	0.0428058	34.2613	-0.527653	NA	31.3367	-1.33031	0.00982624	32.7045	-0.707413	0.170987
TMEM97_NM_014573	TMEM97	NM_014573	ENSG00000109084	54.6755	-0.478453	NA	60.8304	-0.336359	NA	41.7847	-0.917197	0.0548065	45.3574	-0.753733	0.0821438	38.5945	-1.23509	0.00982782	43.5485	-0.891633	0.0572289
SNX5_NM_001282454	SNX5	NM_001282454	ENSG00000089006	86.7185	-0.315879	0.265068	99.5558	-0.248413	0.375442	72.2583	-0.43392	0.275698	67.5984	-0.978218	0.013278	60.0362	-1.07432	0.00982782	67.3084	-0.977966	0.0126621
CUL4A_NM_001008895	CUL4A	NM_001008895	ENSG00000139842	64.0793	-0.402932	NA	45.1525	-0.364709	NA	49.46	-0.786319	0.084792	36.5097	-0.541899	NA	44.5678	-1.19274	0.00988231	37.4638	-0.467491	0.337733
USF1_NM_007122	USF1	NM_007122	ENSG00000158773	94.4874	-0.250779	0.366646	80.8596	-0.311978	0.309979	72.9816	-0.607982	0.149656	67.2851	-0.378001	0.302422	63.6675	-1.0803	0.00988436	53.027	-1.22373	0.00419306
TMA16_NM_018352	TMA16	NM_018352	ENSG00000198498	66.5668	-0.449615	NA	70.7616	-0.0463746	NA	50.4416	-0.923097	0.0421791	46.5318	-0.792341	0.0652825	47.4193	-1.1598	0.00992058	45.1483	-0.901007	0.0465808
LDLRAD4_NM_001003674	LDLRAD4	NM_001003674	ENSG00000168675	72.2129	-0.438759	0.171037	107.979	-0.578031	0.0924988	53.2179	-1.02602	0.0273604	70.0555	-1.7481	7.10682e-06	51.0389	-1.17427	0.00993201	78.0324	-1.21062	0.000903892
RAD17_NM_133342	RAD17	NM_133342	ENSG00000152942	76.3126	-0.334361	0.249928	31.7265	-0.350144	NA	56.4824	-0.865158	0.0520579	29.2084	-0.207507	NA	52.8825	-1.10786	0.00995656	28.8013	-0.236589	0.671935
ZC3H6_NM_198581	ZC3H6	NM_198581	ENSG00000188177	83.044	-0.193796	0.491775	89.4215	-0.35787	0.261162	60.4473	-0.730068	0.107406	62.6544	-1.02903	0.0143301	53.4891	-1.16485	0.00999868	62.9707	-1.0184	0.0153853
DPH6-AS1_NR_038251	DPH6-AS1	NR_038251	ENSG00000248079	48.3798	-0.474509	NA	42.4816	-0.41942	NA	38.6913	-0.780521	0.104712	33.4215	-0.708983	NA	33.8686	-1.28895	0.0100258	37.4457	-0.37997	0.443891
FOXJ3_NM_001198852	FOXJ3	NM_001198852	ENSG00000198815	72.7391	-0.117316	0.672771	101.531	-0.255564	0.363592	49.806	-0.828777	0.0681513	69.8602	-0.950924	0.0148736	45.0838	-1.18598	0.0100574	65.4117	-1.2104	0.00193694
NCBP2-AS2_NR_024388	NCBP2-AS2	NR_024388	N/A	68.493	-0.365824	NA	44.8744	-0.29211	NA	52.0965	-0.801832	0.0707074	42.7817	-0.0221762	0.958896	47.4796	-1.15116	0.0100969	34.7413	-0.575394	0.248204
ACLY_NM_001096	ACLY	NM_001096	ENSG00000131473	55.2216	-0.740075	NA	45.5752	-0.149222	NA	41.2971	-1.37553	0.00473481	34.3497	-0.490279	NA	43.0418	-1.20253	0.0101105	30.7172	-0.819426	0.116231
ZSCAN26_NM_001287421	ZSCAN26	NM_001287421	ENSG00000197062	61.5487	-0.286899	NA	54.6681	-0.516994	NA	45.8119	-0.770642	0.103219	45.217	-0.646387	0.133552	40.5319	-1.22396	0.0101155	42.8497	-0.826927	0.0755354
TIMM50_NM_001001563	TIMM50	NM_001001563	ENSG00000105197	71.1553	-0.351084	0.241777	62.3343	-0.219303	NA	52.0111	-0.925624	0.0404762	49.6551	-0.402424	0.315969	49.1106	-1.14749	0.0101183	44.4127	-0.727564	0.114255
LOC730102_NR_037167	LOC730102	NR_037167	ENSG00000242193	49.3878	-0.360208	NA	33.9396	-0.129158	NA	37.5798	-0.799943	0.100902	27.3254	-0.288472	NA	32.965	-1.31602	0.0101209	26.0066	-0.414643	NA
C17orf49_NM_001142798	C17orf49	NM_001142798	ENSG00000258315	64.1491	-0.327812	NA	42.5459	0.0656193	NA	51.2278	-0.584337	0.185718	30.1767	-0.335674	NA	43.2072	-1.18152	0.0101927	27.8612	-0.57443	0.294764
CCND3_NM_001136125	CCND3	NM_001136125	ENSG00000112576	58.6287	-0.538055	NA	82.4949	-0.40713	0.215936	47.6187	-0.793849	0.0971877	65.1681	-0.632277	0.105395	42.3467	-1.2259	0.010198	57.5577	-1.07829	0.00994258
MLC1_NM_015166	MLC1	NM_015166	ENSG00000100427	88.3972	-0.489279	0.131329	107.694	-0.344281	0.247493	69.2852	-0.854838	0.0508268	78.8564	-0.842664	0.0302383	65.1207	-1.08235	0.0102081	64.7724	-1.72911	1.392e-05
GCHFR_NM_005258	GCHFR	NM_005258	ENSG00000137880	53.7159	-0.421593	NA	53.9872	-0.160132	NA	39.6342	-0.946388	0.0551422	42.649	-0.346126	0.406909	36.1865	-1.30202	0.0102173	39.4463	-0.555319	0.249006
TNKS2-AS1_NR_108071	TNKS2-AS1	NR_108071	ENSG00000228701	48.7433	-0.559865	NA	37.118	-0.308289	NA	36.3726	-1.12083	0.0244103	31.4439	-0.385495	NA	35.2818	-1.27861	0.0102314	28.7958	-0.650409	0.246213
KIF2C_NM_001297655	KIF2C	NM_001297655	ENSG00000142945	40.0228	-0.831392	NA	47.5482	-0.0182033	NA	37.3369	-0.699541	0.151897	39.6899	-0.0421424	0.922278	31.2457	-1.34795	0.0102674	35.9052	-0.25732	0.614178
MIR4664_NR_039810	MIR4664	NR_039810	ENSG00000265660	41.8015	-0.749512	NA	69.791	-0.287329	NA	34.4794	-1.00882	0.0444511	58.893	-0.310568	0.415329	31.9113	-1.3187	0.0102674	54.1612	-0.523337	0.238573
CYP4V2_NM_207352	CYP4V2	NM_207352	ENSG00000145476	59.1281	-0.580266	NA	56.612	-0.124672	NA	50.9865	-0.649897	0.142033	37.4059	-0.868326	NA	43.9048	-1.17954	0.0102761	36.4211	-0.982884	0.0459977
RRAS_NM_006270	RRAS	NM_006270	ENSG00000126458	57.911	-0.456582	NA	35.4899	0.22207	NA	43.6684	-0.928832	0.049688	34.4587	0.551385	NA	40.8992	-1.20896	0.0102814	27.2478	0.119788	0.834428
ITGB1_NM_002211	ITGB1	NM_002211	ENSG00000150093	78.6735	-0.280373	0.316136	38.5988	-0.262975	NA	52.0904	-1.21644	0.00674617	33.014	-0.291888	NA	53.3861	-1.09049	0.0102908	34.2876	-0.162787	0.753413
KDELC2_NM_153705	KDELC2	NM_153705	ENSG00000178202	63.6894	-0.231147	NA	72.7718	-0.109039	NA	43.9409	-0.939347	0.0488574	48.7606	-0.805289	0.0563212	40.962	-1.2176	0.0102985	45.9745	-1.02499	0.0219742
TMEM55B_NM_001100814	TMEM55B	NM_001100814	ENSG00000165782	69.4648	-0.519529	0.121812	54.4649	-0.227844	NA	52.5502	-1.03103	0.0233277	45.5133	-0.290096	0.483275	51.1192	-1.13858	0.0103348	45.1364	-0.298298	0.525333
GABPB1-AS1_NR_024490	GABPB1-AS1	NR_024490	N/A	121.906	-0.195279	0.451051	158.448	-0.188617	0.431911	102.619	-0.275487	0.483018	119.736	-0.538341	0.0983932	82.2536	-0.982947	0.0104196	102.326	-1.105	0.000803818
KDM3A_NM_018433	KDM3A	NM_018433	ENSG00000115548	69.9846	-0.297585	0.304138	25.0248	-0.304913	NA	54.6675	-0.625645	0.15074	17.4722	-0.861435	NA	47.0273	-1.17748	0.010424	19.7318	-0.552991	NA
TOB2P1_NR_002936	TOB2P1	NR_002936	N/A	38.7511	-0.450676	NA	57.2044	-0.626844	NA	32.1876	-0.645719	0.207406	46.7885	-0.818059	0.055969	26.2021	-1.40886	0.010424	41.9128	-1.22172	0.00895279
SPAG9_NM_001130527	SPAG9	NM_001130527	ENSG00000008294	55.4146	-0.255312	NA	34.0539	-0.351342	NA	43.182	-0.604363	0.21126	27.3243	-0.541641	NA	35.6532	-1.2908	0.0104601	27.0116	-0.609137	NA
VEGFA_NM_001287044	VEGFA	NM_001287044	ENSG00000112715	65.5474	-0.573559	NA	80.4874	-0.624531	0.092804	52.7072	-0.837389	0.0763913	61.8627	-1.01454	0.012491	48.9673	-1.13958	0.0105043	55.5793	-1.45815	0.000605688
PDSS1_NM_014317	PDSS1	NM_014317	ENSG00000148459	66.6605	-0.258296	NA	58.4325	-0.255503	NA	50.7874	-0.661189	0.137235	42.7697	-0.694333	0.11466	44.0269	-1.17053	0.0105236	40.1286	-0.907361	0.0627514
OSM_NM_020530	OSM	NM_020530	ENSG00000099985	79.7448	-0.28294	0.320587	115.655	-0.488339	0.130235	59.3251	-0.766181	0.0770384	78.5124	-1.36382	0.000292379	54.0524	-1.09976	0.010537	77.9644	-1.40237	0.000108069
MIR4740_NR_039894	MIR4740	NR_039894	ENSG00000266392	208.799	-0.169902	0.433335	210.837	-0.258506	0.289953	151.146	-0.726398	0.0297611	151.795	-0.793378	0.0113971	147.699	-0.770733	0.0105991	147.797	-0.865646	0.00313252
FCMR_NM_001193338	FCMR	NM_001193338	ENSG00000162894	71.3365	-0.75372	0.0581549	55.0379	-0.426379	NA	53.5329	-1.36357	0.00263336	45.3886	-0.540247	0.196869	57.33	-1.07743	0.0106101	43.8716	-0.639021	0.164689
RCOR3_NM_001136223	RCOR3	NM_001136223	ENSG00000117625	71.1636	-0.451489	0.152401	38.9959	-0.274316	NA	59.1329	-0.605286	0.161024	30.4486	-0.532848	NA	51.3362	-1.1116	0.0106201	27.5911	-0.851986	0.114543
C9orf106_NM_001012715	C9orf106	NM_001012715	N/A	62.5445	-0.712104	NA	46.5452	-0.538089	NA	45.7357	-1.42889	0.00268617	40.8176	-0.513013	0.234451	49.049	-1.12823	0.0106493	38.7407	-0.669678	0.164987
SECISBP2_NM_001282688	SECISBP2	NM_001282688	ENSG00000187742	74.4416	-0.545085	0.10806	37.6646	-0.400618	NA	54.1438	-1.235	0.00643302	29.2886	-0.695097	NA	55.6927	-1.09513	0.010689	34.8252	-0.215477	0.681975
NOP56_NM_006392	NOP56	NM_006392	ENSG00000101361	63.226	-0.407395	NA	57.1529	-0.338662	NA	46.9265	-0.963671	0.0404762	41.6014	-0.836353	0.0581376	44.292	-1.20516	0.0106915	40.1806	-0.985425	0.0378475
FAM83C-AS1_NR_109815	FAM83C-AS1	NR_109815	ENSG00000235214	57.6358	-0.480965	NA	35.7771	-0.277582	NA	44.0894	-0.932125	0.0485121	29.8139	-0.368278	NA	40.921	-1.21528	0.010698	33.8194	-0.0319775	0.953736
SNX32_NM_152760	SNX32	NM_152760	ENSG00000172803	58.5051	-0.449207	NA	29.0251	-0.287579	NA	42.9211	-1.06335	0.0273604	24.3577	-0.340246	NA	41.5449	-1.1985	0.0107088	22.6674	-0.530855	NA
ZNF70_NM_021916	ZNF70	NM_021916	ENSG00000187792	66.6732	-0.536615	NA	29.2038	-0.124362	NA	54.223	-0.790513	0.0713505	24.8962	-0.156556	NA	49.5918	-1.12225	0.0107428	22.1751	-0.415429	NA
ZFY_NM_001145275	ZFY	NM_001145275	ENSG00000067646	55.0089	-0.0866746	NA	58.1701	-0.392064	NA	37.5386	-0.765854	0.122961	44.3115	-0.778808	0.0779636	32.6483	-1.3072	0.0107873	39.8939	-1.16053	0.0145538
TAGLN2_NM_001277223	TAGLN2	NM_001277223	ENSG00000158710	78.0741	-0.182878	0.502661	51.7516	-0.275947	NA	55.3425	-0.80536	0.0648139	43.9313	-0.28606	0.492298	50.834	-1.10493	0.0108209	40.0897	-0.544541	0.256768
MIR3656_NR_037429	MIR3656	NR_037429	ENSG00000283704	57.4014	-0.417068	NA	23.7316	-0.0359333	NA	45.4742	-0.748034	0.10775	20.6628	0.0286884	NA	39.9679	-1.21463	0.0108209	20.1176	0.0203678	NA
SET_NM_003011	SET	NM_003011	ENSG00000119335	66.1658	-0.278269	NA	25.5913	-0.0177741	NA	46.8834	-0.933337	0.0416591	17.9539	-0.420645	NA	43.7308	-1.17991	0.0108587	17.7458	-0.454648	NA
TGIF1_NM_001278684	TGIF1	NM_001278684	ENSG00000177426	90.3565	-0.351934	0.216286	128.703	-0.429971	0.152164	73.3379	-0.57442	0.171899	92.8348	-1.00642	0.00489588	64.181	-1.02333	0.0108638	85.6409	-1.35514	0.000107676
CDKL3_NM_001113575	CDKL3	NM_001113575	ENSG00000006837	49.4097	-0.664739	NA	16.9598	-0.0437953	NA	40.865	-0.926632	0.0671373	13.7631	-0.115674	NA	37.1077	-1.3196	0.0108717	13.725	-0.128555	NA
IDH3B_NM_001258384	IDH3B	NM_001258384	ENSG00000101365	55.2118	-0.500887	NA	34.5781	0.0516246	NA	42.165	-0.962575	0.0508268	31.6749	0.232164	NA	39.6599	-1.2112	0.0108792	34.2206	0.460582	0.36323
HIPK1_NM_152696	HIPK1	NM_152696	ENSG00000163349	65.9649	-0.153053	NA	56.4112	-0.182156	NA	48.2422	-0.648078	0.149656	43.7486	-0.42322	0.32362	41.4137	-1.18963	0.0108931	35.4958	-1.10552	0.0304479
MEMO1_NM_001301833	MEMO1	NM_001301833	ENSG00000162959	65.5738	-0.681627	NA	28.553	-0.485379	NA	57.2344	-0.729462	0.100902	25.2268	-0.479815	NA	51.0903	-1.13485	0.0108931	22.4633	-0.837893	NA
TMEM116_NM_001193453	TMEM116	NM_001193453	ENSG00000198270	78.543	-0.457192	0.141178	82.1513	-0.309604	0.309979	58.0511	-1.02838	0.017638	59.4982	-0.822288	0.0403944	57.547	-1.05372	0.0109185	55.6977	-1.04776	0.0133662
PGAP3_NM_001291726	PGAP3	NM_001291726	ENSG00000161395	75.2062	-0.499129	0.127726	44.532	-0.347291	NA	56.6612	-1.0045	0.0213922	35.3627	-0.589511	NA	55.6093	-1.07079	0.0110517	34.6103	-0.656504	0.190284
FAM161A_NM_001201543	FAM161A	NM_001201543	ENSG00000170264	59.5379	-0.525449	NA	26.8144	0.0129353	NA	43.3451	-1.18522	0.0125961	18.8235	-0.377487	NA	43.504	-1.16609	0.0110821	22.2231	0.0270893	NA
JARID2_NM_004973	JARID2	NM_004973	ENSG00000008083	52.0678	-0.428341	NA	78.4291	-0.119138	0.676273	39.7282	-0.889688	0.0716949	60.365	-0.389895	0.334723	36.0401	-1.27649	0.0111023	53.9253	-0.733378	0.105672
DRAM2_NM_178454	DRAM2	NM_178454	ENSG00000156171	47.8507	-0.490898	NA	65.5035	-0.304612	NA	43.138	-0.421905	0.353308	47.8719	-0.776132	0.0662135	33.3366	-1.29956	0.0111131	48.081	-0.772339	0.0864881
TM2D3_NM_001307960	TM2D3	NM_001307960	ENSG00000184277	47.8545	-0.504298	NA	40.0076	-0.0358544	NA	37.8458	-0.837501	0.0848639	28.7954	-0.451361	NA	33.8264	-1.2945	0.0111229	29.2265	-0.417288	0.436758
STT3B_NM_178862	STT3B	NM_178862	ENSG00000163527	93.0778	-0.48858	0.121992	53.4809	-0.35045	NA	74.7709	-0.765758	0.0746281	42.2238	-0.584532	0.173921	68.9936	-1.05869	0.0111234	42.7075	-0.564704	0.229736
PITX1_NM_002653	PITX1	NM_002653	ENSG00000069011	107.354	-0.000766218	0.998022	103.863	-0.225944	0.409179	78.1407	-0.475175	0.225393	72.0789	-0.851503	0.0285064	65.6892	-1.04493	0.0111234	72.6681	-0.81706	0.0317482
SMIM7_NM_001300925	SMIM7	NM_001300925	ENSG00000214046	55.2042	-0.601662	NA	37.7077	0.152634	NA	44.5532	-0.883273	0.0584948	28.3393	-0.0844659	NA	40.1436	-1.25441	0.0111632	33.4658	0.314491	0.538916
TMEM187_NM_003492	TMEM187	NM_003492	ENSG00000177854	78.9972	-0.292793	0.298782	94.8889	-0.304389	0.304487	57.3428	-0.869527	0.0446756	67.1672	-0.913137	0.0215902	54.1342	-1.07207	0.0112046	59.9108	-1.41214	0.000750322
DLEU7_NM_001306135	DLEU7	NM_001306135	ENSG00000186047	60.4607	-0.652096	NA	28.098	-0.397405	NA	51.7587	-0.759304	0.104821	22.1854	-0.663909	NA	45.9535	-1.20767	0.0112195	18.6497	-1.26693	NA
ITGAE_NM_002208	ITGAE	NM_002208	ENSG00000083457	55.0308	-0.620017	NA	76.995	-0.743042	0.0587173	43.1315	-1.04395	0.0269419	62.8603	-0.95504	0.0173442	41.7716	-1.17834	0.0112736	56.3753	-1.40149	0.000739323
IQCG_NM_001134435	IQCG	NM_001134435	ENSG00000114473	85.6517	-0.420401	0.156048	26.084	0.215034	NA	66.4452	-0.801069	0.0525306	23.8618	0.427534	NA	62.1106	-1.02533	0.0112736	17.522	-0.159584	NA
CRAT_NM_000755	CRAT	NM_000755	ENSG00000095321	67.5992	-0.241641	NA	37.0392	0.106874	NA	48.5836	-0.828299	0.0671373	29.9135	0.0227192	NA	44.5589	-1.15674	0.0112926	26.5601	-0.222397	NA
SLC25A29_NM_001039355	SLC25A29	NM_001039355	ENSG00000197119	63.6155	-0.404126	NA	31.3537	0.0550278	NA	46.078	-1.02704	0.0319735	26.4106	0.0634947	NA	44.056	-1.20175	0.0113035	22.4528	-0.301154	NA
MRPL40_NM_003776	MRPL40	NM_003776	ENSG00000185608	66.6334	-0.525936	NA	37.9066	-0.271943	NA	51.7177	-0.942471	0.0391627	32.1673	-0.309977	NA	49.2045	-1.11396	0.0113035	31.9509	-0.287174	0.586915
MAP3K8_NM_001244134	MAP3K8	NM_001244134	ENSG00000107968	55.3404	-0.317019	NA	49.3421	-0.189471	NA	44.8323	-0.527834	0.246463	42.3008	-0.177071	0.675877	36.5038	-1.24259	0.0113132	37.4693	-0.500492	0.309331
NCAPD2_NM_014865	NCAPD2	NM_014865	ENSG00000010292	58.1891	-0.419867	NA	51.9712	-0.255502	NA	45.1262	-0.805365	0.0864417	39.1892	-0.611895	0.179487	40.4297	-1.21602	0.0113132	39.6973	-0.591286	0.25267
LOC100288152_NR_125375	LOC100288152	NR_125375	ENSG00000225138	71.3326	-0.238381	0.402287	58.5293	-0.0817156	NA	53.1186	-0.691273	0.119676	38.7279	-0.758695	0.0918604	46.7853	-1.1452	0.011332	38.727	-0.750337	0.128884
ADAT3_NM_138422	ADAT3	NM_138422	ENSG00000213638	100.311	-0.342104	0.214302	61.0509	-0.0203601	NA	78.1665	-0.689146	0.0828057	47.1941	-0.233157	0.567598	70.7738	-1.00961	0.011337	43.4357	-0.452653	0.330422
HAAO_NM_012205	HAAO	NM_012205	ENSG00000162882	78.781	-0.270403	0.337331	84.3297	-0.473894	0.154844	52.6653	-1.15109	0.0117655	65.6634	-0.781954	0.0470244	52.8585	-1.13266	0.011337	57.418	-1.3199	0.00126648
CACNB3_NM_001206916	CACNB3	NM_001206916	ENSG00000167535	67.0926	-0.443152	NA	32.3231	0.0675481	NA	50.5286	-0.9333	0.0391955	24.8127	-0.119717	NA	47.9219	-1.12601	0.011403	23.4877	-0.234669	NA
DBP_NM_001352	DBP	NM_001352	ENSG00000105516	62.339	-0.399697	NA	54.6434	-0.316567	NA	47.4814	-0.832356	0.0689203	42.3176	-0.590969	0.171068	42.4604	-1.22617	0.0114788	44.2283	-0.44194	0.343219
ANP32B_NM_006401	ANP32B	NM_006401	ENSG00000136938	59.3817	-0.450913	NA	96.7435	-0.23538	0.400596	47.4212	-0.755644	0.100965	71.1033	-0.671105	0.0744631	42.1923	-1.17641	0.0114788	62.2324	-1.15851	0.00388504
PANK1_NM_148977	PANK1	NM_148977	ENSG00000152782	60.24	-0.455396	NA	85.4573	-0.446069	0.173657	47.3655	-0.814511	0.082467	66.1524	-0.768225	0.0519446	42.7336	-1.21425	0.0115103	59.2116	-1.19075	0.00348878
HIPK3_NM_001278162	HIPK3	NM_001278162	ENSG00000110422	131.464	-0.269375	0.281054	108.789	-0.272509	0.344461	91.2138	-1.03257	0.00639846	92.5561	-0.273206	0.434578	94.0501	-0.883237	0.0115186	81.1005	-0.65367	0.0864199
FABP6_NM_001040442	FABP6	NM_001040442	ENSG00000170231	58.6055	-0.409871	NA	44.957	-0.0383944	NA	45.0754	-0.825049	0.0787725	34.0027	-0.317514	NA	40.4302	-1.20923	0.011531	30.6141	-0.579725	0.272449
BLM_NM_000057	BLM	NM_000057	ENSG00000197299	54.7576	-0.437389	NA	65.994	-0.240679	NA	44.9006	-0.628996	0.172567	52.9432	-0.404189	0.310097	38.3178	-1.21198	0.011531	50.3114	-0.538883	0.227736
ZMAT3_NM_022470	ZMAT3	NM_022470	ENSG00000172667	48.1107	-0.442058	NA	35.7682	-0.0893715	NA	36.5586	-0.930911	0.0589776	29.7129	-0.16388	NA	33.582	-1.27154	0.0115348	29.3868	-0.182006	0.744818
SLC43A3_NM_001278201	SLC43A3	NM_001278201	ENSG00000134802	55.0389	-0.510134	NA	103.113	-0.463223	0.147707	44.9681	-0.746208	0.107134	75.214	-1.00528	0.0098772	38.6574	-1.27641	0.0116035	66.9469	-1.502	0.000205664
LOC105274304_NR_130916	LOC105274304	NR_130916	ENSG00000261335	52.3861	-0.815213	NA	39.9112	-0.391119	NA	40.6081	-1.34136	0.00535709	31.6921	-0.625942	NA	42.2629	-1.17846	0.0116035	32.493	-0.550109	0.296727
FOXP1_NM_001244808	FOXP1	NM_001244808	ENSG00000114861	76.4071	-0.121182	0.65541	148.171	-0.140973	0.55243	59.9165	-0.400001	0.342754	100.738	-0.843039	0.0244542	48.4249	-1.1117	0.0116035	99.9084	-0.864205	0.011213
KPNA6_NM_012316	KPNA6	NM_012316	ENSG00000025800	39.9485	-0.261304	NA	45.3037	-0.476846	NA	31.7268	-0.533863	0.288331	39.6638	-0.414741	0.347367	24.9508	-1.42472	0.0116388	37.5946	-0.551973	0.281227
VAMP8_NM_003761	VAMP8	NM_003761	ENSG00000118640	55.1116	-0.541385	NA	133.374	-0.568227	0.0906944	46.9193	-0.643962	0.160614	103.735	-0.895379	0.0150833	40.0303	-1.20963	0.0116717	88.7053	-1.59688	4.81771e-06
NUDT7_NM_001105663	NUDT7	NM_001105663	ENSG00000140876	39.2856	-0.849146	NA	123.163	-0.143295	0.589973	35.4806	-0.877964	0.0872128	94.9898	-0.345027	0.498262	31.6336	-1.34881	0.0117134	97.6989	-0.33685	0.386779
NTSR1_NM_002531	NTSR1	NM_002531	ENSG00000101188	65.3081	-0.510211	NA	72.4014	-0.345028	NA	50.7745	-0.881632	0.0553317	48.852	-1.10601	0.0129256	47.9116	-1.11778	0.0117379	46.1253	-1.33107	0.00506779
STAG2_NM_001042750	STAG2	NM_001042750	ENSG00000101972	84.2879	-0.455397	0.142579	72.5255	-0.332016	NA	66.9641	-0.750762	0.0731979	58.1123	-0.523078	0.201524	61.8411	-1.04334	0.0117482	50.582	-1.00798	0.0271296
ALG1_NM_019109	ALG1	NM_019109	ENSG00000033011	58.2878	-0.622855	NA	50.0408	-0.521923	NA	46.7848	-0.951354	0.039593	38.5887	-0.89385	NA	44.3855	-1.15465	0.0117575	41.8384	-0.633103	0.175988
SREK1_NM_001077199	SREK1	NM_001077199	ENSG00000153914	55.6125	-0.417184	NA	85.7528	-0.343783	0.265078	41.0026	-0.957226	0.049688	74.064	-0.316126	0.3837	38.583	-1.22933	0.0117575	62.1588	-0.880929	0.0419852
C10orf11_NM_001305581	C10orf11	NM_001305581	ENSG00000148655	65.4639	-0.497274	NA	83.0506	-0.409927	0.210369	54.8256	-0.665463	0.137064	63.1148	-0.806324	0.0443967	48.0026	-1.15152	0.011786	65.5339	-0.670025	0.0994785
WBP2_NM_012478	WBP2	NM_012478	ENSG00000132471	46.4966	-0.403087	NA	23.4792	0.118938	NA	36.6647	-0.709519	0.149877	20.7206	0.231635	NA	30.9284	-1.33843	0.0118382	18.6375	0.0276223	NA
UBE3A_NM_000462	UBE3A	NM_000462	ENSG00000114062	59.0274	-0.400992	NA	48.2558	-0.361886	NA	43.547	-0.964738	0.0453601	42.2598	-0.31288	0.460339	41.167	-1.18628	0.0118414	36.0114	-0.797749	0.110446
JADE1_NM_001287441	JADE1	NM_001287441	ENSG00000077684	50.866	-0.481631	NA	46.8346	-0.239382	NA	37.9938	-1.01062	0.039593	38.1796	-0.383793	NA	35.8889	-1.2437	0.0118414	35.464	-0.602947	0.235024
CLK1_NM_004071	CLK1	NM_004071	ENSG00000013441	46.7381	-0.429185	NA	85.1051	-0.17204	0.533725	41.3652	-0.411067	0.374937	65.2949	-0.450596	0.231192	31.6459	-1.31707	0.0118618	63.1087	-0.545106	0.176805
ZNF655_NM_001083956	ZNF655	NM_001083956	ENSG00000197343	69.5744	-0.420801	0.178507	87.2903	-0.319563	0.297525	53.8867	-0.806338	0.0694699	69.4397	-0.525975	0.167416	49.0614	-1.13656	0.0119092	60.29	-1.00815	0.0128444
TMEM38A_NM_024074	TMEM38A	NM_024074	ENSG00000072954	54.4676	-0.620859	NA	45.768	-0.471932	NA	44.3656	-0.874967	0.0613428	39.3783	-0.469124	0.2874	39.9593	-1.24585	0.0119154	37.9048	-0.602373	0.213507
LOC100506844_NR_038269	LOC100506844	NR_038269	ENSG00000257698	64.1658	-0.498696	NA	136.602	-0.632734	0.0762746	53.5515	-0.421421	0.505742	107.925	-0.924438	0.0139519	46.2488	-1.21483	0.0119283	92.3287	-1.64479	6.48109e-06
NOD2_NM_022162	NOD2	NM_022162	ENSG00000167207	59.3969	-0.415996	NA	58.0303	-0.521108	NA	48.7081	-0.607945	0.173538	43.0372	-0.991111	0.0291092	41.6283	-1.17115	0.0119444	45.4056	-0.832267	0.0668266
NQO1_NM_001286137	NQO1	NM_001286137	ENSG00000181019	63.9645	-0.462829	NA	45.1863	0.0408919	NA	52.6216	-0.649549	0.138173	32.9776	-0.317441	NA	45.8219	-1.13401	0.0119444	30.512	-0.522263	0.317945
SUN2_NM_001199579	SUN2	NM_001199579	ENSG00000100242	76.8576	-0.464868	0.142991	63.393	-0.0843875	NA	60.8045	-0.783311	0.0676674	43.8676	-0.643641	0.130095	56.1741	-1.05618	0.0119444	42.8969	-0.698967	0.13424
HIST1H4I_NM_003495	HIST1H4I	NM_003495	ENSG00000276180	134.553	-0.507949	0.188147	120.15	-0.507202	0.126527	108.256	-0.859417	0.152424	89.8123	-0.972485	0.00963791	94.2084	-1.53949	0.0119444	90.6173	-0.931691	0.0103147
CSTF3-AS1_NR_034027	CSTF3-AS1	NR_034027	ENSG00000247151	65.2054	-0.345023	NA	65.8252	-0.160676	NA	52.4655	-0.589664	0.203693	48.8561	-0.528928	0.211822	44.087	-1.22893	0.0119607	43.8075	-0.880625	0.0665409
PHLDA1_NM_007350	PHLDA1	NM_007350	ENSG00000139289	75.9936	-0.398885	0.190329	46.6512	0.0337302	NA	54.949	-1.046	0.017638	33.2188	-0.359836	NA	54.2486	-1.07249	0.0120154	33.2017	-0.387511	0.455345
PLA2G6_NM_001199562	PLA2G6	NM_001199562	ENSG00000184381	41.6275	-0.23115	NA	86.9583	-0.73127	0.055684	29.5093	-0.824496	0.114075	65.0713	-1.26353	0.00164573	25.6173	-1.40291	0.0120154	56.9179	-2.02159	1.01256e-06
DARS-AS1_NR_110199	DARS-AS1	NR_110199	ENSG00000231890	58.957	-0.384315	NA	94.6982	-0.370002	0.226515	44.8555	-0.814453	0.0787725	70.1669	-0.826068	0.0327481	40.7266	-1.17907	0.0120862	65.6772	-1.07569	0.00606237
TTC14_NM_001042601	TTC14	NM_001042601	ENSG00000163728	59.2852	-0.416957	NA	38.0827	-0.315489	NA	41.9768	-1.17528	0.0139278	30.0326	-0.558148	NA	41.5632	-1.22574	0.0121071	30.9488	-0.487499	0.354671
FOXP1_NM_001012505	FOXP1	NM_001012505	ENSG00000114861	78.9343	-0.177156	0.514894	127.299	-0.103763	0.665938	63.5652	-0.389195	0.346399	88.8511	-0.698035	0.0577441	51.511	-1.0875	0.0121173	84.1845	-0.881089	0.0147173
KLF7_NM_001270942	KLF7	NM_001270942	ENSG00000118263	45.9689	-0.418727	NA	71.8824	-0.492536	NA	31.7659	-1.21582	0.0207249	52.8676	-1.00458	0.0174255	31.0922	-1.32422	0.0121823	52.6387	-1.0316	0.0153553
RFWD3_NM_018124	RFWD3	NM_018124	ENSG00000168411	50.679	-0.408863	NA	48.3614	-0.0941922	NA	41.9931	-0.576441	0.222745	40.3234	-0.12843	0.761055	34.7808	-1.25838	0.0121894	34.1823	-0.575117	0.251238
SMG6_NM_001256827	SMG6	NM_001256827	ENSG00000070366	79.3714	-0.320221	0.279142	148.115	-0.214278	0.412229	56.7226	-0.97388	0.0317512	96.5694	-1.09892	0.00199628	54.6979	-1.1061	0.01223	85.7935	-1.66385	2.08504e-06
PPP1R12C_NM_001271618	PPP1R12C	NM_001271618	ENSG00000125503	64.5795	-0.380648	NA	41.0602	-0.222943	NA	50.1486	-0.738714	0.118576	35.827	-0.166177	NA	44.1512	-1.21439	0.0122474	36.5244	-0.0993928	0.851904
PPP1R3G_NM_001145115	PPP1R3G	NM_001145115	ENSG00000219607	49.656	-0.597569	NA	44.4651	-0.360863	NA	39.6304	-0.904651	0.0669189	31.1158	-0.984418	NA	35.8583	-1.28536	0.0122517	29.8138	-1.16928	0.0281138
DDX21_NM_001256910	DDX21	NM_001256910	ENSG00000165732	57.7333	-0.591645	NA	45.5918	-0.318419	NA	47.4328	-0.833385	0.0738342	33.0049	-0.850704	NA	43.1656	-1.17689	0.0122863	32.2393	-0.922233	0.0783953
PJA2_NM_014819	PJA2	NM_014819	ENSG00000198961	56.2939	-0.459098	NA	87.8665	-0.212401	0.469691	46.8863	-0.626594	0.193657	74.0844	-0.255183	0.505292	39.7111	-1.23731	0.0122863	77.3003	-0.111966	0.790398
UPP1_NM_001287429	UPP1	NM_001287429	ENSG00000183696	62.6192	-0.384386	NA	39.957	-0.196478	NA	49.2193	-0.704716	0.116114	28.4605	-0.69564	NA	43.515	-1.14849	0.0122863	28.3497	-0.70397	0.191369
OAF_NM_178507	OAF	NM_178507	ENSG00000184232	58.747	-0.460148	NA	61.8075	-0.281891	NA	41.8502	-1.18299	0.0133665	42.4925	-0.952046	0.0326034	42.0388	-1.16081	0.0122864	44.6614	-0.771562	0.0918406
SNHG8_NR_003584	SNHG8	NR_003584	ENSG00000269893	41.381	-0.390085	NA	73.7515	-0.408383	NA	30.9097	-0.892433	0.0833992	56.9843	-0.730462	0.0831159	27.5752	-1.34938	0.0122878	55.738	-0.803879	0.061527
TBCK_NM_001163435	TBCK	NM_001163435	ENSG00000145348	50.7795	-0.622699	NA	39.7977	-0.100947	NA	39.9926	-1.0231	0.0363287	31.1776	-0.301583	NA	38.1936	-1.21558	0.0122902	27.4154	-0.624117	0.255551
ALDH3B1_NM_000694	ALDH3B1	NM_000694	ENSG00000006534	72.8871	-0.525861	0.114708	81.2821	-0.266931	0.375131	55.6069	-0.998935	0.0226658	65.4125	-0.428852	0.259642	54.5546	-1.05809	0.01233	53.9239	-1.07184	0.0115232
SYK_NM_001174168	SYK	NM_001174168	ENSG00000165025	106.538	-0.200632	0.442961	125.653	-0.195285	0.456466	82.5443	-0.52767	0.171261	105.034	-0.232312	0.47828	72.6159	-0.955358	0.0123532	89.8205	-0.718088	0.0721734
AKAP10_NM_007202	AKAP10	NM_007202	ENSG00000108599	72.2688	-0.542755	0.107485	85.9157	-0.491153	0.15145	59.4893	-0.743734	0.0813537	69.5307	-0.665223	0.0845411	54.2482	-1.0595	0.0124215	66.2575	-0.82174	0.0429165
XRCC6BP1_NM_033276	XRCC6BP1	NM_033276	ENSG00000166896	43.5374	-0.449468	NA	46.2411	-0.139541	NA	37.4429	-0.514851	0.28345	37.3667	-0.279053	NA	30.0751	-1.32399	0.0124369	39.7277	-0.0921502	0.854321
PDSS2_NM_020381	PDSS2	NM_020381	ENSG00000164494	60.1118	-0.311324	NA	40.3614	0.00203093	NA	42.4695	-0.959719	0.049688	28.5857	-0.456559	NA	40.5625	-1.17362	0.0124455	28.0043	-0.503472	0.351285
COQ5_NM_032314	COQ5	NM_032314	ENSG00000110871	56.5141	-0.459666	NA	39.0147	-0.211521	NA	47.7256	-0.575964	0.216073	29.68	-0.524894	NA	40.2341	-1.18554	0.0124755	29.8037	-0.524702	0.322285
FAM118A_NM_017911	FAM118A	NM_017911	ENSG00000100376	48.7203	-0.397815	NA	33.2945	-0.335601	NA	39.6194	-0.632757	0.183451	31.2562	-0.139182	NA	33.3567	-1.25985	0.0124885	27.5545	-0.461233	0.393337
NUMA1_NM_001286561	NUMA1	NM_001286561	ENSG00000137497	44.6896	-0.639348	NA	32.9376	0.306024	NA	38.8391	-0.692127	0.15074	23	-0.0295147	NA	33.1721	-1.27244	0.012561	23.0461	-0.0018168	NA
SLC1A4_NM_001193493	SLC1A4	NM_001193493	ENSG00000115902	45.3212	-0.495158	NA	94.6808	-0.326365	0.287696	32.9452	-1.15075	0.0252896	74.6355	-0.560973	0.127894	31.9525	-1.29033	0.0125764	68.4012	-0.85036	0.029525
IRF2BP2_NM_001077397	IRF2BP2	NM_001077397	ENSG00000168264	94.5619	-0.266226	0.318357	244.52	-0.257742	0.280845	66.6051	-0.950805	0.0222656	167.062	-0.996896	0.00176908	65.5525	-0.997552	0.012577	150.488	-1.45963	2.32563e-07
SCNN1A_NM_001038	SCNN1A	NM_001038	ENSG00000111319	49.1575	-0.661329	NA	36.2848	-0.361509	NA	39.6891	-0.914539	0.0734356	28.995	-0.556715	NA	37.0472	-1.22356	0.0126552	30.748	-0.39956	0.448026
RAD50_NM_005732	RAD50	NM_005732	ENSG00000113522	45.355	-0.290026	NA	72.017	-0.350326	NA	32.1628	-0.906044	0.0774563	58.4428	-0.506992	0.198071	29.2053	-1.31618	0.0126853	51.6112	-0.928235	0.0340783
KLHL42_NM_020782	KLHL42	NM_020782	ENSG00000087448	53.3147	-0.614233	NA	57.359	-0.415909	NA	44.0696	-0.8196	0.0782662	40.9869	-0.982658	0.0334206	40.0381	-1.19647	0.0127135	37.5943	-1.40004	0.00388448
IKZF1_NM_001291837	IKZF1	NM_001291837	ENSG00000185811	111.738	-0.0174401	0.945958	123.819	-0.283106	0.32267	83.6793	-0.415845	0.27761	92.7837	-0.679695	0.0729133	70.3125	-0.980975	0.0128278	88.3022	-0.837608	0.0254664
HERC1_NM_003922	HERC1	NM_003922	ENSG00000103657	64.349	-0.598857	NA	39.8967	0.0557143	NA	51.1941	-0.943484	0.036989	30.9016	-0.138735	NA	48.8769	-1.10006	0.0128474	27.8711	-0.364908	0.502841
FDXACB1_NM_138378	FDXACB1	NM_138378	ENSG00000255561	46.4042	-0.668506	NA	58.1528	-0.499826	NA	38.4779	-0.889597	0.0681566	41.5819	-1.13624	0.0129786	35.171	-1.242	0.0128527	40.0916	-1.27767	0.00787505
PCBD1_NM_001289797	PCBD1	NM_001289797	ENSG00000166228	45.2754	-0.536351	NA	38.5277	-0.463575	NA	33.3317	-1.15211	0.0251087	30.0605	-0.76148	NA	32.578	-1.27437	0.0129183	34.3267	-0.376889	0.451876
MYBBP1A_NM_001105538	MYBBP1A	NM_001105538	ENSG00000132382	61.4881	-0.692532	NA	47.6184	-0.250563	NA	53.7012	-0.707706	0.107924	37.1842	-0.483836	NA	47.9034	-1.1114	0.0129183	35.0391	-0.670288	0.177718
NDUFAF3_NM_199074	NDUFAF3	NM_199074	ENSG00000178057	111.416	-0.254191	0.325528	114.725	-0.264386	0.339365	81.3757	-0.803344	0.0488878	79.0973	-0.96637	0.0109449	77.1709	-0.959738	0.0129193	76.1729	-1.07289	0.00575198
SCAMP4_NM_079834	SCAMP4	NM_079834	ENSG00000227500	100.311	-0.342104	0.214302	61.0509	-0.0203601	NA	78.4943	-0.675121	0.0892293	47.1941	-0.233157	0.567598	71.0307	-0.993792	0.0129486	43.4357	-0.452653	0.330422
RNASEH2B_NM_001142279	RNASEH2B	NM_001142279	ENSG00000136104	99.7491	-0.367071	0.303054	179.127	-0.279531	0.287696	76.3201	-0.950354	0.0293047	133.928	-0.692403	0.0480728	74.2119	-1.04902	0.0129516	119.128	-1.1439	0.000448819
C11orf1_NM_022761	C11orf1	NM_022761	ENSG00000137720	55.1066	-0.442088	NA	51.6206	-0.648253	NA	39.4371	-1.12498	0.0209847	39.8409	-1.05366	0.024921	37.5916	-1.27846	0.0129743	38.5675	-1.21684	0.0123879
SCD_NM_005063	SCD	NM_005063	ENSG00000099194	55.5505	-0.780789	NA	74.2256	-0.286871	NA	47.2859	-0.89938	0.0510529	52.4392	-0.866416	0.0380725	43.5162	-1.18975	0.0129815	50.4534	-0.995224	0.023933
STYXL1_NM_016086	STYXL1	NM_016086	ENSG00000127952	55.9509	-0.324186	NA	33.4242	-0.123743	NA	39.4057	-1.02564	0.0351318	24.4416	-0.464902	NA	37.1303	-1.2381	0.0129815	28.9535	-0.0492986	0.932843
UBE2V2_NM_003350	UBE2V2	NM_003350	ENSG00000169139	75.8583	-0.319651	0.272044	37.0018	-0.11008	NA	58.5847	-0.688042	0.110216	34.4315	0.0925156	NA	52.4845	-1.07531	0.012985	31.9571	-0.0465336	0.934183
C9orf66_NM_152569	C9orf66	NM_152569	ENSG00000183784	150.728	0.000346319	0.998768	186.236	-0.0970436	0.659973	120.271	-0.214164	0.565729	151.136	-0.217806	0.482735	96.2862	-0.915992	0.0129981	121.535	-0.918801	0.00369606
LEKR1_NM_001004316	LEKR1	NM_001004316	ENSG00000197980	52.5784	-0.578807	NA	53.8955	-0.309085	NA	46.3	-0.578694	0.217417	35.4768	-1.16319	NA	38.974	-1.18856	0.0130138	40.5725	-0.680962	0.157056
LACC1_NM_153218	LACC1	NM_153218	ENSG00000179630	74.1516	-0.467453	0.140877	30.094	-0.155612	NA	57.6396	-0.850514	0.0543384	25.4521	-0.17057	NA	54.0024	-1.06485	0.0130595	23.2356	-0.376781	NA
CCDC137_NM_199287	CCDC137	NM_199287	ENSG00000185298	65.4568	-0.507288	NA	47.0373	-0.414917	NA	51.5545	-0.848341	0.0637528	37.6207	-0.601166	NA	47.3602	-1.15095	0.0130729	34.9472	-0.864696	0.0818653
NCF2_NM_000433	NCF2	NM_000433	ENSG00000116701	56.1581	-0.744473	NA	48.4925	-0.505363	NA	45.9392	-1.01034	0.0300131	38.2974	-0.777091	NA	44.5504	-1.13379	0.0130733	37.0487	-0.941105	0.0575977
ATF4_NM_001675	ATF4	NM_001675	ENSG00000128272	59.2261	-0.372659	NA	57.5452	-0.388067	NA	48.051	-0.592874	0.189691	47.2207	-0.515301	0.213889	40.8897	-1.16876	0.0130733	43.7162	-0.738394	0.113083
AGPAT3_NM_020132	AGPAT3	NM_020132	ENSG00000160216	37.6154	-0.761539	NA	48.2258	-0.252515	NA	30.5258	-1.06502	0.0432228	36.3087	-0.608673	NA	29.0822	-1.31038	0.0132013	31.0693	-1.14845	0.0255227
ZBED5-AS1_NR_034137	ZBED5-AS1	NR_034137	ENSG00000247271	93.0962	-0.513996	0.107656	95.8929	-0.112569	0.665014	82.3474	-0.467335	0.230443	74.4283	-0.352808	0.32362	70.9135	-0.966008	0.0132097	67.1354	-0.660189	0.0943702
C17orf75_NM_022344	C17orf75	NM_022344	ENSG00000108666	82.3284	-0.557147	0.0992919	85.7367	-0.557806	0.110421	65.8566	-0.856926	0.0403206	62.6623	-1.13185	0.0052899	61.9789	-1.0449	0.0132343	60.4867	-1.2643	0.00177109
HENMT1_NM_144584	HENMT1	NM_144584	ENSG00000162639	78.3621	-0.333112	0.257291	90.9231	-0.495684	0.138458	58.9618	-0.799894	0.0687552	67.0387	-1.01969	0.0104972	54.5653	-1.07662	0.0132347	60.7949	-1.45911	0.000266127
CAMK2D_NM_001221	CAMK2D	NM_001221	ENSG00000145349	68.1783	-0.65255	NA	67.3441	-0.779269	NA	57.7357	-0.774832	0.0716166	56.0072	-0.921263	0.0274347	53.3443	-1.05884	0.0132386	55.5982	-0.956471	0.025056
USP40_NM_018218	USP40	NM_018218	ENSG00000085982	63.367	-0.629804	NA	21.389	-0.0880105	NA	49.6651	-1.02031	0.0251525	18.1272	-0.12314	NA	48.6897	-1.10921	0.0132491	13.4922	-0.867457	NA
PLEKHG4_NM_001129729	PLEKHG4	NM_001129729	ENSG00000196155	55.0174	-0.491652	NA	49.8673	-0.0587301	NA	40.4897	-1.08546	0.0239	35.1811	-0.545733	NA	39.2108	-1.19503	0.0132745	33.968	-0.620175	0.230258
BCLAF1_NM_001077440	BCLAF1	NM_001077440	ENSG00000029363	70.0173	-0.313793	0.289797	58.596	-0.308666	NA	52.6732	-0.77103	0.0860688	40.8968	-0.905571	0.0470244	47.7872	-1.13519	0.0132834	41.5422	-0.882717	0.0583629
NQO1_NM_000903	NQO1	NM_000903	ENSG00000181019	65.6613	-0.445003	NA	43.6938	0.0417072	NA	55.7001	-0.532801	0.213382	32.6092	-0.255354	NA	47.1545	-1.10225	0.0133246	29.73	-0.50084	0.341035
C9orf43_NM_001278629	C9orf43	NM_001278629	ENSG00000157653	68.1098	-0.554175	NA	61.9009	-0.497551	NA	54.2219	-0.858064	0.0583378	46.8528	-0.920339	0.0387256	51.4998	-1.06774	0.0133246	42.5253	-1.3315	0.00520178
INPP5B_NM_005540	INPP5B	NM_005540	ENSG00000204084	46.576	-0.843603	NA	46.27	-0.462716	NA	39.83	-0.982582	0.0419095	37.5864	-0.622165	NA	37.8862	-1.20244	0.0133917	37.0179	-0.703877	0.157238
BTF3L4_NM_001136497	BTF3L4	NM_001136497	ENSG00000134717	62.8757	-0.151067	NA	70.8809	-0.350296	NA	44.3606	-0.753153	0.109488	50.3476	-0.948463	0.0272791	39.5365	-1.18515	0.0133928	50.6938	-0.911158	0.0358318
LOC100507634_NR_038320	LOC100507634	NR_038320	N/A	70.5428	-0.326469	0.266795	61.5359	-0.454333	NA	57.1671	-0.538547	0.204944	51.2599	-0.554969	0.176465	48.5898	-1.09173	0.0134184	50.0111	-0.619425	0.159864
DIS3L2_NM_001257281	DIS3L2	NM_001257281	ENSG00000144535	62.7896	-0.437967	NA	51.3961	-0.401331	NA	50.2643	-0.725293	0.105112	40.6682	-0.672708	0.126734	44.9909	-1.12052	0.0134246	35.9539	-1.08087	0.0315489
RAD51C_NM_002876	RAD51C	NM_002876	ENSG00000108384	55.6515	-0.532824	NA	36.2124	-0.111403	NA	42.4963	-1.02836	0.0306782	28.6748	-0.297633	NA	40.789	-1.16974	0.0134602	27.3267	-0.419831	0.437036
GALNT7_NM_017423	GALNT7	NM_017423	ENSG00000109586	61.7451	-0.584534	NA	50.5926	-0.271844	NA	44.1087	-1.35508	0.00423862	38.8845	-0.588424	0.18219	46.651	-1.12057	0.0134602	35.1271	-0.914583	0.0653634
CAMTA2_NM_001171166	CAMTA2	NM_001171166	ENSG00000108509	49.399	-0.31321	NA	57.5922	-0.264555	NA	36.5561	-0.813132	0.107949	45.3153	-0.497044	0.240158	32.4749	-1.29592	0.0134994	38.8818	-1.01539	0.0352779
MID1IP1-AS1_NR_046706	MID1IP1-AS1	NR_046706	ENSG00000238123	48.0894	-0.369667	NA	61.2811	-0.339331	NA	39.7891	-0.540011	0.249397	48.535	-0.564259	0.173062	32.0252	-1.2885	0.0134994	37.5749	-1.57457	0.00108092
SCO2_NM_001169110	SCO2	NM_001169110	ENSG00000284194	70.1181	-0.500084	0.131329	45.7131	-0.367249	NA	56.693	-0.747833	0.0833992	36.6089	-0.577284	NA	51.8182	-1.06416	0.0135168	32.4461	-0.969186	0.0608444
PCM1_NM_006197	PCM1	NM_006197	ENSG00000078674	67.5671	-0.65995	NA	137.053	-0.306743	0.261162	56.0727	-0.863577	0.0508268	103.409	-0.682522	0.0444591	52.9759	-1.07554	0.0135193	97.9506	-0.861378	0.010865
USP8_NM_001128610	USP8	NM_001128610	ENSG00000138592	65.1787	-0.507209	NA	36.6383	0.0172044	NA	51.8992	-0.829157	0.0687552	28.74	-0.162652	NA	48.0151	-1.11239	0.0135195	31.7112	0.0919761	0.865293
WIPF2_NM_133264	WIPF2	NM_133264	ENSG00000171475	54.6647	-0.42288	NA	26.5584	-0.287076	NA	46.6552	-0.514379	0.261956	24.0319	-0.191279	NA	38.3676	-1.20936	0.0135293	21.6737	-0.438001	NA
SLC43A3_NM_014096	SLC43A3	NM_014096	ENSG00000134802	55.3076	-0.588989	NA	111.13	-0.520906	0.111734	44.9858	-0.857529	0.0648775	81.9035	-1.03696	0.00664201	40.4415	-1.22486	0.0135389	73.1321	-1.53866	7.52238e-05
KCNC3_NR_110912	KCNC3	NR_110912	ENSG00000131398	70.4527	-0.217633	0.445776	90.0576	-0.411485	0.194842	54.4485	-0.555267	0.200761	65.5562	-0.933155	0.0200555	46.2938	-1.10881	0.0136369	65.2852	-0.932262	0.0211955
SLC22A20_NM_001004326	SLC22A20	NM_001004326	ENSG00000197847	77.1734	-0.252405	0.369551	101.282	-0.613559	0.0843085	57.3826	-0.736494	0.0922274	73.9911	-1.20682	0.00178689	51.2256	-1.11387	0.0136635	71.5522	-1.35948	0.000291491
ZNF786_NM_152411	ZNF786	NM_152411	ENSG00000197362	75.0014	-0.376608	0.206998	28.3334	0.4969	NA	54.4263	-0.981869	0.0259273	21.0987	0.379268	NA	53.2622	-1.05607	0.0136635	23.2814	0.617988	NA
SUV420H1_NM_001300908	SUV420H1	NM_001300908	ENSG00000110066	82.4804	-0.482831	0.135432	63.5	-0.421844	NA	70.0647	-0.563145	0.161737	47.5011	-0.868151	0.0453212	61.5775	-0.996877	0.0136671	52.7536	-0.517837	0.239231
SPATA13-AS1_NR_046531	SPATA13-AS1	NR_046531	ENSG00000227213	54.1507	-0.316826	NA	35.2723	-0.158653	NA	38.6079	-0.9592	0.0480987	27.6344	-0.378649	NA	35.982	-1.22313	0.0136671	25.6774	-0.584175	NA
DNAJC7_NM_003315	DNAJC7	NM_003315	ENSG00000168259	63.0772	-0.45208	NA	85.959	-0.294373	0.339515	50.8024	-0.693752	0.124032	71.8253	-0.345902	0.341664	44.1827	-1.17933	0.0136671	58.0218	-1.0367	0.0136854
GGCX_NM_001311312	GGCX	NM_001311312	ENSG00000115486	60.6259	-0.142457	NA	21.9114	-0.235172	NA	52.3981	-0.151123	0.744838	24.2075	0.264408	NA	37.7526	-1.2072	0.0137531	22.6284	0.185913	NA
GGCX_NM_000821	GGCX	NM_000821	ENSG00000115486	60.8405	-0.133744	NA	21.6946	-0.254472	NA	52.7259	-0.135064	0.770489	24.2075	0.264408	NA	37.7526	-1.2072	0.0137531	22.6284	0.185913	NA
SELK_NM_021237	SELK	NM_021237	ENSG00000113811	42.1652	-0.311319	NA	29.0178	-0.371687	NA	31.9402	-0.731501	0.14774	22.0375	-0.720639	NA	27.0127	-1.34741	0.0137531	21.597	-0.852532	NA
KIF2A_NM_001098511	KIF2A	NM_001098511	ENSG00000068796	60.9832	-0.57067	NA	35.1112	-0.147786	NA	45.3554	-1.16936	0.013652	26.4938	-0.459328	NA	45.7475	-1.13607	0.0137531	22.4653	-0.962361	NA
MINOS1-NBL1_NM_001204088	MINOS1-NBL1	NM_001204088	ENSG00000270136	38.9816	-0.58296	NA	57.0189	-0.29798	NA	32.0567	-0.82484	0.103219	44.1009	-0.589515	0.163884	27.3718	-1.38935	0.0137853	42.8593	-0.662206	0.157483
LOC100287042_NR_036520	LOC100287042	NR_036520	ENSG00000263843	64.5883	-0.474623	NA	59.2454	-0.358675	NA	49.8656	-0.885564	0.0558884	46.4892	-0.592292	0.168815	46.752	-1.12802	0.0137853	42.2244	-0.942267	0.0434424
FARSA_NM_004461	FARSA	NM_004461	ENSG00000179115	94.0306	-0.31351	0.25517	79.1345	-0.23695	0.415636	69.5375	-0.83227	0.0431016	60.4662	-0.547528	0.156362	66.5579	-0.978735	0.0137853	55.6921	-0.807952	0.0547766
GPN1_NM_007266	GPN1	NM_007266	ENSG00000198522	66.2523	-0.41624	NA	41.5992	0.00696241	NA	54.1015	-0.627183	0.161213	31.4798	-0.247019	NA	46.8786	-1.11257	0.0137853	34.2316	-0.017861	0.974034
TBCK_NM_001163436	TBCK	NM_001163436	ENSG00000145348	49.8815	-0.600873	NA	49.0846	-0.174575	NA	40.4686	-0.880301	0.069526	38.0765	-0.423703	NA	37.1295	-1.20385	0.0137853	36.5098	-0.539962	0.279707
ASPSCR1_NM_001251888	ASPSCR1	NM_001251888	ENSG00000169696	63.8874	-0.258154	NA	34.9314	-0.394169	NA	49.4329	-0.605823	0.173664	29.0187	-0.500572	NA	42.255	-1.14784	0.0137854	26.7027	-0.773737	NA
MIR4496_NR_039717	MIR4496	NR_039717	ENSG00000284388	67.4799	-0.595991	NA	54.2982	-0.682407	NA	53.1901	-1.0036	0.0297611	45.7426	-0.793094	0.0791169	51.5112	-1.11335	0.0138041	40.8339	-1.24495	0.0123234
NDUFAF3_NM_199073	NDUFAF3	NM_199073	ENSG00000178057	111.054	-0.387248	0.160524	78.9412	-0.323144	0.297767	79.268	-1.08603	0.00603695	55.4714	-0.957	0.0230295	80.1137	-0.977142	0.013843	52.7842	-1.13665	0.00779917
COMMD10_NM_001308080	COMMD10	NM_001308080	ENSG00000145781	53.5503	-0.381383	NA	43.5646	-0.505706	NA	39.6274	-0.926479	0.0567981	32.3329	-1.01942	NA	36.8834	-1.19659	0.0138516	33.5939	-0.921205	0.0805688
SGSM2_NM_014853	SGSM2	NM_014853	ENSG00000141258	70.4674	-0.256369	0.399751	41.8015	-0.112148	NA	49.4794	-0.91795	0.0452946	29.8939	-0.572743	NA	47.0834	-1.10393	0.013897	29.7363	-0.594879	0.256978
SGSM2_NM_001098509	SGSM2	NM_001098509	ENSG00000141258	70.4674	-0.256369	0.399751	41.8015	-0.112148	NA	49.4794	-0.91795	0.0452946	29.8939	-0.572743	NA	47.0834	-1.10393	0.013897	29.7363	-0.594879	0.256978
LILRA2_NM_001290271	LILRA2	NM_001290271	ENSG00000239998	56.07	-0.506287	NA	117.68	-0.721333	0.046908	47.7647	-0.607839	0.181175	87.2004	-1.28787	0.000395425	40.8504	-1.15397	0.0138995	83.4801	-1.49753	2.22184e-05
COPS7A_NM_001164093	COPS7A	NM_001164093	ENSG00000111652	53.9732	-0.554387	NA	48.6365	-0.680007	NA	46.1334	-0.647205	0.158987	41.2943	-0.746266	0.0889369	39.8556	-1.1751	0.0139157	44.6702	-0.511393	0.28421
KLF13_NM_001302461	KLF13	NM_001302461	N/A	65.5121	-0.409174	NA	56.3573	-0.321835	NA	49.954	-0.851092	0.0609934	41.3393	-0.781648	0.0749255	46.2687	-1.14746	0.0139432	44.1541	-0.581422	0.215515
ZMYM2_NM_003453	ZMYM2	NM_003453	ENSG00000121741	59.2618	-0.463922	NA	37.3907	-0.326512	NA	47.5684	-0.733723	0.106519	28.9765	-0.633365	NA	42.6337	-1.13653	0.013989	26.362	-0.958553	NA
PARTICL_NR_038942	PARTICL	NR_038942	N/A	80.64	-0.452944	0.142579	181.12	-0.63175	0.0472032	61.5184	-0.891382	0.0370994	135.433	-1.1299	0.000807762	59.4549	-1.00758	0.013989	123.342	-1.56079	2.88691e-07
SNORA71E_NR_002972	SNORA71E	NR_002972	ENSG00000274309	55.6705	-0.432639	NA	26.4659	0.131757	NA	44.6502	-0.70329	0.126894	18.7093	-0.188022	NA	39.2412	-1.17022	0.013989	19.9743	-0.0438551	NA
WDR27_NM_001202550	WDR27	NM_001202550	ENSG00000184465	75.244	-0.302402	0.297391	60.7919	-0.346392	NA	58.1227	-0.657502	0.124665	45.1427	-0.774732	0.0711522	51.5522	-1.06816	0.013989	50.3397	-0.428901	0.330326
ALKBH5_NM_017758	ALKBH5	NM_017758	ENSG00000091542	61.9744	-0.285316	NA	43.4393	0.07077	NA	46.1561	-0.73189	0.122679	30.9817	-0.332734	NA	41.3614	-1.15951	0.0140403	29.0811	-0.485719	0.359793
MEMO1_NM_001137602	MEMO1	NM_001137602	ENSG00000162959	65.8591	-0.721224	NA	29.3363	-0.189799	NA	56.0107	-0.857896	0.0604877	22.504	-0.471954	NA	52.9766	-1.05616	0.014041	21.0995	-0.665884	NA
CD74_NM_001025158	CD74	NM_001025158	ENSG00000019582	51.3246	-0.108001	NA	38.8534	-0.240662	NA	38.5392	-0.481283	0.310359	30.2107	-0.496703	NA	30.3438	-1.3022	0.0140461	25.1652	-1.05087	NA
C18orf8_NM_001276342	C18orf8	NM_001276342	ENSG00000141452	62.3049	-0.344817	NA	42.5005	-0.240055	NA	49.6795	-0.614637	0.171563	42.9403	0.146207	0.727815	42.7469	-1.14581	0.0140487	36.0101	-0.242647	0.631873
FLJ27354_NR_033981	FLJ27354	NR_033981	ENSG00000231999	132.233	-0.407022	0.137496	67.9712	-0.353589	NA	103.887	-0.735505	0.0456775	54.4218	-0.554135	0.175764	100.037	-0.843004	0.0140772	49.9625	-0.826169	0.0636062
ATE1_NM_001001976	ATE1	NM_001001976	ENSG00000107669	71.227	-0.268103	0.349223	55.5421	-0.328165	NA	53.6205	-0.697734	0.110996	46.0585	-0.44008	0.286927	48.1582	-1.08512	0.0140772	43.3051	-0.626656	0.181117
USP43_NM_001267576	USP43	NM_001267576	ENSG00000154914	58.4479	-0.622037	NA	39.9615	-0.184329	NA	47.6967	-0.874424	0.0555679	26.4057	-0.904683	NA	44.5105	-1.12262	0.0140772	29.0195	-0.607416	0.256076
HIRA_NM_003325	HIRA	NM_003325	ENSG00000100084	71.2666	-0.552933	0.106641	58.2816	-0.302491	NA	57.673	-0.824296	0.0612781	40.7477	-0.950252	0.0363779	53.7777	-1.05418	0.014089	43.3352	-0.717349	0.123358
PPIH_NM_006347	PPIH	NM_006347	ENSG00000171960	38.9428	-0.305886	NA	36.234	-0.167489	NA	31.0424	-0.578702	0.258351	28.4906	-0.37388	NA	25.0026	-1.36952	0.0141082	32.8636	-0.0100923	0.985731
MIR4457_NR_039662	MIR4457	NR_039662	ENSG00000263670	55.1955	-0.437902	NA	38.7324	-0.396856	NA	41.3739	-0.944243	0.0508268	32.6206	-0.455717	NA	39.1793	-1.16955	0.0141205	30.0072	-0.724393	0.171588
ADAM8_NM_001109	ADAM8	NM_001109	ENSG00000151651	47.9528	-0.807265	NA	59.0406	-0.5386	NA	40.8193	-0.948709	0.048075	42.5884	-1.14578	0.0129256	38.2369	-1.19247	0.0141245	44.4493	-0.986304	0.0340613
ATN1_NM_001940	ATN1	NM_001940	ENSG00000111676	42.7289	-0.305413	NA	59.9081	-0.0853165	NA	31.9347	-0.779009	0.129885	45.1469	-0.383727	0.369814	27.0951	-1.36714	0.0141245	39.9942	-0.607038	0.367602
IP6K1_NM_001242829	IP6K1	NM_001242829	ENSG00000176095	42.0716	-0.476506	NA	29.1975	-0.0460434	NA	31.5154	-1.00161	0.0513463	24.9135	-0.0356704	NA	29.4712	-1.30187	0.0141245	26.1214	0.0821223	NA
PSMG3-AS1_NR_021487	PSMG3-AS1	NR_021487	ENSG00000230487	61.1411	-0.322278	NA	51.9459	-0.229234	NA	47.3886	-0.670224	0.141657	39.4172	-0.546578	0.211228	41.558	-1.14541	0.0141245	38.2476	-0.656498	0.179231
SLC20A2_NM_001257181	SLC20A2	NM_001257181	ENSG00000168575	114.335	-0.191407	0.443602	63.3312	-0.439953	NA	80.2238	-0.871146	0.0269485	52.2694	-0.565891	0.175958	78.6011	-0.927166	0.0141245	51.6562	-0.603379	0.186252
IARS_NM_002161	IARS	NM_002161	ENSG00000196305	63.4651	-0.31254	NA	31.2819	-0.175544	NA	43.9971	-1.07456	0.0240202	26.47	-0.215105	NA	43.3714	-1.12453	0.0141245	22.4242	-0.668087	NA
EMG1_NM_006331	EMG1	NM_006331	ENSG00000126749	58.0889	-0.464917	NA	79.1067	-0.28935	0.341345	45.8842	-0.792114	0.0854261	57.5529	-0.762457	0.0601434	41.751	-1.1536	0.0141317	52.2931	-1.12101	0.00892958
HNRNPK_NM_031263	HNRNPK	NM_031263	ENSG00000165119	73.985	-0.328518	0.257848	113.568	-0.358362	0.221252	56.0925	-0.760492	0.0795478	80.0102	-1.0042	0.00839082	51.6137	-1.05544	0.0141379	76.5909	-1.16713	0.00148827
DHCR24_NM_014762	DHCR24	NM_014762	ENSG00000116133	55.8439	-0.281168	NA	60.7251	0.122706	NA	42.0913	-0.72441	0.122355	39.7747	-0.489718	0.27311	37.0764	-1.20486	0.014172	41.2912	-0.392767	0.411667
MIR4258_NR_036212	MIR4258	NR_036212	ENSG00000264349	54.7392	-0.489488	NA	48.2646	-0.0255859	NA	46.6784	-0.576888	0.20332	35.803	-0.370713	NA	39.4753	-1.17941	0.0141746	28.8126	-1.08338	0.0453681
IPO8_NM_006390	IPO8	NM_006390	ENSG00000133704	50.5926	-0.49125	NA	41.8392	-0.15215	NA	34.5545	-1.44061	0.00450309	27.5132	-0.867039	NA	36.1414	-1.25917	0.0141959	29.0835	-0.729529	0.169275
N4BP2L1_NM_001079691	N4BP2L1	NM_001079691	ENSG00000139597	67.8716	-0.316714	NA	62.8921	-0.468718	NA	47.6457	-1.01984	0.0265731	47.3126	-0.915704	0.0351084	46.6107	-1.09695	0.0142337	42.3121	-1.11371	0.0858457
SLC3A2_NR_037193	SLC3A2	NR_037193	ENSG00000168003	67.9969	-0.342513	NA	52.9588	-0.465995	NA	48.7336	-0.970802	0.0360248	45.6114	-0.476054	0.264294	46.9579	-1.11152	0.0143414	40.9479	-0.841053	0.0904818
ZCCHC7_NM_001289119	ZCCHC7	NM_001289119	ENSG00000147905	50.0077	-0.379227	NA	46.8571	-0.210822	NA	37.4319	-0.894644	0.0712285	41.9991	-0.119307	0.77827	34.2903	-1.22298	0.0143414	32.3001	-0.893078	0.0905873
C5orf56_NR_045116	C5orf56	NR_045116	ENSG00000197536	68.5169	-0.359137	NA	108.254	-0.537766	0.106435	52.025	-0.785449	0.0766254	84.6601	-0.843631	0.0255921	47.942	-1.09182	0.0143615	76.5644	-1.25028	0.000763106
DAP_NM_001291963	DAP	NM_001291963	ENSG00000112977	86.9902	-0.650802	0.0651979	45.2132	-0.104694	NA	68.9587	-1.01016	0.0150318	34.5912	-0.378975	NA	68.4496	-1.02579	0.014363	32.4511	-0.524432	0.318363
PARP8_NM_001178056	PARP8	NM_001178056	ENSG00000151883	159.866	-0.328094	0.205892	150.804	-0.277581	0.292054	125.5	-0.641282	0.0909541	120.408	-0.470027	0.143592	118.45	-0.817316	0.014363	102.384	-1.01212	0.0029329
TBC1D24_NM_001199107	TBC1D24	NM_001199107	ENSG00000162065	60.2225	-0.423376	NA	22.374	-0.178523	NA	42.8635	-1.12215	0.0208835	19.3131	-0.170903	NA	40.9833	-1.25101	0.0143975	16.9169	-0.499129	NA
MBNL1-AS1_NR_027037	MBNL1-AS1	NR_027037	ENSG00000229619	180.337	-0.0401523	0.856896	195.129	-0.228201	0.345196	138.76	-0.373105	0.273592	132.485	-0.975421	0.00253045	120.836	-0.809744	0.0143975	133.736	-0.922403	0.00266421
IRF1_NM_002198	IRF1	NM_002198	ENSG00000125347	54.7881	-0.520469	NA	64.0629	-0.155708	NA	45.5461	-0.671856	0.152818	43.1469	-0.829976	0.0615034	38.7496	-1.24089	0.0144204	44.9439	-0.705685	0.127112
P4HB_NM_000918	P4HB	NM_000918	ENSG00000185624	47.2566	-0.438326	NA	58.1367	-0.24665	NA	39.734	-0.565321	0.230979	43.2157	-0.613243	0.166704	32.6093	-1.252	0.0144667	44.8626	-0.510044	0.274283
DPH5_NM_001077394	DPH5	NM_001077394	ENSG00000117543	44.104	-0.242049	NA	29.2998	-0.131787	NA	30.7674	-0.915679	0.0803842	19.5869	-0.741726	NA	27.7908	-1.33442	0.014471	21.199	-0.553502	NA
SATB2_NM_001172509	SATB2	NM_001172509	ENSG00000119042	55.3391	-0.518629	NA	59.4754	-0.402283	NA	43.6295	-0.876833	0.0669978	50.3092	-0.441879	0.273448	40.337	-1.1809	0.014471	43.2694	-0.922858	0.0451385
LEKR1_NM_001193283	LEKR1	NM_001193283	ENSG00000197980	51.7856	-0.571978	NA	53.4541	-0.251086	NA	45.5992	-0.569619	0.230695	33.9772	-1.2041	NA	38.3904	-1.17182	0.0145448	40.2862	-0.595171	0.219174
MVB12A_NM_138401	MVB12A	NM_138401	ENSG00000141971	75.8979	-0.36424	0.22936	48.2313	-0.214297	NA	65.3835	-0.402068	0.340519	35.6215	-0.59722	NA	53.2953	-1.08064	0.0145534	35.4298	-0.6029	0.231076
IGF2BP2_NM_001291872	IGF2BP2	NM_001291872	ENSG00000073792	95.8554	-0.222385	0.429089	91.4783	-0.133341	0.641691	85.07	-0.160179	0.695824	74.1638	-0.211213	0.686157	64.6403	-1.04048	0.0145996	60.4437	-0.913016	0.0434755
HPCAL1_NM_002149	HPCAL1	NM_002149	ENSG00000115756	54.505	-0.373339	NA	59.8441	-0.210688	NA	35.1368	-1.47842	0.00339378	40.7371	-0.85187	0.069067	37.3249	-1.19156	0.0146362	42.1331	-0.76433	0.11684
ELAC1_NM_018696	ELAC1	NM_018696	ENSG00000141642	45.2193	-0.447807	NA	52.0018	-0.184995	NA	36.7582	-0.708769	0.151719	41.1965	-0.390008	0.363253	31.441	-1.27983	0.0146558	41.6907	-0.332296	0.47934
ATF4_NM_182810	ATF4	NM_182810	ENSG00000128272	58.486	-0.370655	NA	57.5452	-0.388067	NA	47.1468	-0.611856	0.18035	47.2207	-0.515301	0.213889	40.5211	-1.15152	0.0146893	43.7162	-0.738394	0.113083
TCP11L1_NM_001145541	TCP11L1	NM_001145541	ENSG00000176148	65.797	-0.274723	NA	35.5412	0.231733	NA	46.2457	-0.941136	0.0452854	28.3852	0.18487	NA	43.3309	-1.16709	0.0147075	23.9498	-0.19435	NA
SCAF1_NM_021228	SCAF1	NM_021228	ENSG00000126461	74.9874	-0.538532	0.107485	50.4996	-0.110194	NA	54.0546	-1.23985	0.00528566	43.2608	-0.0889712	0.83098	56.6779	-1.02255	0.0147204	37.5005	-0.465678	0.34181
ETV1_NR_120445	ETV1	NR_120445	ENSG00000006468	49.4628	0.0277287	NA	34.0853	-0.0997591	NA	34.5606	-0.522158	0.284043	24.1801	-0.563745	NA	26.5723	-1.40697	0.0147204	27.6619	-0.213512	0.69992
USP11_NM_004651	USP11	NM_004651	ENSG00000102226	41.289	-0.596608	NA	27.0124	-0.438681	NA	36.6749	-0.6031	0.221416	24.387	-0.349325	NA	30.374	-1.29979	0.0147216	19.5664	-1.05594	NA
LOC101929767_NR_110868	LOC101929767	NR_110868	N/A	63.2112	-0.474745	NA	29.5288	-0.323693	NA	52.4723	-0.654873	0.14783	26.9069	-0.200206	NA	46.2934	-1.09264	0.0147365	23.7918	-0.47218	NA
PROCA1_NM_001304952	PROCA1	NM_001304952	ENSG00000167525	52.0581	-0.61644	NA	36.5994	-0.245399	NA	43.7539	-0.768115	0.100695	32.7892	-0.14847	NA	39.1995	-1.16968	0.0147946	26.0128	-0.752925	NA
DCAF8_NR_028103	DCAF8	NR_028103	ENSG00000132716	65.5656	-0.289945	NA	57.654	-0.521839	NA	50.3467	-0.4456	0.480454	52.8603	-0.34005	0.386824	44.2311	-1.15468	0.0148625	44.6681	-0.84796	0.0636647
C9orf43_NM_152786	C9orf43	NM_152786	ENSG00000157653	66.0169	-0.529644	NA	61.7791	-0.519591	NA	52.0737	-0.866385	0.0567786	47.0823	-0.928356	0.0374379	49.5629	-1.06468	0.0148905	42.7525	-1.33999	0.00492253
C9orf43_NM_001278630	C9orf43	NM_001278630	ENSG00000157653	66.0169	-0.529644	NA	61.7791	-0.519591	NA	52.0737	-0.866385	0.0567786	47.0823	-0.928356	0.0374379	49.5629	-1.06468	0.0148905	42.7525	-1.33999	0.00492253
CNOT8_NM_001301073	CNOT8	NM_001301073	ENSG00000155508	63.8539	-0.440604	NA	75.9438	-0.257978	0.385659	48.7749	-0.87558	0.0532815	58.858	-0.534384	0.170527	45.9952	-1.09806	0.0149161	51.8091	-0.955867	0.0264446
TRIM8_NM_030912	TRIM8	NM_030912	ENSG00000171206	91.8856	-0.249131	0.361967	114.413	-0.292767	0.304287	69.2015	-0.675458	0.0984089	82.0456	-0.842501	0.0244542	63.3493	-0.985112	0.0149631	75.9136	-1.13119	0.00279649
ARHGEF2_NM_004723	ARHGEF2	NM_004723	ENSG00000116584	78.8792	-0.288237	0.306087	131.939	-0.319683	0.261254	56.8802	-0.875585	0.0444511	97.5431	-0.764995	0.0298362	54.4127	-1.02851	0.0149971	89.0636	-1.08275	0.00265711
CEACAM21_NM_001288773	CEACAM21	NM_001288773	ENSG00000007129	92.7344	-0.218097	0.442961	55.1156	-0.0301296	NA	68.0704	-0.740038	0.091258	45.8427	-0.070695	0.868781	62.2945	-1.05125	0.0150219	37.0445	-0.642885	0.209478
CACYBP_NM_014412	CACYBP	NM_014412	ENSG00000116161	77.1973	-0.722756	0.0581549	46.8724	-0.118835	NA	66.3925	-0.798521	0.0561677	35.3213	-0.424828	NA	62.9089	-0.97972	0.0150255	37.4241	-0.247687	0.615457
PGBD2_NM_001017434	PGBD2	NM_001017434	ENSG00000185220	54.8932	-0.620073	NA	23.3103	-0.24575	NA	44.0345	-0.940997	0.0451668	19.7868	-0.287438	NA	41.2103	-1.16206	0.0150321	18.8493	-0.355098	NA
ZNF561-AS1_NR_122038	ZNF561-AS1	NR_122038	ENSG00000267106	87.4272	-0.363845	0.203485	110.152	-0.500135	0.130235	65.0924	-0.8686	0.0378885	84.7478	-0.857261	0.0229298	63.0431	-0.973019	0.0150321	73.8661	-1.43076	0.000147841
ZFYVE27_NM_001002262	ZFYVE27	NM_001002262	ENSG00000155256	62.5473	-0.564061	NA	40.8435	0.0780407	NA	47.5355	-1.06618	0.0220749	29.0524	-0.31566	NA	46.6023	-1.10775	0.0150597	26.5221	-0.520467	NA
MAP3K6_NM_001297609	MAP3K6	NM_001297609	ENSG00000142733	58.9608	-0.633283	NA	40.6769	-0.181071	NA	49.1955	-0.802449	0.0766254	35.1334	-0.149595	NA	45.1661	-1.10739	0.0150766	33.1282	-0.270147	0.603969
NAA25_NM_024953	NAA25	NM_024953	ENSG00000111300	65.381	-0.458829	NA	61.1522	-0.41054	NA	52.461	-0.720606	0.108036	50.1577	-0.571484	0.162311	47.5333	-1.08837	0.0150766	47.7287	-0.694826	0.132873
HOOK3_NM_032410	HOOK3	NM_032410	ENSG00000168172	88.9695	-0.323334	0.248434	86.1532	-0.299118	0.314848	62.1967	-1.06391	0.0162546	68.72	-0.496802	0.180252	62.9012	-0.988583	0.0150766	62.687	-0.792267	0.0488194
PROSC_NM_007198	PROSC	NM_007198	ENSG00000147471	69.7438	-0.40051	0.191696	67.6921	-0.310924	NA	55.3468	-0.703404	0.106933	54.5287	-0.47393	0.231544	49.9022	-1.06021	0.0150967	55.5455	-0.403574	0.341594
LINC01354_NR_038426	LINC01354	NR_038426	ENSG00000231768	50.4224	-0.471221	NA	46.9872	0.0394222	NA	33.4936	-1.47601	0.00395781	32.7257	-0.414211	NA	35.7973	-1.19568	0.0151361	27.7667	-0.912101	0.0921366
MRPL49_NR_037567	MRPL49	NR_037567	ENSG00000149792	62.6877	-0.44877	NA	32.9121	-0.163489	NA	47.8187	-0.889921	0.0544546	28.5354	-0.113802	NA	45.3507	-1.09689	0.0151606	25.0629	-0.439994	NA
LOC100130950_NR_034082	LOC100130950	NR_034082	ENSG00000261879	58.3831	-0.249933	NA	33.1822	-0.472466	NA	46.09	-0.523919	0.245353	32.3274	-0.188238	NA	38.3593	-1.16236	0.0152015	26.2902	-0.773071	NA
GOPC_NM_001017408	GOPC	NM_001017408	ENSG00000047932	38.4032	-0.624769	NA	31.5165	-0.19108	NA	29.0179	-1.19082	NA	23.0843	-0.630086	NA	28.4262	-1.30603	0.0152854	25.6159	-0.335059	NA
CD101_NM_001256106	CD101	NM_001256106	ENSG00000134256	41.1264	-0.386421	NA	61.8793	-0.253292	NA	31.4782	-0.810842	0.119124	47.7079	-0.542953	0.195774	27.2797	-1.34765	0.015335	40.4379	-0.903097	0.168376
ZMYM2_NM_001190964	ZMYM2	NM_001190964	ENSG00000121741	57.6034	-0.462075	NA	37.8794	-0.324891	NA	47.0216	-0.675945	0.136603	30.1598	-0.557063	NA	41.4246	-1.131	0.0153484	27.0008	-0.905415	NA
MRPL49_NM_004927	MRPL49	NM_004927	ENSG00000149792	60.5547	-0.453733	NA	33.7324	-0.139555	NA	46.2055	-0.893176	0.0561677	29.3987	-0.0757326	NA	43.7414	-1.10951	0.0154179	25.4957	-0.423751	NA
ATP8B4_NM_024837	ATP8B4	NM_024837	ENSG00000104043	63.2779	-0.295975	NA	54.1717	-0.315727	NA	47.8495	-0.737591	0.109383	37.5264	-0.974452	NA	42.246	-1.16248	0.0154201	37.3508	-1.00618	0.0481599
ZNF565_NM_152477	ZNF565	NM_152477	ENSG00000196357	78.0151	-0.318851	0.266795	39.2466	-0.0277159	NA	62.9608	-0.544245	0.191923	32.279	-0.0979245	NA	54.6376	-1.02217	0.0154201	41.3526	0.486247	0.310798
ADSSL1_NM_152328	ADSSL1	NM_152328	ENSG00000185100	41.2455	-0.54884	NA	29.9678	0.165239	NA	34.9729	-0.695505	0.162776	21.4454	-0.110387	NA	29.4623	-1.31323	0.0154479	20.579	-0.19112	NA
GPATCH8_NM_001002909	GPATCH8	NM_001002909	ENSG00000186566	59.3069	-0.481131	NA	44.8136	-0.287176	NA	48.4064	-0.723805	0.115965	39.9723	-0.198354	0.653769	43.28	-1.12281	0.0154479	38.1745	-0.28085	0.573638
BBC3_NM_014417	BBC3	NM_014417	ENSG00000105327	81.1327	-0.476631	0.132648	47.5779	-0.370574	NA	65.233	-0.737625	0.0766254	42.7569	-0.239627	0.568634	60.2457	-0.998314	0.0154479	41.8686	-0.297852	0.533164
RUNX1_NM_001754	RUNX1	NM_001754	ENSG00000159216	69.3742	-0.216057	0.466417	130.084	-0.15713	0.534402	54.9033	-0.484381	0.300679	91.614	-0.731354	0.0444672	45.309	-1.14836	0.0154865	79.0116	-1.32194	0.000367755
WDR74_NM_001307977	WDR74	NM_001307977	ENSG00000133316	67.247	-0.68518	NA	53.5855	-0.366767	NA	56.7405	-0.842983	0.0685044	39.8993	-0.775557	0.092157	52.6082	-1.11435	0.0154922	41.3382	-0.681385	0.157483
LINC00667_NR_015389	LINC00667	NR_015389	ENSG00000263753	58.0425	-0.320156	NA	43.5282	-0.00928172	NA	44.5446	-0.705786	0.139327	27.4086	-0.814842	NA	39.435	-1.15116	0.0155155	32.346	-0.330495	0.526441
GPR85_NM_001146267	GPR85	NM_001146267	ENSG00000164604	58.3586	-0.617568	NA	38.3544	-0.861483	NA	47.9643	-0.863363	0.0750126	34.7452	-0.781797	NA	44.6943	-1.13023	0.0155232	31.5375	-1.16699	0.0296227
PAN3_NM_175854	PAN3	NM_175854	ENSG00000152520	126.29	-0.383577	0.165793	85.8416	-0.207404	0.457426	98.0849	-0.745867	0.0509103	62.705	-0.668946	0.0840879	94.0721	-0.875516	0.0155532	58.0229	-0.93729	0.0226611
HMGB1_NM_002128	HMGB1	NM_002128	ENSG00000189403	83.264	-0.423977	0.156048	44.6545	-0.268913	NA	62.4625	-0.932341	0.0273604	40.2578	-0.147302	0.737805	61.2678	-0.995602	0.015571	34.3226	-0.58627	0.272963
ZNF335_NM_022095	ZNF335	NM_022095	ENSG00000198026	57.1558	-0.21166	NA	64.4934	-0.298058	NA	42.9423	-0.626153	0.176233	53.8429	-0.375983	0.343451	36.883	-1.17586	0.0156429	49.7197	-0.612954	0.178302
DHX35_NM_001190809	DHX35	NM_001190809	ENSG00000101452	40.0868	-0.296576	NA	36.8519	-0.285138	NA	31.0679	-0.642379	0.208198	33.1408	-0.186631	NA	25.761	-1.3386	0.0156558	27.2726	-0.722839	0.180086
SLC16A5_NM_001271765	SLC16A5	NM_001271765	ENSG00000170190	52.8917	-0.43497	NA	59.8709	-0.354306	NA	39.9333	-0.921275	0.0558884	47.587	-0.566755	0.173062	37.3037	-1.17404	0.0157084	41.571	-1.0347	0.026874
UPP1_NM_003364	UPP1	NM_003364	ENSG00000183696	59.9169	-0.391187	NA	41.4095	-0.195544	NA	46.3935	-0.758924	0.0982959	29.1718	-0.725811	NA	42.0293	-1.12146	0.0157084	30.1176	-0.619081	0.243151
ZCCHC7_NM_001289120	ZCCHC7	NM_001289120	ENSG00000147905	47.7765	-0.359345	NA	49.9708	-0.157967	NA	35.876	-0.854241	0.0892267	44.0866	-0.0943519	0.821783	32.4147	-1.23146	0.0157192	33.4146	-0.914206	0.0778332
KIF22_NM_001256269	KIF22	NM_001256269	ENSG00000079616	65.3666	-0.396859	NA	50.1856	-0.0744871	NA	52.5032	-0.666433	0.129597	42.8153	-0.0500618	0.905593	46.5096	-1.08284	0.0158265	37.2948	-0.389782	0.425603
SLFN12L_NM_001195790	SLFN12L	NM_001195790	ENSG00000205045	72.0575	-0.303158	0.301753	76.4308	-0.411299	0.211183	58.7092	-0.504616	0.24027	63.6038	-0.500465	0.211869	49.462	-1.08281	0.0158265	52.4621	-1.17837	0.00596109
PDCD4-AS1_NR_026932	PDCD4-AS1	NR_026932	N/A	63.965	-0.338491	NA	47.1752	-0.377859	NA	48.1152	-0.79718	0.0800484	33.4694	-0.957292	NA	43.5172	-1.14428	0.0158328	38.4942	-0.525571	0.276877
LINC00900_NR_034148	LINC00900	NR_034148	ENSG00000246100	52.4453	-0.603355	NA	50.5611	-0.429297	NA	36.811	-1.4709	0.00322592	38.9948	-0.757583	0.0890368	39.7125	-1.14397	0.0158377	33.6861	-1.31286	0.00913356
ZNF644_NM_032186	ZNF644	NM_032186	ENSG00000122482	46.381	-0.486643	NA	49.2044	-0.408386	NA	37.5643	-0.773721	0.134905	37.4212	-0.745804	NA	33.0392	-1.26961	0.0158425	35.7031	-0.945903	0.0551917
AKT1S1_NM_001278159	AKT1S1	NM_001278159	ENSG00000204673	85.5985	-0.286793	0.300796	61.8681	-0.00821237	NA	64.6049	-0.719878	0.0833992	47.7811	-0.217998	0.589383	59.7124	-0.9867	0.0158542	43.358	-0.456776	0.337273
RAB27A_NM_183235	RAB27A	NM_183235	ENSG00000069974	94.3954	-0.354418	0.22891	151.18	-0.440666	0.13943	66.8482	-1.0669	0.0161788	113.5	-0.886417	0.0117442	67.5631	-1.0068	0.0158663	100.798	-1.38824	3.67813e-05
LOC101929210_NR_125922	LOC101929210	NR_125922	ENSG00000246541	44.3554	-0.496669	NA	10.9124	-0.241177	NA	36.2967	-0.743502	0.137235	12.0722	0.10222	NA	31.7581	-1.23629	0.0158727	11.3271	0.00153594	NA
SRSF7_NM_001031684	SRSF7	NM_001031684	ENSG00000115875	54.6806	-0.534606	NA	82.0913	-0.244886	0.413834	45.8054	-0.686121	0.133218	56.194	-0.926639	0.0251549	40.3078	-1.13808	0.0159034	56.6184	-0.884464	0.0349398
UBXN11_NM_001077262	UBXN11	NM_001077262	ENSG00000158062	60.1082	-0.329295	NA	95.8821	-0.603567	0.0924988	41.2969	-1.10844	0.0251504	66.6388	-1.4151	0.000318552	40.4824	-1.18678	0.0159107	66.1416	-1.43418	0.000251663
CNOT8_NM_001301082	CNOT8	NM_001301082	ENSG00000155508	63.5885	-0.432741	NA	75.7339	-0.251984	0.394614	48.5459	-0.866833	0.0558884	58.6807	-0.527937	0.175052	45.7698	-1.08889	0.015921	51.271	-0.973887	0.0244667
FDFT1_NM_001287748	FDFT1	NM_001287748	ENSG00000079459	120.594	-0.570704	0.0717789	100.691	-0.312125	0.297767	91.4307	-1.07721	0.00447242	73.5604	-0.799258	0.0388079	78.5736	-1.49957	0.015921	66.452	-1.17598	0.00415558
WDR74_NM_018093	WDR74	NM_018093	ENSG00000133316	60.7004	-0.416529	NA	73.3812	-0.546559	NA	49.5786	-0.631745	0.175204	56.1046	-0.955432	0.0283392	42.716	-1.16772	0.0159675	57.6884	-0.846603	0.0576939
DCAF8_NM_015726	DCAF8	NM_015726	ENSG00000132716	65.562	-0.273876	NA	56.7386	-0.526398	NA	50.487	-0.419888	0.506339	51.9177	-0.35265	0.374531	44.0468	-1.14595	0.0159929	44.5249	-0.807527	0.0784808
MRPL51_NM_016497	MRPL51	NM_016497	ENSG00000111639	62.8144	-0.552629	NA	41.2277	-0.223292	NA	52.6374	-0.711631	0.119426	34.5584	-0.271398	NA	46.9473	-1.13525	0.0159929	32.4949	-0.445451	0.388271
MPG_NM_001015054	MPG	NM_001015054	ENSG00000103152	61.0871	-0.815044	NA	110.618	-0.846524	0.0389056	51.5887	-0.983768	0.0278326	78.6908	-1.68998	5.94231e-06	50.1899	-1.06168	0.0160871	72.5624	-2.22493	3.52069e-09
DYRK1A_NM_101395	DYRK1A	NM_101395	ENSG00000157540	71.2337	-0.138967	0.632602	70.7224	0.0149202	NA	58.1551	-0.292515	0.494281	57.1727	-0.0895476	0.826881	45.2783	-1.10319	0.0161103	49.1926	-0.45775	0.332767
RNF187_NM_001010858	RNF187	NM_001010858	ENSG00000168159	62.7598	-0.563397	NA	34.1007	-0.0849555	NA	51.049	-0.799288	0.0828057	24.3457	-0.514352	NA	47.5218	-1.08365	0.0161199	22.1371	-0.76644	NA
TUBB6_NM_001303525	TUBB6	NM_001303525	ENSG00000176014	51.4135	-0.460122	NA	46.6128	-0.18173	NA	38.0155	-1.01581	0.0378885	35.233	-0.487982	NA	36.6067	-1.17222	0.0161339	32.142	-0.779593	0.129411
RPL19_NM_000981	RPL19	NM_000981	ENSG00000108298	56.3507	-0.425221	NA	94.1017	-0.483605	0.146005	46.8398	-0.585086	0.216179	73.0055	-0.805465	0.0360529	39.4564	-1.19979	0.016142	70.0831	-0.945681	0.0142623
KIAA2013_NM_138346	KIAA2013	NM_138346	ENSG00000116685	47.0901	-0.569665	NA	24.3927	0.0573956	NA	39.7773	-0.718801	0.131335	19.3378	-0.0734752	NA	34.6805	-1.20398	0.0161766	21.8287	0.21122	NA
DGKZ_NM_001105540	DGKZ	NM_001105540	ENSG00000149091	62.4969	-0.456928	NA	81.7305	-0.348383	0.289953	51.3286	-0.659797	0.142033	58.4591	-0.90565	0.0291092	45.2385	-1.09686	0.0161766	55.793	-1.10637	0.00806844
TESC_NM_001168325	TESC	NM_001168325	ENSG00000088992	37.9561	-0.592079	NA	55.8934	-0.13078	NA	30.8579	-0.864423	0.0922274	39.965	-0.575242	0.20176	27.7096	-1.29347	0.0161766	36.7695	-0.856007	0.0856281
NDUFA10_NM_004544	NDUFA10	NM_004544	ENSG00000130414	43.7849	-0.403643	NA	22.6842	-0.370347	NA	40.2828	-0.278428	0.548842	19.2993	-0.476998	NA	30.0246	-1.26798	0.0162348	18.2958	-0.629541	NA
RFX5_NM_000449	RFX5	NM_000449	ENSG00000143390	46.8253	-0.44558	NA	58.4147	-0.273624	NA	38.0399	-0.692483	0.153848	42.2362	-0.772721	0.0828083	32.9367	-1.22255	0.0162723	40.5854	-0.929757	0.0556094
GCN1_NM_006836	GCN1	NM_006836	ENSG00000089154	66.1521	-0.452855	NA	46.9365	-0.15322	NA	56.4228	-0.528063	0.217454	36.3182	-0.398435	NA	48.0577	-1.06763	0.0163076	31.9039	-0.795638	0.120303
HARBI1_NM_173811	HARBI1	NM_173811	ENSG00000180423	74.4436	-0.571047	0.100375	33.4767	-0.493973	NA	59.3268	-0.888595	0.039593	29.5286	-0.467872	NA	57.3435	-1.00631	0.0163648	27.2454	-0.72922	0.185836
FUT8_NR_038170	FUT8	NR_038170	ENSG00000033170	51.8848	-0.377319	NA	25.7706	-0.220921	NA	39.9615	-0.764859	0.119458	21.9464	-0.256155	NA	35.5175	-1.21508	0.0163723	21.5291	-0.289031	NA
CEP170_NM_001042404	CEP170	NM_001042404	ENSG00000143702	59.2978	-0.506917	NA	96.8606	-0.255813	0.379204	46.6923	-0.867482	0.0608984	81.1032	-0.320042	0.392182	43.8433	-1.09741	0.0164223	74.5098	-0.568291	0.180409
PTPRE_NM_130435	PTPRE	NM_130435	ENSG00000132334	39.3365	-0.515467	NA	58.7299	-0.271712	NA	29.9479	-1.00089	0.0562878	43.8113	-0.667227	0.121694	27.5763	-1.31861	0.0164239	44.4668	-0.619094	0.180086
CWC25_NM_017748	CWC25	NM_017748	ENSG00000273559	61.0921	-0.291434	NA	40.828	-0.182968	NA	51.5928	-0.379131	0.380488	32.7911	-0.332692	NA	41.0464	-1.13689	0.0164239	36.8807	-0.044786	0.934944
THADA_NM_001271644	THADA	NM_001271644	ENSG00000115970	44.2658	-0.622624	NA	43.1785	-0.390567	NA	36.0176	-0.905688	0.0666168	36.5176	-0.447706	NA	33.3252	-1.22156	0.0164239	33.1178	-0.740906	0.145782
TOPORS-AS1_NR_033992	TOPORS-AS1	NR_033992	N/A	55.7851	-0.0929752	NA	53.2876	-0.350199	NA	40.4823	-0.58885	0.215869	44.0638	-0.460141	0.290461	34.0026	-1.21575	0.0164531	40.3658	-0.746213	0.137488
GTF2IRD1P1_NR_003934	GTF2IRD1P1	NR_003934	ENSG00000230583	67.3997	-0.42865	NA	40.6335	-0.444568	NA	48.5896	-1.0886	0.0174955	33.7807	-0.584197	NA	48.8451	-1.05979	0.0164675	33.0633	-0.658164	0.196712
DOCK10_NM_001290263	DOCK10	NM_001290263	ENSG00000135905	47.7924	-0.211826	NA	55.6228	-0.293559	NA	38.1114	-0.44859	0.348413	42.3367	-0.635411	0.164591	30.1796	-1.25018	0.0164927	32.8854	-1.67178	0.0014589
NREP_NM_004772	NREP	NM_004772	ENSG00000134986	100.091	-0.209334	0.425775	53.6405	-0.24384	NA	73.0937	-0.745614	0.0670908	44.1017	-0.350541	0.418926	68.6072	-0.963241	0.0165097	39.4361	-0.685351	0.175223
MLLT10_NM_001195627	MLLT10	NM_001195627	ENSG00000078403	64.9696	-0.269263	NA	25.6923	0.0364892	NA	51.8039	-0.512285	0.24122	17.9371	-0.380696	NA	43.8022	-1.09609	0.0165132	20.3486	-0.0936846	NA
BUB3_NM_001007793	BUB3	NM_001007793	ENSG00000154473	40.428	-0.439798	NA	58.4403	-0.00414941	NA	29.6533	-1.00649	0.0555679	41.858	-0.448736	0.289276	27.842	-1.29144	0.016527	39.8158	-0.584443	0.219269
ADGRE5_NM_001025160	ADGRE5	NM_001025160	ENSG00000123146	70.4145	-0.26218	0.375583	139.483	-0.450243	0.138458	54.9841	-0.55223	0.216179	98.7231	-1.11089	0.00176908	47.6665	-1.0654	0.016527	90.5491	-1.48137	3.01374e-05
NRIP1_NM_003489	NRIP1	NM_003489	ENSG00000180530	61.9012	-0.564038	NA	51.983	-0.236396	NA	47.5386	-1.04393	0.0234518	37.7316	-0.710196	NA	47.145	-1.06767	0.016527	38.5017	-0.650888	0.178893
MIR5188_NR_049820	MIR5188	NR_049820	ENSG00000265345	85.1332	-0.495697	0.121992	39.7519	-0.236894	NA	68.5026	-0.760085	0.0669189	34.9105	-0.183867	NA	64.3668	-0.965313	0.0166215	29.4309	-0.642129	0.255221
AP5Z1_NM_014855	AP5Z1	NM_014855	ENSG00000242802	58.0495	-0.314403	NA	35.6413	0.0786603	NA	48.2129	-0.467361	0.30021	29.0553	0.010968	NA	39.5379	-1.14975	0.0166215	25.0611	-0.339951	NA
STAT5A_NM_001288719	STAT5A	NM_001288719	ENSG00000126561	57.9364	-0.405038	NA	47.0535	-0.328459	NA	47.464	-0.601853	0.184941	35.2528	-0.719966	NA	40.9414	-1.13111	0.0166639	33.7963	-0.855176	0.0915616
NSUN4_NM_001256127	NSUN4	NM_001256127	ENSG00000117481	63.0467	-0.376608	NA	31.1861	0.336763	NA	45.8609	-0.972888	0.0376829	22.0622	0.0500474	NA	44.2646	-1.09395	0.0167186	21.1945	0.022963	NA
RPP40_NM_001286132	RPP40	NM_001286132	ENSG00000124787	50.8004	-0.439764	NA	21.4566	-0.438748	NA	37.9766	-0.970578	0.0502751	18.3088	-0.554505	NA	35.9101	-1.18601	0.0167186	17.7144	-0.684721	NA
SREK1_NM_139168	SREK1	NM_139168	ENSG00000153914	74.2999	-0.506525	0.122312	57.3998	-0.0936438	NA	65.1779	-0.510849	0.21395	49.0357	-0.0875162	0.841032	55.5452	-1.06802	0.0167312	41.1556	-0.551473	0.24167
PPIL1_NM_016059	PPIL1	NM_016059	ENSG00000137168	39.5463	-0.421972	NA	70.2191	-0.343263	NA	34.6536	-0.435294	0.367911	52.0289	-0.772274	0.0652825	26.939	-1.3192	0.0167312	46.88	-1.20164	0.00684114
PWP1_NM_007062	PWP1	NM_007062	ENSG00000136045	54.5755	-0.761703	NA	36.9271	0.156298	NA	45.0983	-1.02917	0.0290552	23.6771	-0.471718	NA	44.1396	-1.11916	0.0167589	25.415	-0.250383	NA
MAP3K1_NM_005921	MAP3K1	NM_005921	ENSG00000095015	65.1212	-0.163917	NA	77.5019	-0.294504	0.335667	45.6551	-0.79	0.0858792	56.2317	-0.796285	0.053555	41.6408	-1.11889	0.0168117	53.6295	-0.972183	0.0226647
GPR132_NM_001278694	GPR132	NM_001278694	ENSG00000183484	71.8113	-0.469025	0.142684	77.8073	-0.588641	0.10625	53.1309	-1.03396	0.0200112	60.323	-0.934582	0.0235794	53.1505	-1.02164	0.0168476	57.4933	-1.15073	0.00538388
CASP3_NM_004346	CASP3	NM_004346	ENSG00000164305	56.2272	-0.66958	NA	38.2591	-0.179152	NA	54.667	-0.374225	0.377553	35.334	0.00401735	NA	44.1005	-1.0893	0.0168965	30.5517	-0.332727	0.528004
MIR7845_NR_106999	MIR7845	NR_106999	ENSG00000277590	49.0203	-0.461972	NA	84.6976	-0.433093	0.190662	36.4461	-1.00622	0.0418687	61.0763	-1.00048	0.0139519	34.6702	-1.19282	0.0168982	56.7212	-1.31887	0.00131694
TMEM167B_NM_020141	TMEM167B	NM_020141	ENSG00000215717	51.016	-0.564547	NA	66.1514	-0.437351	NA	40.608	-0.916614	0.0621016	53.4234	-0.635498	0.137578	37.8989	-1.18636	0.016913	47.1576	-1.08658	0.0219742
CLNS1A_NM_001293	CLNS1A	NM_001293	ENSG00000074201	62.1777	-0.321351	NA	89.3195	-0.360954	0.254858	49.0999	-0.619618	0.190286	72.4516	-0.523586	0.173231	42.5523	-1.12472	0.0169778	66.4307	-0.794135	0.0537975
UBE2Q2_NM_001284382	UBE2Q2	NM_001284382	ENSG00000140367	63.0546	-0.574077	NA	88.4815	-0.423917	0.19344	55.2237	-0.56856	0.1903	66.8505	-0.823047	0.0374379	47.115	-1.10056	0.0169778	64.2353	-0.933005	0.0235643
CNOT8_NM_001301083	CNOT8	NM_001301083	ENSG00000155508	68.6281	-0.326559	NA	64.8382	-0.337372	NA	51.3085	-0.802092	0.0727058	51.898	-0.533763	0.189039	47.7081	-1.06306	0.0169778	43.4471	-1.16157	0.010998
ANXA2_NM_001002857	ANXA2	NM_001002857	ENSG00000182718	70.3351	-0.292113	0.329517	34.6494	0.126112	NA	48.491	-1.08917	0.0213922	25.8815	-0.126222	NA	48.3001	-1.10672	0.0169809	24.6537	-0.230398	NA
LINC00599_NR_024281	LINC00599	NR_024281	ENSG00000253230	105.256	-0.376889	0.203185	116.347	-0.346403	0.247493	82.8671	-0.68385	0.0887483	90.6753	-0.604427	0.102181	76.2681	-0.948991	0.0169978	81.2765	-0.997537	0.00804591
PSMA6_NM_001282232	PSMA6	NM_001282232	ENSG00000100902	63.5386	-0.211438	NA	54.8368	0.148214	NA	42.4151	-1.0561	0.0286787	42.3293	-0.0547917	0.897077	41.3846	-1.1381	0.0170352	37.1184	-0.394594	0.431196
RPL32_NM_001007074	RPL32	NM_001007074	ENSG00000144713	73.4553	-0.379732	0.20606	31.575	-0.257303	NA	53.599	-0.981466	0.0266394	30.5225	-0.00359608	NA	52.8742	-1.01916	0.0170352	28.7373	-0.127316	0.81878
ANAPC10_NM_001256706	ANAPC10	NM_001256706	ENSG00000164162	68.3807	-0.519336	NA	28.999	-0.237773	NA	49.9913	-1.18701	0.00897158	24.7641	-0.244798	NA	51.5225	-1.03529	0.0170352	22.7397	-0.472177	NA
KAT6B_NM_001256468	KAT6B	NM_001256468	ENSG00000156650	54.0558	-0.412131	NA	20.2658	-0.0682939	NA	39.0801	-1.04536	0.0314347	19.1943	0.123449	NA	37.7048	-1.16431	0.0171032	17.0814	-0.0997629	NA
LOC101928034_NR_125947	LOC101928034	NR_125947	N/A	59.9267	-0.538616	NA	59.7785	-0.360592	NA	45.6676	-1.03334	0.0282566	45.7096	-0.680635	0.111371	44.8484	-1.08621	0.017142	39.2611	-1.28491	0.00649932
CEP41_NM_001257158	CEP41	NM_001257158	ENSG00000106477	51.6239	-0.143838	NA	73.8611	-0.879548	NA	32.6311	-1.13382	0.0293047	60.0957	-1.1243	0.00742931	31.8909	-1.25334	0.0172331	55.3366	-1.45446	0.000993325
AMZ2_NM_001033569	AMZ2	NM_001033569	ENSG00000196704	51.6928	-0.503524	NA	46.2666	-0.323832	NA	36.805	-1.25791	0.0128143	36.6786	-0.545402	NA	37.4995	-1.18007	0.0172371	37.1276	-0.495932	0.314206
ITSN2_NM_006277	ITSN2	NM_006277	ENSG00000198399	66.2301	-0.518446	NA	54.118	-0.250569	NA	55.2601	-0.670689	0.125887	47.9589	-0.156415	0.701872	49.4919	-1.0464	0.0172618	37.3181	-0.905977	0.0636601
SLC1A4_NM_003038	SLC1A4	NM_003038	ENSG00000115902	92.3631	-0.347282	0.22714	53.1301	-0.449832	NA	72.0735	-0.684351	0.0929274	46.9666	-0.380828	0.35447	66.7226	-0.939664	0.0172759	41.7725	-0.740543	0.11412
SLC35A3_NM_001271685	SLC35A3	NM_001271685	ENSG00000117620	53.2592	-0.435676	NA	19.3431	-0.172044	NA	43.5788	-0.648991	0.166892	18.0748	-0.0334666	NA	37.6327	-1.15467	0.0173351	18.4427	0.0447192	NA
THUMPD3_NM_001114092	THUMPD3	NM_001114092	ENSG00000134077	47.7341	-0.462951	NA	53.2872	-0.429746	NA	33.8869	-1.22036	0.020724	42.4743	-0.649982	0.129837	33.8387	-1.24828	0.0174311	39.9576	-0.851599	0.0724661
CALM3_NM_005184	CALM3	NM_005184	ENSG00000160014	103.315	-0.427171	0.140526	93.8685	0.0631327	0.807089	84.7139	-0.615435	0.108141	67.0703	-0.381076	0.302422	77.8647	-0.89422	0.0175266	67.1276	-0.348048	0.389066
MBOAT1_NM_001080480	MBOAT1	NM_001080480	ENSG00000172197	54.8807	-0.840824	NA	37.1428	-0.143037	NA	47.4878	-0.941986	0.0405092	26.8676	-0.574804	NA	45.6896	-1.07402	0.0175502	25.3521	-0.71432	NA
TGIF1_NM_001278682	TGIF1	NM_001278682	ENSG00000177426	109.994	-0.358917	0.193043	93.4641	-0.400502	0.203371	91.4864	-0.498112	0.216858	67.1791	-0.968774	0.0142498	80.2172	-0.911344	0.0176033	59.6292	-1.50591	0.000176531
FUBP1_NM_001303433	FUBP1	NM_001303433	ENSG00000162613	45.7217	-0.350761	NA	92.6025	-0.511947	0.130235	35.267	-0.742304	0.137235	69.4224	-0.973608	0.0135631	30.917	-1.25481	0.0176559	68.2112	-1.03155	0.00748432
TRAPPC3_NM_001270895	TRAPPC3	NM_001270895	ENSG00000054116	55.325	-0.445512	NA	39.328	-0.249543	NA	39.9775	-1.04274	0.0390913	33.0234	-0.304348	NA	39.1401	-1.14861	0.0176754	31.0859	-0.46525	0.371838
TST_NM_003312	TST	NM_003312	ENSG00000128311	44.4541	-0.406737	NA	45.9987	-0.0836075	NA	33.1664	-0.92805	0.0669189	34.4026	-0.421465	NA	30.6518	-1.23338	0.0177356	31.1276	-0.702627	0.178639
SUGT1_NM_001130912	SUGT1	NM_001130912	ENSG00000165416	60.2454	-0.780618	NA	26.8307	-0.291174	NA	52.0316	-0.867393	0.0553317	26.0846	-0.040614	NA	49.3774	-1.05987	0.0177729	23.4863	-0.284407	NA
PFKFB4_NM_004567	PFKFB4	NM_004567	ENSG00000114268	52.9365	-0.602606	NA	28.9339	-0.144265	NA	42.6165	-0.8995	0.0568636	24.8878	-0.115647	NA	40.0587	-1.14629	0.0177741	23.4877	-0.234669	NA
CARKD_NM_001242882	CARKD	NM_001242882	ENSG00000213995	57.8998	-0.461524	NA	48.2782	-0.15468	NA	48.4044	-0.606679	0.179081	35.8724	-0.521465	NA	42.0087	-1.1008	0.017821	33.9574	-0.671558	0.186539
COX10-AS1_NR_049718	COX10-AS1	NR_049718	ENSG00000236088	53.195	-0.527213	NA	33.1488	-0.224759	NA	42.3266	-0.858091	0.070767	22.9972	-0.791434	NA	39.2317	-1.12871	0.017821	25.8497	-0.487737	NA
TBL1X_NM_005647	TBL1X	NM_005647	ENSG00000101849	49.6961	-0.566398	NA	36.5487	-0.116864	NA	41.3009	-0.743755	0.121115	28.4331	-0.33093	NA	36.3773	-1.24434	0.0178314	28.1121	-0.381657	0.48292
GPR85_NM_001146266	GPR85	NM_001146266	ENSG00000164604	57.8402	-0.64265	NA	34.9566	-0.870713	NA	47.1074	-0.925651	0.0597457	33.4337	-0.637656	NA	44.9511	-1.10468	0.0179014	29.393	-1.10908	0.0424736
HOXA10-AS_NR_046609	HOXA10-AS	NR_046609	ENSG00000253187	144.859	-0.214112	0.369553	125.79	-0.190318	0.454818	108.04	-0.679611	0.0622967	89.6003	-0.737669	0.0382884	103.32	-0.808484	0.0179186	86.0611	-0.857879	0.0176147
THADA_NM_001083953	THADA	NM_001083953	ENSG00000115970	47.4119	-0.606429	NA	43.2735	-0.406442	NA	37.8243	-0.948267	0.0517817	36.672	-0.463249	NA	35.7339	-1.18186	0.017924	33.6035	-0.725815	0.153894
COPS6_NM_006833	COPS6	NM_006833	ENSG00000168090	67.5162	-0.401771	NA	45.9228	-0.145209	NA	53.8519	-0.685836	0.116724	35.7185	-0.360119	NA	48.4677	-1.04485	0.017924	34.3497	-0.464955	0.369239
PCMTD2_NM_001104925	PCMTD2	NM_001104925	ENSG00000203880	58.0295	-0.404945	NA	42.4804	0.0942326	NA	45.8549	-0.71519	0.117973	31.4577	-0.210718	NA	40.6263	-1.12903	0.0179832	29.3266	-0.382973	0.472297
ALDOA_NM_000034	ALDOA	NM_000034	ENSG00000149925	55.1847	-0.47918	NA	36.4067	0.182444	NA	45.1355	-0.681641	0.143127	25.9222	-0.124815	NA	39.2427	-1.16759	0.0180266	22.3392	-0.514708	NA
DCTN5_NM_001199011	DCTN5	NM_001199011	ENSG00000166847	49.0837	-0.483228	NA	45.1644	-0.325903	NA	39.7968	-0.733277	0.12323	35.2325	-0.595421	NA	35.2646	-1.16987	0.0180268	37.2091	-0.448257	0.370293
CDK12_NM_015083	CDK12	NM_015083	ENSG00000167258	56.6881	-0.484684	NA	54.2181	-0.471906	NA	45.3575	-0.805022	0.0858793	46.158	-0.503524	0.233323	41.6704	-1.11728	0.018038	40.9878	-0.897642	0.0616396
NBR1_NM_001291571	NBR1	NM_001291571	ENSG00000188554	54.6666	-0.454057	NA	82.6242	-0.388194	0.226705	47.0243	-0.511992	0.256451	67.7608	-0.524438	0.171068	39.0987	-1.13134	0.018038	61.5792	-0.827136	0.0438391
MBD4_NM_001276270	MBD4	NM_001276270	ENSG00000129071	69.7369	-0.36618	0.222693	30.8947	-0.0661848	NA	51.6954	-0.887841	0.0463001	27.1219	0.0148382	NA	49.0426	-1.05521	0.018038	28.633	0.162817	0.77013
SLTM_NM_001013843	SLTM	NM_001013843	ENSG00000137776	48.7613	-0.498388	NA	86.2512	-0.233483	0.412229	40.1638	-0.726207	0.127633	63.261	-0.68458	0.0809907	35.7658	-1.16423	0.0180731	60.9453	-0.799311	0.0494144
GRK5_NM_005308	GRK5	NM_005308	ENSG00000198873	57.02	-0.394265	NA	25.105	0.154296	NA	39.917	-1.14118	0.0184137	20.5573	0.118849	NA	40.1132	-1.11846	0.0181188	19.4255	0.05107	NA
HIST1H4A_NM_003538	HIST1H4A	NM_003538	ENSG00000278637	118.733	-0.569686	0.0851047	107.799	-0.413308	0.295255	97.5866	-0.785968	0.0527999	91.5146	-0.540406	0.295396	94.2665	-0.889971	0.0181188	86.1113	-0.759728	0.206631
KLF7_NM_003709	KLF7	NM_003709	ENSG00000118263	64.6561	-0.41513	NA	51.5528	-0.384008	NA	48.4688	-0.905921	0.0471068	38.8969	-0.781105	0.0828083	46.4984	-1.06015	0.0181399	35.1091	-1.15709	0.0195004
CEP135_NM_025009	CEP135	NM_025009	ENSG00000174799	43.1605	-0.535633	NA	50.4713	-0.358364	NA	34.7521	-0.845977	0.097884	43.1319	-0.370023	0.37488	31.2464	-1.25197	0.01818	38.5669	-0.678286	0.161936
DUSP2_NM_004418	DUSP2	NM_004418	ENSG00000158050	56.7191	-0.203671	NA	63.083	-0.201619	NA	41.0387	-0.750553	0.115703	45.9701	-0.637043	0.141589	36.7605	-1.16299	0.0182174	42.8629	-0.887034	0.0572017
KRT79_NM_175834	KRT79	NM_175834	ENSG00000185640	52.9956	-0.728933	NA	33.8554	-0.724227	NA	37.6775	-1.59042	0.0024078	30.0613	-0.699162	NA	41.9543	-1.15538	0.0182752	28.7741	-0.864129	0.107462
TCEB3_NM_003198	TCEB3	NM_003198	ENSG00000011007	45.7734	-0.63614	NA	40.3761	-0.0158435	NA	39.5285	-0.713563	0.137771	32.25	-0.147133	NA	34.6795	-1.1854	0.0182813	30.2712	-0.291381	0.581581
TEX2_NM_001288732	TEX2	NM_001288732	ENSG00000136478	52.42	-0.269449	NA	39.4959	-0.263895	NA	37.074	-0.910117	0.0637874	30.188	-0.54799	NA	34.5369	-1.17657	0.0182813	28.7511	-0.721189	0.175988
SNRPC_NM_003093	SNRPC	NM_003093	ENSG00000124562	59.3217	-0.457723	NA	48.431	-0.402671	NA	50.8115	-0.535221	0.237814	40.5609	-0.493266	0.261224	42.9934	-1.10679	0.0182813	35.6796	-0.920549	0.0731174
PUF60_NM_001136033	PUF60	NM_001136033	ENSG00000179950	66.1878	-0.535276	NA	70.7914	-0.227083	NA	51.3629	-0.932955	0.0410708	49.3228	-0.816742	0.0575687	50.2199	-1.02626	0.0182813	50.5757	-0.712852	0.119023
FAM173B_NM_001258388	FAM173B	NM_001258388	ENSG00000150756	52.8386	-0.142045	NA	32.768	-0.0502392	NA	38.595	-0.634653	0.197272	31.8385	0.256662	NA	32.7413	-1.22295	0.0183296	28.7931	0.062068	0.913897
GART_NM_001136005	GART	NM_001136005	ENSG00000159131	64.3991	-0.367157	NA	87.526	-0.392269	0.225284	55.1475	-0.443737	0.300804	65.6659	-0.825774	0.0404511	45.8325	-1.06392	0.0183934	60.5081	-1.14536	0.0059109
GART_NM_001136006	GART	NM_001136006	ENSG00000159131	64.8284	-0.348436	NA	87.3092	-0.399507	0.218094	55.1475	-0.443737	0.300804	65.6659	-0.825774	0.0404511	45.8325	-1.06392	0.0183934	60.5081	-1.14536	0.0059109
ME2_NM_001168335	ME2	NM_001168335	ENSG00000082212	56.4913	-0.582846	NA	52.4216	-0.201801	NA	42.5791	-1.1478	0.0213922	38.3789	-0.636532	NA	42.7255	-1.14139	0.018412	41.0537	-0.419641	0.373002
NUDCD2_NM_145266	NUDCD2	NM_145266	ENSG00000170584	66.8743	-0.098774	NA	62.5756	-0.419506	NA	47.6718	-0.667557	0.144322	47.9345	-0.772697	0.0685142	41.488	-1.13184	0.0184327	43.7994	-1.13043	0.0147998
DUT_NM_001025248	DUT	NM_001025248	ENSG00000128951	64.4167	-0.281307	NA	55.9597	-0.373553	NA	47.3398	-0.800463	0.0796895	45.6377	-0.516732	0.222625	43.5542	-1.11403	0.0184511	38.43	-1.12243	0.0217244
BTN3A2_NM_001197247	BTN3A2	NM_001197247	ENSG00000186470	38.9986	-0.84918	NA	40.3342	-0.339128	NA	33.5453	-1.00298	0.0483648	31.7077	-0.599618	NA	31.3908	-1.24611	0.0184729	30.128	-0.787192	0.163654
LOC284865_NR_038460	LOC284865	NR_038460	ENSG00000249923	43.1286	-0.391311	NA	31.4289	0.000470739	NA	33.6362	-0.744954	0.135469	25.5925	-0.076244	NA	28.8382	-1.28623	0.0184998	21.8783	-0.491055	NA
EIF5_NM_001969	EIF5	NM_001969	ENSG00000100664	89.4167	-0.586994	0.0801715	48.1828	-0.285113	NA	70.7906	-0.918287	0.0256533	38.1082	-0.505575	NA	70.6483	-0.915654	0.0185369	34.2386	-0.850001	0.0912103
RCN1_NM_002901	RCN1	NM_002901	ENSG00000049449	46.2537	-0.202261	NA	79.2522	-0.434614	0.198103	30.8228	-1.02044	0.0508268	55.2535	-1.1253	0.00775123	29.2265	-1.2455	0.0185732	50.1937	-1.57854	0.000274622
AKT2_NM_001243027	AKT2	NM_001243027	ENSG00000105221	53.9161	-0.343718	NA	46.9188	-0.318411	NA	42.7298	-0.637901	0.179372	41.3304	-0.264293	0.534489	36.8947	-1.14959	0.0185732	35.5303	-0.702989	0.163866
PET117_NM_001164811	PET117	NM_001164811	ENSG00000232838	54.8935	-0.488743	NA	59.1587	-0.208863	NA	37.7373	-1.38878	0.00487681	41.9555	-0.758206	0.0953596	40.2242	-1.12351	0.0185732	38.498	-1.07564	0.0247068
RITA1_NM_001286215	RITA1	NM_001286215	ENSG00000139405	60.2184	-0.442284	NA	38.577	-0.000255756	NA	47.7756	-0.745858	0.102058	30.2897	-0.181882	NA	43.5977	-1.08399	0.0185891	29.2574	-0.242699	0.651415
ESCO2_NM_001017420	ESCO2	NM_001017420	ENSG00000171320	48.4956	-0.281791	NA	48.184	0.0766037	NA	34.8213	-0.875869	0.090725	41.9903	0.158976	0.704999	31.6967	-1.24982	0.018594	43.1538	0.278852	0.556583
CCL5_NM_001278736	CCL5	NM_001278736	ENSG00000271503	48.2385	-0.362264	NA	51.6533	-0.111139	NA	39.8804	-0.546524	0.250866	37.9955	-0.498682	NA	33.1016	-1.1936	0.0185941	30.8275	-1.20904	0.019652
MIR6813_NR_106871	MIR6813	NR_106871	ENSG00000274034	74.9165	-0.541001	0.106641	47.2179	-0.109518	NA	54.9312	-1.17241	0.0079997	27.8886	-1.16844	NA	57.2125	-0.983555	0.0185941	34.5996	-0.477802	0.354737
PRR5-ARHGAP8_NM_181334	PRR5-ARHGAP8	NM_181334	ENSG00000248405	43.0393	-0.445644	NA	28.3763	-0.38164	NA	30.9446	-1.08255	0.039504	25.5266	-0.31546	NA	29.6678	-1.26172	0.0185941	25.9899	-0.247608	NA
PYCARD-AS1_NR_102400	PYCARD-AS1	NR_102400	ENSG00000261359	66.6889	-0.387041	NA	92.9639	-0.398197	0.20728	46.139	-1.18962	0.0105311	68.0129	-0.896267	0.0224568	47.6169	-1.04398	0.0186595	65.2566	-1.02412	0.012459
CALR_NM_004343	CALR	NM_004343	ENSG00000179218	72.6324	-0.566423	0.10073	73.2857	-0.182762	NA	56.5951	-0.939868	0.0385328	58.5553	-0.347357	0.361582	56.0432	-0.984909	0.0186595	59.5489	-0.277691	0.503848
SNORD15A_NR_000005	SNORD15A	NR_000005	ENSG00000206941	83.3263	-0.371647	0.199778	48.3394	0.0605811	NA	62.5826	-0.846508	0.0457232	38.6389	-0.0511605	NA	60.1547	-0.967763	0.0186688	36.1352	-0.190339	0.711254
ANLN_NM_001284301	ANLN	NM_001284301	ENSG00000011426	50.4753	-0.332903	NA	61.7966	0.104326	NA	36.0294	-0.995395	0.0444267	44.4038	-0.304021	0.482951	34.4138	-1.17189	0.0186688	38.6708	-0.714602	0.143782
EIF3B_NM_001037283	EIF3B	NM_001037283	ENSG00000106263	55.3614	-0.47084	NA	43.5212	-0.101926	NA	42.2577	-0.922554	0.055776	29.9631	-0.666178	NA	39.9767	-1.1417	0.0186781	28.9694	-0.741359	0.172063
LZTS2_NM_032429	LZTS2	NM_032429	ENSG00000107816	66.7862	-0.49205	NA	70.3485	-0.551914	NA	52.7294	-0.826344	0.0661322	53.4098	-0.971387	0.0223467	49.9846	-1.02421	0.018729	48.2889	-1.43307	0.00102128
ST7L_NM_017744	ST7L	NM_017744	ENSG00000007341	97.1593	-0.449057	0.140877	149.356	-0.427728	0.148424	86.0334	-0.395168	0.298357	112.237	-0.849886	0.013012	73.46	-0.899554	0.018775	99.7341	-1.34448	0.000100967
IL17RE_NM_001193380	IL17RE	NM_001193380	ENSG00000163701	49.9065	-0.722079	NA	50.9518	-0.279243	NA	40.571	-1.02836	0.0349757	34.9909	-0.946077	NA	39.4663	-1.13052	0.0187884	40.3679	-0.491108	0.309331
ZBTB45_NM_032792	ZBTB45	NM_032792	ENSG00000119574	90.1015	-0.44424	0.140435	69.2305	-0.116237	NA	69.4098	-0.856088	0.0400993	57.5164	-0.155967	0.692639	67.4173	-0.948837	0.0188123	57.2135	-0.146139	0.740453
MIR5093_NR_049816	MIR5093	NR_049816	ENSG00000266307	63.2306	-0.29522	NA	76.2014	-0.56582	0.127971	45.5764	-0.9012	0.0527999	55.6532	-1.17335	0.00664201	43.2705	-1.08618	0.0188346	55.2923	-1.21182	0.00473986
LETM2_NM_001199660	LETM2	NM_001199660	ENSG00000165046	75.2875	-0.516461	0.116017	36.7458	-0.257239	NA	62.095	-0.70312	0.0955088	38.2414	0.189151	NA	57.2224	-0.97813	0.0188843	35.2607	0.0622549	0.90706
RAD17_NM_133343	RAD17	NM_133343	ENSG00000152942	58.0734	-0.26942	NA	57.1345	-0.384928	NA	47.3523	-0.473747	0.301742	44.9542	-0.648012	0.130095	39.0872	-1.12938	0.0189062	43.9563	-0.7261	0.121031
PIWIL4_NM_152431	PIWIL4	NM_152431	ENSG00000134627	121.456	-0.0786175	0.822558	187.791	-0.160504	0.6203	92.7508	-0.324666	0.60313	140.67	-0.501728	0.283014	70.0804	-1.38865	0.0190347	110.33	-1.44516	0.00498064
PHF8_NM_001184897	PHF8	NM_001184897	ENSG00000172943	42.6392	-0.479189	NA	34.5561	-0.159723	NA	35.2677	-0.66955	0.174838	26.8847	-0.39835	NA	30.2814	-1.22969	0.0191012	22.8652	-0.884292	NA
CEP76_NM_001271989	CEP76	NM_001271989	ENSG00000101624	64.2816	-0.318552	NA	59.4401	-0.281195	NA	52.9303	-0.491912	0.260743	42.1791	-0.811206	0.0719124	44.3879	-1.07434	0.0191099	44.2784	-0.679636	0.138368
DCAF8_NR_028106	DCAF8	NR_028106	ENSG00000132716	63.9544	-0.285943	NA	57.4442	-0.514857	NA	48.5299	-0.487509	0.436012	53.2939	-0.300358	0.443055	43.4118	-1.1192	0.0191309	44.1299	-0.866742	0.0597224
NPAT_NM_002519	NPAT	NM_002519	ENSG00000149308	48.1746	-0.500172	NA	57.5089	0.119225	NA	43.3776	-0.43236	0.34974	49.2386	0.168514	0.674	34.9352	-1.16725	0.0191996	39.2632	-0.388087	0.417658
WSB2_NM_001278558	WSB2	NM_001278558	ENSG00000176871	59.3056	-0.402641	NA	29.6769	-0.133769	NA	48.286	-0.631078	0.162936	26.091	-0.0894214	NA	41.949	-1.10176	0.0192205	22.2426	-0.484388	NA
CAPZB_NM_001206540	CAPZB	NM_001206540	ENSG00000077549	63.2458	-0.436809	NA	40.4805	0.0347087	NA	49.5573	-0.815065	0.0728055	29.8813	-0.275195	NA	46.2637	-1.05434	0.0192507	32.9485	-0.0223033	0.96909
ADK_NM_001123	ADK	NM_001123	ENSG00000156110	58.8984	-0.390864	NA	51.3156	-0.278486	NA	44.8834	-0.832675	0.0746545	38.745	-0.62981	0.155539	41.4425	-1.1392	0.0192507	34.8426	-1.01579	0.0417019
RAB37_NM_001006638	RAB37	NM_001006638	ENSG00000172794	56.3789	-0.265826	NA	120.656	-0.56	0.0924988	46.8304	-0.397168	0.370297	89.7608	-1.05976	0.00338656	37.3872	-1.14056	0.0192507	79.7491	-1.60622	8.35331e-06
ZNF804A_NM_194250	ZNF804A	NM_194250	ENSG00000170396	81.7149	-0.371633	0.212299	107.232	-0.457126	0.146151	59.2021	-0.995051	0.0240527	81.52	-0.84999	0.0233691	59.1476	-0.992316	0.0193991	80.1767	-0.907735	0.0156685
NINJ2_NM_001294346	NINJ2	NM_001294346	ENSG00000171840	76.4536	-0.228512	0.418756	115.753	-0.399114	0.185069	59.4417	-0.548384	0.19809	80.4105	-1.11222	0.00294209	51.6956	-1.02011	0.0194225	76.1511	-1.35909	0.000210732
TOP2B_NM_001068	TOP2B	NM_001068	ENSG00000077097	81.4663	-0.301065	0.293407	80.399	-0.132979	0.637077	60.9506	-0.787757	0.0669189	63.9537	-0.308198	0.422293	57.4368	-0.979315	0.0194611	57.5445	-0.614826	0.146001
LINC00582_NR_034037	LINC00582	NR_034037	ENSG00000229228	50.3118	-0.404169	NA	48.4691	-0.50135	NA	37.832	-0.878017	0.0706223	41.0837	-0.559419	0.204355	35.1722	-1.15496	0.0194674	35.1765	-1.09267	0.0269143
MKRN3_NM_005664	MKRN3	NM_005664	ENSG00000179455	43.3192	-0.432757	NA	51.618	-0.477149	NA	34.2353	-0.763343	0.149175	40.703	-0.752436	0.0973839	30.0244	-1.28257	0.0194674	44.685	-0.463659	0.325274
ZNF511_NM_145806	ZNF511	NM_145806	ENSG00000198546	70.5742	-0.305593	0.30316	28.401	0.185295	NA	47.2066	-1.17808	0.0115686	22.1164	0.0709721	NA	49.0009	-1.0257	0.0195406	22.871	0.184407	NA
NUP155_NM_001278312	NUP155	NM_001278312	ENSG00000113569	39.5478	-0.474965	NA	38.4614	-0.304057	NA	33.1031	-0.62399	0.208417	31.8507	-0.406643	NA	27.1267	-1.30658	0.0195504	28.4398	-0.750926	0.159255
ZBTB33_NM_006777	ZBTB33	NM_006777	ENSG00000177485	115.174	-0.0280743	0.91639	186.233	-0.175854	0.456524	87.7745	-0.370405	0.349454	136.568	-0.623684	0.0569997	73.2091	-0.971651	0.0195795	115.169	-1.29077	8.03814e-05
RAD1_NM_002853	RAD1	NM_002853	ENSG00000113456	65.3829	-0.407067	NA	35.7614	-0.15521	NA	51.2123	-0.724399	0.125097	26.0969	-0.575606	NA	46.6137	-1.07116	0.0196081	29.7201	-0.231582	0.671736
[truncated: 29,289 more rows]
